# Supplementary material for: Molecular packings and specific-bonding patterns in sulfonamides
Source: Royal Society of Chemistry journal article supplement (doi:10.1039/c4nj00392f), 2014-01-01
Supplement: c4nj00392f2.xlsx [file c4nj00392f2.xlsx]

## Sheet: S1_packings_dist
fcu/cubic closest packing; 12/3/c1; sqc19	244	23.8049		fcu/cubic closest packing; 12/3/c1; sqc19	109	25.8294
hcp/hexagonal closest packing; 12/3/h1	128	12.4878		hcp/hexagonal closest packing; 12/3/h1	48	11.3744
bcu-x/ 14-conn;I m -3 m->C m c m (a-b,a+b,c; 1/4,1/4,1/4);Bond sets: 2,3,4,5:bcu-x	32	3.12195		bcu-x/ 14-conn;I m -3 m->C m c m (a-b,a+b,c; 1/4,1/4,1/4);Bond sets: 2,3,4,5:bcu-x	13	3.08057
12T11	22	2.14634		bcu-x/ 14-conn;I m -3 m->P 21/c (1/2a+1/2b+1/2c,2a-2b,-c; 1/2,0,1/2);Bond sets: 1,2,4,5,7,8,9:bcu-x	8	1.89573
12T5	18	1.7561		bcu-x/ 14-conn;I m -3 m->I b c a (a+b,c,2a-2b; 3/4,1/4,1/4);Bond sets: 1,2,3,5,6:bcu-x	7	1.65877
12T15	15	1.46341		12T11	7	1.65877
12T25	12	1.17073		12T5	6	1.4218
bcu-x/ 14-conn;I m -3 m->P 21/c (1/2a+1/2b+1/2c,2a-2b,-c; 1/2,0,1/2);Bond sets: 1,2,4,5,7,8,9:bcu-x	12	1.17073		12T15	6	1.4218
ild; sqc15	11	1.07317		bcu-x/ 14-conn;I m -3 m->C m c m (a+b,c,a-b; 1/4,3/4,1/4);Bond sets: 1,3,4,5:bcu-x	5	1.18483
bcu-x/ 14-conn;I m -3 m->P 21/c (1/2a+1/2b+1/2c,-a+b,-a-b+c; 1/2,0,0);Bond sets: 1,2,3,5,7,8,9:bcu-x	11	1.07317		bcu-x/ 14-conn;I m -3 m->P 21/c (1/2a+1/2b+1/2c,-a+b,-a-b+c; 1/2,0,0);Bond sets: 1,2,3,5,7,8,9:bcu-x	5	1.18483
bcu-x/ 14-conn;I m -3 m->I b c a (a+b,c,2a-2b; 3/4,1/4,1/4);Bond sets: 1,2,3,5,6:bcu-x	9	0.878049		ild; sqc15	5	1.18483
12T23	8	0.780488		12T8	4	0.947867
12T78	8	0.780488		12T104	4	0.947867
12T8	6	0.585366		12T75	4	0.947867
bcu-x/ 14-conn;I m -3 m->I 41/a c d (2a,2b,2c; 1/2,1/2,1/2);Bond sets: 1,2,3,5,6:bcu-x	6	0.585366		12T12	4	0.947867
12,12T30	6	0.585366		12T74	4	0.947867
bcu-x/ 14-conn;I m -3 m->P -1 (-1/2a+1/2b+1/2c,1/2a-1/2b+1/2c,a+b; 3/4,3/4,1/4);Bond sets: 2,3,4,5,6,7,8,9,11:bcu-x	5	0.487805		12T70	3	0.7109
12T21	5	0.487805		12T6	3	0.7109
12T27	5	0.487805		12T25	3	0.7109
12T58	5	0.487805		12T56	3	0.7109
12T77	5	0.487805		12T83	3	0.7109
bcu-x/ 14-conn;I m -3 m->C m c m (a+b,c,a-b; 1/4,3/4,1/4);Bond sets: 1,3,4,5:bcu-x	4	0.390244		12T35	3	0.7109
12T37	4	0.390244		bcu-x/ 14-conn;I m -3 m->P n m a (2a,c,-b; 1/4,1/4,1/4);Bond sets: 2,3,4,5,6:bcu-x	2	0.473934
12T44	4	0.390244		12T77	2	0.473934
12T46	4	0.390244		12T106	2	0.473934
12T56	4	0.390244		12,12T42	2	0.473934
12,12T17	4	0.390244		12T108	2	0.473934
12,12T29	4	0.390244		bcu-x/ 14-conn;I m -3 m->P -1 (-1/2a+1/2b+1/2c,1/2a-1/2b+1/2c,a+b; 3/4,3/4,1/4);Bond sets: 2,3,4,5,6,7,8,9,11:bcu-x	2	0.473934
12T9	3	0.292683		12T20	2	0.473934
12T12	3	0.292683		12,12T45	2	0.473934
12T18	3	0.292683		12T118	2	0.473934
12T19	3	0.292683		12T46	2	0.473934
12T34	3	0.292683		12T124	2	0.473934
12T35	3	0.292683		12T102	1	0.236967
12T53	3	0.292683		12T94	1	0.236967
12T61	3	0.292683		12T63	1	0.236967
12T75	3	0.292683		12T103	1	0.236967
gsp1	3	0.292683		12T105	1	0.236967
12T81	3	0.292683		12T47	1	0.236967
bcu-x/ 14-conn;I m -3 m->P n m a (2a,c,-b; 1/4,1/4,1/4);Bond sets: 2,3,4,5,6:bcu-x	3	0.292683		12T42	1	0.236967
12,12T5	3	0.292683		12T107	1	0.236967
bcu-x/ 14-conn;I m -3 m->C 2/c (-a+b,-a-b,2c; 1/4,3/4,1/4);Bond sets: 2,4,5,6,7,8,9,10:bcu-x	2	0.195122		12T43	1	0.236967
12T33	2	0.195122		12T85	1	0.236967
bcu-x/ 14-conn;I m -3 m->P 42/n m c (a,b,2c; 1/4,1/4,1/4);Bond sets: 1,2,4,5:bcu-x	2	0.195122		12,12T43	1	0.236967
12T38	2	0.195122		12T53	1	0.236967
12T40	2	0.195122		12T92	1	0.236967
12T42	2	0.195122		12T34	1	0.236967
12T45	2	0.195122		12T109	1	0.236967
12T50	2	0.195122		12T110	1	0.236967
12T51	2	0.195122		12T111	1	0.236967
12T59	2	0.195122		12,12T44	1	0.236967
12T66	2	0.195122		12T112	1	0.236967
12T71	2	0.195122		12T45	1	0.236967
12T74	2	0.195122		12T113	1	0.236967
12T83	2	0.195122		12T114	1	0.236967
12T88	2	0.195122		12T115	1	0.236967
bcu-x/ 14-conn;I m -3 m->I b c a (a-b,a+b,2c; 1/4,1/4,3/4);Bond sets: 2,3,4,5,6:bcu-x	2	0.195122		12T116	1	0.236967
12T92	2	0.195122		12T97	1	0.236967
12T94	2	0.195122		12T117	1	0.236967
12,12T4	2	0.195122		12T119	1	0.236967
12,12T7	2	0.195122		12T120	1	0.236967
12,12T9	2	0.195122		12T121	1	0.236967
12,12T12	2	0.195122		12T40	1	0.236967
12,12T13	2	0.195122		12T100	1	0.236967
12,12T14	2	0.195122		12T122	1	0.236967
12,12T19	2	0.195122		12T123	1	0.236967
12,12T22	2	0.195122		12,12T46	1	0.236967
bcu-x/ 14-conn;I m -3 m->C 2/c (a+3b,c,a-b; 3/4,3/4,1/4);Bond sets: 1,2,3,5,6,7,8,10:bcu-x	2	0.195122		12T125	1	0.236967
12,12T24	2	0.195122		12T126	1	0.236967
12,12T25	2	0.195122		12T127	1	0.236967
12,12T26	2	0.195122		12T128	1	0.236967
bcu-x/ 14-conn;I m -3 m->I -4 2 d (a-b,a+b,2c; 1/2,0,1/4);Bond sets: 1,2,4,5:bcu-x	2	0.195122		12T129	1	0.236967
12,12T28	2	0.195122		12T93	1	0.236967
12,12T31	2	0.195122		12,12T6	1	0.236967
12,12T33	2	0.195122			320
12,12T35	2	0.195122
12T16	2	0.195122
12,12T38	2	0.195122
12,12T39	2	0.195122
12,12T41	2	0.195122
12T10	1	0.097561
12T13	1	0.097561
12T14	1	0.097561
12T17	1	0.097561
12T20	1	0.097561
12T22	1	0.097561
12T24	1	0.097561
12T26	1	0.097561
12T28	1	0.097561
12T29	1	0.097561
12T30	1	0.097561
12T31	1	0.097561
12T32	1	0.097561
bcu-x/ 14-conn;I m -3 m->C 2/c (2c,2b,-a-c; 1/4,3/4,3/4);Bond sets: 1,3,4,5,6,8,9,10,11:bcu-x	1	0.097561
12T41	1	0.097561
12T43	1	0.097561
12T47	1	0.097561
12T48	1	0.097561
12T49	1	0.097561
12T52	1	0.097561
12T54	1	0.097561
12T55	1	0.097561
12T57	1	0.097561
12T60	1	0.097561
12T62	1	0.097561
12T63	1	0.097561
12T64	1	0.097561
12T65	1	0.097561
12T67	1	0.097561
12T68	1	0.097561
12T69	1	0.097561
12T70	1	0.097561
12T72	1	0.097561
12T73	1	0.097561
12T76	1	0.097561
12T79	1	0.097561
12T80	1	0.097561
12T82	1	0.097561
12T84	1	0.097561
12T85	1	0.097561
12T87	1	0.097561
12T89	1	0.097561
12T90	1	0.097561
12T91	1	0.097561
12T95	1	0.097561
12T96	1	0.097561
12T97	1	0.097561
12T6	1	0.097561
12,12T8	1	0.097561
12,12T10	1	0.097561
12T98	1	0.097561
12,12T11	1	0.097561
12T99	1	0.097561
12,12T15	1	0.097561
12,12T16	1	0.097561
12T100	1	0.097561
12,12T18	1	0.097561
12T101	1	0.097561
12,12T20	1	0.097561
12,12T21	1	0.097561
12,12T23	1	0.097561
12,12T27	1	0.097561
12,12T32	1	0.097561
12,12T34	1	0.097561
12,12,12T7	1	0.097561
12,12T36	1	0.097561
12T36	1	0.097561
12T39	1	0.097561
12T86	1	0.097561
12,12T37	1	0.097561
bcu-x/ 14-conn;I m -3 m->P b c n (2a+2b,c,a-b; 1/4,1/4,1/4);Bond sets: 1,2,3,5,6,7,9:bcu-x	1	0.097561
12,12T40	1	0.097561
	790

## Sheet: S2_H bonds_dist
B01	342	33.8949			2C1	385	39.6498
B2	310	30.7235			1M2-1	349	35.9423
K4	79	7.82953			sql/Shubnikov tetragonal plane net	77	7.92997
K21	64	6.34291			hcb; Shubnikov hexagonal plane net/(6,3)	42	4.32544
K02	46	4.55897			SP 1-periodic net (4,4)(0,2)	27	2.78064
K002	23	2.27948			SP 1-periodic net (3,6)(1,2)	13	1.33883
G22	17	1.68484			dia Diamond; 4/6/c1; sqc6	7	0.720906
G41	17	1.68484			pcu alpha-Po primitive cubic; 6/4/c1; sqc1	7	0.720906
T02	12	1.1893			SP 1-periodic net (4,4)(2,2)	5	0.514933
G6	8	0.792864			cem; Shubnikov plane net (3^3.4^2)	5	0.514933
P22	8	0.792864			1,3M4-1	5	0.514933
T4	7	0.693756			SP 2-periodic net (4.8^2)IIa or tts; Shubnikov plane net (3^2.4.3.4)	4	0.411946
T21	7	0.693756			bnn hexagonal BN; 5/4/h5; sqc12	4	0.411946
T3	7	0.693756			hxl/Shubnikov plane net (3,6)	3	0.30896
M1	6	0.594648			SP 2-periodic net (4,4)Ia; SnS	3	0.30896
M1	5	0.49554			bct; 10/3/t1; sqc8	3	0.30896
P6	4	0.396432			2M4-1	2	0.205973
P31	4	0.396432			sqp; 5/4/t6; sqc13	2	0.205973
G03	3	0.297324			vcm; 7/3/o12; hex-7-Cmce-1	2	0.205973
H82	3	0.297324			gis Gismondine GIS; 4/4/t3; sqc2200	2	0.205973
P41	3	0.297324			1,2M4-1	2	0.205973
T11	3	0.297324			nov; 5/4/o8	2	0.205973
K0001	2	0.198216			4,6T129	2	0.205973
P03	2	0.198216			sxd; 6/3/o1	1	0.102987
H61	2	0.198216			ecu-6-Pnna	1	0.102987
H42	2	0.198216			noz; 5/4/o7	1	0.102987
O42	2	0.198216			cco-6-Pbcm	1	0.102987
O23	2	0.198216			nce-6-C2/c	1	0.102987
H23	2	0.198216			4,5L70	1	0.102987
H51	2	0.198216			2,3C2	1	0.102987
K5	2	0.198216			wgy; 6/3/t11 or skd; 6/3/o3	1	0.102987
N24	1	0.099108			3,4C4	1	0.102987
H202	1	0.099108			3,5L50	1	0.102987
P002	1	0.099108			1,2M3-1	1	0.102987
G002	1	0.099108			3,4L88	1	0.102987
T0001	1	0.099108			3,4L22	1	0.102987
K011	1	0.099108			ths ThSi2; 3/10/t4	1	0.102987
B11	1	0.099108			4,6L26	1	0.102987
P0101	1	0.099108			fsc; sqc11	1	0.102987
G2001	1	0.099108			3,5L67	1	0.102987
T001	1	0.099108			2(3)2/2-plane minimal net; plane SP KIa	1	0.102987
G42	1	0.099108				971
H1101	1	0.099108
G1101	1	0.099108
	1009

## Sheet: S3_Mixed_dist
H bonds without halogen bonds					Halogen bonds without H bonds
overall topologies
1M2-1	43	50.5882			2C1	61	64.2105
2C1	21	24.7059			1M2-1	27	28.4211
sql/Shubnikov tetragonal plane net	11	12.9412			sql/Shubnikov tetragonal plane net	2	2.10526
pcu alpha-Po primitive cubic; 6/4/c1; sqc1	2	2.35294			hcb; Shubnikov hexagonal plane net/(6,3)	2	2.10526
SP 2-periodic net (4,4)IIb	1	1.17647			SP 1-periodic net (3,6)(1,2)	1	1.05263
sqp; 5/4/t6; sqc13	1	1.17647			gis Gismondine GIS; 4/4/t3; sqc2200	1	1.05263
lig LiGe; 3/8/t1; sqc978	1	1.17647			1,2M3-1	1	1.05263
1,2M4-1	1	1.17647				95
hcb; Shubnikov hexagonal plane net/(6,3)	1	1.17647
4,5L61	1	1.17647
hxl/Shubnikov plane net (3,6)	1	1.17647
2,3C1	1	1.17647
	85
local topologies
B01	43	50.5882			B2	59	61.4583
B2	16	18.8235			B01	14	14.5833
K4	8	9.41176			M1	14	14.5833
G6	1	1.17647			M2	3	3.125
K02	4	4.70588			K4	2	2.08333
O42	2	2.35294			B4	1	1.04167
G22	2	2.35294			T21	1	1.04167
G002	1	1.17647			K31	1	1.04167
P41	1	1.17647			B3	1	1.04167
K21	1	1.17647				96
P31	1	1.17647
T11*M1	1	1.17647
G03*K02	1	1.17647
G23*G22	1	1.17647
K42	1	1.17647
P102*K102*K002)2	1	1.17647
	85

## Sheet: S4_MCTS-underlying net_dist
K4	sql	57	76			sql	K4	56	74.6667
	SP 1-periodic net (3,6)(1,2)	11	14.6667				G22	14	18.6667
	dia	4	5.33333				P22	3	4
	gis	2	2.66667				H202	1	1.33333
	SP 1-periodic net (4,4)(2,2)	1	1.33333				T4	1	1.33333
		75						75
K21	hcb	34	59.6491			2C1	B2	300	78.7402
	SP 1-periodic net (4,4)(0,2)	23	40.3509				K02	46	12.0735
		57					K002	22	5.77428
							T02	10	2.62467
							P002	1	0.262467
							G002	1	0.262467
							P0101	1	0.262467
								381
						dimer	B01	339	97.1347
							M1	6	1.7192
							K0001	2	0.573066
							T001	1	0.286533
							T0001	1	0.286533
								349
						hcb	K21	34	87.1795
							G03	3	7.69231
							T21	2	5.12821
								39
						SP 1-periodic net (4,4)(0,2)	K21	23	85.1852
							P03	2	7.40741
							T3	1	3.7037
							T21	1	3.7037
								27

## Sheet: S5_packings
ABEDOC	C28 H22 N2 O2 S1/Omega=1.65%(Set #10)	N-(2-Cyano-1,3,3-triphenylprop-2-en-1-yl)benzenesulfonamide.	Yuanxun Zhu,Shan Wen,Guangwei Yin,Deng Hong,Ping Lu,Yanguang Wang	Org.Lett.,2011,13,,3553	P-1	fcu/cubic closest packing; 12/3/c1; sqc19
ABEMOK	C21 H27 N1 O4 S1/Omega=2.80%(Set #8)	N-(3-Isopropoxy-4-methoxy-2-((E)-1-propenyl)benzyl)(phenyl)methanesulfonamide.	W.A.L.van Otterlo,J.-L.Panayides,M.A.Fernandes	ACTA CRYSTALLOGR.,SECT.E:STRUCT.REP.ONLINE,2004,60,,o1586	P21/c	12T8
ADAGUI	C10 H7 Cl1 N4 O2 S2/Omega=3.02%(Set #8)	6-(4-Chlorophenyl)imidazo(2,1-b)(1,3,4)thiadiazole-2-sulfonamide.	G.N.Anilkumar,M.K.Kokila,Puttaraja,S.S.Karki,M.V.Kulkarni	ACTA CRYSTALLOGR.,SECT.E:STRUCT.REP.ONLINE,2006,62,,o2014	P21/c	fcu/cubic closest packing; 12/3/c1; sqc19
AFOQOB	C17 H25 N1 O4 S1/Omega=2.16%(Set #8)	N-(2-t-Butyl-5-ethyl-4H-1,3-dioxin-4-yl)-4-methyl-benzenesulfonamide.	C.Wattenbach,S.Flock,H.Frauenrath,R.Palme-Konig,U.Muller	Z.KRISTALLOGR.-NEW CRYST.STRUCT.,2001,216,,401	P21/c	fcu/cubic closest packing; 12/3/c1; sqc19
AHEQAF	C18 H19 N3 O3 S1/Omega=3.62%(Set #8)	N-(3-Cyano-2-oxo-2,5,6,7,8,9-hexahydro-1H-cyclohepta(b)pyridin-1-yl)-4-methylbenzenesulfonamide.	G.H.Elgemeie,M.A.Mahmoud,P.G.Jones	ACTA CRYSTALLOGR.,SECT.E:STRUCT.REP.ONLINE,2002,58,,o1293	P21/n	12T9
AHUCEM	C14 H21 N1 O5 S1/Omega=3.85%(Set #6)	N-(4,5-Dihydroxy-3-(hydroxymethyl)-1-hexen-3-yl)-4-methylbenzenesulfonamide.	X.Ariza,J.Cornella,M.Font-Bardia,J.Garcia,J.Ortiz,C.Sanchez,X.Solans	Angew.Chem.,Int.Ed.,2009,48,,4202	P212121	hcp/hexagonal closest packing; 12/3/h1
AJIBAX	C14 H15 N1 O2 S1/Omega=3.72%(Set #7)	4-Methyl-N-(2-methylphenyl)benzenesulfonamide.	P.G.Nirmala,B.T.Gowda,S.Foro,H.Fuess	ACTA CRYSTALLOGR.,SECT.E:STRUCT.REP.ONLINE,2009,65,,o3184	Pbca	fcu/cubic closest packing; 12/3/c1; sqc19
AQULII	C27 H31 N1 O3 S1/Omega=3.75%(Set #8)	N-(3-Hydroxy-3-phenyl-2-(5,6,7,8-tetrahydronaphthalen-2-yl)propyl)-N,4-dimethylbenzenesulfonamide.	P.Valenta,P.J.Carroll,P.J.Walsh	J.AM.CHEM.SOC.,2010,132,,14179	P21/n	fcu/cubic closest packing; 12/3/c1; sqc19
ATAHOT	C23 H19 N1 O3 S1/Omega=2.18%(Set #6)	N-((1-Hydroxy-2-naphthyl)(phenyl)methyl)benzenesulfonamide.	Guixia Liu,Shilei Zhang,Hao Li,Tangzhi Zhang,Wei Wang	Org.Lett.,2011,13,,828	P21	fcu/cubic closest packing; 12/3/c1; sqc19
ATAJEL	C26 H25 N3 O6 S1/Omega=2.49%(Set #8)	N-(1-Acetyl-3-(1-(4-methoxyphenyl)-2-nitroethyl)-1H-indol-2-yl)-4-methylbenzenesulfonamide.	Zhiyuan Chen,Danqing Zheng,Jie Wu	Org.Lett.,2011,13,,848	P21/n	fcu/cubic closest packing; 12/3/c1; sqc19
ATEGUC	C28 H22 I1 N1 O2 S1/Omega=4.08%(Set #10)	N-(2-Iodo-1,3-diphenyl-1H-inden-1-yl)-4-methylbenzenesulfonamide.	Yuanxun Zhu,Guangwei Yin,Deng Hong,Ping Lu,Yanguang Wang	Org.Lett.,2011,13,,1024	P-1	fcu/cubic closest packing; 12/3/c1; sqc19
ATOVOU	C15 H21 N1 O2 S1/Omega=5.77%(Set #6)	N-((1S,2R,5S)-(Bicyclo(3.3.0)oct-2-yl))-4-methylbenzenesulfonamide.	P.Muller,D.Riegert,G.Bernardinelli	HELV.CHIM.ACTA,2004,87,,227	P212121	fcu/cubic closest packing; 12/3/c1; sqc19
ATOVUA	C16 H23 N1 O2 S1/Omega=4.53%(Set #6)	N-((1S,2R,6S)-(Bicyclo(4.3.0)non-2-yl))-4-methylbenzenesulfonamide.	P.Muller,D.Riegert,G.Bernardinelli	HELV.CHIM.ACTA,2004,87,,227	P212121	fcu/cubic closest packing; 12/3/c1; sqc19
ATUHAZ	C19 H20 N2 O4 S1/Omega=2.49%(Set #7)	4-Methyl-N-(1-(4-methyl-5-oxo-2-phenyl-4,5-dihydro-1,3-oxazol-4-yl)ethyl)benzenesulfonamide.	A.D.Melhado,G.W.Amarante,Z.J.Wang,M.Luparia,F.D.Toste	J.AM.CHEM.SOC.,2011,133,,3517	P3121	12T10
ATUHED	C26 H26 N2 O4 S1/Omega=0.29%(Set #6)	2,4,6-Trimethyl-N-((4-methyl-5-oxo-2-phenyl-4,5-dihydro-1,3-oxazol-4-yl)(phenyl)methyl)benzenesulfonamide unknown solvate.	A.D.Melhado,G.W.Amarante,Z.J.Wang,M.Luparia,F.D.Toste	J.AM.CHEM.SOC.,2011,133,,3517	P212121	fcu/cubic closest packing; 12/3/c1; sqc19
AVOHUP	C24 H21 N1 O3 S1/Omega=5.53%(Set #6)	N-((2-Hydroxy-1-naphthyl)(phenyl)methyl)-4-methylbenzenesulfonamide.	P.Chauhan,S.S.Chimni	EUR.J.ORG.CHEM.,2011,,,1636	P21	12T11
AWICIT	C14 H11 Cl2 N1 O3 S1/Omega=2.54%(Set #8)	N-(4-acetylphenyl)-2,5-dichlorobenzenesulfonamide.	W.B.Fernandes,A.Q.Aragao,F.T.Martins,C.Noda-Perez,C.Lariucci,H.B.Napolitano	ACTA CRYSTALLOGR.,SECT.C:CRYST.STRUCT.COMMUN.,2011,67,,o226	P21/c	12T12
AWIHUK01	C32 H31 N1 O7 S1/Omega=4.80%(Set #8)	dibenzyl 2-benzyl-2-hydroxy-3-(4-methylphenylsulfonamido)-succinate.	S.Mekki,V.Rolland,S.Bellahouel,A.van der Lee,M.Rolland	ACTA CRYSTALLOGR.,SECT.C:CRYST.STRUCT.COMMUN.,2011,67,,o301	P21/c	bcu-x/ 14-conn;I m -3 m->C m c m (a-b,a+b,c; 1/4,1/4,1/4);Bond sets: 2,3,4,5:bcu-x
AYEQAW	C46 H50 B1 N1 O7 S1 Si1/Omega=1.58%(Set #6)	N-[1-(3-(4,5-bis[methoxy(diphenyl)methyl]-1,3,2-dioxaborolan-2-yl)-2-furyl)-2-trimethylsilylethyl]-4-methylbenzenesulfonamide.	Ho-Kee Yim,H.N.C.Wong	J.ORG.CHEM.,2004,69,,2892	I4	12T13
AYURUI	C17 H22 N2 O4 S2/Omega=7.02%(Set #3)	N,N'-Propane-1,3-diylbis(4-methylbenzenesulfonamide).	I.U.Khan,T.A.Sheikh,Ejaz,W.T.A.Harrison	ACTA CRYSTALLOGR.,SECT.E:STRUCT.REP.ONLINE,2011,67,,o2371	Aba2	fcu/cubic closest packing; 12/3/c1; sqc19
AZADEL	C11 H13 N3 O2 S1/Omega=3.04%(Set #8)	4-(3,5-Dimethyl-1H-pyrazol-1-yl)benzenesulfonamide.	A.M.Asiri,H.M.Faidallah,A.O.Al-Youbi,S.W.Ng	ACTA CRYSTALLOGR.,SECT.E:STRUCT.REP.ONLINE,2011,67,,o2427	P21/n	12T14
AZADIP	C15 H13 N3 O3 S1/Omega=1.97%(Set #8)	4-(5-Oxo-3-phenyl-4,5-dihydro-1H-pyrazol-1-yl)benzenesulfonamide.	A.O.Al-Youbi,A.M.Asiri,H.M.Faidallah,K.A.Alamry,S.W.Ng	ACTA CRYSTALLOGR.,SECT.E:STRUCT.REP.ONLINE,2011,67,,o2428	P21/c	fcu/cubic closest packing; 12/3/c1; sqc19
AZAGUE	C18 H17 N3 O2 S1/Omega=2.22%(Set #8)	4-(3-Methyl-4,5-dihydro-1H-benzo[g]indazol-1-yl)benzenesulfonamide.	A.M.Asiri,H.M.Faidallah,A.O.Al-Youbi,M.S.I.T.Makki,S.W.Ng	ACTA CRYSTALLOGR.,SECT.E:STRUCT.REP.ONLINE,2011,67,,o2441	P21/n	12T15
AZAHUF	C20 H23 N3 O3 S3/Omega=2.73%(Set #6)	N-((2S)-3-Hydroxy-4-[(5-methyl-1,3,4-thiadiazol-2-yl)sulfanyl]-1-phenyl-2-butyl)-4-methylbenzenesulfonamide.	C.R.B.Gomes,T.R.A.Vasconcelos,W.T.V.Junior,W.Cunico,J.L.Wardell,S.M.S.V.Wardell,E.R.T.Tiekink	ACTA CRYSTALLOGR.,SECT.E:STRUCT.REP.ONLINE,2011,67,,o2447	P212121	hcp/hexagonal closest packing; 12/3/h1
AZAKUI	C19 H20 N2 O2 S1/Omega=1.80%(Set #8)	N-Benzyl-5-(dimethylamino)naphthalene-1-sulfonamide.	P.Bhatt,T.Govender,H.G.Kruger,G.E.M.Maguire	ACTA CRYSTALLOGR.,SECT.E:STRUCT.REP.ONLINE,2011,67,,o2458	C2/c	ild; sqc15
AZERIH	C15 H17 N1 O2 S1/Omega=4.94%(Set #8)	N-(2,6-Dimethylphenyl)-3-methylbenzenesulfonamide.	P.Sanphui,B.Sarma,A.Nangia	CRYST.GROWTH DES.,2010,10,,4550	P21/c	fcu/cubic closest packing; 12/3/c1; sqc19
AZERIH01	C15 H17 N1 O2 S1/Omega=1.35%(Set #10)	N-(2,6-Dimethylphenyl)-3-methylbenzenesulfonamide.	P.Sanphui,B.Sarma,A.Nangia	CRYST.GROWTH DES.,2010,10,,4550	P-1	fcu/cubic closest packing; 12/3/c1; sqc19
AZERON01	C13 H11 Cl2 N1 O2 S1/Omega=4.94%(Set #6)	N-(2,6-Dichlorophenyl)-3-methylbenzenesulfonamide.	P.Sanphui,B.Sarma,A.Nangia	CRYST.GROWTH DES.,2010,10,,4550	P21	hcp/hexagonal closest packing; 12/3/h1
AZERUT	C14 H14 Cl1 N1 O2 S1/Omega=2.11%(Set #8)	N-(2,6-Dimethylphenyl)-3-chlorobenzenesulfonamide.	P.Sanphui,B.Sarma,A.Nangia	CRYST.GROWTH DES.,2010,10,,4550	P21/n	hcp/hexagonal closest packing; 12/3/h1
AZESAA	C13 H11 Cl2 N1 O2 S1/Omega=1.94%(Set #8)	3-Chloro-N-(2-chloro-6-methylphenyl)benzenesulfonamide.	P.Sanphui,B.Sarma,A.Nangia	CRYST.GROWTH DES.,2010,10,,4550	P21/n	hcp/hexagonal closest packing; 12/3/h1
AZESOO	C12 H9 Cl2 N1 O2 S1/Omega=2.97%(Set #7)	N-(4-chlorophenyl)-3-chlorobenzenesulfonamide.	P.Sanphui,B.Sarma,A.Nangia	CRYST.GROWTH DES.,2010,10,,4550	Pbca	bcu-x/ 14-conn;I m -3 m->I b c a (a+b,c,2a-2b; 3/4,1/4,1/4);Bond sets: 1,2,3,5,6:bcu-x
AZESUU	C13 H12 Cl1 N1 O2 S1/Omega=3.58%(Set #8)	N-(4-chlorophenyl)-3-methylbenzenesulfonamide.	P.Sanphui,B.Sarma,A.Nangia	CRYST.GROWTH DES.,2010,10,,4550	P21/c	fcu/cubic closest packing; 12/3/c1; sqc19
AZETAB	C13 H12 F1 N1 O2 S1/Omega=2.60%(Set #8)	N-(3-fluorophenyl)-4-methylbenzenesulfonamide.	P.Sanphui,B.Sarma,A.Nangia	CRYST.GROWTH DES.,2010,10,,4550	P21/n	hcp/hexagonal closest packing; 12/3/h1
AZETAB01	C13 H12 F1 N1 O2 S1/Omega=3.43%(Set #8)	N-(3-fluorophenyl)-4-methylbenzenesulfonamide.	P.Sanphui,B.Sarma,A.Nangia	CRYST.GROWTH DES.,2010,10,,4550	P21/c	bcu-x/ 14-conn;I m -3 m->C m c m (a-b,a+b,c; 1/4,1/4,1/4);Bond sets: 2,3,4,5:bcu-x
AZETIJ	C14 H14 F1 N1 O2 S1/Omega=3.54%(Set #9)	N-(3-fluoro-4-methylphenyl)-4-methylbenzenesulfonamide.	P.Sanphui,B.Sarma,A.Nangia	CRYST.GROWTH DES.,2010,10,,4550	P-1	bcu-x/ 14-conn;I m -3 m->C m c m (a-b,a+b,c; 1/4,1/4,1/4);Bond sets: 2,3,4,5:bcu-x
AZTSCH	C34 H54 N4 O2 S1/Omega=2.00%(Set #6)	3\b-Azido-2\a-(toluene-p-sulfonamido)-5\a-cholestane.	G.M.L.Cragg,P.A.McCallum,L.R.Nassimbeni,A.L.Rodgers,J.C.van Niekerk	S.Afr.J.Chem.,1979,32,,97	P21	hcp/hexagonal closest packing; 12/3/h1
AZUGAE	C15 H16 Cl1 N1 O2 S1/Omega=2.47%(Set #8)	4-Chloro-N-(2,4-dimethylphenyl)-2-methylbenzenesulfonamide.	V.Z.Rodrigues,S.Foro,B.T.Gowda	ACTA CRYSTALLOGR.,SECT.E:STRUCT.REP.ONLINE,2011,67,,o2648	P21/n	hcp/hexagonal closest packing; 12/3/h1
AZUNAL	C14 H13 Cl2 N1 O2 S1/Omega=4.25%(Set #8)	2,4-Dichloro-N-(2,6-dimethylphenyl)benzenesulfonamide.	V.Z.Rodrigues,S.Foro,B.T.Gowda	ACTA CRYSTALLOGR.,SECT.E:STRUCT.REP.ONLINE,2011,67,,o2691	P21/n	fcu/cubic closest packing; 12/3/c1; sqc19
BABBIP	C32 H37 N1 O3 S1/Omega=3.69%(Set #8)	anti-8-t-Butoxy-exo-3,3-diphenyl-2-(p-toluenesulfonamidomethyl)-tricyclo(3.2.1.0^2,4^)octane.	S.F.Pavkovic,P.G.Santangelo	ACTA CRYSTALLOGR.,SECT.B:STRUCT.CRYSTALLOGR.CRYST.CHEM.,1981,37,,1762	P21/c	fcu/cubic closest packing; 12/3/c1; sqc19
BAGBUI	C21 H33 N3 O2 S2/Omega=3.23%(Set #6)	N-(1-(2-(Diethylamino)-1,3-thiazol-5-yl)heptyl)-4-methylbenzenesulfonamide.	L.Albrecht,L.K.Ransborg,A.Albrecht,L.Lykke,K.A.Jorgensen	Chem.-Eur.J.,2011,17,,13240	P212121	fcu/cubic closest packing; 12/3/c1; sqc19
BASYEB	C20 H20 N2 O3 S1/Omega=3.73%(Set #6)	(Z)-4-Methyl-N-(2-((2-oxonaphthalen-1(2H)-ylidene)-methylamino)ethyl)benzenesulfonamide.	G.Alpaslan,M.Macit,A.Erdonmez,O.Buyukgungor	J.MOL.STRUCT.,2012,1016,,22	Pc	12T17
BBSPRT10	C9 H8 Br1 N1 O3 S2/Omega=5.72%(Set #6)	(S)-\a-(p-Bromobenzenesulfonamido)-\b-propiothiolactone.	I.Matijasic,G.D.Andreetti,P.Sgarabotto,A.Bezjak,D.Fles	CROAT.CHEM.ACTA,1984,57,,621	P212121	fcu/cubic closest packing; 12/3/c1; sqc19
BEDMIG02	C10 H13 Cl1 N2 O3 S1/Omega=2.62%(Set #6)	4-chloro-N-(propylaminocarbonyl)benzenesulfonamide.	T.N.Drebushchak,N.V.Chukanov,E.V.Boldyreva	ACTA CRYSTALLOGR.,SECT.C:CRYST.STRUCT.COMMUN.,2007,63,,o355	P21	fcu/cubic closest packing; 12/3/c1; sqc19
BEDMIG03	C10 H13 Cl1 N2 O3 S1/Omega=2.52%(Set #7)	4-Chloro-N-((propylamino)-carbonyl)-benzenesulfonamide.	T.N.Drebushchak,N.V.Chukanov,E.V.Boldyreva	ACTA CRYSTALLOGR.,SECT.C:CRYST.STRUCT.COMMUN.,2008,64,,o623	Pbca	hcp/hexagonal closest packing; 12/3/h1
BEDMIG04	C10 H13 Cl1 N2 O3 S1/Omega=3.79%(Set #6)	4-Chloro-N-((propylamino)-carbonyl)-benzenesulfonamide.	T.N.Drebushchak,N.V.Chukanov,E.V.Boldyreva	ACTA CRYSTALLOGR.,SECT.C:CRYST.STRUCT.COMMUN.,2008,64,,o623	Pna21	fcu/cubic closest packing; 12/3/c1; sqc19
BEDMIG05	C10 H13 Cl1 N2 O3 S1/Omega=2.01%(Set #6)	4-Chloro-N-(propylcarbamoyl)benzenesulfonamide.	T.N.Drebushchak,Y.A.Chesalov,E.V.Boldyreva	ACTA CRYSTALLOGR.,SECT.B:STRUCT.SCI.,2009,65,,770	Pna21	12T18
BEDMIG06	C10 H13 Cl1 N2 O3 S1/Omega=3.59%(Set #6)	4-Chloro-N-(propylcarbamoyl)benzenesulfonamide.	T.N.Drebushchak,Y.A.Chesalov,E.V.Boldyreva	ACTA CRYSTALLOGR.,SECT.B:STRUCT.SCI.,2009,65,,770	Pna21	fcu/cubic closest packing; 12/3/c1; sqc19
BEDMIG07	C10 H13 Cl1 N2 O3 S1/Omega=1.99%(Set #6)	4-Chloro-N-(propylcarbamoyl)benzenesulfonamide.	T.N.Drebushchak,Y.A.Chesalov,E.V.Boldyreva	ACTA CRYSTALLOGR.,SECT.B:STRUCT.SCI.,2009,65,,770	Pna21	12T18
BEDMIG08	C10 H13 Cl1 N2 O3 S1/Omega=2.00%(Set #6)	4-Chloro-N-(propylcarbamoyl)benzenesulfonamide.	T.N.Drebushchak,Y.A.Chesalov,E.V.Boldyreva	ACTA CRYSTALLOGR.,SECT.B:STRUCT.SCI.,2009,65,,770	P212121	12T5
BEDMIG09	C10 H13 Cl1 N2 O3 S1/Omega=1.98%(Set #6)	4-Chloro-N-(propylcarbamoyl)benzenesulfonamide.	T.N.Drebushchak,Y.A.Chesalov,E.V.Boldyreva	ACTA CRYSTALLOGR.,SECT.B:STRUCT.SCI.,2009,65,,770	P212121	12T5
BEDMIG10	C10 H13 Cl1 N2 O3 S1/Omega=1.96%(Set #6)	4-Chloro-N-(propylcarbamoyl)benzenesulfonamide.	T.N.Drebushchak,Y.A.Chesalov,E.V.Boldyreva	ACTA CRYSTALLOGR.,SECT.B:STRUCT.SCI.,2009,65,,770	P212121	12T5
BEGCIZ	C18 H22 N4 O5 S2/Omega=1.84%(Set #9)	N-(2-(2-Methyl-3-(p-nitrobenzyl)-oxy-1-isothioureido)-ethyl)-p-toluenesulfonamide.	Z.Urbanczyk-Lipkowska,J.W.Krajewski,P.Gluzinski,K.Stadnicka	ACTA CRYSTALLOGR.,SECT.B:STRUCT.CRYSTALLOGR.CRYST.CHEM.,1982,38,,971	P-1	bcu-x/ 14-conn;I m -3 m->P -1 (-1/2a+1/2b+1/2c,1/2a-1/2b+1/2c,a+b; 3/4,3/4,1/4);Bond sets: 2,3,4,5,6,7,8,9,11:bcu-x
BEJJEG	C15 H13 Cl2 N1 O2 S1/Omega=3.86%(Set #7)	N-(1-Chloromethyl-2-chloro-2-phenylethenyl)benzenesulfonamide.	S.Karur,S.R.S.S.Kotti,Xin Xu,J.F.Cannon,A.Headley,Guigen Li	J.AM.CHEM.SOC.,2003,125,,13340	Pbca	12T19
BESNUI01	C9 H8 N2 O2 S2/Omega=3.89%(Set #8)	N-(1,3-thiazol-2(3H)-ylidene)benzenesulfonamide.	T.A.Mayer,M.B.Hursthouse,T.L.Threlfall,S.J.Coles	University of Southampton, Crystal Structure Report Archive,2000,,,	P21/n	fcu/cubic closest packing; 12/3/c1; sqc19
BEWKUJ04	C11 H11 N3 O2 S1/Omega=4.99%(Set #8)	4-Amino-N-2-pyridinylbenzenesulfonamide.	A.K.Basak,S.Chaudhuri,S.K.Mazumdar	ACTA CRYSTALLOGR.,SECT.C:CRYST.STRUCT.COMMUN.,1984,40,,1848	C2/c	bcu-x/ 14-conn;I m -3 m->C 2/c (-a+b,-a-b,2c; 1/4,3/4,1/4);Bond sets: 2,4,5,6,7,8,9,10:bcu-x
BEWKUJ11	C11 H11 N3 O2 S1/Omega=3.29%(Set #7)	4-Amino-N-2-pyridinyl-benzenesulfonamide.	I.Bar,J.Bernstein	J.Pharm.Sci.,1985,74,,255	P21/c	12T20
BEWKUJ15	C11 H11 N3 O2 S1/Omega=4.87%(Set #8)	4-amino-N-(1,2-dihydropyridin-2-ylidene)benzenesulfonamide.	J.Pratt,J.Hutchinson,C.L.K.Stevens	ACTA CRYSTALLOGR.,SECT.C:CRYST.STRUCT.COMMUN.,2011,67,,o487	C2/c	bcu-x/ 14-conn;I m -3 m->C 2/c (-a+b,-a-b,2c; 1/4,3/4,1/4);Bond sets: 2,4,5,6,7,8,9,10:bcu-x
BEYFER	C15 H18 N2 O2 S1/Omega=3.06%(Set #6)	N-((S)-2-Amino-2-phenylethyl)-4-methylbenzensulfonamide.	A.Hayes,G.Clarkson,M.Wills	TETRAHEDRON:ASYMM.,2004,15,,2079	P212121	fcu/cubic closest packing; 12/3/c1; sqc19
BIZPIK	C13 H11 Cl1 N2 O3 S1/Omega=2.84%(Set #6)	2-(N-(2-chlorophenyl)carbamoyl)benzenesulfonamide.	W.A.Siddiqui,S.Ahmad,I.U.Khan,H.L.Siddiqui,M.Parvez	ACTA CRYSTALLOGR.,SECT.C:CRYST.STRUCT.COMMUN.,2008,64,,o286	Pna21	12T9
BOVBOE	C14 H19 N3 O2 S1/Omega=5.40%(Set #6)	N-(2-Aminoethyl)-5-(dimethylamino)-1-naphthalenesulfonamide.	Shilei Zhang,Bilin Zhao,Zhenhong Su,Xianyou Xia,Yong Zhang	ACTA CRYSTALLOGR.,SECT.E:STRUCT.REP.ONLINE,2009,65,,o1452	Pna21	12T21
BOVFIC	C15 H15 N5 O4 S1/Omega=3.28%(Set #8)	4-[2-(1-Acetyl-2-oxopropylidene)hydrazino]-N-(pyrimidin-2-yl)benzenesulfonamide.	P.Rai,S.Upadhyay,M.Nethaji,K.K.Upadhyay	ACTA CRYSTALLOGR.,SECT.E:STRUCT.REP.ONLINE,2009,65,,o1397	P21/n	12T22
BPCBZS11	C12 H9 Br1 Cl1 N1 O2 S1/Omega=3.10%(Set #7)	4-Bromo-4'-chlorobenzenesulfonamidobenzene.	T.Gelbrich,M.B.Hursthouse,T.L.Threlfall	ACTA CRYSTALLOGR.,SECT.B:STRUCT.SCI.,2007,63,,621	R-3	12T23
BSPRTL10	C9 H9 N1 O3 S2/Omega=3.35%(Set #6)	(S)-\a-(Benzenesulfonamido)-\b-propiothiolactone.	N.Galesic,M.Galesic,E.Coffou	CROAT.CHEM.ACTA,1977,50,,283	P212121	hcp/hexagonal closest packing; 12/3/h1
BUDYEF	C7 H10 N2 O2 S1/Omega=2.75%(Set #7)	2-Amino-4-methylbenzenesulfonamide.	Shao-Song Qian,Hao Hu,Hong-You Cui	ACTA CRYSTALLOGR.,SECT.E:STRUCT.REP.ONLINE,2009,65,,o2513	P21/c	hcp/hexagonal closest packing; 12/3/h1
BUJPAY	C32 H32 N4 O4 S2/Omega=2.87%(Set #10)	4-Methyl-N-((1-(2-(((4-methylphenyl)sulfonyl)amino)ethyl)-4,5-diphenyl-1H-imidazol-2-yl)methyl)benzenesulfonamide.	Zilu Chen,Jing Miao,Zhong Zhang,Fupei Liang,Qiang Wu	J.ORGANOMET.CHEM.,2010,695,,189	P-1	fcu/cubic closest packing; 12/3/c1; sqc19
CAGPOR	C32 H20 N2 O6 S2/Omega=3.59%(Set #8)	N^1^,N^3^-bis(9-Oxo-9H-fluoren-2-yl)benzene-1,3-disulfonamide.	J.T.Koivunen,L.Nissinen,J.Kapyla,J.Jokinen,M.Pihlavisto,A.Marjamaki,J.Heino,J.Huuskonen,O.T.Pentikainen	J.AM.CHEM.SOC.,2011,133,,14558	P21/c	12T15
CAYNEW	C15 H11 N3 O4 S1/Omega=3.15%(Set #6)	4-Nitro-N-(8-quinolyl)benzenesulfonamide.	L.E.da Silva,A.C.Joussef,S.Foro,B.Schmidt	ACTA CRYSTALLOGR.,SECT.E:STRUCT.REP.ONLINE,2005,61,,o3778	P21	12T24
CAYNOG	C15 H9 Br2 F1 N2 O2 S1/Omega=3.49%(Set #7)	N-(5,7-Dibromo-8-quinolyl)-4-fluorobenzenesulfonamide.	L.E.da Silva,A.C.Joussef,S.Foro,B.Schmidt	ACTA CRYSTALLOGR.,SECT.E:STRUCT.REP.ONLINE,2005,61,,o3782	P21/c	12T25
CAZDAJ	C11 H15 N1 O2 S3/Omega=5.37%(Set #7)	4-Methyl-N-(3-methyl-1,2-dithiolan-4-yl)benzenesulfonamide.	D.Sureshkumar,S.M.Koutha,S.Chandrasekaran	J.AM.CHEM.SOC.,2005,127,,12760	P21/n	hcp/hexagonal closest packing; 12/3/h1
CAZDEN	C12 H17 N1 O2 S2/Omega=2.41%(Set #7)	4-Methyl-N-(3-methyltetrahydro-3-thienyl)benzenesulfonamide.	D.Sureshkumar,S.M.Koutha,S.Chandrasekaran	J.AM.CHEM.SOC.,2005,127,,12760	P21/n	12T25
CAZDIR	C17 H23 N1 O3 S2/Omega=3.19%(Set #6)	N-(4,8-Dimethyl-7-oxo-2-thiabicyclo(3.3.1)non-4-yl)-4-methylbenzenesulfonamide.	D.Sureshkumar,S.M.Koutha,S.Chandrasekaran	J.AM.CHEM.SOC.,2005,127,,12760	P21	fcu/cubic closest packing; 12/3/c1; sqc19
CAZDOX	C13 H17 N1 O3 S3/Omega=3.39%(Set #9)	N-(4-Hydroxy-6,7-dithiabicyclo(3.2.1)oct-2-yl)-4-methylbenzenesulfonamide.	D.Sureshkumar,S.M.Koutha,S.Chandrasekaran	J.AM.CHEM.SOC.,2005,127,,12760	P-1	hcp/hexagonal closest packing; 12/3/h1
CAZFAL	C17 H23 N1 O4 S2/Omega=4.52%(Set #6)	N-(7-Hydroxy-1,4-dimethyl-8-oxo-2-thiabicyclo(3.2.2)non-4-yl)-4-methylbenzenesulfonamide.	D.Sureshkumar,S.M.Koutha,S.Chandrasekaran	J.AM.CHEM.SOC.,2005,127,,12760	P212121	hcp/hexagonal closest packing; 12/3/h1
CAZFIT	C18 H22 N2 O4 S4/Omega=3.33%(Set #6)	N,N'-1,2-Dithiane-4,5-diyl-bis(4-methylbenzenesulfonamide).	D.Sureshkumar,S.M.Koutha,S.Chandrasekaran	J.AM.CHEM.SOC.,2005,127,,12760	P212121	hcp/hexagonal closest packing; 12/3/h1
CEJZEW	C23 H22 N4 O7 S2/Omega=3.21%(Set #6)	5,2'-Anhydro-5-(p-toluenesulfonamido)-1-(3'-O-tosyl-\b-D-arabinofuranosyl)imidazole-4-carbonitrile.	S.Sugio,H.Mizuno,K.Kitamura,M.Ikehara,K.-I.Tomita	ACTA CRYSTALLOGR.,SECT.C:CRYST.STRUCT.COMMUN.,1984,40,,186	P21	bcu-x/ 14-conn;I m -3 m->C m c m (a+b,c,a-b; 1/4,3/4,1/4);Bond sets: 1,3,4,5:bcu-x
CEVBAH	C17 H15 Br2 N3 O3 S1/Omega=1.93%(Set #7)	N-(2,3-dibromo-10-oxo-7,8-dihydro-6H,10H-dipyrrolo[1,2-a:1',2'-d]pyrazin-5-yl)-4-methylbenzenesulfonamide.	M.Zollinger,P.Mayer,T.Lindel	J.ORG.CHEM.,2006,71,,9431	P21/c	bcu-x/ 14-conn;I m -3 m->P 21/c (1/2a+1/2b+1/2c,-a+b,-a-b+c; 1/2,0,0);Bond sets: 1,2,3,5,7,8,9:bcu-x
CEXQOM	C11 H8 Br1 N1 O4 S2/Omega=4.16%(Set #8)	2-(2-bromothiophene-5-sulfonamido)benzoic acid.	Xiao-Wei Yan,Mao-Lin Hu,Jing Xiong	ACTA CRYSTALLOGR.,SECT.E:STRUCT.REP.ONLINE,2007,63,,o678	C2/c	fcu/cubic closest packing; 12/3/c1; sqc19
CICPIO	C7 H8 F1 N1 O2 S1/Omega=4.04%(Set #7)	N-(4-Fluorophenyl)methanesulfonamide.	B.T.Gowda,S.Foro,H.Fuess	ACTA CRYSTALLOGR.,SECT.E:STRUCT.REP.ONLINE,2007,63,,o2570	P21/c	12T25
CICQEL	C7 H8 Br1 N1 O2 S1/Omega=2.98%(Set #8)	N-(4-Bromophenyl)methanesulfonamide.	B.T.Gowda,S.Foro,H.Fuess	ACTA CRYSTALLOGR.,SECT.E:STRUCT.REP.ONLINE,2007,63,,o2597	P21/c	fcu/cubic closest packing; 12/3/c1; sqc19
CIKJAI	C13 H10 Br2 N2 O3 S1/Omega=2.58%(Set #8)	4-(3,5-Dibromo-2-hydroxybenzylideneamino)benzenesulfonamide.	Yu.M.Chumakov,V.I.Tsapkov,G.Bocelli,B.Ya.Antosyak,S.A.Palomares-Sanchez,R.S.Ortiz,A.P.Gulya	Zh.Strukt.Khim.(Russ.)(J.Struct.Chem.),2006,47,,933	P21/n	12T26
CIKJEM	C16 H11 Br2 N3 O3 S2/Omega=3.04%(Set #8)	4-(3,5-Dibromo-2-hydroxybenzylideneamino)-N-(1,3-thiazol-2-yl)benzenesulfonamide.	Yu.M.Chumakov,V.I.Tsapkov,G.Bocelli,B.Ya.Antosyak,S.A.Palomares-Sanchez,R.S.Ortiz,A.P.Gulya	Zh.Strukt.Khim.(Russ.)(J.Struct.Chem.),2006,47,,933	P21/c	12T27
CIMJOX	C22 H24 N2 O7 S2/Omega=2.32%(Set #8)	Ethyl2-methyl-5-oxo-4-(p-toluenesulfonamido)-1-tosyl-2,5-dihydro-pyrrole-2-carboxylate.	L.Dupont,O.Dideberg,J.C.Jamoulle	ACTA CRYSTALLOGR.,SECT.C:CRYST.STRUCT.COMMUN.,1984,40,,1472	P21/c	fcu/cubic closest packing; 12/3/c1; sqc19
CIQHEQ	C15 H13 N1 O4 S1/Omega=4.07%(Set #6)	4-Methyl-N-(3-oxo-1,3-dihydroisobenzofuran-1-yl)benzenesulfonamide.	M.Odabasoglu,O.Buyukgungor	ACTA CRYSTALLOGR.,SECT.E:STRUCT.REP.ONLINE,2007,63,,o4730	Pca21	12T28
CIZBOD01	C19 H18 N2 O2 S1/Omega=4.91%(Set #9)	N-(1-(1H-Pyrrol-2-yl)-2-phenylethylidene)-4-methylbenzenesulfonamide.	R.E.Marsh	ACTA CRYSTALLOGR.,SECT.B:STRUCT.SCI.,2009,65,,782	P-1	fcu/cubic closest packing; 12/3/c1; sqc19
COTJIF	C22 H28 N4 O3 S2/Omega=3.55%(Set #9)	N-((2-(2-(Diethylamino)ethyl)-9-methoxy-2H-thiochromeno(4,3,2-cd)indazol-5-yl)methyl)methanesulfonamide.	M.J.Heeg	PRIVATE COMMUNICATION,2009,,,	P-1	12T29
COYVER	C8 H8 N4 O2 S2/Omega=3.59%(Set #8)	2-(5-Amino-1,3,4-thiadiazol-2-yl)-benzenesulfonamide.	E.Foresti,L.Riva di Sanseverino,P.Sabatino	ACTA CRYSTALLOGR.,SECT.C:CRYST.STRUCT.COMMUN.,1985,41,,240	P21/n	hcp/hexagonal closest packing; 12/3/h1
CUDDEL	C13 H11 Br1 N2 O3 S1/Omega=2.54%(Set #6)	4-[(E)-(5-Bromo-2-hydroxyphenyl)methylideneamino]benzenesulfonamide.	Z.H.Chohan,H.A.Shad,M.N.Tahir	ACTA CRYSTALLOGR.,SECT.E:STRUCT.REP.ONLINE,2009,65,,o2426	P21	12T11
CUGXAE	C29 H27 N3 O2 S3/Omega=4.04%(Set #6)	anti-N-(1-(4-(Dicyanomethylene)-3,4-dihydro-2H-thiochromen-3-yl)-3-(phenylsulfanyl)propyl)-2,4-dimethylbenzenesulfonamide.	Xiao-Feng Xiong,Zhi-Jun Jia,Wei Du,Kun Jiang,Tian-Yu Liu,Ying-Chun Chen	CHEM.COMMUN.,2009,,,6994	P212121	hcp/hexagonal closest packing; 12/3/h1
CUGXEI	C29 H27 N3 O2 S3/Omega=2.31%(Set #6)	syn-N-(1-(4-(Dicyanomethylene)-3,4-dihydro-2H-thiochromen-3-yl)-3-(phenylsulfanyl)propyl)-2,4-dimethylbenzenesulfonamide.	Xiao-Feng Xiong,Zhi-Jun Jia,Wei Du,Kun Jiang,Tian-Yu Liu,Ying-Chun Chen	CHEM.COMMUN.,2009,,,6994	P21	fcu/cubic closest packing; 12/3/c1; sqc19
CURPIP	C26 H26 Br1 N3 O2 S1/Omega=2.97%(Set #6)	4-Bromo-N-(2-(4-phenylpiperazin-1-yl)-1,2-dihydronaphthalen-1-yl)benzenesulfonamide.	Yong-hwan Cho,V.Zunic,H.Senboku,M.Olsen,M.Lautens	J.AM.CHEM.SOC.,2006,128,,6837	P21	fcu/cubic closest packing; 12/3/c1; sqc19
CUTWEU	C28 H23 N1 O3 S1/Omega=0.56%(Set #10)	4-Methyl-N-(2-(3-oxo-1,3-diphenylprop-1-en-1-yl)phenyl)benzenesulfonamide.	P.Kothandaraman,Weidong Rao,Shi Jia Foo,P.W.H.Chan	Angew.Chem.,Int.Ed.,2010,49,,4619	P-1	fcu/cubic closest packing; 12/3/c1; sqc19
CYSPTL10	C10 H8 N2 O3 S2/Omega=2.72%(Set #6)	(S)-\a-(p-Cyanobenzenesulfonamide)-\b-propiothiolactone.	I.Matijasic,G.D.Andreetti,P.Sgarabotto,A.Bezjak,D.Fles	CROAT.CHEM.ACTA,1987,60,,285	P21	hcp/hexagonal closest packing; 12/3/h1
DACBEQ	C26 H24 N2 O5 S1/Omega=3.31%(Set #9)	N-(2-((1,3-Dioxo-1,3-dihydro-2H-isoindol-2-yl)methyl)-3-oxo-1-phenylbutyl)-4-methylbenzenesulfonamide.	Siang-en Syu,Yu-Ting Lee,Yeong-Jiunn Jang,Wenwei Lin	J.ORG.CHEM.,2011,76,,2888	P-1	fcu/cubic closest packing; 12/3/c1; sqc19
DACCOB	C22 H23 Br1 N2 O5 S1/Omega=3.05%(Set #9)	N-(1-(4-Bromophenyl)-2-((2,5-dioxopyrrolidin-1-yl)methyl)-3-oxobutyl)-4-methylbenzenesulfonamide.	Siang-en Syu,Yu-Ting Lee,Yeong-Jiunn Jang,Wenwei Lin	J.ORG.CHEM.,2011,76,,2888	P-1	fcu/cubic closest packing; 12/3/c1; sqc19
DACCUH	C26 H23 N3 O7 S1/Omega=4.15%(Set #9)	N-(2-((1,3-Dioxo-1,3-dihydro-2H-isoindol-2-yl)methyl)-1-(4-nitrophenyl)-3-oxobutyl)-4-methylbenzenesulfonamide.	Siang-en Syu,Yu-Ting Lee,Yeong-Jiunn Jang,Wenwei Lin	J.ORG.CHEM.,2011,76,,2888	P-1	hcp/hexagonal closest packing; 12/3/h1
DAMRAL	C41 H44 N4 O6 S2/Omega=3.18%(Set #8)	1,7-(bis(6-Methoxy-8-(4-toluenesulfonamido)quinol-2-yl))heptane.	M.C.Kimber,S.F.Lincoln,A.D.Ward,E.R.T.Tiekink	Z.KRISTALLOGR.-NEW CRYST.STRUCT.,2004,219,,216	P21/c	12T30
DAYWUW	C16 H17 N1 O4 S1/Omega=2.79%(Set #8)	N-(4-(Ethoxycarbonyl)phenyl)-p-tolylsulfonamide.	Jun-De Xing,Zhi-Hong Nan	ACTA CRYSTALLOGR.,SECT.E:STRUCT.REP.ONLINE,2005,61,,o4320	P21/n	bcu-x/ 14-conn;I m -3 m->C m c m (a-b,a+b,c; 1/4,1/4,1/4);Bond sets: 2,3,4,5:bcu-x
DEFKOP	C30 H28 Br1 N1 O3 S3/Omega=2.52%(Set #9)	S-Phenyl2-((4-bromophenyl)(4-methylphenylsulfonamido)methyl)-3-(phenylthio)butanthioate.	Yong-Lin Shi,Min Shi	TETRAHEDRON,2006,62,,461	P-1	bcu-x/ 14-conn;I m -3 m->C m c m (a-b,a+b,c; 1/4,1/4,1/4);Bond sets: 2,3,4,5:bcu-x
DERTEA	C10 H11 N1 O2 S1/Omega=4.22%(Set #6)	4-Methyl-N-(prop-2-ynyl)benzenesulfonamide.	A.S.K.Hashmi,J.P.Weyrauch,E.Kurpejovic,T.M.Frost,B.Miehlich,W.Frey,J.W.Bats	Chem.-Eur.J.,2006,12,,5806	P212121	12T31
DERTOK	C13 H15 N1 O3 S1/Omega=2.80%(Set #6)	4-Methyl-N-((5-methylfuran-2-yl)methyl)benzenesulfonamide.	A.S.K.Hashmi,J.P.Weyrauch,E.Kurpejovic,T.M.Frost,B.Miehlich,W.Frey,J.W.Bats	Chem.-Eur.J.,2006,12,,5806	P21	12T11
DIBBUL	C17 H14 F3 N3 O2 S1/Omega=2.87%(Set #10)	4-(5-(4-Methylphenyl)-3-(trifluoromethyl)-1H-pyazol-1-yl)benezenesulfonamide.	R.V.Dev,K.S.Rekha,K.Vyas,S.B.Mohanti,P.R.Kumar,G.O.Reddy	ACTA CRYSTALLOGR.,SECT.C:CRYST.STRUCT.COMMUN.,1999,55,,9900161	P-1	12T32
DIFFUU	C19 H23 N1 O2 S2/Omega=3.72%(Set #6)	(S,S)-N-(2-Phenylthiocyclohexyl)-p-toluenesulfonamide.	Zhi-Bin Luo,Xue-Long Hou,Li-Xin Dai	TETRAHEDRON:ASYMM.,2007,18,,443	P212121	hcp/hexagonal closest packing; 12/3/h1
DILHAI	C14 H15 N1 O2 S1/Omega=2.20%(Set #8)	N-(2,4-Dimethylphenyl)benzenesulfonamide.	Jun Chang,Tie-Jun Zhang,Chang-Xiao Liu,Xue-Ming Zhao	ACTA CRYSTALLOGR.,SECT.E:STRUCT.REP.ONLINE,2007,63,,o3670	P21/n	fcu/cubic closest packing; 12/3/c1; sqc19
DIWTEJ	C19 H18 N2 O4 S2/Omega=3.85%(Set #8)	2-Amino-N-(4-methylphenylsulfonyl)-N-phenylbenzenesulfonamide.	Zu-Wei Song	ACTA CRYSTALLOGR.,SECT.E:STRUCT.REP.ONLINE,2008,64,,o744	P21/c	fcu/cubic closest packing; 12/3/c1; sqc19
DOGPIZ	C21 H22 N2 O4 S2/Omega=4.98%(Set #6)	(-)-(2R,3R,4R)-2-Hydroxy-3-methyl-N,4-diphenyl-4-(thiophene-2-sulfonamido)butanamide.	Gang Lu,H.Morimoto,S.Matsunaga,M.Shibasaki	Angew.Chem.,Int.Ed.,2008,47,,6847	P212121	hcp/hexagonal closest packing; 12/3/h1
DUCVED	C6 H6 Cl1 N1 O2 S1/Omega=5.39%(Set #6)	2-Chlorobenzenesulfonamide.	B.T.Gowda,S.Foro,K.Shakuntala,H.Fuess	ACTA CRYSTALLOGR.,SECT.E:STRUCT.REP.ONLINE,2009,65,,o2144	Cc	hcp/hexagonal closest packing; 12/3/h1
DUJKAV	C13 H10 Cl1 N1 O3 S1/Omega=4.69%(Set #9)	N-(4-Chlorobenzoyl)benzenesulfonamide.	P.A.Suchetan,B.T.Gowda,S.Foro,H.Fuess	ACTA CRYSTALLOGR.,SECT.E:STRUCT.REP.ONLINE,2009,65,,o3156	P-1	bcu-x/ 14-conn;I m -3 m->P 21/c (1/2a+1/2b+1/2c,2a-2b,-c; 1/2,0,1/2);Bond sets: 1,2,4,5,7,8,9:bcu-x
DUJSUX	C16 H19 N1 O2 S1/Omega=2.41%(Set #8)	N-(3,5-Dimethylphenyl)-2,4-dimethylbenzenesulfonamide.	B.T.Gowda,S.Foro,P.G.Nirmala,H.Fuess	ACTA CRYSTALLOGR.,SECT.E:STRUCT.REP.ONLINE,2009,65,,o3275	C2/c	12T33
DUMQEI	C13 H12 Cl1 N1 O2 S1/Omega=3.75%(Set #8)	N-(3-Chlorophenyl)-4-methylbenzenesulfonamide.	B.T.Gowda,S.Foro,P.G.Nirmala,H.Fuess	ACTA CRYSTALLOGR.,SECT.E:STRUCT.REP.ONLINE,2010,66,,o278	P21/c	bcu-x/ 14-conn;I m -3 m->C m c m (a-b,a+b,c; 1/4,1/4,1/4);Bond sets: 2,3,4,5:bcu-x
DUMVAJ	C15 H16 N2 O5 S2/Omega=3.15%(Set #8)	N-[4-(p-Toluenesulfonamido)phenylsulfonyl]acetamide.	M.Ashfaq,I.U.Khan,M.N.Arshad,H.Ahmad,M.N.Asghar	ACTA CRYSTALLOGR.,SECT.E:STRUCT.REP.ONLINE,2010,66,,o299	P21/n	hcp/hexagonal closest packing; 12/3/h1
DUNLEE	C11 H11 Cl1 N4 O3 S1/Omega=3.23%(Set #7)	4-Amino-N-(6-chloro-5-methoxypyrimidin-4-yl)benzenesulfonamide.	H.-K.Fun,J.H.Goh,C.S.C.Kumar,H.S.Yathirajan,B.Narayana	ACTA CRYSTALLOGR.,SECT.E:STRUCT.REP.ONLINE,2010,66,,o372	P21/c	ild; sqc15
DUNYAN	C15 H15 N1 O3 S1/Omega=2.41%(Set #9)	2-Methyl-N-(3-methylbenzoyl)benzenesulfonamide.	B.T.Gowda,S.Foro,P.A.Suchetan,H.Fuess	ACTA CRYSTALLOGR.,SECT.E:STRUCT.REP.ONLINE,2010,66,,o433	C2/c	bcu-x/ 14-conn;I m -3 m->P 42/n m c (a,b,2c; 1/4,1/4,1/4);Bond sets: 1,2,4,5:bcu-x
DUSSOA	C14 H15 N1 O2 S1/Omega=3.58%(Set #8)	N-(3,4-Dimethylphenyl)benzenesulfonamide.	P.John,S.Sharif,I.U.Khan,S.Khizar,E.R.T.Tiekink	ACTA CRYSTALLOGR.,SECT.E:STRUCT.REP.ONLINE,2010,66,,o1983	C2/c	bcu-x/ 14-conn;I m -3 m->C m c m (a-b,a+b,c; 1/4,1/4,1/4);Bond sets: 2,3,4,5:bcu-x
DUSTOB	C12 H16 Br1 N1 O2 S1/Omega=4.01%(Set #7)	4-Bromo-N-cyclohexylbenzenesulfonamide.	P.John,F.Anwar,I.U.Khan,S.Sharif,E.R.T.Tiekink	ACTA CRYSTALLOGR.,SECT.E:STRUCT.REP.ONLINE,2010,66,,o1989	P21/c	12T25
DUSWUK	C13 H11 Cl2 N1 O2 S1/Omega=2.53%(Set #7)	4-Chloro-N-(4-chlorophenyl)-2-methylbenzenesulfonamide.	B.T.Gowda,S.Foro,P.G.Nirmala,H.Fuess	ACTA CRYSTALLOGR.,SECT.E:STRUCT.REP.ONLINE,2010,66,,o2000	P21/c	bcu-x/ 14-conn;I m -3 m->C m c m (a-b,a+b,c; 1/4,1/4,1/4);Bond sets: 2,3,4,5:bcu-x
EDESEM	C9 H13 N1 O2 S1/Omega=4.00%(Set #6)	N-(2,3-Dimethylphenyl)methanesulfonamide.	B.T.Gowda,S.Foro,H.Fuess	ACTA CRYSTALLOGR.,SECT.E:STRUCT.REP.ONLINE,2007,63,,o3014	P212121	12T11
EDESIQ	C9 H13 N1 O2 S1/Omega=1.84%(Set #8)	N-(2,4-Dimethylphenyl)methanesulfonamide.	B.T.Gowda,S.Foro,H.Fuess	ACTA CRYSTALLOGR.,SECT.E:STRUCT.REP.ONLINE,2007,63,,o3015	P21/n	fcu/cubic closest packing; 12/3/c1; sqc19
EFAWUD	C12 H12 N2 O3 S1/Omega=4.53%(Set #7)	N-(3-phenoxy-4-pyridinio)methanesulfonamidate.	C.Michaux,C.Charlier,F.Julemont,J.-M.Dogne,X.de Leval,B.Norberg,B.Pirotte,F.Durant	ACTA CRYSTALLOGR.,SECT.C:CRYST.STRUCT.COMMUN.,2002,58,,o88	Pbca	12T34
EGOXED	C21 H22 Cl1 N3 O6 S1/Omega=1.74%(Set #8)	4-Chloro-N-(2-(3-(4-methoxyphenyl)-5-methyl-4,6-dioxo-hexahydro-pyrrolo(3,4-d)isoxazol-2-yl)ethyl)benzenesulfonamide.	H.A.Dondas,J.E.Cummins,R.Grigg,M.Thornton-Pett	TETRAHEDRON,2001,57,,7951	P21/n	12T35
EHEGUU	C16 H16 N2 O3 S1/Omega=2.15%(Set #6)	N-(2,3,8,8a-Tetrahydro-3aH-furo[2,3-b]indol-3a-yl)benzenesulfonamide.	T.Benkovics,I.A.Guzei,T.P.Yoon	Angew.Chem.,Int.Ed.,2010,49,,9153	P21	hcp/hexagonal closest packing; 12/3/h1
ERODEV	C16 H17 N3 O3 S1/Omega=3.25%(Set #8)	N-(7-Ethoxy-1H-indazol-4-yl)-4-methylbenzenesulfonamide.	N.Abbassi,E.M.Rakib,H.Zouihri	ACTA CRYSTALLOGR.,SECT.E:STRUCT.REP.ONLINE,2011,67,,o1354	P21/c	12T12
EROMII	C14 H14 Cl1 N1 O2 S1/Omega=3.90%(Set #6)	4-Chloro-N-(2,6-dimethylphenyl)benzenesulfonamide.	K.Shakuntala,S.Foro,B.T.Gowda	ACTA CRYSTALLOGR.,SECT.E:STRUCT.REP.ONLINE,2011,67,,o1401	P212121	hcp/hexagonal closest packing; 12/3/h1
ETABUW	C16 H10 F9 N3 O3 S1/Omega=1.37%(Set #10)	(N-((E)-2-(4-Hydroxyphenyl)diazenyl)phenyl)-1-perfluorobutanesulfonamide.	X.A.Mico,M.Richter,S.Schwarz,J.Strahle,T.Ziegler,L.R.Subramanian	Z.KRISTALLOGR.-NEW CRYST.STRUCT.,2003,218,,547	P-1	fcu/cubic closest packing; 12/3/c1; sqc19
ETONAC	C13 H13 N1 O3 S1/Omega=4.26%(Set #6)	N-Methyl-2-phenoxybenzenesulfonamide.	C.Glidewell,J.N.Low,J.M.S.Skakle,J.L.Wardell	ACTA CRYSTALLOGR.,SECT.C:CRYST.STRUCT.COMMUN.,2004,60,,o364	P21	fcu/cubic closest packing; 12/3/c1; sqc19
EVEJOF	C15 H18 N2 O4 S2/Omega=2.44%(Set #7)	N-[3-(Benzenesulfonamido)propyl]benzenesulfonamide.	T.A.Sheikh,I.U.Khan,W.T.A.Harrison,Ejaz	ACTA CRYSTALLOGR.,SECT.E:STRUCT.REP.ONLINE,2011,67,,o1737	Pbca	hcp/hexagonal closest packing; 12/3/h1
EVOJAB	C14 H14 Cl1 N1 O2 S1/Omega=4.53%(Set #8)	N-(3-Chlorophenyl)-2,4-dimethylbenzenesulfonamide.	K.Shakuntala,S.Foro,B.T.Gowda	ACTA CRYSTALLOGR.,SECT.E:STRUCT.REP.ONLINE,2011,67,,o2178	P21/c	fcu/cubic closest packing; 12/3/c1; sqc19
EWUHAF	C8 H8 F3 N3 O4 S2/Omega=4.21%(Set #6)	3,4-Dihydro-6-(trifluoromethyl)-2H-1,2,4-benzothiadiazine-7-sulfonamide1,1-dioxide.	A.J.Florence,B.Baumgartner,C.Weston,N.Shankland,A.R.Kennedy,K.Shankland,W.I.F.David	J.Pharm.Sci.,2003,92,,1930	P21	hcp/hexagonal closest packing; 12/3/h1
EXALUK	C15 H12 Br1 N1 O2 S1/Omega=4.19%(Set #6)	4-Bromo-N-(3-phenylprop-2-ynyl)benzenesulfonamide.	A.S.K.Hashmi,P.Haufe,A.R.Nass,J.W.Bats	ADV.SYNTH.CATAL.,2004,346,,421	Cc	12T15
EZALIB	C29 H33 Br1 N2 O4 S1/Omega=2.78%(Set #9)	N-(1-(2-Bromo-4,5-dimethoxyphenyl)-1-cyano-2-phenylheptan-3-yl)-4-methylbenzenesulfonamide.	M.K.Ghorai,Y.Nanaji,A.K.Yadav	Org.Lett.,2011,13,,4256	P-1	hcp/hexagonal closest packing; 12/3/h1
EZATUV	C30 H23 N3 O2 S1/Omega=3.80%(Set #9)	N-(1,5-Diphenylpyrazolo[5,1-a]isoquinolin-2-yl)-4-methylbenzenesulfonamide.	Shaoyu Li,Yong Luo,Jie Wu	Org.Lett.,2011,13,,4312	P-1	bcu-x/ 14-conn;I m -3 m->P 21/c (1/2a+1/2b+1/2c,2a-2b,-c; 1/2,0,1/2);Bond sets: 1,2,4,5,7,8,9:bcu-x
EZEVIP	C29 H24 N2 O2 S1/Omega=3.12%(Set #9)	5-(Dimethylamino)-N-(pyren-1-ylmethyl)naphthalene-1-sulfonamide.	V.Chandrasekhar,M.D.Pandey,S.K.Maurya,P.Sen,D.Goswami	Chem.Asian J.,2011,6,,2246	C2/c	bcu-x/ 14-conn;I m -3 m->C 2/c (2c,2b,-a-c; 1/4,3/4,3/4);Bond sets: 1,3,4,5,6,8,9,10,11:bcu-x
FAMZOJ	C12 H21 N1 O6 S2/Omega=2.29%(Set #7)	syn-6-Methanesulfonamido-3-methyl-2-oxa-1-adamantyl methanesulfonate.	P.Camps,E.Gomez,D.Munoz-Torrero,M.Font-Bardia,X.Solans	TETRAHEDRON,2003,59,,4143	Pbca	12T37
FAVBEK	C25 H22 Cl2 N2 O5 S1/Omega=2.98%(Set #6)	N-(2-chloro-2-(2-chlorophenyl)-1-[(2-oxo-4-phenyl-1,3-oxazolidin-3-yl)carbonyl]ethyl)-4-methylbenzenesulfonamide.	Xin Xu,S.R.S.S.Kotti,Junying Liu,J.F.Cannon,A.D.Headley,Guigen Li	Org.Lett.,2004,6,,4881	P21	fcu/cubic closest packing; 12/3/c1; sqc19
FAWFOA	C31 H36 N2 O4 S1/Omega=3.29%(Set #6)	N-(1-(4-Isobutyl-2-(2-naphthyl)-5-oxo-4,5-dihydro-1,3-oxazol-4-yl)pent-4-en-1-yl)-4-isopropylbenzenesulfonamide.	Wen-Quan Zhang,Ling-Feng Cheng,Jie Yu,Liu-Zhu Gong	Angew.Chem.,Int.Ed.,2012,51,,4085	P212121	12T5
FAXBUB01	C13 H13 N1 O2 S1/Omega=2.58%(Set #8)	4-Methyl-N-phenylbenzenesulfonamide.	B.T.Gowda,S.Foro,P.G.Nirmala,H.Terao,H.Fuess	ACTA CRYSTALLOGR.,SECT.E:STRUCT.REP.ONLINE,2009,65,,o1219	P21/c	hcp/hexagonal closest packing; 12/3/h1
FAXZIO	C16 H14 N2 O3 S1/Omega=3.39%(Set #7)	4-(5-Methyl-3-phenylisoxazol-4-yl)benzenesulfonamide.	S.M.M.Sony,P.Charles,M.N.Ponnuswamy,H.S.Yathirajan	ACTA CRYSTALLOGR.,SECT.E:STRUCT.REP.ONLINE,2005,61,,o108	Pbca	bcu-x/ 14-conn;I m -3 m->I b c a (a+b,c,2a-2b; 3/4,1/4,1/4);Bond sets: 1,2,3,5,6:bcu-x
FIRGOD	C7 H8 Cl1 N1 O2 S1/Omega=3.06%(Set #8)	p-chloroaniline N-methanesulfonamide.	J.R.Hanson,P.B.Hitchcock	J.CHEM.RES.,2004,,,642	P21/c	fcu/cubic closest packing; 12/3/c1; sqc19
FIRHAQ	C9 H13 N1 O2 S1/Omega=1.97%(Set #8)	2,5-Dimethylaniline N-methanesulfonamide.	J.R.Hanson,P.B.Hitchcock	J.CHEM.RES.,2004,,,642	P21/c	fcu/cubic closest packing; 12/3/c1; sqc19
FIRHEU	C9 H13 N1 O2 S1/Omega=4.69%(Set #6)	2,6-Dimethylaniline N-methanesulfonamide.	J.R.Hanson,P.B.Hitchcock	J.CHEM.RES.,2004,,,642	P212121	hcp/hexagonal closest packing; 12/3/h1
FIRHUK	C9 H11 N3 O6 S1/Omega=5.26%(Set #7)	2,6-Dinitro-3,4-dimethylaniline N-methanesulfonamide.	J.R.Hanson,P.B.Hitchcock	J.CHEM.RES.,2004,,,642	P21/n	bcu-x/ 14-conn;I m -3 m->P 21/c (1/2a+1/2b+1/2c,-a+b,-a-b+c; 1/2,0,0);Bond sets: 1,2,3,5,7,8,9:bcu-x
FIRJAS	C9 H12 N2 O3 S1/Omega=1.73%(Set #6)	4-Aminoacetanilide N-methanesulfonamide.	J.R.Hanson,P.B.Hitchcock	J.CHEM.RES.,2004,,,642	P212121	hcp/hexagonal closest packing; 12/3/h1
FIZTUE	C10 H14 F6 N2 O5 S2/Omega=4.52%(Set #6)	(1S,2S)-N-acetyl-1,2-bis(trifluoromethanesulfonamide)cyclohexane.	S.Arseniyadis,A.Valleix,A.Wagner,C.Mioskowski	Angew.Chem.,Int.Ed.,2004,43,,3314	P212121	fcu/cubic closest packing; 12/3/c1; sqc19
FOMZOX	C10 H9 Cl1 N4 O2 S1/Omega=4.48%(Set #7)	4-Amino-N-(6-chloropyridazin-3-yl)benzenesulfonamide.	Yan-Shu Tan,Zhen-Feng Chen,Hong Liang,Yong Zhang	ACTA CRYSTALLOGR.,SECT.E:STRUCT.REP.ONLINE,2005,61,,o1842	P21/n	bcu-x/ 14-conn;I m -3 m->P 21/c (1/2a+1/2b+1/2c,-a+b,-a-b+c; 1/2,0,0);Bond sets: 1,2,3,5,7,8,9:bcu-x
FOXCOL	C14 H13 Cl2 N1 O2 S1/Omega=3.12%(Set #7)	N-(3,4-Dichlorophenyl)-2,4-dimethylbenzenesulfonamide.	B.T.Gowda,S.Foro,P.G.Nirmala,H.Fuess	ACTA CRYSTALLOGR.,SECT.E:STRUCT.REP.ONLINE,2009,65,,o1976	P21/c	bcu-x/ 14-conn;I m -3 m->C m c m (a-b,a+b,c; 1/4,1/4,1/4);Bond sets: 2,3,4,5:bcu-x
FUQWIY	C19 H31 N1 O7 S1 Si1/Omega=2.36%(Set #7)	N-(1-(3,4-Dihydroxy-5-oxotetrahydro-2-furanyl)-2-(dimethyl-t-butylsiloxy)ethyl)-4-methylbenzenesulfonamide.	J.Robertson,E.Abdulmalek	TETRAHEDRON LETT.,2009,50,,3516	P21/c	bcu-x/ 14-conn;I m -3 m->P 21/c (1/2a+1/2b+1/2c,-a+b,-a-b+c; 1/2,0,0);Bond sets: 1,2,3,5,7,8,9:bcu-x
FUZRAU	C17 H23 N1 O2 S2/Omega=1.60%(Set #6)	N-Benzyl-1-(7,7-dimethyl-2-thioxobicyclo[2.2.1]hept-1-yl)methanesulfonamide.	A.Kozakiewicz,M.Ullrich,M.Weniak,A.Wojtczak	J.Mol.Catal.A:Chem.,2010,326,,128	P212121	fcu/cubic closest packing; 12/3/c1; sqc19
GABCIX	C24 H20 Br1 N1 O3 S1/Omega=4.77%(Set #6)	N-((4-Bromophenyl)(2-hydroxy-1-naphthyl)methyl)-4-methylbenzenesulfonamide.	Liang-Feng Niu,Yang-Chun Xin,Ren-Lin Wang,Fan Jiang,Peng-Fei Xu,Xin-Ping Hui	SYNLETT,2010,,,765	P212121	12T11
GACBOD	C15 H23 N1 O3 S1/Omega=2.43%(Set #10)	N-(2-(4-Hydroxybut-2-en-1-yl)-3-methylphenyl)-2-methylpropane-2-sulfonamide.	H.Yamamoto,E.Ho,K.Namba,H.Imagawa,M.Nishizawa	Chem.-Eur.J.,2010,16,,11271	P-1	12T15
GACYAM	C20 H25 N3 O5 S1/Omega=1.98%(Set #6)	N-[(4R)-4-(4-Methoxyphenyl)-3-[2-(4-methoxyphenyl)ethyl]-2-oxo-imidazolidin-1-yl]methanesulfonamide.	B.E.Blass,A.Fensome,E.Trybulski,R.Magolda,S.J.Gardell,Kun Liu,M.Samuel,I.Feingold,C.Huselton,C.M.Jackson,L.Djandjighian,D.Ho,J.Hennan,J.M.Janusz	J.Med.Chem.,2009,52,,6531	P21	12T11
GALMEM	C26 H16 Cl2 N2 O5 S1/Omega=1.48%(Set #10)	3',6'-Dichloro-3-oxo-N-(2-pyridylmethyl)-3H-spiro(2-benzofuran-1,9'-xanthene)-6-sulfonamide.	C.C.Woodroofe,Mi Hee Lim,Weiming Bu,S.J.Lippard	TETRAHEDRON,2005,61,,3097	P-1	12T15
GAPJUE	C13 H9 Cl1 N2 O5 S1/Omega=3.19%(Set #7)	N-(2-Chlorobenzoyl)-2-nitrobenzenesulfonamide.	P.A.Suchetan,S.Foro,B.T.Gowda	ACTA CRYSTALLOGR.,SECT.E:STRUCT.REP.ONLINE,2012,68,,o274	Pbca	hcp/hexagonal closest packing; 12/3/h1
GAPVUQ	C13 H10 N2 O5 S1/Omega=3.76%(Set #7)	N-Benzoyl-2-nitrobenzenesulfonamide.	P.A.Suchetan,S.Foro,B.T.Gowda,B.Nirmala	ACTA CRYSTALLOGR.,SECT.E:STRUCT.REP.ONLINE,2012,68,,o339	Pbca	12T38
GAQQAS	C15 H21 N3 O3 S1/Omega=3.13%(Set #7)	N-(Hexahydrocyclopenta[c]pyrrol-2(1H)-ylcarbamoyl)-2-methylbenzenesulfonamide.	Di Wu,Xueyuan Wang,Dongying Pang,Wei Su,Yan Sun	ACTA CRYSTALLOGR.,SECT.E:STRUCT.REP.ONLINE,2012,68,,o446	P21/c	ild; sqc15
GAQTOJ	C12 H16 Cl1 N1 O2 S1/Omega=4.10%(Set #7)	4-Chloro-N-cyclohexylbenzenesulfonamide.	S.Sharif,S.Y.Mughal,I.U.Khan,M.Akkurt,M.H.Khan	ACTA CRYSTALLOGR.,SECT.E:STRUCT.REP.ONLINE,2012,68,,o468	P21/c	12T25
GEJJOV	C11 H10 Cl1 N3 O2 S1/Omega=4.55%(Set #8)	N-(6-Chloropyridazin-3-yl)-4-methylbenzenesulfonamide.	Hoong-Kun Fun,Shu-Feng Zhang,Zhen-Feng Chen,Hong Liang,S.Chantrapromma	ACTA CRYSTALLOGR.,SECT.E:STRUCT.REP.ONLINE,2006,62,,o2178	C2/c	fcu/cubic closest packing; 12/3/c1; sqc19
GERCAH	C12 H21 N3 O3 S1/Omega=4.54%(Set #10)	(3-(N-Diethylaminoethyl)sulfonamido-S)-4-methoxypyridine.	M.Sbit,L.Dupont,O.Dideberg,J.F.Liegeois,J.Delarge	ACTA CRYSTALLOGR.,SECT.C:CRYST.STRUCT.COMMUN.,1988,44,,907	P-1	fcu/cubic closest packing; 12/3/c1; sqc19
GEWXIP	C16 H18 Cl1 N1 O2 S1/Omega=3.91%(Set #6)	N-((-)-1R,2R-1-Chloro-1-phenyl-2-propyl)-p-toluenesulfonamide.	A.Flores-Parra,P.Suarez-Moreno,S.A.Sanchez-Ruiz,M.Tlahuextl,J.Jaen-Gaspar,H.Tlahuext,R.Salas-Coronado,A.Cruz,H.Noth,R.Contreras	TETRAHEDRON:ASYMM.,1998,9,,1661	P21	ild; sqc15
GEWXUB	C17 H21 N1 O3 S1/Omega=3.79%(Set #6)	N-((+)-1S,2S-1-Hydroxy-1-phenyl-2-propyl)-N-methyl-p-toluenesulfonamide.	A.Flores-Parra,P.Suarez-Moreno,S.A.Sanchez-Ruiz,M.Tlahuextl,J.Jaen-Gaspar,H.Tlahuext,R.Salas-Coronado,A.Cruz,H.Noth,R.Contreras	TETRAHEDRON:ASYMM.,1998,9,,1661	P21	hcp/hexagonal closest packing; 12/3/h1
GEWZIR	C16 H19 N1 O3 S1/Omega=2.92%(Set #8)	N((+)-1S,2R-1-Hydroxy-1-phenyl-2-propyl)-p-toluenesulfonamide.	A.Flores-Parra,P.Suarez-Moreno,S.A.Sanchez-Ruiz,M.Tlahuextl,J.Jaen-Gaspar,H.Tlahuext,R.Salas-Coronado,A.Cruz,H.Noth,R.Contreras	TETRAHEDRON:ASYMM.,1998,9,,1661	P21/c	12T40
GEXCAN	C16 H18 Cl1 N1 O2 S1/Omega=5.81%(Set #6)	N-((+)-1R,2R-1-Chloro-1-phenyl-2-propyl)-p-toluenesulfonamide.	A.Flores-Parra,P.Suarez-Moreno,S.A.Sanchez-Ruiz,M.Tlahuextl,J.Jaen-Gaspar,H.Tlahuext,R.Salas-Coronado,A.Cruz,H.Noth,R.Contreras	TETRAHEDRON:ASYMM.,1998,9,,1661	P21	fcu/cubic closest packing; 12/3/c1; sqc19
GILWII	C18 H19 N1 O4 S1/Omega=3.38%(Set #9)	anti-N-(3-acetyl-3,4-dihydro-2H-chromen-4-yl)-4-methylbenzenesulfonamide.	Ming-Juan Qi,Min Shi	TETRAHEDRON,2007,63,,10415	C2/c	fcu/cubic closest packing; 12/3/c1; sqc19
GIQRUT	C21 H33 N5 O4 S1/Omega=2.50%(Set #7)	1-Cyclohexylamino-1-((4'-cyclo-octylamino)pyrid-3'-ylsulfonamido)-2-nitroethylene.	B.Masereel,J.Wouters,L.Pochet,D.Lambert	J.Med.Chem.,1998,41,,3239	P21/c	fcu/cubic closest packing; 12/3/c1; sqc19
GOLDUH	C17 H16 N2 O4 S2/Omega=3.49%(Set #7)	Ethyl 3-(4-methylbenzenesulfonamido)thieno(2,3-b)pyridine-2-carboxylate.	Wen-qin Zhang,Ren-lin Zheng,Hang Song,Sheng-Yong Yang,Luo-Ting Yu	ACTA CRYSTALLOGR.,SECT.E:STRUCT.REP.ONLINE,2009,65,,o257	Pbca	12T41
GUFQED01	C15 H25 N1 O2 S1/Omega=4.23%(Set #7)	2,4,6-Tri-isopropylbenzenesulfonamide.	J.C.Clark,M.L.McLaughlin,F.R.Fronczek	ACTA CRYSTALLOGR.,SECT.E:STRUCT.REP.ONLINE,2003,59,,o2005	P21/c	fcu/cubic closest packing; 12/3/c1; sqc19
GUHVEL	C18 H27 N1 O3 S1/Omega=4.30%(Set #6)	N-((1R,3R,4S,6S)-4-Hydroxy-4,7,7-trimethylbicyclo(4.1.0)heptan-3-yl)-N-4-dimethylbenzenesulfonamide.	K.Z.Laczkowski,A.Kmieciak,A.Kozakiewicz	TETRAHEDRON:ASYMM.,2009,20,,1487	P212121	fcu/cubic closest packing; 12/3/c1; sqc19
GUVQOE	C19 H18 N4 O5 S1/Omega=2.93%(Set #8)	N-(5,6-Dimethoxypyrimidin-4-yl)-4-((2-hydroxybenzylidene)amino)benzenesulfonamide.	Yun-Zhi Tang,He-Rui Wen,Jian Zhang,Yu-Hui Tan	Jiegou Huaxue(Chin.J.Struct.Chem.),2010,29,,69	P21/c	12T42
GUWPAQ	C11 H13 N1 O4 S1/Omega=3.81%(Set #6)	4-Methyl-N-(3-methyl-2-oxooxetan-3-yl)benzenesulfonamide.	C.Lauf,C.Bruhn,H.Frauenrath	Z.KRISTALLOGR.-NEW CRYST.STRUCT.,2010,225,,137	P212121	12T11
HABSOS	C10 H10 Cl1 N3 O2 S1/Omega=2.94%(Set #6)	5-Chloro-3-methyl-1-phenyl-4-pyrazolesulfonamide.	J.Iulek,J.Zukerman-Schpector,E.J.Barreiro,A.C.C.Freitas	ACTA CRYSTALLOGR.,SECT.C:CRYST.STRUCT.COMMUN.,1993,49,,1015	Cc	12T43
HAMTAR	C39 H42 Br1 N1 O5 S2 Si1/Omega=3.54%(Set #8)	N-((1S,2S,3R)-2-Bromo-3-(t-butyldiphenylsilyloxy)-1-phenyl-4-(phenylsulfonyl)butyl)-4-methylbenzenesulfonamide.	K.Ravikumar,G.Y.S.K.Swamy,S.Raghavan,Ch.Naveenkumar	ACTA CRYSTALLOGR.,SECT.E:STRUCT.REP.ONLINE,2004,60,,o2290	P21/n	12T35
HCSBTZ02	C7 H8 Cl1 N3 O4 S2/Omega=5.08%(Set #8)	6-Chloro-3,4-dihydro-2H-1,2,4-benzothiadiazine-7-sulfonamide-1,1-dioxide.	C.K.Leech,F.P.A.Fabbiani,K.Shankland,W.I.F.David,R.Ibberson	ACTA CRYSTALLOGR.,SECT.B:STRUCT.SCI.,2008,64,,101	P21/c	fcu/cubic closest packing; 12/3/c1; sqc19
HCSBTZ03	C7 H8 Cl1 N3 O4 S2/Omega=5.14%(Set #6)	6-Chloro-3,4-dihydro-2H-1,2,4-benzothiadiazine-7-sulfonamide 1,1-dioxide.	C.K.Leech,F.P.A.Fabbiani,K.Shankland,W.I.F.David,R.Ibberson	ACTA CRYSTALLOGR.,SECT.B:STRUCT.SCI.,2008,64,,101	P21	hcp/hexagonal closest packing; 12/3/h1
HCSBTZ04	C7 H8 Cl1 N3 O4 S2/Omega=5.00%(Set #8)	6-Chloro-3,4-dihydro-2H-1,2,4-benzothiadiazine-7-sulfonamide 1,1-dioxide.	C.K.Leech,F.P.A.Fabbiani,K.Shankland,W.I.F.David,R.Ibberson	ACTA CRYSTALLOGR.,SECT.B:STRUCT.SCI.,2008,64,,101	P21/c	fcu/cubic closest packing; 12/3/c1; sqc19
HEFTAO	C12 H10 Cl1 N1 O2 S1/Omega=4.91%(Set #7)	N-(2-Chlorophenyl)benzenesulfonamide.	G.L.Perlovich,V.V.Tkachev,K.-J.Schaper,O.A.Raevsky	ACTA CRYSTALLOGR.,SECT.E:STRUCT.REP.ONLINE,2006,62,,o780	P21/a	bcu-x/ 14-conn;I m -3 m->C m c m (a-b,a+b,c; 1/4,1/4,1/4);Bond sets: 2,3,4,5:bcu-x
HODWED01	C14 H15 N1 O2 S1/Omega=3.87%(Set #7)	N-(2,6-Dimethylphenyl)benzenesulfonamide.	P.Sanphui,B.Sarma,A.Nangia	CRYST.GROWTH DES.,2010,10,,4550	P21/n	hcp/hexagonal closest packing; 12/3/h1
HODWIH	C13 H13 N1 O2 S1/Omega=5.06%(Set #6)	N-(2-Methylphenyl)benzenesulfonamide.	B.T.Gowda,S.Foro,K.S.Babitha,H.Fuess	ACTA CRYSTALLOGR.,SECT.E:STRUCT.REP.ONLINE,2008,64,,o1692	P212121	fcu/cubic closest packing; 12/3/c1; sqc19
HOLGAR	C14 H15 N1 O2 S1/Omega=5.59%(Set #6)	N-(2,3-Dimethylphenyl)benzenesulfonamide.	B.T.Gowda,S.Foro,K.S.Babitha,H.Fuess	ACTA CRYSTALLOGR.,SECT.E:STRUCT.REP.ONLINE,2009,65,,o366	P212121	fcu/cubic closest packing; 12/3/c1; sqc19
HOYBIH	C17 H21 N3 O4 S1/Omega=3.84%(Set #9)	N-(3,4-Dimethyl-2,5-dioxo-2,5,7,8,9,9a-hexahydro-1H-pyrrolo[1,2-a][1,3]diazepin-1-yl)-4-methylbenzenesulfonamide.	K.L.Cubbage,A.J.Orr-Ewing,K.I.Booker-Milburn	Angew.Chem.,Int.Ed.,2009,48,,2514	P-1	fcu/cubic closest packing; 12/3/c1; sqc19
HUCSUU	C13 H12 N2 O2 S1/Omega=3.71%(Set #8)	4-(Benzylideneamino)benzenesulfonamide.	B.T.Loughrey,M.L.Williams,P.C.Healy	ACTA CRYSTALLOGR.,SECT.E:STRUCT.REP.ONLINE,2009,65,,o2087	P21/c	12T44
HUDLAU	C16 H13 N3 O3 S2/Omega=3.13%(Set #8)	N-(2,3-Dihydro-1,3-thiazol-2-ylidene)-4-((2-hydroxybenzylidene)amino)benzenesulfonamide.	Xin-Li Zhang	ACTA CRYSTALLOGR.,SECT.E:STRUCT.REP.ONLINE,2009,65,,o2274	P21/c	12T45
HUDWEJ	C14 H14 Cl1 N1 O2 S1/Omega=3.57%(Set #8)	4-Chloro-2-methyl-N-(3-methylphenyl)benzenesulfonamide.	B.T.Gowda,S.Foro,P.G.Nirmala,H.Fuess	ACTA CRYSTALLOGR.,SECT.E:STRUCT.REP.ONLINE,2010,66,,o14	P21/c	12T27
HUFVOU	C7 H8 N2 O4 S1/Omega=4.55%(Set #6)	2-Methyl-5-nitrobenzenesulfonamide.	M.Zia-ur-Rehman,I.U.Khan,N.Naz,M.N.Arshad	ACTA CRYSTALLOGR.,SECT.E:STRUCT.REP.ONLINE,2010,66,,o136	P212121	12T11
HUFVUZ	C18 H14 N4 O8 S2/Omega=3.63%(Set #8)	N,N'-m-Phenylenebis(4-nitrobenzenesulfonamide).	E.Heigel,H.Bock	ACTA CRYSTALLOGR.,SECT.E:STRUCT.REP.ONLINE,2001,57,,o239	P21/n	hcp/hexagonal closest packing; 12/3/h1
HUGFOF	C13 H12 Cl1 N1 O2 S1/Omega=3.18%(Set #8)	N-(2-Chlorophenyl)-4-methylbenzenesulfonamide.	B.T.Gowda,S.Foro,P.G.Nirmala,H.Fuess	ACTA CRYSTALLOGR.,SECT.E:STRUCT.REP.ONLINE,2010,66,,o188	P21/n	bcu-x/ 14-conn;I m -3 m->C m c m (a-b,a+b,c; 1/4,1/4,1/4);Bond sets: 2,3,4,5:bcu-x
HUKDOH	C24 H34 N2 O3 S1 Si1/Omega=3.18%(Set #7)	N-((3-(Diisopropyl(phenyl)silyl)-5-oxopyrrolidin-2-yl)methyl)-4-methylbenzenesulfonamide.	N.M.Leonard,K.A.Woerpel	J.ORG.CHEM.,2009,74,,6915	Pbca	bcu-x/ 14-conn;I m -3 m->I b c a (a+b,c,2a-2b; 3/4,1/4,1/4);Bond sets: 1,2,3,5,6:bcu-x
HUNXIY	C14 H16 N2 O2 S1/Omega=3.18%(Set #7)	4-Amino-N-(4-ethylphenyl)benzenesulfonamide.	G.L.Perlovich,V.V.Tkachev,N.N.Strakhova,V.P.Kazachenko,T.V.Volkova,O.V.Surov,K.-J.Schaper,O.A.Raevsky	J.Pharm.Sci.,2009,98,,4738	P21/c	12T25
HUNXOE	C13 H14 N2 O3 S1/Omega=3.24%(Set #7)	4-Amino-N-(4-methoxyphenyl)benzenesulfonamide.	G.L.Perlovich,V.V.Tkachev,N.N.Strakhova,V.P.Kazachenko,T.V.Volkova,O.V.Surov,K.-J.Schaper,O.A.Raevsky	J.Pharm.Sci.,2009,98,,4738	P21/c	12T25
HUNXUK	C13 H13 Cl1 N2 O2 S1/Omega=4.76%(Set #7)	4-Amino-N-(5-chloro-2-methylphenyl)benzenesulfonamide.	G.L.Perlovich,V.V.Tkachev,N.N.Strakhova,V.P.Kazachenko,T.V.Volkova,O.V.Surov,K.-J.Schaper,O.A.Raevsky	J.Pharm.Sci.,2009,98,,4738	P21/c	fcu/cubic closest packing; 12/3/c1; sqc19
HUVXAY	C16 H17 Br1 N2 O4 S1/Omega=3.23%(Set #6)	N-(2-Bromo-2-nitro-1-phenylpropyl)-4-methylbenzenesulfonamide.	Sanjun Zhi,Guanghui An,Hao Sun,Jianlin Han,Guigen Li,Yi Pan	TETRAHEDRON LETT.,2010,51,,2745	Pbca	bcu-x/ 14-conn;I m -3 m->I b c a (a+b,c,2a-2b; 3/4,1/4,1/4);Bond sets: 1,2,3,5,6:bcu-x
ICINIT	C30 H41 N1 O3 S1 Si1/Omega=3.10%(Set #6)	N-(4-(5-((t-Butyl(dimethyl)silyl)oxy)-2-phenylpentyl)phenyl)-4-methylbenzenesulfonamide.	A.Saxena,Hon Wai Lam	Chemical Science,2011,2,,2326	P212121	hcp/hexagonal closest packing; 12/3/h1
IDIMOY	C14 H11 N3 O4 S1/Omega=3.59%(Set #7)	4-(2-oxido-4-phenyl[1,2,5]oxadiazol-3-yl)benzenesulfonamide.	E.Del Grosso,D.Boschi,L.Lazzarato,C.Cena,A.Di Stilo,R.Fruttero,S.Moro,A.Gasco	Chem.Biodiversity,2005,2,,886	P21/c	12T25
IDIXEZ	C12 H9 Cl2 N1 O2 S1/Omega=4.51%(Set #7)	N-(2,3-Dichlorophenyl)benzenesulfonamide.	V.V.Tkachev,K.-J.Schaper,N.N.Strakhova,V.P.Kazachenko	ACTA CRYSTALLOGR.,SECT.E:STRUCT.REP.ONLINE,2006,62,,o2514	P21/c	bcu-x/ 14-conn;I m -3 m->C m c m (a-b,a+b,c; 1/4,1/4,1/4);Bond sets: 2,3,4,5:bcu-x
IPUFOP	C26 H27 Br1 N3 O7 S2/Omega=4.84%(Set #6)	N-(1-(3-Bromo-1-((4-methylphenyl)sulfonyl)-1H-indol-4-yl)-3-hydroxy-3-methylbutyl)-2-(hydroxy(oxido)-\l^5^-azanyl)benzenesulfonamide.	D.C.Behenna,S.Krishnan,B.M.Stoltz	TETRAHEDRON LETT.,2011,52,,2152	P212121	12T5
IXEWAJ	C20 H26 N2 O4 S2/Omega=5.79%(Set #5)	1,2-bis(p-Toluenesulfonamido)cyclohexane.	M.Nieger,W.Josten,F.Vogtle	PRIVATE COMMUNICATION,2004,,,	Pcca	fcu/cubic closest packing; 12/3/c1; sqc19
IYAVOU	C19 H22 N2 O4 S1/Omega=2.16%(Set #10)	N-(2-(5-Methoxy-1-methyl-2-oxo-2,3-dihydro-1H-indol-3-yl)ethyl)-4-methylbenzenesulfonamide.	O.Lozano,G.Blessley,T.M.del Campo,A.L.Thompson,G.T.Giuffredi,M.Bettati,M.Walker,R.Borman,V.Gouverneur	Angew.Chem.,Int.Ed.,2011,50,,8105	P-1	12T15
JAZZOZ10	C10 H14 N6 O6 S1/Omega=5.24%(Set #6)	2-Amino-9-(\b-D-ribofuranosyl)-9H-purine-6-sulfonamide.	S.B.Larson,N.B.Hanna,G.R.Revankar,R.K.Robins	ACTA CRYSTALLOGR.,SECT.C:CRYST.STRUCT.COMMUN.,1990,46,,512	P21	hcp/hexagonal closest packing; 12/3/h1
JECQUD	C21 H19 N1 O3 S1/Omega=2.97%(Set #8)	N-(2-Oxo-1,2-diphenylethyl)-4-toluenesulfonamide.	G.Mloston,M.Celeda,A.Swiatek,M.Kagi,H.Heimgartner	POL.J.CHEM.,1998,72,,1907	P21/n	fcu/cubic closest packing; 12/3/c1; sqc19
JEHWUO	C6 H7 N1 O3 S1/Omega=4.82%(Set #6)	N-(Hydroxy)benzenesulfonamide.	J.N.Scholz,P.S.Engel,C.Glidewell,K.H.Whitmire	TETRAHEDRON,1989,45,,7695	Pna21	fcu/cubic closest packing; 12/3/c1; sqc19
JEHXAV	C12 H11 N1 O5 S2/Omega=5.69%(Set #8)	N-(Hydroxy)-N-(phenylsulfonyl)benzenesulfonamide.	J.N.Scholz,P.S.Engel,C.Glidewell,K.H.Whitmire	TETRAHEDRON,1989,45,,7695	P21/n	fcu/cubic closest packing; 12/3/c1; sqc19
JEHXEZ	C12 H11 N1 O5 S2/Omega=4.36%(Set #8)	N-((Phenylsulfonyl)oxy)benzenesulfonamide.	J.N.Scholz,P.S.Engel,C.Glidewell,K.H.Whitmire	TETRAHEDRON,1989,45,,7695	P21/a	12T42
KABCAT	C12 H15 Cl2 N1 O2 S1/Omega=5.16%(Set #6)	2,5-Dichloro-N-cyclohexylbenzenesulfonamide.	I.U.Khan,S.Sharif,S.Batool,A.M.Mumtaz,E.R.T.Tiekink	ACTA CRYSTALLOGR.,SECT.E:STRUCT.REP.ONLINE,2010,66,,o2641	Cc	bcu-x/ 14-conn;I m -3 m->I 41/a c d (2a,2b,2c; 1/2,1/2,1/2);Bond sets: 1,2,3,5,6:bcu-x
KABGOK	C32 H29 N1 O4 S1/Omega=2.93%(Set #7)	anti-N-(2,4-Dibenzoyl-1-phenylpent-4-enyl)-4-methylbenzenesulfonamide.	Min Shi,Yong-Mei Xu	J.ORG.CHEM.,2003,68,,4784	P21/c	hcp/hexagonal closest packing; 12/3/h1
KABGUR	C11 H12 N4 O3 S1/Omega=2.52%(Set #7)	4-Amino-N-(3-methoxypyrazin-2-yl)benzenesulfonamide.	B.Bruni,S.A.Coran,G.Bartolucci,M.Di Vaira	ACTA CRYSTALLOGR.,SECT.E:STRUCT.REP.ONLINE,2010,66,,o2663	Pbca	12T46
KAFWUL	C13 H7 F6 N5 O2 S1/Omega=2.13%(Set #8)	5-Methyl-7-(trifluoromethyl)-N-(2,3,4-trifluorophenyl)[1,2,4]triazolo[1,5-c]pyrimidine-2-sulfonamide.	Chao-Nan Chen,Qiong Chen,Yu-Chao Liu,Xiao-Lei Zhu,Cong-Wei Niu,Zhen Xi,Guang-Fu Yang	BIOORG.MED.CHEM.,2010,18,,4897	P21/c	fcu/cubic closest packing; 12/3/c1; sqc19
KAPCEJ	C15 H23 N1 O4 S1/Omega=3.43%(Set #6)	5-Hydroxy-2,2-dimethyl-4-(p-toluenesulfonamido)-3-hexanone.	I.Vencato,Y.P.Mascarenhas,R.A.Pilli,M.I.H.Agostini	ACTA CRYSTALLOGR.,SECT.C:CRYST.STRUCT.COMMUN.,1989,45,,1174	Cc	bcu-x/ 14-conn;I m -3 m->P 21/c (1/2a+1/2b+1/2c,2a-2b,-c; 1/2,0,1/2);Bond sets: 1,2,4,5,7,8,9:bcu-x
KARKAR	C21 H21 F1 N2 O3 S2/Omega=4.38%(Set #6)	4-Fluoro-N-(3-hydroxy-1-phenyl-4-(pyridin-2-ylsulfanyl)butan-2-yl)benzenesulfonamide.	W.T.Vellasco Junior,G.P.Guedes,T.R.A.Vasconcelos,M.G.F.Vaz,M.V.N.de Souza,A.U.Krettli,L.G.Krettli,A.C.C.Aguiar,C.R.B.Gomes,W.Cunico	EUR.J.MED.CHEM.,2011,46,,5688	P21	fcu/cubic closest packing; 12/3/c1; sqc19
KASXIM	C26 H21 N3 O5 S1/Omega=2.92%(Set #8)	4-Amino-N-(5-methylisoxazol-3-yl)-N-((4-oxo-2-phenyl-4H-1-benzopyran-6-yl)methyl)benzenesulfonamide.	S.Ozbey,A.Akbas,G.Ayhan-Kilcigil,R.Ertan	ACTA CRYSTALLOGR.,SECT.C:CRYST.STRUCT.COMMUN.,2005,61,,o559	P21/c	bcu-x/ 14-conn;I m -3 m->C m c m (a-b,a+b,c; 1/4,1/4,1/4);Bond sets: 2,3,4,5:bcu-x
KIFZUV	C10 H13 N1 O4 S2/Omega=2.53%(Set #7)	6-Methylthiochroman-7-sulfonamide 1,1-dioxide.	R.Tanaka,N.Hirayama	Anal.Sci.:X-Ray Struct.Anal.Online,2007,23,,x119	Pbca	12T47
KIHMIY	C18 H18 N2 O2 S2/Omega=4.13%(Set #8)	N-(3-Cyano-2-((4-methylphenyl)sulfanyl)prop-2-en-1-yl)-4-methylbenzenesulfonamide.	Young Tak Lee,Soo Young Choi,Young Keun Chung	TETRAHEDRON LETT.,2007,48,,5673	P21/c	fcu/cubic closest packing; 12/3/c1; sqc19
KIXHEF	C15 H15 Cl1 N2 O3 S1/Omega=2.80%(Set #8)	4-(2-((5-Chloro-2-hydroxybenzylidene)amino)ethyl)benzenesulfonamide.	Z.H.Chohan,H.A.Shad,M.N.Tahir,I.U.Khan	ACTA CRYSTALLOGR.,SECT.E:STRUCT.REP.ONLINE,2008,64,,o725	C2/c	12T48
KIXPIQ	C15 H11 N1 O4 S1/Omega=3.94%(Set #9)	3-(4-Oxo-4H-1-benzopyran-2-yl)benzenesulfonamide.	E.Kendi,S.Ozbey,O.Bozdag,R.Ertan	ACTA CRYSTALLOGR.,SECT.C:CRYST.STRUCT.COMMUN.,2000,56,,457	P-1	fcu/cubic closest packing; 12/3/c1; sqc19
KOLHUP	C20 H21 F1 N2 O2 S1/Omega=3.61%(Set #6)	(S)-N-(3-(1-Cyclopropyl-1-(4-fluorophenyl)ethyl)-1H-indol-7-yl)methanesulfonamide.	M.G.Bell,D.L.Gernert,T.A.Grese,M.D.Belvo,P.S.Borromeo,S.A.Kelley,J.H.Kennedy,S.P.Kolis,P.A.Lander,R.Richey,V.S.Sharp,G.A.Stephenson,J.D.Williams,H.Yu,K.M.Zimmerman,M.I.Steinberg,P.K.Jadhav	J.Med.Chem.,2007,50,,6443	P212121	hcp/hexagonal closest packing; 12/3/h1
KUMKEJ	C29 H25 Br1 N2 O3 S1/Omega=1.41%(Set #7)	N-((S)-((3S)-3-(4-Bromobenzyl)-2-oxo-2,3-dihydro-1H-indol-3-yl)(phenyl)methyl)-4-methylbenzenesulfonamide unknown solvate.	Liang Cheng,Li Liu,Han Jia,Dong Wang,Yong-Jun Chen	J.ORG.CHEM.,2009,74,,4650	P43212	12T49
KUSVOK	C14 H15 N1 O2 S1/Omega=3.75%(Set #9)	4-Methyl-N-(4-methylphenyl)benzenesulfonamide.	I.U.Khan,S.Sharif,M.Akkurt,A.Sajjad,J.Ahmad	ACTA CRYSTALLOGR.,SECT.E:STRUCT.REP.ONLINE,2010,66,,o786	P-1	bcu-x/ 14-conn;I m -3 m->C m c m (a-b,a+b,c; 1/4,1/4,1/4);Bond sets: 2,3,4,5:bcu-x
KUSXEC	C13 H10 Cl1 N1 O3 S1/Omega=3.23%(Set #9)	N-Benzoyl-2-chlorobenzenesulfonamide.	B.T.Gowda,S.Foro,P.A.Suchetan,H.Fuess	ACTA CRYSTALLOGR.,SECT.E:STRUCT.REP.ONLINE,2010,66,,o794	P-1	hcp/hexagonal closest packing; 12/3/h1
KUVHUF	C15 H17 N1 O2 S1/Omega=2.42%(Set #8)	2,4-Dimethyl-N-(3-methylphenyl)benzenesulfonamide.	P.G.Nirmala,B.T.Gowda,S.Foro,H.Fuess	ACTA CRYSTALLOGR.,SECT.E:STRUCT.REP.ONLINE,2010,66,,o989	P21/c	12T35
KUZTEF	C11 H14 N2 O6 S1/Omega=5.46%(Set #6)	(2S)-3-Carbamoyl-2-(4-methoxybenzenesulfonamido)propanoic acid.	H.Mubashar-ur-Rehman,I.U.Khan,M.N.Arshad,K.T.Holman	ACTA CRYSTALLOGR.,SECT.E:STRUCT.REP.ONLINE,2010,66,,o2596	P21	fcu/cubic closest packing; 12/3/c1; sqc19
KUZWIM	C13 H11 N3 O5 S1/Omega=4.07%(Set #8)	4-((2-Hydroxy-5-nitrobenzylidene)amino)benzenesulfonamide.	Yi-Han Tan,Siang Guan Teoh,Wan-Sin Loh,Hoong-Kun Fun	ACTA CRYSTALLOGR.,SECT.E:STRUCT.REP.ONLINE,2010,66,,o2610	P21/c	12T8
LAPCEM	C17 H17 N3 O5 S2/Omega=3.61%(Set #7)	4-Methyl-N-(4-((5-methyl-1,2-oxazol-3-yl)sulfamoyl)phenyl)benzenesulfonamide.	M.Sohail,M.N.Asghar,M.N.Tahir,M.Shafique,M.Ashfaq	ACTA CRYSTALLOGR.,SECT.E:STRUCT.REP.ONLINE,2012,68,,o693	P21/c	bcu-x/ 14-conn;I m -3 m->P 21/c (1/2a+1/2b+1/2c,-a+b,-a-b+c; 1/2,0,0);Bond sets: 1,2,3,5,7,8,9:bcu-x
LAPSUS	C13 H9 Cl1 N2 O5 S1/Omega=4.26%(Set #7)	N-(3-Chlorobenzoyl)-2-nitrobenzenesulfonamide.	P.A.Suchetan,S.Foro,B.T.Gowda,M.S.Prakash	ACTA CRYSTALLOGR.,SECT.E:STRUCT.REP.ONLINE,2012,68,,o786	Pbca	12T38
LAQLIA	C14 H12 N2 O5 S1/Omega=3.87%(Set #7)	N-(4-Methylbenzoyl)-4-nitrobenzenesulfonamide.	P.A.Suchetan,S.Foro,B.T.Gowda	ACTA CRYSTALLOGR.,SECT.E:STRUCT.REP.ONLINE,2012,68,,o888	Pbca	12T50
LAVPUV	C20 H27 N1 O4 S1/Omega=2.08%(Set #7)	N-Benzyl-N-(3,5-dihydroxy-4-methylpentan-2-yl)-4-methylbenzenesulfonamide.	P.B.Brady,H.Yamamoto	Angew.Chem.,Int.Ed.,2012,51,,1942	P21/c	hcp/hexagonal closest packing; 12/3/h1
LAWMIH	C14 H13 N5 O4 S1/Omega=2.55%(Set #8)	N-(Diaminomethylene)-4-((3-formyl-4-hydroxyphenyl)diazenyl)benzenesulfonamide.	H.El-Ghamry,K.Sakai,S.Masaoka,K.El-Baradie,R.Issa	J.Coord.Chem.,2012,65,,780	P21/c	12T51
LEFFAF	C14 H18 N2 O3 S1/Omega=2.55%(Set #6)	4-((5,5-Dimethyl-3-oxocyclohex-1-en-1-yl)amino)benzenesulfonamide.	M.S.Al-Said,M.M.Ghorab,H.A.Ghabbour,C.K.Quah,H.-K.Fun	ACTA CRYSTALLOGR.,SECT.E:STRUCT.REP.ONLINE,2012,68,,o2370	Pbca	12T52
LEFXEB	C13 H11 Cl2 N1 O2 S1/Omega=3.78%(Set #7)	2,5-Dichloro-N-(3-methylphenyl)benzenesulfonamide.	S.Y.Mughal,I.U.Khan,W.T.A.Harrison,M.H.Khan,M.N.Arshad	ACTA CRYSTALLOGR.,SECT.E:STRUCT.REP.ONLINE,2012,68,,o2476	P21/n	hcp/hexagonal closest packing; 12/3/h1
LEGQIZ	C12 H9 Cl1 N2 O4 S1/Omega=4.49%(Set #7)	N-(2-Chlorophenyl)-2-nitrobenzenesulfonamide.	U.Chaithanya,S.Foro,B.T.Gowda	ACTA CRYSTALLOGR.,SECT.E:STRUCT.REP.ONLINE,2012,68,,o2575	P21/c	hcp/hexagonal closest packing; 12/3/h1
LEGQOF	C12 H9 Cl1 N2 O4 S1/Omega=6.03%(Set #8)	N-(3-Chlorophenyl)-2-nitrobenzenesulfonamide.	U.Chaithanya,S.Foro,B.T.Gowda	ACTA CRYSTALLOGR.,SECT.E:STRUCT.REP.ONLINE,2012,68,,o2576	P21/c	fcu/cubic closest packing; 12/3/c1; sqc19
LEGQUL	C12 H9 Cl1 N2 O4 S1/Omega=3.62%(Set #8)	N-(4-Chlorophenyl)-2-nitrobenzenesulfonamide.	U.Chaithanya,S.Foro,B.T.Gowda	ACTA CRYSTALLOGR.,SECT.E:STRUCT.REP.ONLINE,2012,68,,o2577	P21/c	12T53
LIJGOB	C24 H23 N1 O5 S1/Omega=3.33%(Set #9)	N-(4-Methoxybenzyl)-3-((1E)-3-oxo-3-phenylprop-1-en-1-yl)-6-methoxybenzenesulfonamide.	C.R.Andrighetti-Frohner,R.J.Nunes,L.E.da Silva,C.M.O.Simoes,S.Foro	ACTA CRYSTALLOGR.,SECT.E:STRUCT.REP.ONLINE,2007,63,,o3437	P-1	bcu-x/ 14-conn;I m -3 m->C m c m (a-b,a+b,c; 1/4,1/4,1/4);Bond sets: 2,3,4,5:bcu-x
LIQKUS	C14 H18 N4 O4 S2/Omega=4.85%(Set #7)	N-Benzyl-5-(N-(t-butyloxycarbonyl)amino)-1,3,4-thiadiazole-2-sulfonamide.	G.E.Cami,M.del C.R.de Arellano,S.Fustero,J.C.Pedregosa	J.Argent.Chem.Soc.,2006,94,,5	P21/c	bcu-x/ 14-conn;I m -3 m->P 21/c (1/2a+1/2b+1/2c,-a+b,-a-b+c; 1/2,0,0);Bond sets: 1,2,3,5,7,8,9:bcu-x
LIYTAO	C21 H21 N3 O4 S1/Omega=3.15%(Set #6)	trans-N-(2-Formyl-4-(5-formylpyrrol-2-yl)-4,5,6,7-tetrahydroindol-7-yl)toluenesulfonamide.	Yu.Zhao,M.Helliwell,J.A.Joule	ACTA CRYSTALLOGR.,SECT.C:CRYST.STRUCT.COMMUN.,2000,56,,714	Pna21	hcp/hexagonal closest packing; 12/3/h1
LOCHUH	C13 H17 N5 O2 S1/Omega=4.20%(Set #7)	4-Amino-N-(4,6-diethyl-1,3,5-triazin-2-yl)benzenesulfonamide.	M.F.Haddow,T.Gelbrich,U.J.Griesser	ACTA CRYSTALLOGR.,SECT.C:CRYST.STRUCT.COMMUN.,2008,64,,o309	P21/n	hcp/hexagonal closest packing; 12/3/h1
LOHXIQ	C9 H10 Br1 N1 O4 S1/Omega=1.91%(Set #10)	Methyl (4-bromobenzenesulfonamido)acetate.	M.N.Arshad,M.N.Tahir,I.U.Khan,E.Ahmad,M.Shafiq	ACTA CRYSTALLOGR.,SECT.E:STRUCT.REP.ONLINE,2008,64,,o2380	P-1	fcu/cubic closest packing; 12/3/c1; sqc19
LOMWIT	C14 H11 N1 O6 S3/Omega=2.92%(Set #8)	5-(Benzoyloxymethyl)thieno(2,3-b)thiophene-2-sulfonamide 6,6-dioxide.	Hwang-Hsing Chen,J.A.May,V.M.Lynch	J.HETEROCYCL.CHEM.,1999,36,,249	P21/c	12T54
LUTNIY	C17 H19 N1 O2 S1/Omega=1.83%(Set #6)	N-((1,2-Diphenylcyclopropyl)methyl)methanesulfonamide.	S.Chuprakov,S.W.Kwok,Li Zhang,L.Lercher,V.V.Fokin	J.AM.CHEM.SOC.,2009,131,,18034	P212121	12T11
MACLEJ	C21 H25 N1 O3 S1/Omega=3.90%(Set #6)	(R,R,R)-4-Methyl-N-((2-methyl-6-oxocyclohexyl)(phenyl)methyl)benzenesulfonamide.	R.Sebesta,F.Bilcik,P.Fodran	EUR.J.ORG.CHEM.,2010,,,5666	P21	fcu/cubic closest packing; 12/3/c1; sqc19
MANMUK	C20 H20 Br2 N4 O4 S1/Omega=1.72%(Set #9)	N-((2,3-Dibromo-10-oxo-7,8-dihydro-6H,10H-dipyrrolo[1,2-a:1',2'-d]pyrazin-5-ylamino)-(2,6-dimethylphenoxy)methylidene)methanesulfonamide.	D.E.N.Jacquot,M.Zollinger,T.Lindel	Angew.Chem.,Int.Ed.,2005,44,,2295	P-1	bcu-x/ 14-conn;I m -3 m->P -1 (-1/2a+1/2b+1/2c,1/2a-1/2b+1/2c,a+b; 3/4,3/4,1/4);Bond sets: 2,3,4,5,6,7,8,9,11:bcu-x
MEHMAO	C18 H16 Cl1 N3 O3 S1/Omega=2.80%(Set #8)	N-(3-Benzyloxy-5-methylpyrazin-2-yl)-2-chloro-benzenesulfonamide.	Shu-Rong Ban,Xing Yang,Wen-Bin Chen,Xiao-Feng Cheng,Hai-Bin Song	ACTA CRYSTALLOGR.,SECT.E:STRUCT.REP.ONLINE,2006,62,,o1713	P21/n	12T55
MIGTUS	C9 H13 N1 O2 S1/Omega=4.68%(Set #7)	N-(3,5-Dimethylphenyl)methanesulfonamide.	B.T.Gowda,S.Foro,H.Fuess	ACTA CRYSTALLOGR.,SECT.E:STRUCT.REP.ONLINE,2007,63,,o3325	P21/c	12T56
MIJDIT	C18 H20 N2 O5 S1/Omega=4.74%(Set #6)	4-methyl-N-(2-methyl-1-(4-nitrophenyl)-3-oxobutyl)benzenesulfonamide.	S.A.Garner,M.J.Krische	J.ORG.CHEM.,2007,72,,5843	P212121	hcp/hexagonal closest packing; 12/3/h1
MILHOF02	C28 H27 N3 O4 S2/Omega=2.21%(Set #10)	4-methyl-N-(2-[([2-((p-tosylamino)methyl)phenyl]imino)methyl]phenyl)benzenesulfonamide.	J.Sanmartin,F.Novio,A.M.Garcia-Deibe,M.Fondo,M.R.Bermejo	New J.Chem.,2007,31,,1605	P-1	12T15
MOKMIJ	C13 H11 Cl1 N2 O3 S1/Omega=2.33%(Set #6)	4-((E)-(5-Chloro-2-hydroxybenzylidene)amino)benzenesulfonamide.	Z.H.Chohan,H.A.Shad,M.N.Tahir	ACTA CRYSTALLOGR.,SECT.E:STRUCT.REP.ONLINE,2009,65,,o57	P21	12T11
MORNUD	C19 H26 N2 O3 S1/Omega=2.94%(Set #6)	N-(1-Anilino-3-hydroxy-4-methyl-1-phenyl-2-pentanyl)methanesulfonamide.	Wei Du,Yan-Kai Liu,Lei Yue,Ying-Chun Chen	SYNLETT,2008,,,2997	P212121	bcu-x/ 14-conn;I m -3 m->C m c m (a+b,c,a-b; 1/4,3/4,1/4);Bond sets: 1,3,4,5:bcu-x
MOTDEF	C14 H14 N2 O5 S2/Omega=3.27%(Set #8)	N-Acetyl-4-(benzenesulfonamido)benzenesulfonamide.	M.Ashfaq,M.N.Tahir,I.U.Khan,M.N.Arshad,S.Saeed-ul-Hassan	ACTA CRYSTALLOGR.,SECT.E:STRUCT.REP.ONLINE,2009,65,,o1180	P21/n	hcp/hexagonal closest packing; 12/3/h1
MOVQIY	C17 H16 N2 O2 S1/Omega=3.06%(Set #8)	4-Methyl-N-(2-(1H-pyrrol-3-yl)phenyl)benzenesulfonamide.	A.B.Vazquez,S.Bernes,A.Ortiz,L.Quintero,R.L.Meza-Leon	TETRAHEDRON LETT.,2009,50,,1539	P21/c	fcu/cubic closest packing; 12/3/c1; sqc19
MOWYON	C12 H9 F2 N5 O3 S1/Omega=4.38%(Set #7)	N-(2,6-Difluorophenyl)-5-methoxy[1,2,4]triazolo[1,5-a]pyrimidine-2-sulfonamide.	Chao-Nan Chen,Li-Li Lv,Feng-Qin Ji,Qiong Chen,Hui Xu,Cong-Wei Niu,Zhen Xi,Guang-Fu Yang	BIOORG.MED.CHEM.,2009,17,,3011	P21/c	12T57
MSULPH01	C1 H5 N1 O2 S1/Omega=4.83%(Set #5)	Methanesulfonamide.	R.Frohlich,B.Wibbeling	PRIVATE COMMUNICATION,2000,,,	Pnma	hcp/hexagonal closest packing; 12/3/h1
MUBVOV	C7 H10 N2 O2 S1/Omega=3.33%(Set #7)	5-Amino-2-methylbenzenesulfonamide.	Xiang-Jun Ma,Zheng Fang,Li-Li Ren,Ping Wei	ACTA CRYSTALLOGR.,SECT.E:STRUCT.REP.ONLINE,2009,65,,o1815	Iba2	fcu/cubic closest packing; 12/3/c1; sqc19
MUBVUB	C8 H8 Br1 N1 O4 S1/Omega=1.65%(Set #9)	2-(4-Bromobenzenesulfonamido)acetic acid.	M.N.Arshad,I.U.Khan,M.Shafiq,M.N.Khan,H.Stoeckli-Evans	ACTA CRYSTALLOGR.,SECT.E:STRUCT.REP.ONLINE,2009,65,,o1816	P-1	hcp/hexagonal closest packing; 12/3/h1
MUCWAJ	C14 H19 N1 O3 S1/Omega=4.44%(Set #6)	N-(4-Methoxyhex-5-yn-2-yl)-4-methylbenzenesulfonamide.	V.Prisyazhnyuk,M.Jachan,I.Brudgam,R.Zimmer,H.-U.Reissig	COLLECT.CZECH.CHEM.COMMUN.,2009,74,,1069	P21	fcu/cubic closest packing; 12/3/c1; sqc19
MUFCEW	C23 H21 Br1 N2 O4 S1/Omega=3.20%(Set #6)	N-(1-(4-Bromophenyl)-2-nitro-3-phenylbut-3-en-1-yl)-4-methylbenzenesulfonamide.	Xiao Wang,Yong-Fei Chen,Liang-Feng Niu,Peng-Fei Xu	Org.Lett.,2009,11,,3310	P212121	hcp/hexagonal closest packing; 12/3/h1
MUZZAJ	C28 H27 F6 N3 O3 S1/Omega=3.09%(Set #7)	N-(6'-Methoxycinchonan-9-yl)-3,5-bis(trifluoromethyl)benzenesulfonamide.	Sang Eun Park,Eun Hye Nam,Hyeong Bin Jang,Joong Suk Oh,S.Some,Yong Seup Lee,Choong Eui Song	ADV.SYNTH.CATAL.,2010,352,,2211	C2	12T58
NABPUD	C22 H25 Br1 N2 O5 S1/Omega=3.13%(Set #6)	(R)-(+)-N-(4-((6-Bromo-2,2-dimethyl-5'-oxo-2,3-dihydro-4'H-spiro[chromene-4,2'-[1,4]oxazinan]-4'-yl)methyl)phenyl)methanesulfonamide.	S.Rapposelli,V.Calderone,R.Cirilli,M.Digiacomo,C.Faggi,F.La Torre,M.Manganaro,A.Martelli,L.Testai	J.Med.Chem.,2009,52,,1477	P31	12T59
NABQAK	C22 H25 Br1 N2 O5 S1/Omega=2.97%(Set #6)	(S)-(-)-N-(4-((6-Bromo-2,2-dimethyl-5'-oxo-2,3-dihydro-4'H-spiro[chromene-4,2'-[1,4]oxazinan]-4'-yl)methyl)phenyl)methanesulfonamide.	S.Rapposelli,V.Calderone,R.Cirilli,M.Digiacomo,C.Faggi,F.La Torre,M.Manganaro,A.Martelli,L.Testai	J.Med.Chem.,2009,52,,1477	P32	12T59
NACMIP	C13 H16 Br1 N5 O3 S1/Omega=3.19%(Set #10)	4-((2-(4-Bromo-1H-pyrrol-2-yl)-4,5-dihydro-1,3-oxazol-5-yl)methyl)-N,N-dimethyl-1H-imidazole-1-sulfonamide.	S.Mukherjee,R.Sivappa,M.Yousufuddin,C.J.Lovely	SYNLETT,2010,,,817	P-1	fcu/cubic closest packing; 12/3/c1; sqc19
NARVUZ	C10 H9 N3 O3 S1/Omega=3.37%(Set #7)	2-Oxo-2H-1,4'-bipyridine-3'-sulfonamide.	Z.Brzozowski,J.Slawinski,M.Gdaniec,A.Innocenti,C.T.Supuran	EUR.J.MED.CHEM.,2011,46,,4403	P21/n	bcu-x/ 14-conn;I m -3 m->C m c m (a+b,c,a-b; 1/4,3/4,1/4);Bond sets: 1,3,4,5:bcu-x
NIWGOQ	C19 H24 N2 O4 S2/Omega=2.05%(Set #8)	N-(2-(Methylsulfonyl(pyridine-2-yl)methyl)cyclopentyl)-4-methylbenzenesulfonamide.	E.V.Blyumin,H.J.Gallon,A.K.Yudin	Org.Lett.,2007,9,,4677	P21/c	ild; sqc15
NIWPAL	C9 H12 N2 O2 S1/Omega=2.65%(Set #6)	1,2,3,4-Tetrahydroisoquinoline-2-sulfonamide.	R.Bouasla,M.Berredjem,N.-E.Aouf,C.Barbey	ACTA CRYSTALLOGR.,SECT.E:STRUCT.REP.ONLINE,2008,64,,o432	P21	hcp/hexagonal closest packing; 12/3/h1
NODYEL	C23 H21 N1 O3 S1/Omega=3.61%(Set #9)	4-Methyl-N-(5,6,6a,11a-tetrahydrobenzo[b]naphtho[2,1-d]furan-8-yl)benzenesulfonamide.	Renhua Fan,Weixun Li,Yang Ye,Linfei Wang	ADV.SYNTH.CATAL.,2008,350,,1531	P-1	hcp/hexagonal closest packing; 12/3/h1
NOKHAX	C43 H37 Cl1 N2 O4 S1/Omega=5.05%(Set #7)	rac-N-(2-(3-(9'-Anthracenyl-10'-chloro)-4-pentanoylisoxazol-5-yl)-1,3-diphenylpropyl)benzenesulfonamide.	Chun Li,B.Twamley,N.R.Natale	J.HETEROCYCL.CHEM.,2008,45,,259	P21/c	fcu/cubic closest packing; 12/3/c1; sqc19
NORHIM	C14 H14 Cl1 N1 O2 S1/Omega=4.48%(Set #9)	4-Chloro-2-methyl-N-(2-methylphenyl)benzenesulfonamide.	B.T.Gowda,S.Foro,P.G.Nirmala,H.Terao,H.Fuess	ACTA CRYSTALLOGR.,SECT.E:STRUCT.REP.ONLINE,2009,65,,o800	P-1	fcu/cubic closest packing; 12/3/c1; sqc19
NUJZOH	C16 H14 N2 O4 S1/Omega=3.09%(Set #6)	4-Nitro-N-((1aRS,6RS,6aSR)-1,1a,6,6a-tetrahydrocyclopropa(a)inden-6-yl)benzenesulfonamide.	I.Nageli,C.Baud,G.Bernardinelli,Y.Jacquier,M.Moran,P.Muller	HELV.CHIM.ACTA,1997,80,,1087	Cc	fcu/cubic closest packing; 12/3/c1; sqc19
NUPNOC	C14 H13 N1 O3 S1/Omega=3.61%(Set #6)	N-Benzoyl-2-methylbenzenesulfonamide.	P.A.Suchetan,B.T.Gowda,S.Foro,H.Fuess	ACTA CRYSTALLOGR.,SECT.E:STRUCT.REP.ONLINE,2010,66,,o1024	Pna21	12T60
NUPQUL	C14 H13 N1 O3 S1/Omega=3.85%(Set #6)	N-Benzoyl-4-methylbenzenesulfonamide.	P.A.Suchetan,B.T.Gowda,S.Foro,H.Fuess	ACTA CRYSTALLOGR.,SECT.E:STRUCT.REP.ONLINE,2010,66,,o1039	P212121	12T5
NUPRAS	C13 H9 Cl2 N1 O3 S1/Omega=3.76%(Set #8)	2-Chloro-N-(2-chlorobenzoyl)benzenesulfonamide.	P.A.Suchetan,B.T.Gowda,S.Foro,H.Fuess	ACTA CRYSTALLOGR.,SECT.E:STRUCT.REP.ONLINE,2010,66,,o1040	P21/n	hcp/hexagonal closest packing; 12/3/h1
NUPTOI	C16 H19 N1 O2 S1/Omega=3.50%(Set #9)	N-(2,4-Dimethylphenyl)-2,4-dimethylbenzenesulfonamide.	P.G.Nirmala,B.T.Gowda,S.Foro,H.Fuess	ACTA CRYSTALLOGR.,SECT.E:STRUCT.REP.ONLINE,2010,66,,o1059	P-1	fcu/cubic closest packing; 12/3/c1; sqc19
NUPZEE	C12 H11 N1 O3 S1/Omega=4.87%(Set #6)	N-(4-Hydroxyphenyl)benzenesulfonamide.	I.U.Khan,I.Mariam,M.Zia-ur-Rehman,M.Arif Sajjad,S.Sharif	ACTA CRYSTALLOGR.,SECT.E:STRUCT.REP.ONLINE,2010,66,,o1088	P212121	fcu/cubic closest packing; 12/3/c1; sqc19
NUPZOO	C14 H13 Cl2 N1 O2 S1/Omega=2.61%(Set #8)	N-(3,5-Dichlorophenyl)-2,4-dimethylbenzenesulfonamide.	P.G.Nirmala,B.T.Gowda,S.Foro,H.Fuess	ACTA CRYSTALLOGR.,SECT.E:STRUCT.REP.ONLINE,2010,66,,o1090	C2/c	12T61
NUQQEW	C15 H17 N1 O2 S1/Omega=2.27%(Set #7)	N-(2,6-Dimethylphenyl)-4-methylbenzenesulfonamide.	P.G.Nirmala,B.T.Gowda,S.Foro,H.Fuess	ACTA CRYSTALLOGR.,SECT.E:STRUCT.REP.ONLINE,2010,66,,o1168	P21/n	bcu-x/ 14-conn;I m -3 m->P 21/c (1/2a+1/2b+1/2c,-a+b,-a-b+c; 1/2,0,0);Bond sets: 1,2,3,5,7,8,9:bcu-x
NUVVUW	C29 H29 N5 O4 S1/Omega=2.47%(Set #6)	N-(1-(3-(1H-Indol-3-yl)-5-oxo-6-phenyl-4,5-dihydro-1,2,4-triazin-2(3H)-yl)-3-methyl-1-oxobutan-2-yl)-4-methylbenzenesulfonamide.	I.N.Egorov,V.L.Rusinov,P.A.Slepukhin,O.N.Chupakhin	J.Chem.Cryst.,2010,40,,387	P1	ild; sqc15
OBAWUJ	C25 H29 N1 O2 S1 Se1/Omega=2.12%(Set #6)	N-[(3,3-dimethyl-2-methylene-1',3'-dihydro-1H-spiro[bicyclo[2.2.1]heptane-7,2'-inden]-1-yl)seleno]-p-methylbenzenesulfonamide.	K.Shimada,K.Kodaki,T.Nanae,S.Aoyagi,Y.Takikawa,C.Kabuto	TETRAHEDRON LETT.,2000,41,,6833	P212121	hcp/hexagonal closest packing; 12/3/h1
OBUKIH	C19 H21 N3 O3 S1/Omega=2.33%(Set #8)	N-(7-Ethoxy-2-(prop-2-en-1-yl)-2H-indazol-6-yl)-4-methylbenzenesulfonamide.	N.Abbassi,E.M.Rakib,A.Hannioui,H.Zouihri	ACTA CRYSTALLOGR.,SECT.E:STRUCT.REP.ONLINE,2011,67,,o3211	P21/c	bcu-x/ 14-conn;I m -3 m->C m c m (a-b,a+b,c; 1/4,1/4,1/4);Bond sets: 2,3,4,5:bcu-x
OBUWEP	C11 H15 N1 O6 S1/Omega=4.73%(Set #6)	3-Hydroxy-2-(4-methoxybenzenesulfonamido)butanoic acid.	S.Sinha,H.Osman,H.A.Wahab,M.Hemamalini,H.-K.Fun	ACTA CRYSTALLOGR.,SECT.E:STRUCT.REP.ONLINE,2011,67,,o3275	P212121	fcu/cubic closest packing; 12/3/c1; sqc19
OCAGAB	C19 H16 N6 O4 S1/Omega=1.72%(Set #8)	N-(3-Methoxy-5-methylpyrazin-2-yl)-2-(4-(1,3,4-oxadiazol-2-yl)phenyl)pyridine-3-sulfonamide.	B.Stensland,R.J.Roberts	ACTA CRYSTALLOGR.,SECT.E:STRUCT.REP.ONLINE,2004,60,,o1817	P21/n	fcu/cubic closest packing; 12/3/c1; sqc19
OCAMAH	C39 H42 Br1 N1 O4 S2 Si1/Omega=5.24%(Set #8)	N-((1S,2S,3R)-3-(t-Butyldiphenylsiloxy)-2-bromo-1-phenyl-4-(phenylsulfinyl)butyl)-p-toluenesulfonamide.	K.Ravikumar,G.Y.S.K.Swamy,S.Raghavan,Ch.N.Kumar	ACTA CRYSTALLOGR.,SECT.E:STRUCT.REP.ONLINE,2004,60,,o1880	P21/c	fcu/cubic closest packing; 12/3/c1; sqc19
OCAMUB	C16 H8 N6 O8 S2/Omega=2.70%(Set #6)	9-Dicyanomethylene-4,5-dinitrofluorene-2,7-disulfonamide.	A.S.Batsanov,I.F.Perepichka	ACTA CRYSTALLOGR.,SECT.E:STRUCT.REP.ONLINE,2004,60,,o1892	Pna21	12T18
OCELEP	C14 H12 Cl1 N1 O3 S1/Omega=2.66%(Set #9)	N-(3-Chlorobenzoyl)-2-methylbenzenesulfonamide.	P.A.Suchetan,S.Foro,B.T.Gowda	ACTA CRYSTALLOGR.,SECT.E:STRUCT.REP.ONLINE,2011,67,,o3489	C2/c	bcu-x/ 14-conn;I m -3 m->P 42/n m c (a,b,2c; 1/4,1/4,1/4);Bond sets: 1,2,4,5:bcu-x
OCEQOE	C13 H10 N2 O5 S1/Omega=2.07%(Set #7)	N-Benzoyl-3-nitrobenzenesulfonamide.	P.A.Suchetan,S.Foro,B.T.Gowda	ACTA CRYSTALLOGR.,SECT.E:STRUCT.REP.ONLINE,2011,67,,o3515	P21/c	hcp/hexagonal closest packing; 12/3/h1
ODEPUJ	C12 H9 Cl2 N1 O2 S1/Omega=3.31%(Set #7)	4,4'-Dichlorobenzenesulfonamidobenzene.	T.Gelbrich,M.B.Hursthouse,T.L.Threlfall	ACTA CRYSTALLOGR.,SECT.B:STRUCT.SCI.,2007,63,,621	R-3	12T23
OFEKEQ	C11 H9 N3 O4 S1/Omega=3.94%(Set #7)	4-Nitro-N-(4-pyridyl)benzenesulfonamide.	Hai-Jun Yu,Jiang-Sheng Li	ACTA CRYSTALLOGR.,SECT.E:STRUCT.REP.ONLINE,2007,63,,o3399	P21/c	fcu/cubic closest packing; 12/3/c1; sqc19
OHAWUP	C22 H24 Cl1 N1 O3 S1/Omega=2.74%(Set #6)	syn-N-((4-Chlorophenyl)-(2-oxocyclo-oct-3-enyl)methyl)-4-methylbenzenesulfonamide.	Min Shi,Yong-Mei Xu,Gui-Ling Zhao,Xiao-Feng Wu	EUR.J.ORG.CHEM.,2002,,,3666	Pna21	bcu-x/ 14-conn;I m -3 m->I 41/a c d (2a,2b,2c; 1/2,1/2,1/2);Bond sets: 1,2,3,5,6:bcu-x
OJOPAF	C22 H20 N2 O2 S1/Omega=5.32%(Set #6)	N-(3-(1H-Indol-3-yl)-4-methylphenyl)-4-methylbenzenesulfonamide.	Linfei Wang,Zhaomeng Han,Renhua Fan	ADV.SYNTH.CATAL.,2010,352,,3230	P212121	fcu/cubic closest packing; 12/3/c1; sqc19
OKEWEG	C16 H28 N2 O6 S1 Si1/Omega=3.66%(Set #6)	3-Butoxycarbonyl-4-(2-(trimethylsilyl)ethylsulfonamido)cyclopentene[c][1,3]oxazolidin-2-one.	K.J.Hale,M.M.Domostoj,D.A.Tocher,E.Irving,F.Scheinmann	Org.Lett.,2003,5,,2927	P212121	fcu/cubic closest packing; 12/3/c1; sqc19
ONOCAW	C11 H15 N1 O4 S1/Omega=4.19%(Set #7)	N-(3-(2-Furyl)-2-hydroxyprop-2-en-1-ylidene)-2-methylpropane-2-sulfonamide.	Longwu Ye,Weimin He,Liming Zhang	Angew.Chem.,Int.Ed.,2011,50,,3236	P21/c	12T56
OPEKOK	C13 H14 N2 O3 S1/Omega=4.03%(Set #7)	N-(4-Amino-2-phenoxyphenyl)methanesulfonamide.	A.Bhattacharya,S.Ghosh,K.Kankanala,V.R.Reddy,K.Mukkanti,S.Pal,A.K.Mukherjee	CHEM.PHYS.LETT.,2010,493,,151	P21/a	hcp/hexagonal closest packing; 12/3/h1
OPEKUQ	C21 H16 N2 O5 S1/Omega=4.35%(Set #9)	N-(4-(1,3-Dioxo-1,3-dihydro-2H-isoindol-2-yl)-2-phenoxyphenyl)methanesulfonamide.	A.Bhattacharya,S.Ghosh,K.Kankanala,V.R.Reddy,K.Mukkanti,S.Pal,A.K.Mukherjee	CHEM.PHYS.LETT.,2010,493,,151	P-1	12T62
OTONUH	C9 H24 N4 O6 S3/Omega=4.37%(Set #8)	N,N,N-tris(2-(methanesulfonamido)ethyl)amine.	A.D.Schwarz,K.R.Herbert,C.Paniagua,P.Mountford	Organometallics,2010,29,,4171	P21/c	fcu/cubic closest packing; 12/3/c1; sqc19
PAHPAQ	C20 H18 N2 O3 S1/Omega=3.47%(Set #10)	N-(2-((Hydroxyimino)(phenyl)methyl)phenyl)-p-toluenesulfonamide.	S.Parsons,C.Squires,P.Tasker,A.Parkin,P.A.Wood	PRIVATE COMMUNICATION,2004,,,	P-1	fcu/cubic closest packing; 12/3/c1; sqc19
PAHQAR	C20 H18 N2 O3 S1/Omega=1.37%(Set #8)	N-(2-((Hydroxyimino)(phenyl)methyl)phenyl)-p-toluenesulfonamide.	S.Parsons,C.Squires,P.Tasker,P.A.Wood	PRIVATE COMMUNICATION,2004,,,	P21/c	12T44
PALPUP	C49 H42 Br1 N1 O3 S1/Omega=1.96%(Set #8)	N-((4-Bromophenyl)(2-oxo-6-(1,1,5,5-tetraphenylpent-4-en-2-yn-1-yl)cyclohexyl)methyl)-4-methylbenzenesulfonamide.	Bei-Li Lu,Jian-Mei Lu,Min Shi	EUR.J.ORG.CHEM.,2012,,,587	P21/n	12T8
PANHAO	C18 H11 Cl2 F3 N4 O3 S1/Omega=4.75%(Set #9)	1-(2,6-Dichloro-4-(trifluoromethyl)phenyl)-5-(4-methoxyphenylsulfonamido)-1H-pyrazole-3-carbonitrile.	Xiao-Hong Zhang,Ping Zhong,Hong-Ping Xiao,Mao-Lin Hu	ACTA CRYSTALLOGR.,SECT.E:STRUCT.REP.ONLINE,2005,61,,o2134	P-1	fcu/cubic closest packing; 12/3/c1; sqc19
PAVBUL	C14 H14 N2 O3 S1/Omega=2.81%(Set #8)	4-((4-Methoxybenzylidene)amino)benzenesulfonamide.	O.G.Idemudia,A.P.Sadimenko,A.J.Afolayan,E.C.Hosten	ACTA CRYSTALLOGR.,SECT.E:STRUCT.REP.ONLINE,2012,68,,o1599	P21/c	12T44
PEBGIO	C30 H29 N1 O3 S1/Omega=4.16%(Set #6)	4-Methyl-N-(2,4,5-triphenyltetrahydro-2H-pyran-2-yl)benzenesulfonamide.	C.Simal,T.Lebl,A.M.Z.Slawin,A.D.Smith	Angew.Chem.,Int.Ed.,2012,51,,3653	P212121	fcu/cubic closest packing; 12/3/c1; sqc19
PELZOV	C17 H25 N1 O4 S2/Omega=1.77%(Set #9)	5-Methyl-5-p-toluenesulfonamido-8,8-dimethyl-3-oxo-2,3-oxathiabicyclo(4.3.0)nonane.	C.M.Marson,P.R.Giles,H.Adams,N.A.Bailey	CHEM.COMMUN.,1993,,,1195	P-1	hcp/hexagonal closest packing; 12/3/h1
PEMYOV	C13 H13 N1 O3 S1/Omega=4.52%(Set #9)	N-(3-Hydroxyphenyl)-p-toluenesulfonamide.	S.Goswami,A.K.Mahapatra,G.D.Nigam,K.Chinnakali,Hoong-Kun Fun	ACTA CRYSTALLOGR.,SECT.C:CRYST.STRUCT.COMMUN.,1998,54,,1301	C2/c	12T63
PEPRIM	C14 H21 N1 O3 S1/Omega=2.41%(Set #6)	N-(1S,2S)-2-ethyl-2-hydroxycyclobutylmethyl 4-methylbenzenesulfonamide.	S.Baktharaman,S.Selvakumar,V.K.Singh	Org.Lett.,2006,8,,4335	P212121	12T5
PIXXAW	C18 H16 N1 O2 P1 S2/Omega=3.91%(Set #8)	N-(Diphenylphosphorothioyl)benzenesulfonamide.	A.Pop,A.Rotar,C.Rat,A.Silvestru	INORG.CHIM.ACTA,2008,361,,255	P21/c	bcu-x/ 14-conn;I m -3 m->I b c a (a+b,c,2a-2b; 3/4,1/4,1/4);Bond sets: 1,2,3,5,6:bcu-x
PODQAB	C15 H16 N2 O3 S1/Omega=2.66%(Set #8)	2-((3,4-Dimethylphenyl)carbamoyl)benzenesulfonamide.	W.A.Siddiqui,S.Ahmad,H.L.Siddiqui,M.Parvez	ACTA CRYSTALLOGR.,SECT.C:CRYST.STRUCT.COMMUN.,2008,64,,o367	P21/c	12T64
POPJUA01	C17 H15 N3 O4 S1/Omega=3.22%(Set #8)	4-((2-Hydroxybenzylidene)amino)-N-(5-methyl-1,2-oxazol-3-yl)benzenesulfonamide.	S.Ebenezer,P.T.Muthiah	ACTA CRYSTALLOGR.,SECT.E:STRUCT.REP.ONLINE,2010,66,,o2574	P21/c	hcp/hexagonal closest packing; 12/3/h1
PUFHUU	C15 H15 Br1 N2 O3 S1/Omega=1.98%(Set #6)	4-(2-((5-Bromo-2-hydroxybenzylidene)amino)ethyl)benzenesulfonamide.	Z.H.Chohan,H.A.Shad,M.N.Tahir,K.H.Thebo	ACTA CRYSTALLOGR.,SECT.E:STRUCT.REP.ONLINE,2009,65,,o2450	Pna21	12T65
PUFJIK	C8 H9 N1 O4 S1/Omega=2.78%(Set #10)	2-Methanesulfonamidobenzoic acid.	M.Shafiq,M.Zia-ur-Rehman,I.U.Khan,M.N.Arshad,I.Ahmad	ACTA CRYSTALLOGR.,SECT.E:STRUCT.REP.ONLINE,2009,65,,o2453	P-1	fcu/cubic closest packing; 12/3/c1; sqc19
PUGNUB	C15 H15 N1 O4 S1/Omega=2.49%(Set #6)	2-(4-Methylbenzenesulfonamido)-2-phenylacetic acid.	I.Mariam,M.Akkurt,S.Sharif,N.Akhtar,I.U.Khan	ACTA CRYSTALLOGR.,SECT.E:STRUCT.REP.ONLINE,2009,65,,o2797	P212121	fcu/cubic closest packing; 12/3/c1; sqc19
PUTSIH	C11 H16 N2 O4 S2/Omega=3.87%(Set #9)	N-((1-(Methylsulfonyl)-2,3-dihydro-1H-indol-2-yl)methyl)methanesulfonamide.	F.C.Sequiera,B.W.Turnpenny,S.R.Chemler	Angew.Chem.,Int.Ed.,2010,49,,6365	P-1	hcp/hexagonal closest packing; 12/3/h1
PUVJAS	C22 H19 Br1 N2 O5 S1/Omega=3.49%(Set #6)	(R,R)-N-(2-Bromo-1-(3-nitrophenyl)-3-oxo-3-phenylpropyl)-4-methylbenzenesulfonamide.	Yunfei Cai,Xiaohua Liu,Yanghai Hui,Jun Jiang,Wentao Wang,Weiliang Chen,Lili Lin,Xiaoming Feng	Angew.Chem.,Int.Ed.,2010,49,,6160	P21	fcu/cubic closest packing; 12/3/c1; sqc19
QAJPIC	C13 H11 Cl2 N1 O2 S1/Omega=3.42%(Set #8)	N-(2,5-Dichlorophenyl)-4-methylbenzenesulfonamide.	K.Shakuntala,S.Foro,B.T.Gowda	ACTA CRYSTALLOGR.,SECT.E:STRUCT.REP.ONLINE,2011,67,,o40	P21/c	bcu-x/ 14-conn;I m -3 m->C m c m (a-b,a+b,c; 1/4,1/4,1/4);Bond sets: 2,3,4,5:bcu-x
QAJZOS	C13 H11 Cl2 N1 O2 S1/Omega=3.26%(Set #8)	N-(3,4-Dichlorophenyl)-4-methylbenzenesulfonamide.	K.Shakuntala,S.Foro,B.T.Gowda	ACTA CRYSTALLOGR.,SECT.E:STRUCT.REP.ONLINE,2011,67,,o104	P21/c	bcu-x/ 14-conn;I m -3 m->C m c m (a-b,a+b,c; 1/4,1/4,1/4);Bond sets: 2,3,4,5:bcu-x
QAKHIV	C13 H11 Cl2 N1 O2 S1/Omega=3.09%(Set #7)	N-(2,6-Dichlorophenyl)-4-methylbenzenesulfonamide.	K.Shakuntala,S.Foro,B.T.Gowda	ACTA CRYSTALLOGR.,SECT.E:STRUCT.REP.ONLINE,2011,67,,o142	P21/n	bcu-x/ 14-conn;I m -3 m->P 21/c (1/2a+1/2b+1/2c,-a+b,-a-b+c; 1/2,0,0);Bond sets: 1,2,3,5,7,8,9:bcu-x
QAKPUP	C14 H15 N1 O3 S1/Omega=2.30%(Set #6)	N-(4-Methoxyphenyl)-4-methylbenzenesulfonamide.	M.Akkurt,I.Mariam,I.Naseer,I.U.Khan,S.Sharif	ACTA CRYSTALLOGR.,SECT.E:STRUCT.REP.ONLINE,2011,67,,o186	P21	fcu/cubic closest packing; 12/3/c1; sqc19
QAKXUX	C18 H18 N6 O2 S1/Omega=2.96%(Set #9)	4-((4-(bis(2-cyanoethyl)amino)phenyl)diazenyl)benzenesulfonamide.	G.Gervasio,D.Marabello,F.Bertolotti	ACTA CRYSTALLOGR.,SECT.E:STRUCT.REP.ONLINE,2011,67,,o231	P-1	12T66
QAMTIH	C16 H20 N2 O4 S2/Omega=6.63%(Set #4)	N,N'-Ethylenebis(p-toluenesulfonamide).	A.S.Gajadhar-Plummer,I.A.Kahwa,J.T.Mague	ACTA CRYSTALLOGR.,SECT.E:STRUCT.REP.ONLINE,2001,57,,o68	P21/c	fcu/cubic closest packing; 12/3/c1; sqc19
QASNEF	C23 H26 N1 O3 P1 S1/Omega=3.25%(Set #9)	4-Butyl-N-((2-methoxyphenyl)(phenyl)phosphino)benzenesulfonamide.	F.W.Patureau,M.A.Siegler,A.L.Spek,A.J.Sandee,S.Juge,S.Aziz,A.Berkessel,J.N.H.Reek	EUR.J.INORG.CHEM.,2012,,,496	P-1	12T66
QEDGOX	C13 H12 N2 O4 S1/Omega=4.28%(Set #8)	N-(4-Methylphenyl)-2-nitrobenzenesulfonamide.	U.Chaithanya,S.Foro,B.T.Gowda	ACTA CRYSTALLOGR.,SECT.E:STRUCT.REP.ONLINE,2012,68,,o2745	P21/c	12T53
QEDLAO	C25 H29 Br1 N4 O3 S2/Omega=4.63%(Set #8)	N-(2-((5-Bromo-2-(piperidin-1-yl)pyrimidin-4-yl)sulfanyl)-4-methoxyphenyl)-2,4,6-trimethylbenzenesulfonamide.	M.Kumar,L.Mallesha,M.A.Sridhar,K.Kapoor,V.K.Gupta,R.Kant	ACTA CRYSTALLOGR.,SECT.E:STRUCT.REP.ONLINE,2012,68,,o2767	P21/n	fcu/cubic closest packing; 12/3/c1; sqc19
QEDQOH	C21 H20 Br1 Cl1 N4 O4 S2/Omega=3.70%(Set #7)	N-(2-((5-Bromo-2-(morpholin-4-yl)pyrimidin-4-yl)sulfanyl)-4-methoxyphenyl)-4-chlorobenzenesulfonamide.	M.Kumar,L.Mallesha,M.A.Sridhar,K.Kapoor,V.K.Gupta,R.Kant	ACTA CRYSTALLOGR.,SECT.E:STRUCT.REP.ONLINE,2012,68,,o2800	P21/n	hcp/hexagonal closest packing; 12/3/h1
QIKMIG	C14 H21 N1 O3 S3/Omega=2.57%(Set #6)	N-(2-Hydroxy-4,4-bis(methylsulfanyl)cyclopentyl)-4-methylbenzenesulfonamide.	G.Harms,E.Schaumann,G.Adiwidjaja	SYNTHESIS,2001,,,577	P212121	fcu/cubic closest packing; 12/3/c1; sqc19
QOQKUD	C36 H29 N1 O2 S1/Omega=2.87%(Set #10)	N-((1-(Diphenylmethylene)-3-phenyl-1H-inden-2-yl)methyl)-4-methylbenzenesulfonamide.	Jian-Mei Lu,Zhi-Bin Zhu,Min Shi	Chem.-Eur.J.,2009,15,,963	P-1	fcu/cubic closest packing; 12/3/c1; sqc19
QORSOG	C16 H15 N3 O5 S1/Omega=4.08%(Set #8)	N-(6-(((2E)-2-Benzylidenehydrazinyl)carbonyl)-1,3-benzodioxol-5-yl)methanesulfonamide.	J.L.M.Tributino,C.D.Duarte,R.S.Correa,A.C.Doriguetto,J.Ellena,N.C.Romeiro,N.G.Castro,A.L.P.Miranda,E.J.Barreiro,C.A.M.Fraga	BIOORG.MED.CHEM.,2009,17,,1125	P21/c	12T67
QOSQAQ	C30 H42 N2 O6 S1/Omega=2.53%(Set #6)	2-t-Butyloxycarbonyl-7-hydroxy-7-benzyloxyethyl-8-p-toluenesulfonamide-heptahydroisoquinoline.	J.S.Clark,R.J.Townsend,A.J.Blake,S.J.Teat,A.Johns	TETRAHEDRON LETT.,2001,42,,3235	P21	ild; sqc15
QOTMUI	C14 H13 N1 O4 S1/Omega=2.45%(Set #6)	(2R)-2-Benzenesulfonamido-2-phenylethanoic acid.	M.N.Arshad,M.N.Tahir,I.U.Khan,M.Shafiq,S.Ahmad	ACTA CRYSTALLOGR.,SECT.E:STRUCT.REP.ONLINE,2009,65,,o940	P212121	fcu/cubic closest packing; 12/3/c1; sqc19
QOTMUI01	C14 H13 N1 O4 S1/Omega=3.30%(Set #6)	(2R)-2-Benzenesulfonamido-2-phenylethanoic acid.	I.U.Khan,S.Sharif,M.N.Arshad,Ejaz,M.Idrees	ACTA CRYSTALLOGR.,SECT.E:STRUCT.REP.ONLINE,2009,65,,o2436	P21	fcu/cubic closest packing; 12/3/c1; sqc19
QQQAUD01	C11 H13 Cl1 F3 N3 O4 S3/Omega=4.34%(Set #6)	6-Chloro-2-methyl-3-(((2,2,2-trifluoroethyl)sulfanyl)methyl)-3,4-dihydro-2H-1, 2,4-benzothiadiazine-7-sulfonamide 1,1-dioxide.	T.Gelbrich,M.F.Haddow,U.J.Griesser	ACTA CRYSTALLOGR.,SECT.E:STRUCT.REP.ONLINE,2010,66,,o1663	Cc	12T68
QQQAUG15	C7 H6 Cl1 N3 O4 S2/Omega=2.59%(Set #6)	6-Chloro-4H-1,2,4-benzothiadiazine-7-sulfonamide 1,1-dioxide.	I.D.H.Oswald,A.R.Lennie,C.R.Pulham,K.Shankland	CRYSTENGCOMM,2010,12,,2533	P1	ild; sqc15
QQQAUG16	C7 H6 Cl1 N3 O4 S2/Omega=2.55%(Set #6)	6-Chloro-4H-1,2,4-benzothiadiazine-7-sulfonamide 1,1-dioxide.	I.D.H.Oswald,A.R.Lennie,C.R.Pulham,K.Shankland	CRYSTENGCOMM,2010,12,,2533	P1	fcu/cubic closest packing; 12/3/c1; sqc19
QQQAUG17	C7 H6 Cl1 N3 O4 S2/Omega=2.65%(Set #6)	6-Chloro-4H-1,2,4-benzothiadiazine-7-sulfonamide 1,1-dioxide.	I.D.H.Oswald,A.R.Lennie,C.R.Pulham,K.Shankland	CRYSTENGCOMM,2010,12,,2533	P1	fcu/cubic closest packing; 12/3/c1; sqc19
QUYTIO	C13 H14 N2 O4 S2/Omega=2.89%(Set #6)	4,4'-methylenebis(benzenesulfonamide).	T.Gelbrich,M.F.Haddow,U.J.Griesser	ACTA CRYSTALLOGR.,SECT.E:STRUCT.REP.ONLINE,2010,66,,o1619	P21	12T69
QUYYEP	C12 H8 Cl3 N1 O2 S1/Omega=2.73%(Set #8)	2,4-Dichloro-N-(2-chlorophenyl)benzenesulfonamide.	B.T.Gowda,S.Foro,P.G.Nirmala,H.Fuess	ACTA CRYSTALLOGR.,SECT.E:STRUCT.REP.ONLINE,2010,66,,o1641	Pbcn	12T70
QUZHEZ	C15 H17 N1 O3 S1/Omega=3.25%(Set #8)	N-(3-Ethoxyphenyl)-4-methylbenzenesulfonamide.	Aziz-ur-Rehman,A.Siddiqa,M.Akkurt,M.A.Abbasi,M.Jahangir,I.U.Khan	ACTA CRYSTALLOGR.,SECT.E:STRUCT.REP.ONLINE,2010,66,,o1682	P21/c	bcu-x/ 14-conn;I m -3 m->C m c m (a-b,a+b,c; 1/4,1/4,1/4);Bond sets: 2,3,4,5:bcu-x
QUZLAZ	C13 H11 Cl2 N1 O2 S1/Omega=3.82%(Set #8)	4-Chloro-N-(3-chlorophenyl)-2-methylbenzenesulfonamide.	B.T.Gowda,S.Foro,P.G.Nirmala,H.Fuess	ACTA CRYSTALLOGR.,SECT.E:STRUCT.REP.ONLINE,2010,66,,o1702	P21/c	12T27
RATKIH	C20 H23 N1 O2 S1/Omega=3.31%(Set #7)	N-(2-(Bicyclo(2.2.1)hept-2-yl)phenyl)-4-methylbenzenesulfonamide.	L.Ackermann,K.Polborn	PRIVATE COMMUNICATION,2005,,,	P21/c	hcp/hexagonal closest packing; 12/3/h1
RAWCUP	C25 H24 N2 O5 S2/Omega=3.66%(Set #10)	N-(2-(6-Benzoyl-5-methyl-1-(methylsulfonyl)-1H-indol-2-yl)-4-methylphenyl)methanesulfonamide.	A.Nakhi,B.Prasad,U.Reddy,R.M.Rao,S.Sandra,R.Kapavarapu,D.Rambabu,G.R.Krishna,C.M.Reddy,K.Ravada,P.Misra,J.Iqbal,M.Pal	MedChemComm,2011,2,,1006	P-1	12T15
RAWMAF	C24 H23 Br1 N2 O5 S1/Omega=2.63%(Set #6)	N-((2S,3R,4R)-2-(3-Bromophenyl)-3-nitro-3,4-dihydro-2H-chromen-4-yl)-2,4,6-trimethylbenzenesulfonamide.	Wenduan Hou,Bo Zheng,Jun Chen,Yungui Peng	Org.Lett.,2012,14,,2378	P21	12T11
RAXXUL	C22 H22 F1 N1 O5 S1/Omega=2.61%(Set #6)	N-((2-Fluorophenyl)(2-hydroxy-4,6-dimethoxyphenyl)methyl)-4-methylbenzenesulfonamide.	Guo-Xing Li,Jin Qu	CHEM.COMMUN.,2012,48,,5518	P212121	fcu/cubic closest packing; 12/3/c1; sqc19
RIBQAV	C15 H16 N4 O5 S1/Omega=2.83%(Set #7)	anti,anti-4-(1,3-Dimethyl-3-phenylureido)-3-nitrobenzenesulfonamide.	Cheol-Min Park,Tetsuro Oie,A.M.Petros,Haichao Zhang,P.M.Nimmer,R.F.Henry,S.W.Elmore	J.AM.CHEM.SOC.,2006,128,,16206	Pbca	12T46
RIBQEZ	C14 H14 N4 O5 S1/Omega=3.53%(Set #8)	syn,syn-4-(1-Methyl-3-phenylureido)-3-nitrobenzenesulfonamide.	Cheol-Min Park,Tetsuro Oie,A.M.Petros,Haichao Zhang,P.M.Nimmer,R.F.Henry,S.W.Elmore	J.AM.CHEM.SOC.,2006,128,,16206	P21/n	12T27
RIQLOT	C13 H15 F3 N4 O3 S2/Omega=1.60%(Set #9)	(+-)-N-(3-(4-Amino-2-oxo-1-(tetrahydro-2-thienyl)-1,2-dihydropyrimidin-5-yl)prop-2-yn-1-yl)-2,2,2-trifluoroethanesulfonamide.	A.K.H.Hirsch,S.Lauw,P.Gersbach,W.B.Schweizer,F.Rohdich,W.Eisenreich,A.Bacher,F.Diederich	ChemMedChem,2007,2,,806	C2/c	12T71
RIYXED	C14 H13 F2 N1 O4 S1/Omega=3.13%(Set #8)	N-(3,4-Difluorophenyl)-3,4-dimethoxybenzenesulfonamide.	H.P.You,B.H.Han,S.K.Kang,C.K.Sung,S.O.Kang	ACTA CRYSTALLOGR.,SECT.E:STRUCT.REP.ONLINE,2008,64,,o994	P21/c	bcu-x/ 14-conn;I m -3 m->C m c m (a-b,a+b,c; 1/4,1/4,1/4);Bond sets: 2,3,4,5:bcu-x
RORROF	C14 H21 N1 O4 S1/Omega=2.79%(Set #6)	(2S,5S,1'S)-5-Hydroxymethyl-2-(1'-p-toluenesulfonamidoethyl)-tetrahydrofuran.	K.Harms,U.Koert,H.Wagner	Z.KRISTALLOGR.,1997,212,,238	P21	fcu/cubic closest packing; 12/3/c1; sqc19
ROZQAZ	C23 H23 N3 O6 S1/Omega=4.50%(Set #6)	(-)-(2S,3S,4R)-2-Hydroxy-3-methyl-4-(nitrophenylsulfonamido)-N,4-diphenylbutanamide.	Yingjie Xu,Gang Lu,S.Matsunaga,M.Shibasaki	Angew.Chem.,Int.Ed.,2009,48,,3353	P212121	12T11
RUHQER	C38 H32 Br1 N1 O2 S1/Omega=4.10%(Set #7)	N-(1-(4-Bromophenyl)-2-(2,2-diphenylvinyl)-4-phenyl-2,4-pentadien-1-yl)-4-methylbenzenesulfonamide.	Jian-Mei Lu,Min Shi	Chem.-Eur.J.,2009,15,,6065	P21/c	12T72
RUJQUJ	C14 H15 N1 O2 S1/Omega=4.91%(Set #8)	4-Methyl-N-(3-methylphenyl)benzenesulfonamide.	P.G.Nirmala,B.T.Gowda,S.Foro,H.Fuess	ACTA CRYSTALLOGR.,SECT.E:STRUCT.REP.ONLINE,2009,65,,o3208	C2/c	12T73
RUJREU	C15 H17 N1 O2 S1/Omega=3.89%(Set #9)	2,4-Dimethyl-N-(2-methylphenyl)benzenesulfonamide.	P.G.Nirmala,B.T.Gowda,S.Foro,H.Fuess	ACTA CRYSTALLOGR.,SECT.E:STRUCT.REP.ONLINE,2009,65,,o3210	P-1	fcu/cubic closest packing; 12/3/c1; sqc19
RUSGOC	C36 H29 N1 O2 S1/Omega=2.87%(Set #8)	(E)-N-(2-(1,2-Diphenylvinyl)-3-phenyl-1H-inden-1-yl)-4-methylbenzenesulfonamide.	Shaoyin Wang,Yuanxun Zhu,Yanguang Wang,Ping Lu	Org.Lett.,2009,11,,2615	C2/c	hcp/hexagonal closest packing; 12/3/h1
RUWQAC	C26 H28 N2 O3 S1/Omega=3.58%(Set #6)	N-(1-Benzyl-3-isobutyl-2-oxo-2,3-dihydro-1H-indol-3-yl)-4-methylbenzenesulfonamide.	T.Bui,M.Borregan,C.F.Barbas III	J.ORG.CHEM.,2009,74,,8935	P212121	fcu/cubic closest packing; 12/3/c1; sqc19
RUXZUG	C17 H21 N1 O3 S1/Omega=4.86%(Set #6)	N-((1S,2R)-2-Hydroxy-1-phenylbutyl)-4-methylbenzenesulfonamide.	M.K.Ghorai,A.Kumar,D.P.Tiwari	J.ORG.CHEM.,2010,75,,137	P21	fcu/cubic closest packing; 12/3/c1; sqc19
RUZJAY	C13 H21 N3 O5 S2/Omega=2.49%(Set #8)	N-(3-Morpholinopropyl)benzene-1,4-disulfonamide.	M.Remko,J.Kozisek,J.Semanova,F.Gregan	J.MOL.STRUCT.,2010,973,,18	P21/n	12T74
SABFOS	C14 H16 N2 O3 S1/Omega=3.10%(Set #9)	4-(2-[(Z)-(5-Methyl-2-furyl)methylideneamino]ethyl)benzenesulfonamide.	K.Mahmood,M.Yaqub,M.N.Tahir,Z.Shafiq,A.M.Qureshi	ACTA CRYSTALLOGR.,SECT.E:STRUCT.REP.ONLINE,2010,66,,o2436	P-1	hcp/hexagonal closest packing; 12/3/h1
SADHEM	C18 H17 N3 O5 S1/Omega=2.85%(Set #8)	4-((2-Hydroxy-3-methoxybenzylidene)amino)-N-(5-methyl-1,2-oxazol-3-yl)benzenesulfonamide.	M.Yildiz,H.Unver,D.Erdener,N.O.Iskeleli	J.Chem.Cryst.,2010,40,,691	P21/c	12T75
SAGXUV	C23 H26 F1 N3 O6 S1/Omega=0.70%(Set #8)	N-(3-[2-(4-Fluorophenoxy)ethyl]-2,4-dioxo-1,3-diazaspiro[4.5]decan-7-yl)-4-methoxybenzenesulfonamide.	M.Vinduvahini,S.Jeyaseelan,J.Shylajakumari,H.D.Revanasiddappa,V.B.Devaru	ACTA CRYSTALLOGR.,SECT.E:STRUCT.REP.ONLINE,2012,68,,o194	P21/c	fcu/cubic closest packing; 12/3/c1; sqc19
SAQQEG	C18 H21 N1 O2 S2/Omega=4.14%(Set #7)	(E)-N-Cyclohexyl-1-phenyl-2-(2-thienyl)vinylsulfonamide.	T.Iwama,T.Kataoka,O.Muraoka,G.Tanabe	TETRAHEDRON,1998,54,,5507	Pbca	bcu-x/ 14-conn;I m -3 m->I b c a (a+b,c,2a-2b; 3/4,1/4,1/4);Bond sets: 1,2,3,5,6:bcu-x
SARBIW	C15 H22 Cl1 N3 O3 S1/Omega=2.47%(Set #7)	(4-Amino-5-chloro-2-methoxysulfonamido)deoxytropine.	S.Collin,D.P.Vercauteren,G.Evrard,F.Durant	J.CHEM.SOC.,PERKIN TRANS.2,1989,,,407	P21/c	bcu-x/ 14-conn;I m -3 m->C m c m (a-b,a+b,c; 1/4,1/4,1/4);Bond sets: 2,3,4,5:bcu-x
SEGYAF	C23 H30 N2 O3 S1/Omega=3.52%(Set #6)	(S,R)-Tetrahydro-\b-carboline camphorsulfonamide.	M.Bandini,A.Melloni,F.Piccinelli,R.Sinisi,S.Tommasi,A.Umani-Ronchi	J.AM.CHEM.SOC.,2006,128,,1424	P212121	12T5
SFDMOX04	C12 H14 N4 O4 S1/Omega=3.42%(Set #9)	4-(4'-Aminobenzenesulfonamido)-2,6-dimethoxypyrimidine.	A.Shvelashvili,M.Tskitishvili,M.Kvitsiani,V.Belsky	PRIVATE COMMUNICATION,2002,,,	P-1	bcu-x/ 14-conn;I m -3 m->P 21/c (1/2a+1/2b+1/2c,2a-2b,-c; 1/2,0,1/2);Bond sets: 1,2,4,5,7,8,9:bcu-x
SIKDIA	C22 H20 N2 O3 S2/Omega=2.87%(Set #6)	(2S,(S)S)-N-(Cyano(2-((4-methylphenyl)sulfinyl)phenyl)methyl)-4-methylbenzenesulfonamide.	J.L.G.Ruano,A.M.Martin-Castro,F.Tato,I.Alonso	J.ORG.CHEM.,2007,72,,5994	P21	bcu-x/ 14-conn;I m -3 m->C m c m (a-b,a+b,c; 1/4,1/4,1/4);Bond sets: 2,3,4,5:bcu-x
SIKHEA	C50 H40 N5 O10 P3 S2/Omega=3.54%(Set #8)	2,2-bis(N-(2-Oxyphenyl)-4-methylbenzenesulfonamide-O)-(4,4:6,6-bis(2',2''-biphenolato)-O,O')-cyclotriphosphazene.	E.W.Ainscough,A.M.Brodie,R.J.Davidson,C.A.Otter	Inorg.Chem.Commun.,2007,10,,1005	P21/n	fcu/cubic closest packing; 12/3/c1; sqc19
SINKOP	C21 H22 F1 N1 O6 S1/Omega=2.49%(Set #9)	Dimethyl9(S)-fluoro-4(S)-(p-toluenesulfonamido)tetracyclo(5.3.0.0^2,10^.0^3,8^)deca-5-ene-5,6-dicarboxylate.	K.A.Potekhin,A.V.Maleev,Yu.T.Struchkov,A.I.Glinskii,V.N.Semerikov,V.V.Zhdankin	DOKL.AKAD.NAUK SSSR(RUSS.)(PROC.NAT.ACAD.SCI.USSR),1990,311,,373	P-1	bcu-x/ 14-conn;I m -3 m->P 21/c (1/2a+1/2b+1/2c,2a-2b,-c; 1/2,0,1/2);Bond sets: 1,2,4,5,7,8,9:bcu-x
SITKEM	C16 H17 Cl1 N2 O4 S1/Omega=3.47%(Set #6)	N-(2-Chloro-2-nitro-1-phenylpropyl)-4-methylbenzenesulfonamide.	Sanjun Zhi,Tengfei Li,Guanghui An,Yi Pan	ACTA CRYSTALLOGR.,SECT.E:STRUCT.REP.ONLINE,2008,64,,o357	Pbca	bcu-x/ 14-conn;I m -3 m->I b c a (a+b,c,2a-2b; 3/4,1/4,1/4);Bond sets: 1,2,3,5,6:bcu-x
SITRUJ	C12 H23 N1 O2 S1/Omega=2.59%(Set #6)	N-(6,6-Dimethylbicyclo(3.1.0)hexan-2-yl)-2-methylpropane-2-sulfonamide.	D.M.Hodgson,P.G.Humphreys,S.M.Miles,C.A.J.Brierley,J.G.Ward	J.ORG.CHEM.,2007,72,,10009	Pna21	fcu/cubic closest packing; 12/3/c1; sqc19
SIWMIV	C18 H30 F3 N1 O5 S1/Omega=2.62%(Set #6)	(2R,3R)-N-(3-t-Butoxy-4,4,4-trifluoro-1-hydroxybutan-2-yl)-1-(7,7-dimethyl-2-oxobicyclo[2.2.1]hept-1-yl)methanesulfonamide.	Nu Xiao,Zhong-Xing Jiang,Y.B.Yu	BIOPOLYMERS,2007,88,,781	P212121	hcp/hexagonal closest packing; 12/3/h1
SIZBUZ	C18 H30 F3 N1 O5 S1/Omega=2.56%(Set #6)	(2S,3S)-N-(3-tert-Butoxy-4,4,4-trifluoro-1-hydroxybutan-2-yl)-1-(7,7-dimethyl-2-oxobicyclo[2.2.1]hept-1-yl)methanesulfonamide.	Nu Xiao,Zhong-Xing Jiang,Y.B.Yu	BIOPOLYMERS,2007,88,,781	P212121	hcp/hexagonal closest packing; 12/3/h1
SLFNMB03	C10 H11 N3 O3 S1/Omega=3.56%(Set #8)	3-(4'-Aminobenzenesulfonamido)-5-methylisoxazole.	J.Rambaud,R.Roques,S.Alberola,F.Sabon	BULL.SOC.CHIM.FR.,1980,,,56-1	C2/c	fcu/cubic closest packing; 12/3/c1; sqc19
SLFNMD10	C12 H14 N4 O2 S1/Omega=2.84%(Set #7)	4-Amino-N-(4,6-dimethyl-2-pyrimidinyl)-benzenesulfonamide.	R.K.Tiwari,M.Haridas,T.P.Singh	ACTA CRYSTALLOGR.,SECT.C:CRYST.STRUCT.COMMUN.,1984,40,,655	P21/c	12T76
SOLYOI	C8 H8 I1 N1 O4 S1/Omega=1.52%(Set #9)	2-(2-Iodobenzenesulfonamido)acetic acid.	M.N.Arshad,I.U.Khan,M.Shafiq,A.Mukhtar	ACTA CRYSTALLOGR.,SECT.E:STRUCT.REP.ONLINE,2009,65,,o549	P-1	fcu/cubic closest packing; 12/3/c1; sqc19
SOYPAY	C11 H15 N1 O4 S1/Omega=4.03%(Set #6)	(2S)-Methyl 2-(p-toluenesulfonamido)propanoate.	T.Syed,S.Hameed,P.G.Jones,A.Schmidt-Meier	ACTA CRYSTALLOGR.,SECT.E:STRUCT.REP.ONLINE,2009,65,,o1300	P212121	hcp/hexagonal closest packing; 12/3/h1
SULAMD07	C6 H8 N2 O2 S1/Omega=3.93%(Set #7)	4-Aminobenzenesulfonamide.	M.B.Hursthouse,T.L.Threlfall,S.J.Coles,S.C.Ward	University of Southampton, Crystal Structure Report Archive,1998,,,	P21/c	hcp/hexagonal closest packing; 12/3/h1
SULAMD08	C6 H8 N2 O2 S1/Omega=1.50%(Set #7)	4-Aminobenzenesulfonamide.	M.B.Hursthouse,T.L.Threlfall,S.J.Coles,S.C.Ward	University of Southampton, Crystal Structure Report Archive,1999,,,	Pbca	12T19
SULAMD09	C6 H8 N2 O2 S1/Omega=3.32%(Set #8)	4-Aminobenzenesulfonamide.	M.B.Hursthouse,T.L.Threlfall,S.J.Coles,S.C.Ward	University of Southampton, Crystal Structure Report Archive,1999,,,	P21/c	fcu/cubic closest packing; 12/3/c1; sqc19
SULDAZ02	C10 H10 N4 O2 S1/Omega=3.90%(Set #8)	4-Amino-N-(2-pyrimidinyl)-benzenesulfonamide.	M.K.Kokila,Puttaraja,M.V.Kulkarni,S.Thampi	ACTA CRYSTALLOGR.,SECT.C:CRYST.STRUCT.COMMUN.,1995,51,,333	P21/c	12T77
SULDAZ03	C10 H10 N4 O2 S1/Omega=3.43%(Set #8)	4-Amino-N-(2-pyrimidinyl)benzenesulfonamide.	P.A.Ajibade,G.A.Kolawole,P.O'Brien,M.Helliwell,J.Raftery	INORG.CHIM.ACTA,2006,359,,3111	P21/c	12T77
SULNUJ	C18 H23 N1 O4 S1/Omega=4.93%(Set #6)	N-(4-Hydroxy-3-(1-hydroxy-3-methylbutan-2-yl)phenyl)-4-methylbenzenesulfonamide.	K.L.Jensen,P.T.Franke,L.T.Nielsen,K.Daasbjerg,K.A.Jorgensen	Angew.Chem.,Int.Ed.,2010,49,,129	P21	fcu/cubic closest packing; 12/3/c1; sqc19
SULTAM	C10 H14 N2 O4 S2/Omega=4.09%(Set #6)	Benzenesulfonamide-p-(tetrahydro-2H-1,2-thiazin-2-yl)-S,S-dioxide.	J.Aupers,C.H.Carlisle,P.F.Lindley	ACTA CRYSTALLOGR.,SECT.B:STRUCT.CRYSTALLOGR.CRYST.CHEM.,1974,30,,1228	Pca21	gsp1
SULTAM01	C10 H14 N2 O4 S2/Omega=4.57%(Set #6)	Benzenesulfonamide-p-(tetrahydro-2H-1,2-thiazin-2-yl)-S,S-dioxide.	A.Camerman,N.Camerman	CAN.J.CHEM.,1975,53,,2194	Pca21	gsp1
SUQTUT	C23 H26 N2 O3 S3/Omega=3.06%(Set #8)	N-(2-Methoxyethyl)-N-(2,3,4,9-tetrahydrospiro(1H-carbazole-1,2-(1,3)dithiolane)-4-yl)-benzenesulfonamide.	S.Patir,G.Okay,A.Gulce,B.Salih,T.Hokelek	J.HETEROCYCL.CHEM.,1997,34,,1239	P21/n	bcu-x/ 14-conn;I m -3 m->C m c m (a-b,a+b,c; 1/4,1/4,1/4);Bond sets: 2,3,4,5:bcu-x
SUVGUL	C15 H21 N3 O3 S1/Omega=4.13%(Set #7)	N-((Perhydrocyclopenta(c)pyrrol-2-yl)aminocarbonyl)-p-toluenesulfonamide.	M.Parvez,M.S.Arayne,M.K.Zaman,N.Sultana	ACTA CRYSTALLOGR.,SECT.C:CRYST.STRUCT.COMMUN.,1999,55,,74	P21/n	fcu/cubic closest packing; 12/3/c1; sqc19
SUWZEQ	C30 H26 N2 O5 S2/Omega=2.80%(Set #6)	4-Methyl-N-((4-(((4-methylphenyl)sulfonyl)amino)-2-phenyl-4H-chromen-3-yl)methylene)benzenesulfonamide.	J.Aleman,A.Nunez,L.Marzo,V.Marcos,C.Alvarado,J.L.G.Ruano	Chem.-Eur.J.,2010,16,,9453	P212121	fcu/cubic closest packing; 12/3/c1; sqc19
SUWZIU	C23 H19 N1 O4 S1/Omega=3.92%(Set #9)	(E)-N-((S)-3-Formyl-2-phenyl-4H-chromen-4-yl)-4-methylbenzenesulfonamide.	J.Aleman,A.Nunez,L.Marzo,V.Marcos,C.Alvarado,J.L.G.Ruano	Chem.-Eur.J.,2010,16,,9453	P-1	bcu-x/ 14-conn;I m -3 m->P 21/c (1/2a+1/2b+1/2c,2a-2b,-c; 1/2,0,1/2);Bond sets: 1,2,4,5,7,8,9:bcu-x
SUZRUB	C15 H17 N1 O2 S1/Omega=5.32%(Set #6)	4-Methyl-N-[(S)-1-phenylethyl]benzenesulfonamide.	Z.Kelesoglu,Z.Gultekin ,O.Buyukgungor	ACTA CRYSTALLOGR.,SECT.E:STRUCT.REP.ONLINE,2010,66,,o2363	P21	hcp/hexagonal closest packing; 12/3/h1
TAPSIO	C22 H19 I1 N2 O5 S1/Omega=3.14%(Set #6)	N-(2-Iodo-1-(3-nitrophenyl)-3-oxo-3-phenylpropyl)-4-methylbenzenesulfonamide.	Yunfei Cai,Xiaohua Liu,Jun Li,Weiliang Chen,Wentao Wang,Lili Lin,Xiaoming Feng	Chem.-Eur.J.,2011,17,,14916	P21	fcu/cubic closest packing; 12/3/c1; sqc19
TAQLON	C26 H33 N3 O6 S3/Omega=2.11%(Set #6)	1,1,1-tris(p-Toluenesulfonamidomethyl)ethane.	P.Tasker,A.Parkin,C.Squires,S.Parsons,D.Messenger	PRIVATE COMMUNICATION,2005,,,	Pna21	fcu/cubic closest packing; 12/3/c1; sqc19
TECHAL	C18 H11 Cl2 F3 N4 O2 S1/Omega=4.38%(Set #9)	1-(2,6-Dichloro-4-(trifluoromethyl)phenyl)-5-(4-methylphenylsulfonamido)-1H-pyrazole-3-carbonitrile.	Ping Zhong,Xiao-Hong Zhang,Hong-Ping Xiao,Mao-Lin Hu	ACTA CRYSTALLOGR.,SECT.E:STRUCT.REP.ONLINE,2006,62,,o513	P-1	fcu/cubic closest packing; 12/3/c1; sqc19
TELZUF	C17 H17 N3 O3 S1/Omega=3.32%(Set #8)	N-(2-(1-Hydrazonoethyl)-3-benzofuranyl)-p-toluenesulfonamide.	F.Bachechi,V.M.Coiro,M.Delfini	ACTA CRYSTALLOGR.,SECT.C:CRYST.STRUCT.COMMUN.,1996,52,,2915	P21/n	fcu/cubic closest packing; 12/3/c1; sqc19
TEQZAR	C13 H13 N1 O3 S1/Omega=3.01%(Set #6)	M-(-)-N-Phenyl-4-methoxybenzenesulfonamide.	T.Kato,I.Okamoto,A.Tanatani,T.Hatano,M.Uchiyama,H.Kagechika,H.Masu,K.Katagiri,M.Tominaga,K.Yamaguchi,I.Azumaya	Org.Lett.,2006,8,,5017	P212121	fcu/cubic closest packing; 12/3/c1; sqc19
TEWCEE	C13 H13 N1 O3 S1/Omega=2.98%(Set #6)	P-(+)-N-Phenyl-4-methoxybenzenesulfonamide.	T.Kato,I.Okamoto,A.Tanatani,T.Hatano,M.Uchiyama,H.Kagechika,H.Masu,K.Katagiri,M.Tominaga,K.Yamaguchi,I.Azumaya	Org.Lett.,2006,8,,5017	P212121	fcu/cubic closest packing; 12/3/c1; sqc19
TIBPAW	C6 H6 N2 O4 S1/Omega=4.33%(Set #6)	2-Nitrobenzenesulfonamide.	Hua-Long Cheng,Shu-Qin Zhang,Chun-Fang Huang	ACTA CRYSTALLOGR.,SECT.E:STRUCT.REP.ONLINE,2007,63,,o1979	Cc	hcp/hexagonal closest packing; 12/3/h1
TIGLOL	C8 H12 N2 O4 S2/Omega=3.45%(Set #7)	4,6-Dimethylbenzene-1,3-disulfonamide.	B.T.Gowda,K.S.Babitha,M.Tokarcik,J.Kozisek,H.Fuess	ACTA CRYSTALLOGR.,SECT.E:STRUCT.REP.ONLINE,2007,63,,o3361	Pbca	12T46
TIHVUC	C12 H9 Br2 N1 O2 S1/Omega=3.37%(Set #7)	4,4'-Dibromobenzenesulfonamidobenzene.	T.Gelbrich,M.B.Hursthouse,T.L.Threlfall	ACTA CRYSTALLOGR.,SECT.B:STRUCT.SCI.,2007,63,,621	R-3	12T78
TIHWEN	C12 H9 Br1 I1 N1 O2 S1/Omega=3.07%(Set #7)	4-Iodo-4'-bromobenzenesulfonamidobenzene.	T.Gelbrich,M.B.Hursthouse,T.L.Threlfall	ACTA CRYSTALLOGR.,SECT.B:STRUCT.SCI.,2007,63,,621	R-3	12T78
TIHWIR	C14 H10 Cl1 N1 O2 S1/Omega=3.77%(Set #7)	4-Ethynyl-4'-chlorobenzenesulfonamidobenzene.	T.Gelbrich,M.B.Hursthouse,T.L.Threlfall	ACTA CRYSTALLOGR.,SECT.B:STRUCT.SCI.,2007,63,,621	R-3	12T23
TIHXAK	C12 H9 Cl1 I1 N1 O2 S1/Omega=2.98%(Set #7)	4-Iodo-4'-chlorobenzenesulfonamidobenzene.	T.Gelbrich,M.B.Hursthouse,T.L.Threlfall	ACTA CRYSTALLOGR.,SECT.B:STRUCT.SCI.,2007,63,,621	R-3	12T23
TIHXEO	C13 H9 Br1 N2 O2 S1/Omega=3.99%(Set #7)	4-Bromo-4'-cyanobenzenesulfonamidobenzene.	T.Gelbrich,M.B.Hursthouse,T.L.Threlfall	ACTA CRYSTALLOGR.,SECT.B:STRUCT.SCI.,2007,63,,621	R-3	12T78
TIHXOY	C13 H9 Cl1 N2 O2 S1/Omega=4.03%(Set #7)	4-Chloro-4'-cyanobenzenesulfonamidobenzene.	T.Gelbrich,M.B.Hursthouse,T.L.Threlfall	ACTA CRYSTALLOGR.,SECT.B:STRUCT.SCI.,2007,63,,621	R-3	12T78
TIHXUE	C13 H9 I1 N2 O2 S1/Omega=3.92%(Set #7)	4-Iodo-4'-cyanobenzenesulfonamidobenzene.	T.Gelbrich,M.B.Hursthouse,T.L.Threlfall	ACTA CRYSTALLOGR.,SECT.B:STRUCT.SCI.,2007,63,,621	R-3	12T78
TIHYEP	C12 H9 Br1 F1 N1 O2 S1/Omega=3.48%(Set #7)	4-Bromo-4'-fluorobenzenesulfonamidobenzene.	T.Gelbrich,M.B.Hursthouse,T.L.Threlfall	ACTA CRYSTALLOGR.,SECT.B:STRUCT.SCI.,2007,63,,621	R-3	12T23
TIHYOZ	C12 H9 Cl1 F1 N1 O2 S1/Omega=3.71%(Set #7)	4-Chloro-4'-fluorobenzenesulfonamidobenzene.	T.Gelbrich,M.B.Hursthouse,T.L.Threlfall	ACTA CRYSTALLOGR.,SECT.B:STRUCT.SCI.,2007,63,,621	R-3	12T23
TIHYUF	C12 H9 F2 N1 O2 S1/Omega=3.85%(Set #7)	4,4'-Difluorobenzenesulfonamidobenzene.	T.Gelbrich,M.B.Hursthouse,T.L.Threlfall	ACTA CRYSTALLOGR.,SECT.B:STRUCT.SCI.,2007,63,,621	R-3	12T23
TIHZAM	C12 H9 F1 I1 N1 O2 S1/Omega=2.97%(Set #7)	4-Iodo-4'-fluorobenzenesulfonamidobenzene.	T.Gelbrich,M.B.Hursthouse,T.L.Threlfall	ACTA CRYSTALLOGR.,SECT.B:STRUCT.SCI.,2007,63,,621	R-3	12T23
TIHZOA	C13 H12 Cl1 N1 O2 S1/Omega=4.65%(Set #7)	4-Chloro-4'-methylbenzenesulfonamidobenzene.	T.Gelbrich,M.B.Hursthouse,T.L.Threlfall	ACTA CRYSTALLOGR.,SECT.B:STRUCT.SCI.,2007,63,,621	R-3	12T78
TIHZUG	C13 H12 I1 N1 O2 S1/Omega=3.28%(Set #7)	4-Iodo-4'-methylbenzenesulfonamidobenzene.	T.Gelbrich,M.B.Hursthouse,T.L.Threlfall	ACTA CRYSTALLOGR.,SECT.B:STRUCT.SCI.,2007,63,,621	R-3	12T78
TIJBAQ	C13 H12 I1 N1 O3 S1/Omega=3.37%(Set #7)	4-Iodo-4'-methoxybenzenesulfonamidobenzene.	T.Gelbrich,M.B.Hursthouse,T.L.Threlfall	ACTA CRYSTALLOGR.,SECT.B:STRUCT.SCI.,2007,63,,621	R-3	12T78
TIYXII	C10 H17 N1 O2 S1/Omega=4.37%(Set #6)	(+)-trans-Camphenesulfonamide.	F.A.Davis,R.Boyd,Ping Zhou,N.F.Abdul-Malik,P.J.Carroll	TETRAHEDRON LETT.,1996,37,,3267	P212121	hcp/hexagonal closest packing; 12/3/h1
TSCHOL	C34 H55 N1 O3 S1/Omega=3.43%(Set #6)	3\b-(Toluene-p-sulfonamido)-5\a-cholestan-2\b-ol.	G.M.L.Cragg,P.A.McCallum,L.R.Nassimbeni,A.L.Rodgers,J.C.van Niekerk	S.Afr.J.Chem.,1979,32,,97	P21	fcu/cubic closest packing; 12/3/c1; sqc19
TUNROK	C14 H12 Cl1 N1 O3 S1/Omega=3.77%(Set #8)	2-Chloro-N-(2-methylbenzoyl)benzenesulfonamide.	P.A.Suchetan,B.T.Gowda,S.Foro,H.Fuess	ACTA CRYSTALLOGR.,SECT.E:STRUCT.REP.ONLINE,2010,66,,o1281	P21/n	fcu/cubic closest packing; 12/3/c1; sqc19
TUNRUQ	C14 H14 Cl1 N1 O2 S1/Omega=2.30%(Set #8)	N-(2-Chlorophenyl)-2,4-dimethylbenzenesulfonamide.	B.T.Gowda,S.Foro,P.G.Nirmala,H.Fuess	ACTA CRYSTALLOGR.,SECT.E:STRUCT.REP.ONLINE,2010,66,,o1282	Pbcn	hcp/hexagonal closest packing; 12/3/h1
TUNTIG	C14 H12 Cl1 N1 O3 S1/Omega=3.75%(Set #7)	2-Chloro-N-(3-methylbenzoyl)benzenesulfonamide.	P.A.Suchetan,B.T.Gowda,S.Foro,H.Fuess	ACTA CRYSTALLOGR.,SECT.E:STRUCT.REP.ONLINE,2010,66,,o1292	Pbca	bcu-x/ 14-conn;I m -3 m->C m c m (a-b,a+b,c; 1/4,1/4,1/4);Bond sets: 2,3,4,5:bcu-x
TUQKUM	C14 H12 Cl1 N1 O3 S1/Omega=2.62%(Set #7)	4-Chloro-N-(4-methylbenzoyl)benzenesulfonamide.	P.A.Suchetan,B.T.Gowda,S.Foro,H.Fuess	ACTA CRYSTALLOGR.,SECT.E:STRUCT.REP.ONLINE,2010,66,,o1501	Pbca	12T50
TUQLAT	C15 H15 N1 O3 S1/Omega=3.48%(Set #9)	4-Methyl-N-(2-methylbenzoyl)benzenesulfonamide.	B.T.Gowda,S.Foro,P.A.Suchetan,H.Fuess	ACTA CRYSTALLOGR.,SECT.E:STRUCT.REP.ONLINE,2010,66,,o1502	P-1	bcu-x/ 14-conn;I m -3 m->P 21/c (1/2a+1/2b+1/2c,2a-2b,-c; 1/2,0,1/2);Bond sets: 1,2,4,5,7,8,9:bcu-x
TUYBIY	C12 H12 N2 O3 S1/Omega=3.93%(Set #8)	N-(2-Phenoxy-3-pyridinyl)methanesulfonamide.	F.Julemont,X.de Leval,C.Michaux,J.Damas,C.Charlier,F.Durant,B.Pirotte,J.-M.Dogne	J.Med.Chem.,2002,45,,5182	P21/n	fcu/cubic closest packing; 12/3/c1; sqc19
UBIXAG	C12 H17 N3 O4 S1/Omega=1.80%(Set #6)	N-(2-Aminocyclohexyl)-4-nitrobenzenesulfonamide.	A.Barron-Jaime,O.F.Narvaez-Garayzar,J.Gonzalez,V.Ibarra-Galvan,G.Aguirre,M.Parra-Hake,D.Chavez,R.Somanathan	CHIRALITY,2011,23,,178	P212121	fcu/cubic closest packing; 12/3/c1; sqc19
UCAZEE	C19 H12 F5 N1 O2 S1/Omega=4.82%(Set #9)	2-p-toluenesulfonamide-2',3',4',5',6'-pentafluorobiphenyl.	O.B.Berryman,F.Hof,M.J.Hynes,D.W.Johnson	CHEM.COMMUN.,2006,,,506	P-1	hcp/hexagonal closest packing; 12/3/h1
UCUFAA	C10 H16 N2 O2 S1/Omega=2.63%(Set #8)	N-(3-Aminopropyl)-4-methylbenzenesulfonamide.	C.Squires,C.W.Baxter,J.Campbell,L.F.Lindoy,H.McNab,A.Parkin,S.Parsons,P.A.Tasker,Gang Wei,D.J.White	DALTON TRANS.,2006,,,2026	P21/c	12T74
UCUFEE	C17 H22 N2 O2 S1/Omega=3.68%(Set #6)	N-(3-(Benzylamino)propyl)-4-methylbenzenesulfonamide.	C.Squires,C.W.Baxter,J.Campbell,L.F.Lindoy,H.McNab,A.Parkin,S.Parsons,P.A.Tasker,Gang Wei,D.J.White	DALTON TRANS.,2006,,,2026	Pna21	fcu/cubic closest packing; 12/3/c1; sqc19
UCUFII	C14 H24 N2 O2 S1/Omega=3.62%(Set #7)	N-(3-(Butylamino)propyl)-4-methylbenzenesulfonamide.	C.Squires,C.W.Baxter,J.Campbell,L.F.Lindoy,H.McNab,A.Parkin,S.Parsons,P.A.Tasker,Gang Wei,D.J.White	DALTON TRANS.,2006,,,2026	P21/c	12T79
UDIMAV	C19 H26 Br1 N1 O6 S1/Omega=2.80%(Set #6)	(1S,2S,3R,4R)-4-Acetoxymethyl-1-bromomethyl-2,3-isopropylidenedioxy-1-p-toluenesulfonamido-cyclopentane.	M.Ahmadian,N.K.Khare,J.M.Riordan,A.E.Klon,D.W.Borhani	TETRAHEDRON,2001,57,,9899	P21	hcp/hexagonal closest packing; 12/3/h1
UDOWAM	C24 H21 N1 O3 S1/Omega=2.75%(Set #7)	(E)-N-[1-phenyl-2-(phenylcarbonyl)penta-2,4-dien-1-yl]benzenesulfonamide.	J.M.Sorbetti,K.N.Clary,D.A.Rankic,J.E.Wulff,M.Parvez,T.G.Back	J.ORG.CHEM.,2007,72,,3326	P21/n	hcp/hexagonal closest packing; 12/3/h1
UDUNOX	C17 H16 N2 O3 S1/Omega=4.44%(Set #6)	N-(4-Methoxybenzyl)quinoline-8-sulfonamide.	C.R.Andrighetti-Frohner,R.J.Nunes,L.E.da Silva,C.M.O.Simoes,S.Foro	ACTA CRYSTALLOGR.,SECT.E:STRUCT.REP.ONLINE,2007,63,,o3059	P212121	fcu/cubic closest packing; 12/3/c1; sqc19
UDUTET	C23 H21 N1 O4 S1/Omega=2.81%(Set #9)	5-(2-Benzoylethenyl)-N-benzyl-2-methoxybenzenesulfonamide.	C.R.Andrighetti-Frohner,A.C.Joussef,C.M.O.Simoes,R.J.Nunes,A.J.Bortoluzzi	ACTA CRYSTALLOGR.,SECT.E:STRUCT.REP.ONLINE,2007,63,,o3275	P-1	bcu-x/ 14-conn;I m -3 m->C m c m (a-b,a+b,c; 1/4,1/4,1/4);Bond sets: 2,3,4,5:bcu-x
UFEQAY	C18 H26 N2 O5 S1/Omega=2.98%(Set #6)	N-(3-(2-Methoxyethyl)-6,6-dimethylbicyclo[3.1.1]hept-2-yl)-4-nitrobenzenesulfonamide.	T.Jennequin,S.Labat,L.Toupet,J.-C.Caille,M.Mauduit	SYNLETT,2008,,,1669	P21	bcu-x/ 14-conn;I m -3 m->C m c m (a+b,c,a-b; 1/4,3/4,1/4);Bond sets: 1,3,4,5:bcu-x
UGOVUH	C18 H20 Cl1 N1 O3 S1/Omega=3.12%(Set #10)	N-(4-Chloro-\a-(tetrahydrofuran-2-yl)benzyl)-4-toluenesulfonamide.	K.Yamada,H.Fujihara,Y.Yamamoto,Y.Miwa,T.Taga,K.Timioka	Org.Lett.,2002,4,,3509	P-1	fcu/cubic closest packing; 12/3/c1; sqc19
UKAQUS	C20 H19 N1 O3 S1/Omega=3.71%(Set #8)	N-(5,6-dihydro-4H-3-oxa-benzo(e)azulen-4-yl)-4-methyl-benzenesulfonamide.	A.Padwa,A.Zanka,M.P.Cassidy,J.M.Harris	TETRAHEDRON,2003,59,,4939	P21/c	bcu-x/ 14-conn;I m -3 m->I b c a (a+b,c,2a-2b; 3/4,1/4,1/4);Bond sets: 1,2,3,5,6:bcu-x
ULIDOJ	C14 H15 N3 O4 S1/Omega=1.67%(Set #6)	4-(3,4-Diacetyl-5-methyl-1H-pyrazol-1-yl)benzenesulfonamide.	H.A.Abdel-Aziz,A.Bari,S.W.Ng	ACTA CRYSTALLOGR.,SECT.E:STRUCT.REP.ONLINE,2011,67,,o693	Pna21	12T80
UNUYUY	C13 H9 Cl1 N2 O5 S1/Omega=4.08%(Set #6)	4-Chloro-N-(4-nitrobenzoyl)benzenesulfonamide.	P.A.Suchetan,S.Foro,B.T.Gowda	ACTA CRYSTALLOGR.,SECT.E:STRUCT.REP.ONLINE,2011,67,,o904	P21	12T81
UPABIX	C14 H12 N2 O5 S1/Omega=4.46%(Set #6)	4-Methyl-N-(4-nitrobenzoyl)benzenesulfonamide.	P.A.Suchetan,S.Foro,B.T.Gowda	ACTA CRYSTALLOGR.,SECT.E:STRUCT.REP.ONLINE,2011,67,,o917	P21	12T11
UPADEV	C14 H12 N2 O5 S1/Omega=3.62%(Set #6)	2-Methyl-N-(4-nitrobenzoyl)benzenesulfonamide.	P.A.Suchetan,S.Foro,B.T.Gowda	ACTA CRYSTALLOGR.,SECT.E:STRUCT.REP.ONLINE,2011,67,,o929	P21	12T81
UPADIZ	C13 H9 Cl1 N2 O5 S1/Omega=3.41%(Set #6)	2-Chloro-N-(4-nitrobenzoyl)benzenesulfonamide.	P.A.Suchetan,S.Foro,B.T.Gowda	ACTA CRYSTALLOGR.,SECT.E:STRUCT.REP.ONLINE,2011,67,,o930	P21	12T81
UPAPAD	C12 H9 Cl2 N1 O2 S1/Omega=3.03%(Set #8)	4-Chloro-N-(2-chlorophenyl)benzenesulfonamide.	K.Shakuntala,S.Foro,B.T.Gowda	ACTA CRYSTALLOGR.,SECT.E:STRUCT.REP.ONLINE,2011,67,,o988	C2/c	12T82
URAVEP	C20 H26 N2 O4 S2/Omega=3.47%(Set #6)	N,N'-((1S,2S)-Cyclohexane-1,2-diyl)bis(4-methylbenzenesulfonamide).	Yi-Ling Hong,Hua-Jie Tan,Liang Shen	ACTA CRYSTALLOGR.,SECT.E:STRUCT.REP.ONLINE,2011,67,,o1121	P212121	hcp/hexagonal closest packing; 12/3/h1
USOBAG	C13 H14 N2 O2 S1/Omega=3.67%(Set #6)	4-(Benzylamino)benzenesulfonamide.	T.Gelbrich,M.F.Haddow,U.J.Griesser	ACTA CRYSTALLOGR.,SECT.E:STRUCT.REP.ONLINE,2011,67,,o1551	P212121	12T9
UTEWIA	C18 H21 N3 O2 S1/Omega=3.71%(Set #6)	N-(1-(Imidazo[1,2-a]pyridin-3-yl)butyl)-4-methylbenzenesulfonamide.	L.Albrecht,A.Albrecht,L.K.Ransborg,K.A.Jorgensen	Chemical Science,2011,2,,1273	P21	fcu/cubic closest packing; 12/3/c1; sqc19
UVEMUE	C12 H11 N3 O4 S1/Omega=6.28%(Set #7)	4-Amino-N-(4-nitrophenyl)benzenesulfonamide.	G.L.Perlovich,A.M.Ryzhakov,V.V.Tkachev,L.Kr.Hansen	CRYST.GROWTH DES.,2011,11,,1067	Pbca	12T34
UWUZUI	C23 H25 N1 O3 S1/Omega=5.88%(Set #9)	N-(2-(1H-Isochromen-4(3H)-ylidenemethylene)cyclohexyl)-4-methylbenzenesulfonamide.	N.Kern,A.Blanc,J.-M.Weibel,P.Pale	CHEM.COMMUN.,2011,47,,6665	P-1	hcp/hexagonal closest packing; 12/3/h1
UXEVEZ	C23 H22 N2 O2 S1/Omega=2.91%(Set #6)	N-(1H-Indol-3-yl(4-methylphenyl)methyl)-4-methylbenzenesulfonamide.	Fangxi Xu,Dan Huang,Chao Han,Wei Shen,Xufeng Lin,Yanguang Wang	J.ORG.CHEM.,2010,75,,8677	P21	hcp/hexagonal closest packing; 12/3/h1
VABHUD	C13 H12 Cl1 N1 O3 S1/Omega=3.32%(Set #9)	N-(5-Chloro-2-methoxyphenyl)benzenesulfonamide.	Aziz-ur-Rehman,Shahzaman,M.Akkurt,M.A.Abbasi,I.U.Khan	ACTA CRYSTALLOGR.,SECT.E:STRUCT.REP.ONLINE,2010,66,,o2855	P-1	bcu-x/ 14-conn;I m -3 m->C m c m (a-b,a+b,c; 1/4,1/4,1/4);Bond sets: 2,3,4,5:bcu-x
VABPEV	C11 H13 Cl2 N1 O4 S1/Omega=3.76%(Set #6)	2-(2,5-Dichlorobenzenesulfonamido)-3-methylbutanoic acid.	I.U.Khan,P.John,H.Iqbal,S.Sharif,E.R.T.Tiekink	ACTA CRYSTALLOGR.,SECT.E:STRUCT.REP.ONLINE,2010,66,,o2888	P212121	12T5
VACFOW	C14 H15 N1 O3 S1/Omega=4.02%(Set #7)	N-(2-Methoxyphenyl)-4-methylbenzenesulfonamide.	I.U.Khan,T.A.Sheikh,M.N.Arshad	ACTA CRYSTALLOGR.,SECT.E:STRUCT.REP.ONLINE,2010,66,,o2976	Pbca	hcp/hexagonal closest packing; 12/3/h1
VACHOX	C18 H18 Cl1 N1 O3 S1/Omega=2.77%(Set #6)	(R)-N-(1-(4-Chlorophenyl)-2-methylene-3-oxobutyl)-4-methylbenzenesulfonamide.	Min Shi,Yong-Mei Xu	Angew.Chem.,Int.Ed.,2002,41,,4507	P21	hcp/hexagonal closest packing; 12/3/h1
VANRUZ	C9 H15 N1 O2 S1/Omega=2.69%(Set #9)	N-(1-methyltricyclo[2.2.1.0 2,6]hept-3-yl)methanesulfonamide.	X.Giner,C.Najera,G.Kovacs,A.Lledos,G.Ujaque	ADV.SYNTH.CATAL.,2011,353,,3451	C2/c	12T71
VATSIU	C9 H22 N2 O4 S2/Omega=4.47%(Set #8)	N,N'-Pentane-1,5-diyldiethanesulfonamide.	N.Ozbek,S.Alyar,S.Mamas,E.Sahin,N.Karacan	J.MOL.STRUCT.,2012,1010,,1	P21/a	fcu/cubic closest packing; 12/3/c1; sqc19
VAWMOV	C7 H12 N4 O6 S1/Omega=2.43%(Set #6)	1\b-D-Ribofuranosyl-1,2,4-triazole-3-sulfonamide.	N.B.Hanna,S.D.Dimitrijevich,S.B.Larson,R.K.Robins,G.R.Revankar	J.HETEROCYCL.CHEM.,1988,25,,1857	P21	fcu/cubic closest packing; 12/3/c1; sqc19
VETVAR	C10 H17 N3 O3 S1/Omega=4.00%(Set #7)	N-(Dimethylaminoethyl)-(4-methoxy-3-pyridyl)sulfonamide.	L.Dupont,O.Dideberg,J.F.Liegeois,J.Delarge	ACTA CRYSTALLOGR.,SECT.C:CRYST.STRUCT.COMMUN.,1990,46,,1863	P21/n	bcu-x/ 14-conn;I m -3 m->P 21/c (1/2a+1/2b+1/2c,2a-2b,-c; 1/2,0,1/2);Bond sets: 1,2,4,5,7,8,9:bcu-x
VETVEV	C12 H19 N3 O2 S1/Omega=3.33%(Set #7)	N-((2-Ethylpyrrolidinyl)methyl)-3-pyridylsulfonamide.	L.Dupont,O.Dideberg,J.F.Liegeois,J.Delarge	ACTA CRYSTALLOGR.,SECT.C:CRYST.STRUCT.COMMUN.,1990,46,,1863	P21/n	12T83
VEXVUQ	C13 H18 Cl1 N1 O2 S1/Omega=0.98%(Set #9)	cis-N-(2-chlorocyclohexyl)-4-methylbenzenesulfonamide.	E.A.Jaseer,A.B.Naidu,S.S.Kumar,R.K.Rao,K.G.Thakur,G.Sekar	CHEM.COMMUN.,2007,,,867	P-1	fcu/cubic closest packing; 12/3/c1; sqc19
VIDJEY	C16 H24 N2 O3 S1/Omega=3.65%(Set #6)	N-(2-Aminophenyl)-1-((1S,2R)-2-hydroxy-7,7-dimethylbicyclo(2.2.1)hept-1-yl)methanesulfonamide.	J.K.Maurin,A.Krukowski,Z.Czarnocki	ACTA CRYSTALLOGR.,SECT.E:STRUCT.REP.ONLINE,2007,63,,o1593	P212121	fcu/cubic closest packing; 12/3/c1; sqc19
VIDKID	C7 H8 N2 O4 S1/Omega=4.19%(Set #10)	N-(3-Nitrophenyl)methanesulfonamide.	B.T.Gowda,S.Foro,H.Fuess	ACTA CRYSTALLOGR.,SECT.E:STRUCT.REP.ONLINE,2007,63,,o2337	P-1	fcu/cubic closest packing; 12/3/c1; sqc19
VIDKOJ	C8 H11 N1 O2 S1/Omega=5.00%(Set #8)	N-(3-Methylphenyl)methanesulfonamide.	B.T.Gowda,S.Foro,H.Fuess	ACTA CRYSTALLOGR.,SECT.E:STRUCT.REP.ONLINE,2007,63,,o2338	Pccn	12T84
VIDKUP	C7 H8 N2 O4 S1/Omega=5.34%(Set #8)	N-(4-Nitrophenyl)methanesulfonamide.	B.T.Gowda,S.Foro,H.Fuess	ACTA CRYSTALLOGR.,SECT.E:STRUCT.REP.ONLINE,2007,63,,o2339	P21/c	hcp/hexagonal closest packing; 12/3/h1
VIRSUL	C34 H26 N4 O4 S2/Omega=4.51%(Set #11)	11,12-bis(p-Toluenesulfonamido)dibenzo[a,c]phenazine.	Tzu-Pin Lin,Chan-Yu Chen,Yuh-Sheng Wen,Shih-Sheng Sun	INORG.CHEM.,2007,46,,9201	P-1	fcu/cubic closest packing; 12/3/c1; sqc19
VOHXOG	C8 H9 N1 O4 S1/Omega=4.87%(Set #8)	2-(Benzenesulfonamido)acetic acid.	M.N.Arshad,I.U.Khan,M.Zia-ur-Rehman	ACTA CRYSTALLOGR.,SECT.E:STRUCT.REP.ONLINE,2008,64,,o2283	P21/n	fcu/cubic closest packing; 12/3/c1; sqc19
VUKZEH	C27 H24 N2 O7 S1/Omega=3.07%(Set #10)	Dipropargyl1-((5-(dimethylamino)naphthalene-1-sulfonamido)methyl)-7-oxanorborna-2,5-diene-2,3-dicarboxylate.	Vu Hong,A.A.Kislukhin,M.G.Finn	J.AM.CHEM.SOC.,2009,131,,9986	P-1	fcu/cubic closest packing; 12/3/c1; sqc19
VURZOY	C20 H24 Br1 N1 O6 S1/Omega=2.29%(Set #8)	rac-N-(2-Bromo-3-oxo-1-(3,4,5-trimethoxyphenyl)butyl)-4-methylbenzenesulfonamide.	Zhan-Guo Chen,Jun-Fa Wei,Ming-Zhen Wang,Li-Yan Zhou,Cong-Jie Zhang,Xian-Ying Shi	ADV.SYNTH.CATAL.,2009,351,,2358	P21/n	12T85
WACHEP	C12 H9 Cl2 N1 O2 S1/Omega=2.52%(Set #7)	N-(2,6-Dichlorophenyl)benzenesulfonamide.	P.G.Nirmala,S.Foro,B.T.Gowda,H.Fuess	ACTA CRYSTALLOGR.,SECT.E:STRUCT.REP.ONLINE,2010,66,,o3061	P21/n	bcu-x/ 14-conn;I m -3 m->P 21/c (1/2a+1/2b+1/2c,-a+b,-a-b+c; 1/2,0,0);Bond sets: 1,2,3,5,7,8,9:bcu-x
WACHEP01	C12 H9 Cl2 N1 O2 S1/Omega=2.54%(Set #7)	N-(2,6-Dichlorophenyl)benzenesulfonamide.	P.Sanphui,B.Sarma,A.Nangia	CRYST.GROWTH DES.,2010,10,,4550	P21/n	bcu-x/ 14-conn;I m -3 m->P 21/c (1/2a+1/2b+1/2c,-a+b,-a-b+c; 1/2,0,0);Bond sets: 1,2,3,5,7,8,9:bcu-x
WACHEP02	C12 H9 Cl2 N1 O2 S1/Omega=3.43%(Set #8)	N-(2,6-Dichlorophenyl)benzenesulfonamide.	P.Sanphui,B.Sarma,A.Nangia	CRYST.GROWTH DES.,2010,10,,4550	P21/c	12T27
WACJIT	C2 H4 N4 O2 S2/Omega=3.37%(Set #7)	5-Amino-1,3,4-thiadiazole-2-sulfonamide.	J.C.Pedregosa,G.Alzuet,J.Borras,S.Fustero,S.Garcia-Granda,M.R.Diaz	ACTA CRYSTALLOGR.,SECT.C:CRYST.STRUCT.COMMUN.,1993,49,,630	P21/n	bcu-x/ 14-conn;I m -3 m->P 21/c (1/2a+1/2b+1/2c,-a+b,-a-b+c; 1/2,0,0);Bond sets: 1,2,3,5,7,8,9:bcu-x
WACXUV	C14 H13 Cl2 N1 O2 S1/Omega=2.46%(Set #9)	N-(2,4-Dichlorophenyl)-2,4-dimethylbenzenesulfonamide.	P.G.Nirmala,S.Foro,B.T.Gowda,H.Fuess	ACTA CRYSTALLOGR.,SECT.E:STRUCT.REP.ONLINE,2010,66,,o3144	P-1	fcu/cubic closest packing; 12/3/c1; sqc19
WACZAC	C22 H24 N2 O2 S1/Omega=4.29%(Set #7)	4-Methyl-N-(2-phenyl-1-(2-pyridinyl)butyl)benzenesulfonamide.	L.Bernardi,V.Cere,C.Femoni,S.Pollicino,A.Ricci	J.ORG.CHEM.,2003,68,,3348	P21/c	12T25
WAFKOF	C21 H22 N2 O2 S1/Omega=3.00%(Set #6)	N-[(1S,2S)-2-Amino-1,2-diphenylethyl]-4-methylbenzenesulfonamide.	C.Schlemmer,D.Schollmeyer,N.Blank,A.Stoye,T.Opatz	ACTA CRYSTALLOGR.,SECT.E:STRUCT.REP.ONLINE,2010,66,,o3343	P212121	fcu/cubic closest packing; 12/3/c1; sqc19
WALWOW	C21 H25 N3 O4 S1/Omega=2.58%(Set #8)	(+-)-2-((1SR)-1-Hydroxy-2-phenylethyl)-5-((SR)-methoxy(phenyl)methyl)-N,N-dimethyl-1H-imidazole-1-sulfonamide.	S.Sahli,B.Stump,T.Welti,W.B.Schweizer,F.Diederich,D.Blum-Kaelin,J.D.Aebi,H.-J.Bohm	HELV.CHIM.ACTA,2005,88,,707	P21/c	12T8
WAWMUD	C12 H13 N3 O2 S1/Omega=4.43%(Set #8)	4-(2-Methylanilino)pyridine-3-sulfonamide.	N.K.Hulita,A.Danilovski,D.Filic,M.Marinkovic,E.Mestrovic,M.Dumic	ACTA CRYSTALLOGR.,SECT.C:CRYST.STRUCT.COMMUN.,2005,61,,o648	P21/n	fcu/cubic closest packing; 12/3/c1; sqc19
WAWNAK	C12 H13 N3 O2 S1/Omega=3.09%(Set #8)	4-(4-Methylanilino)pyridine-3-sulfonamide.	N.K.Hulita,A.Danilovski,D.Filic,M.Marinkovic,E.Mestrovic,M.Dumic	ACTA CRYSTALLOGR.,SECT.C:CRYST.STRUCT.COMMUN.,2005,61,,o648	P21/c	12T44
WEBBIO	C28 H24 N2 O4 S2/Omega=4.54%(Set #6)	N,N'-(1,2-Ethynylenedi-2,2'-phenylene)-bis(4-methylbenzenesulfonamide).	D.S.Davis,J.L.Stubbs,F.R.Fronczek,R.D.Gandour	ACTA CRYSTALLOGR.,SECT.C:CRYST.STRUCT.COMMUN.,1993,49,,2148	P-1	fcu/cubic closest packing; 12/3/c1; sqc19
WEBWUV	C6 H6 F1 N1 O2 S1/Omega=5.88%(Set #7)	p-Fluorobenzenesulfonamide.	P.G.Jones,A.Weinkauf	Z.KRISTALLOGR.,1993,208,,128	Pbca	12T37
WENROX	C13 H14 N4 O3 S1/Omega=1.89%(Set #9)	4-Acetamido-N-(4-methyl-2-pyrimidinyl)benzenesulfonamide.	Yuchuan Gong,Enxian Lu,Yuegang Zhang,V.G.Young Junior,D.J.W.Grant	ACTA CRYSTALLOGR.,SECT.E:STRUCT.REP.ONLINE,2006,62,,o4245	C2/c	12T87
WIHGEA	C9 H13 N1 O2 S1/Omega=4.13%(Set #6)	N-(3,4-Dimethylphenyl)methanesulfonamide.	B.T.Gowda,S.Foro,H.Fuess	ACTA CRYSTALLOGR.,SECT.E:STRUCT.REP.ONLINE,2007,63,,o3085	P21	fcu/cubic closest packing; 12/3/c1; sqc19
WIKNAF	C14 H11 Cl1 N4 O2 S1/Omega=3.22%(Set #9)	N-(5-Chloro-2-quinoxalinyl)benzenesulfonamide.	Mei Liu,J.R.Ruble,S.K.Arora	ACTA CRYSTALLOGR.,SECT.C:CRYST.STRUCT.COMMUN.,1994,50,,2032	P-1	bcu-x/ 14-conn;I m -3 m->P -1 (-1/2a+1/2b+1/2c,1/2a-1/2b+1/2c,a+b; 3/4,3/4,1/4);Bond sets: 2,3,4,5,6,7,8,9,11:bcu-x
WOJRIW	C14 H14 N2 O4 S1/Omega=4.53%(Set #6)	(S)-N-(\a-Methylbenzyl)-4-nitrobenzenesulfonamide.	M.S.Hendi,R.E.Davis,K.A.Wheeler	CRYSTAL ENGINEERING,2000,3,,209	P21	hcp/hexagonal closest packing; 12/3/h1
WOJROC	C14 H14 Cl1 N1 O2 S1/Omega=4.56%(Set #6)	(R)-N-(\a-Methylbenzyl)-4-chlorobenzenesulfonamide.	M.S.Hendi,R.E.Davis,K.A.Wheeler	CRYSTAL ENGINEERING,2000,3,,209	P21	ild; sqc15
WOJSAP	C15 H17 N1 O3 S1/Omega=3.77%(Set #6)	(R)-N-(\a-Methylbenzyl)-4-methoxybenzenesulfonamide.	M.S.Hendi,R.E.Davis,K.A.Wheeler	CRYSTAL ENGINEERING,2000,3,,209	P21	12T11
WUGBIK	C34 H27 F1 N1 O3 P1 S1/Omega=3.09%(Set #9)	N-((Di-1-naphthylphosphoryl)(4-fluorophenyl)methyl)-4-methylbenzenesulfonamide.	Xiao Fu,Wei-Tian Loh,Yan Zhang,Tao Chen,Ting Ma,Hongjun Liu,Jianmin Wang,Choon-Hong Tan	Angew.Chem.,Int.Ed.,2009,48,,7387	P-1	gsp1
WUPHOF	C19 H20 Br1 Cl1 N2 O3 S1/Omega=1.58%(Set #6)	N-(4-Bromobenzyl)-4-chloro-N-(2-oxoazepan-3-yl)benzenesulfonamide.	M.N.Mattson,M.L.Neitzel,D.A.Quincy,C.M.Semko,A.W.Garofalo,P.S.Keim,A.W.Konradi,M.A.Pleiss,H.L.Sham,E.F.Brigham,E.G.Goldbach,Hongbin Zhang,J.-M.Sauer,G.S.Basi	BIOORG.MED.CHEM.LETT.,2010,20,,2148	P21	hcp/hexagonal closest packing; 12/3/h1
WURBER	C20 H18 N2 O2 S1/Omega=2.53%(Set #6)	5-(Dimethylamino)-N-(4-ethynylphenyl)naphthalene-1-sulfonamide.	C.-H.Chui,Q.Wang,W.-C.Chow,M.C.-W.Yuen,K.-L.Wong,W.-M.Kwok,G.Y.-M.Cheng,R.S.-M.Wong,S.-W.Tong,K.-W.Chan,F.-Y.Lau,P.B.-S.Lai,K.-H.Lam,E.Fabbri,X.-M.Tao,R.Gambari,W.-Y.Wong	CHEM.COMMUN.,2010,46,,3538	Cc	12T15
WUTBAP	C13 H19 N1 O6 S1/Omega=0.87%(Set #10)	4-Methyl-N-(2,3,5,6-tetrahydroxycyclohexyl)benzenesulfonamide.	N.I.Kurbanoglu,M.Celik,H.Kilic,C.Alp,E.Sahin,M.Balci	TETRAHEDRON,2010,66,,3485	P-1	fcu/cubic closest packing; 12/3/c1; sqc19
WUYQAJ	C10 H9 N3 O2 S1/Omega=1.62%(Set #9)	N-(Pyridin-2-yl)pyridine-3-sulfonamide.	K.Katagiri,T.Ikeda,M.Tominaga,H.Masu,I.Azumaya	CRYST.GROWTH DES.,2010,10,,2291	P-1	bcu-x/ 14-conn;I m -3 m->P -1 (-1/2a+1/2b+1/2c,1/2a-1/2b+1/2c,a+b; 3/4,3/4,1/4);Bond sets: 2,3,4,5,6,7,8,9,11:bcu-x
XAJRUW	C15 H16 N2 O3 S1/Omega=2.94%(Set #8)	N-(2-((1E)-N-Hydroxyethanimidoyl)phenyl)-4-methylbenzenesulfonamide.	S.Parsons,D.White,P.Tasker,S.Harris,P.A.Wood	PRIVATE COMMUNICATION,2004,,,	P21/n	bcu-x/ 14-conn;I m -3 m->C m c m (a-b,a+b,c; 1/4,1/4,1/4);Bond sets: 2,3,4,5:bcu-x
XAPDEZ	C10 H10 N2 O6 S1/Omega=4.30%(Set #6)	2-Nitro-N-(2-oxotetrahydrofuran-3-yl)benzenesulfonamide.	S.P.Singh,A.Michaelides,A.R.Merrill,A.L.Schwan	J.ORG.CHEM.,2011,76,,6825	P212121	fcu/cubic closest packing; 12/3/c1; sqc19
XARQIS	C10 H13 N5 O2 S1/Omega=4.04%(Set #8)	4-Methyl-N-(2-(1H-tetrazol-1-yl)ethyl)benzenesulfonamide.	K.Mereiter,M.Tafili-Kryeziu,F.Werner	PRIVATE COMMUNICATION,2011,,,	P21/c	12T45
XATFAA	C15 H18 N6 O4 S2/Omega=2.43%(Set #7)	N-(6-(imidazo(1,2-d)(1,2,4)thiadiazol-3-yl(methyl)amino)hexyl)-2-nitrobenzenesulfonamide.	R.Leung-Toung,T.F.Tam,Yanqing Zhao,C.D.Simpson,Wanren Li,D.Desilets,K.Karimian	J.ORG.CHEM.,2005,70,,6230	Pbca	12T37
XAXTOH	C21 H25 N1 O3 S1/Omega=2.66%(Set #8)	4-Methyl-N-((2,2,5-trimethyl-4-phenyl-2,3-dihydrofuran-3-yl)methyl)benzenesulfonamide.	Di-Han Zhang,Yin Wei,Min Shi	Chem.-Eur.J.,2012,18,,7026	P21/c	fcu/cubic closest packing; 12/3/c1; sqc19
XAYLIT	C32 H25 N3 O4 S1/Omega=2.68%(Set #8)	N-(4-(9,10-Dioxoanthracen-1-ylamino)phenyl)-5-(dimethylamino)naphthalenesulfonamide.	R.A.Illos,I.Ergaz,S.Bittner	Z.KRISTALLOGR.-NEW CRYST.STRUCT.,2005,220,,285	P21/c	fcu/cubic closest packing; 12/3/c1; sqc19
XAYPIY	C17 H15 N3 O6 S1/Omega=0.68%(Set #7)	3-(1H-Indol-3-yl)-2-(2-nitrobenzenesulfonamido)propanoic acid unknown solvate.	I.U.Khan,H.Mubashar-ur-Rehman,S.Aziz,W.T.A.Harrison	ACTA CRYSTALLOGR.,SECT.E:STRUCT.REP.ONLINE,2012,68,,o2019	P41212	12T88
XAYWUR	C20 H28 N2 O6 S2/Omega=3.43%(Set #5)	N,N'-([Ethane-1,2-diylbis(oxy)]bis(ethane-2,1-diyl))bis(4-methylbenzenesulfonamide).	N.N.Al-Mohammed,Y.Alias,Z.Abdullah,H.Khaledi	ACTA CRYSTALLOGR.,SECT.E:STRUCT.REP.ONLINE,2012,68,,o1983	C2/c	12T88
XAZGOW	C14 H20 N2 O2 S1/Omega=2.06%(Set #6)	N-(3-Aminobicyclo[2.2.1]heptan-2-yl)-4-methylbenzenesulfonamide.	A.A.-M.Abdel-Aziz,A.S.El-Azab,M.A.El-Sherbeny,S.W.Ng,E.R.T.Tiekink	ACTA CRYSTALLOGR.,SECT.E:STRUCT.REP.ONLINE,2012,68,,o2032	P21	fcu/cubic closest packing; 12/3/c1; sqc19
XEGMIF	C20 H19 N1 O2 S2/Omega=2.86%(Set #9)	4-Methyl-N-(2-(p-tolylsulfanyl)phenyl)benzenesulfonamide.	S.Banerjee,A.K.Mukherjee,B.Nandi,N.G.Kundu,M.Helliwell	ACTA CRYSTALLOGR.,SECT.C:CRYST.STRUCT.COMMUN.,2000,56,,1490	P-1	bcu-x/ 14-conn;I m -3 m->C m c m (a-b,a+b,c; 1/4,1/4,1/4);Bond sets: 2,3,4,5:bcu-x
XEWKUF	C17 H15 F1 N2 O4 S2/Omega=1.98%(Set #9)	N-(2,3-Dihydro-4-(2,5-dimethoxyphenyl)thiazol-2-ylidene)-4-fluorobenzensulfonamide.	P.Beuchet,M.Varache-Lembege,A.Neveu,J.-M.Leger,J.Vercauteren,S.Larrouture,G.Deffieux,A.Nuhrich	EUR.J.MED.CHEM.,1999,34,,773	P-1	fcu/cubic closest packing; 12/3/c1; sqc19
XEWYAA	C31 H33 N3 O13 S1/Omega=4.25%(Set #6)	N-(2-((4-(3,4,5,6-tetrakis(acetoxy)-3,4,5,6-tetrahydro-2H-pyran-2-yloxy)phenyl)amino)pyridin-3-yl)-4-methoxybenzenesulfonamide.	K.M.Engstrom,R.F.Henry,I.Marsden	TETRAHEDRON LETT.,2007,48,,1359	P21	12T11
XIFKED	C11 H11 N3 O2 S1/Omega=2.20%(Set #9)	4-methyl-N-(pyrimidin-2-yl)benzenesulfonamide.	T.A.Mayer,M.B.Hursthouse,T.L.Threlfall,S.J.Coles	University of Southampton, Crystal Structure Report Archive,2000,,,	P-1	fcu/cubic closest packing; 12/3/c1; sqc19
XIFLOO	C10 H9 N3 O2 S1/Omega=3.86%(Set #9)	N-(pyrazin-2-yl)benzenesulfonamide.	M.B.Hursthouse,T.L.Threlfall,S.J.Coles,S.C.Ward	University of Southampton, Crystal Structure Report Archive,1999,,,	P-1	fcu/cubic closest packing; 12/3/c1; sqc19
XIFMEF	C13 H12 Cl1 N3 O3 S1/Omega=2.25%(Set #10)	2-(p-acetoamidobenzenesulfonamido)-5-chloropyridine.	M.B.Hursthouse,T.L.Threlfall,S.J.Coles,S.C.Ward	University of Southampton, Crystal Structure Report Archive,1999,,,	P-1	12T89
XIFMIJ	C12 H12 N2 O2 S1/Omega=3.13%(Set #8)	N-(5-Methyl-pyridin-2(1H)-ylidene)benzenesulfonamide.	M.B.Hursthouse,T.L.Threlfall,S.J.Coles,S.C.Ward	University of Southampton, Crystal Structure Report Archive,1999,,,	P21/c	12T90
XIFMUV	C12 H12 N2 O2 S1/Omega=4.25%(Set #8)	N-(3-Methyl-1H-pyridin-2-ylidene)benzenesulfonamide.	T.A.Mayer,M.B.Hursthouse,T.L.Threlfall,S.J.Coles	University of Southampton, Crystal Structure Report Archive,2000,,,	C2/c	bcu-x/ 14-conn;I m -3 m->C m c m (a-b,a+b,c; 1/4,1/4,1/4);Bond sets: 2,3,4,5:bcu-x
XIQFAE	C16 H19 N1 O3 S1/Omega=3.02%(Set #8)	N-(1-(furan-2-yl)-2-methylbut-3-enyl)-4-methylbenzenesulfonamide.	Wenshuo Lu,Tak Hang Chan	J.ORG.CHEM.,2001,66,,3467	P21/c	bcu-x/ 14-conn;I m -3 m->C m c m (a-b,a+b,c; 1/4,1/4,1/4);Bond sets: 2,3,4,5:bcu-x
XOBVUG	C18 H18 N2 O4 S1/Omega=3.52%(Set #6)	(S)-Methyl 2-(benzenesulfonamido)-3-(1H-indol-3-yl)propanoate.	Wen-Ming Li,Jian-Guo Wang,Wan-Cheng Guo,Zheng-Ming Li,Hai-Bin Song	Jiegou Huaxue(Chin.J.Struct.Chem.),2008,27,,691	P212121	fcu/cubic closest packing; 12/3/c1; sqc19
XOBWAN	C18 H17 Cl1 N2 O4 S1/Omega=3.36%(Set #6)	(S)-Methyl 2-(4-chlorobenzenesulfonamido)-3-(1H-indol-3-yl)propanoate.	Wen-Ming Li,Jian-Guo Wang,Wan-Cheng Guo,Zheng-Ming Li,Hai-Bin Song	Jiegou Huaxue(Chin.J.Struct.Chem.),2008,27,,691	P212121	fcu/cubic closest packing; 12/3/c1; sqc19
XOBYUJ	C27 H32 N2 O4 S1/Omega=3.15%(Set #6)	4-methyl-N-((3-methylphenyl)(8,9,9-trimethyl-2-oxo-3,5,6,7,8,8a-hexahydro-2H-5,8-methano-1,4-benzoxazin-3-yl)methyl)benzenesulfonamide.	Huan-Huan Zhang,Xiu-Qin Hu,Xiao Wang,Yong-Chun Luo,Peng-Fei Xu	J.ORG.CHEM.,2008,73,,3634	P21	fcu/cubic closest packing; 12/3/c1; sqc19
XOPVAZ	C19 H23 N1 O2 S2/Omega=2.76%(Set #10)	N-(2-phenylthiocyclohexyl)-4-methylbenzenesulfonamide.	Xue-Long Hou,Ren-Hua Fan,Li-Xin Dai	J.ORG.CHEM.,2002,67,,5295	P-1	fcu/cubic closest packing; 12/3/c1; sqc19
XOXSIM	C24 H29 N1 O2 S2 Si1/Omega=4.54%(Set #9)	N-(2-(Phenylthio)-1-phenyl-2-(trimethylsilyl)ethyl)-p-toluenesulfonamide.	V.K.Aggarwal,E.Alonso,M.Ferrara,S.E.Spey	J.ORG.CHEM.,2002,67,,2335	P-1	hcp/hexagonal closest packing; 12/3/h1
XOXYAK	C22 H20 N2 O4 S1/Omega=2.91%(Set #8)	2,2-Dimethyl-6-(phenylsulfonamido-S)-4-(2-pyridone)-chromene.	E.Salamon,R.Mannhold,H.Weber,H.Lemoine,W.Frank	J.Med.Chem.,2002,45,,1086	P21/n	12T53
XUBSOD	C9 H11 N1 O4 S1/Omega=3.96%(Set #6)	Methyl 2-(benzenesulfonamido)acetate.	M.N.Arshad,I.U.Khan,M.Zia-ur-Rehman,M.Shafiq	ACTA CRYSTALLOGR.,SECT.E:STRUCT.REP.ONLINE,2009,65,,o1204	P21	fcu/cubic closest packing; 12/3/c1; sqc19
XUDTEV	C6 H6 N2 O4 S1/Omega=4.76%(Set #6)	3-Nitrobenzenesulfonamide.	M.Tremayne,C.C.Seaton,C.Glidewell	ACTA CRYSTALLOGR.,SECT.B:STRUCT.SCI.,2002,58,,823	P21	fcu/cubic closest packing; 12/3/c1; sqc19
XUGNUJ	C19 H23 Br1 N2 O2 S1/Omega=2.65%(Set #6)	4-Bromo-N-((1S,2R)-1-phenyl-2-(pyrrolidin-1-yl)propyl)benzenesulfonamide.	Jian-Hua Xie,Sheng Liu,Wei-Ling Kong,Wen-Ju Bai,Xiao-Chen Wang,Li-Xin Wang,Qi-Lin Zhou	J.AM.CHEM.SOC.,2009,131,,4222	P21	hcp/hexagonal closest packing; 12/3/h1
XUQNON	C23 H21 N1 O2 S1/Omega=3.07%(Set #8)	4-Methyl-N-(2-(2-methyl-1H-inden-3-yl)phenyl)benzenesulfonamide.	P.Kothandaraman,Shi Jia Foo,P.W.H.Chan	J.ORG.CHEM.,2009,74,,5947	P21/n	fcu/cubic closest packing; 12/3/c1; sqc19
XUXJOQ	C28 H34 N4 O5 S1/Omega=2.88%(Set #6)	(2S,3R)-4-(4-(4-Nitrobenzyl)piperazin-1-yl)-3-hydroxy-1-phenyl-2-(4-toluenesulfonamido)butane.	W.Cunico,C.R.B.Gomes,W.T.A.Harrison,M.Moreth,J.L.Wardell,S.M.S.V.Wardell	Z.KRISTALLOGR.,2009,224,,461	P212121	12T11
YAFTEG	C14 H13 Cl2 N1 O2 S1/Omega=2.25%(Set #8)	2,4-Dichloro-N-(2,4-dimethylphenyl)benzenesulfonamide.	V.Z.Rodrigues,S.Foro,B.T.Gowda	ACTA CRYSTALLOGR.,SECT.E:STRUCT.REP.ONLINE,2011,67,,o2824	P21/n	fcu/cubic closest packing; 12/3/c1; sqc19
YAFVEI	C16 H13 N1 O2 S1/Omega=3.97%(Set #6)	N-(1-Naphthyl)benzenesulfonamide.	Sifang Zhang,Yuewen Zhang,Chuntao Wang,Ruitao Zhu	ACTA CRYSTALLOGR.,SECT.E:STRUCT.REP.ONLINE,2011,67,,o2831	P212121	12T5
YAFXAG	C14 H13 Cl2 N1 O2 S1/Omega=2.76%(Set #8)	2,4-Dichloro-N-(3,5-dimethylphenyl)benzenesulfonamide.	V.Z.Rodrigues,S.Foro,B.T.Gowda	ACTA CRYSTALLOGR.,SECT.E:STRUCT.REP.ONLINE,2011,67,,o2842	C2/c	12T33
YAGGEU	C15 H16 Cl1 N1 O2 S1/Omega=3.52%(Set #9)	4-Chloro-N-(2,6-dimethylphenyl)-2-methylbenzenesulfonamide.	V.Z.Rodrigues,S.Foro,B.T.Gowda	ACTA CRYSTALLOGR.,SECT.E:STRUCT.REP.ONLINE,2011,67,,o2890	P-1	fcu/cubic closest packing; 12/3/c1; sqc19
YAGMAV	C11 H13 N3 O2 S1/Omega=5.37%(Set #8)	N-Phenyl-3,5-dimethyl-4-pyrazolesulfonamide.	S.Parsons,M.Yaseen,K.Shaw,R.Ramage,P.A.Wood	PRIVATE COMMUNICATION,2004,,,	P21/c	fcu/cubic closest packing; 12/3/c1; sqc19
YAGYIQ	C38 H38 Br2 N4 O4 S2/Omega=3.71%(Set #6)	(E)-N,N'-bis[2-(5-bromo-1H-indol-3-yl)ethyl]-N,N'-(but-2-ene-1,4-diyl)bis(4-methylbenzenesulfonamide).	Yongbing Lou	ACTA CRYSTALLOGR.,SECT.E:STRUCT.REP.ONLINE,2011,67,,o2987	P-1	ild; sqc15
YAHJAU	C20 H20 N2 O4 S2/Omega=5.18%(Set #5)	N,N'-(1,3-Phenylenebis(methylene))dibenzenesulfonamide.	Ejaz,I.U.Khan,H.Ahmad,W.T.A.Harrison	ACTA CRYSTALLOGR.,SECT.E:STRUCT.REP.ONLINE,2011,67,,o3037	C2/c	fcu/cubic closest packing; 12/3/c1; sqc19
YAWBIJ	C22 H24 N2 O4 S2/Omega=4.18%(Set #9)	N,N'-(1,3-Phenylenebis(methylene))bis(4-methylbenzenesulfonamide).	Ejaz,I.U.Khan,W.T.A.Harrison,R.Anjum	ACTA CRYSTALLOGR.,SECT.E:STRUCT.REP.ONLINE,2012,68,,o950	P-1	fcu/cubic closest packing; 12/3/c1; sqc19
YAXKAL	C19 H19 N3 O4 S2/Omega=3.31%(Set #10)	N-(2-Aminopyridin-3-yl)-4-methyl-N-((4-methylphenyl)sulfonyl)benzenesulfonamide.	A.Taher,V.J.Smith	ACTA CRYSTALLOGR.,SECT.E:STRUCT.REP.ONLINE,2012,68,,o1136	P-1	fcu/cubic closest packing; 12/3/c1; sqc19
YAXKIT	C28 H33 F1 N2 O5 S1/Omega=2.19%(Set #6)	(2S,3R)-t-ButylN-[4-(N-benzyl-4-fluorobenzenesulfonamido)-3-hydroxy-1-phenylbutan-2-yl]carbamate.	M.Moreth,M.V.N.de Souza,J.L.Wardell,S.M.S.V.Wardell,E.R.T.Tiekink	ACTA CRYSTALLOGR.,SECT.E:STRUCT.REP.ONLINE,2012,68,,o1138	P21	hcp/hexagonal closest packing; 12/3/h1
YAXVOK	C11 H15 N3 O2 S1/Omega=3.93%(Set #8)	4-(2-((E)-Cyclopentylidene)hydrazin-1-yl)benzenesulfonamide.	A.O.Al-Youbi,A.M.Asiri,H.M.Faidallah,S.W.Ng,E.R.T.Tiekink	ACTA CRYSTALLOGR.,SECT.E:STRUCT.REP.ONLINE,2012,68,,o1196	P21/c	fcu/cubic closest packing; 12/3/c1; sqc19
YAZMOC	C23 H35 N3 O4 S1/Omega=3.86%(Set #6)	N-(3,3-bis((S)-4-Isopropyl-4,5-dihydro-oxazol-2-yl)butyl)-4-methylbenzenesulfonamide.	M.Seitz,C.Capacchione,S.Bellemin-Laponnaz,H.Wadepohl,B.D.Ward,L.H.Gade	DALTON TRANS.,2006,,,193	P21	fcu/cubic closest packing; 12/3/c1; sqc19
YIFZAP	C6 H7 N1 O2 S1/Omega=3.15%(Set #6)	Benzenesulfonamide.	B.T.Gowda,R.Nayak,J.Kozisek,M.Tokarcik,H.Fuess	ACTA CRYSTALLOGR.,SECT.E:STRUCT.REP.ONLINE,2007,63,,o2967	Pc	fcu/cubic closest packing; 12/3/c1; sqc19
YIFZET	C8 H11 N1 O2 S1/Omega=3.55%(Set #7)	3,4-Dimethylbenzenesulfonamide.	B.T.Gowda,R.Nayak,S.Foro,J.Kozisek,H.Fuess	ACTA CRYSTALLOGR.,SECT.E:STRUCT.REP.ONLINE,2007,63,,o2968	P21/c	hcp/hexagonal closest packing; 12/3/h1
YIRWAY	C15 H14 N2 O3 S2/Omega=3.56%(Set #8)	4-Methoxy-N-(6-methyl-2,3-dihydro-1,3-benzothiazol-2-ylidene)benzenesulfonamide.	G.Navarrete-Vazquez,H.Moreno-Diaz,R.Villalobos-Molina,S.Estrada-Soto,H.Tlahuext	ACTA CRYSTALLOGR.,SECT.E:STRUCT.REP.ONLINE,2008,64,,o227	P21/c	12T91
YIXLEX	C19 H17 Cl1 N4 O3 S1/Omega=4.49%(Set #7)	4-(5-Chloro-2-hydroxybenzylideneamino)-N-(4,6-dimethylpyrimidin-2-yl)benzenesulfonamide.	Z.H.Chohan,M.N.Tahir,H.A.Shad,I.U.Khan	ACTA CRYSTALLOGR.,SECT.E:STRUCT.REP.ONLINE,2008,64,,o648	Pbca	12T46
YODFIH	C18 H26 N2 O6 S2/Omega=5.12%(Set #7)	N,N'-Diisopropyl-3,6-dimethoxynaphthalene-2,7-disulfonamide.	Zu-Wei Song,Zhi-Qiang Hu	ACTA CRYSTALLOGR.,SECT.E:STRUCT.REP.ONLINE,2008,64,,o1499	P21/c	12T25
YOTVAF	C12 H16 Cl1 N1 O4 S2/Omega=2.38%(Set #6)	(2S)-Methyl 2-(4-chlorobenzenesulfonamido)-4-(methylsulfanyl)butanoate.	T.Syed,S.Hameed,P.G.Jones	ACTA CRYSTALLOGR.,SECT.E:STRUCT.REP.ONLINE,2009,65,,o1348	P212121	12T5
YOVBIV	C12 H12 N2 O2 S1/Omega=4.14%(Set #8)	N-Benzyl-2-pyridinesulfonamide.	Xiao-Ping Chen,Shou-Fa Han	ACTA CRYSTALLOGR.,SECT.E:STRUCT.REP.ONLINE,2009,65,,o1414	P21/c	fcu/cubic closest packing; 12/3/c1; sqc19
YOVJID	C13 H10 Br1 N1 O4 S1/Omega=4.95%(Set #8)	2-(4-Bromobenzenesulfonamido)benzoic acid.	M.N.Arshad,I.U.Khan,M.Akkurt,M.Shafiq,G.Mustafa	ACTA CRYSTALLOGR.,SECT.E:STRUCT.REP.ONLINE,2009,65,,o1610	C2/c	fcu/cubic closest packing; 12/3/c1; sqc19
YUCCIJ01	C14 H11 Cl1 N2 O4 S1/Omega=2.69%(Set #9)	2-Chloro-5-(1-hydroxy-3-oxo-2,3-dihydro-1H-isoindol-1-yl)benzenesulfonamide.	F.T.Martins,M.D.Bocelli,R.Bonfilio,M.B.de Araujo,P.V.de Lima,P.P.Neves,M.P.Veloso,J.Ellena,A.C.Doriguetto	CRYST.GROWTH DES.,2009,9,,3235	P-1	hcp/hexagonal closest packing; 12/3/h1
YUKKUK	C17 H19 N3 O3 S1/Omega=3.12%(Set #6)	5-(Dimethylamino)-N-(3,4-dimethyl-5-isoxazolyl)-1-naphthalenesulfonamide.	P.D.Stein,D.M.Floyd,S.Bisaha,J.Dickey,R.N.Girotra,J.Z.Gougoutas,M.Kozlowski,V.G.Lee,E.C.-K.Liu,M.F.Malley,D.McMullen,C.Mitchell,S.Moreland,N.Murugesan,R.Serafino,M.L.Webb,Rongan Zhang,J.T.Hunt	J.Med.Chem.,1995,38,,1344	Pna21	12T75
YUPXEN	C15 H16 N2 O6 S2/Omega=2.50%(Set #8)	N-([4-(4-Methoxybenzenesulfonamido)phenyl]sulfonyl)acetamide.	G.Mustafa,M.Akkurt,I.U.Khan,R.Naseem,B.Sajjad	ACTA CRYSTALLOGR.,SECT.E:STRUCT.REP.ONLINE,2010,66,,o1768	P21/c	12T8
ZAHBEP	C7 H12 N4 O4 S2/Omega=2.80%(Set #8)	5-t-Butyloxycarbonylamido-1,3,4-thiadiazole-2-sulfonamide.	J.C.Pedregosa,J.Casanova,G.Alzuet,J.Borras,S.Garcia-Granda,M.R.Diaz,A.Gutierrez-Rodriguez	INORG.CHIM.ACTA,1995,232,,117	P21/n	hcp/hexagonal closest packing; 12/3/h1
ZAMROU	C18 H15 N3 O4 S1/Omega=2.94%(Set #8)	3-Nitro-N-phenyl-4-(phenylamino)benzenesulfonamide.	M.L.Glowka,Z.Olubek,A.Olczak	ACTA CRYSTALLOGR.,SECT.C:CRYST.STRUCT.COMMUN.,1995,51,,1639	P21/c	bcu-x/ 14-conn;I m -3 m->I b c a (a-b,a+b,2c; 1/4,1/4,3/4);Bond sets: 2,3,4,5,6:bcu-x
ZAPJAD	C9 H11 N3 O3 S2/Omega=3.80%(Set #9)	2-(Ethylsulfinyl)imidazo[1,2-a]pyridine-3-sulfonamide.	Y.Gong,H.Ma,J.Li	ACTA CRYSTALLOGR.,SECT.E:STRUCT.REP.ONLINE,2012,68,,o1342	P-1	fcu/cubic closest packing; 12/3/c1; sqc19
ZAQQAL	C13 H10 N2 O5 S1/Omega=3.69%(Set #6)	N-(3-Nitrobenzoyl)benzenesulfonamide.	P.A.Suchetan,S.Foro,B.T.Gowda	ACTA CRYSTALLOGR.,SECT.E:STRUCT.REP.ONLINE,2012,68,,o1507	P212121	fcu/cubic closest packing; 12/3/c1; sqc19
ZZZPUS01	C12 H18 N2 O3 S1/Omega=3.26%(Set #6)	N-((Butylamino)-carbonyl)-4-methyl-benzenesulfonamide.	K.A.Nirmala,D.S.S.Gowda	ACTA CRYSTALLOGR.,SECT.B:STRUCT.CRYSTALLOGR.CRYST.CHEM.,1981,37,,1597	Pn21a	fcu/cubic closest packing; 12/3/c1; sqc19
ZZZPUS04	C12 H18 N2 O3 S1/Omega=3.83%(Set #6)	N-(Butylcarbamoyl)-4-methylbenzenesulfonamide.	S.Thirunahari,S.Aitipamula,Pui Shan Chow,R.B.H.Tan	J.Pharm.Sci.,2010,99,,2975	Pna21	fcu/cubic closest packing; 12/3/c1; sqc19
ZZZPUS06	C12 H18 N2 O3 S1/Omega=3.64%(Set #7)	N-(Butylcarbamoyl)-4-methylbenzenesulfonamide.	S.Thirunahari,S.Aitipamula,Pui Shan Chow,R.B.H.Tan	J.Pharm.Sci.,2010,99,,2975	P21/n	hcp/hexagonal closest packing; 12/3/h1
ZZZULS01	C7 H9 N1 O2 S1/Omega=2.32%(Set #7)	o-Toluenesulfonamide.	M.Tremayne,C.C.Seaton,C.Glidewell	ACTA CRYSTALLOGR.,SECT.B:STRUCT.SCI.,2002,58,,823	I41/a	12T92
ZZZULS02	C7 H9 N1 O2 S1/Omega=2.27%(Set #7)	2-Methylbenzenesulfonamide.	B.T.Gowda,S.Foro,K.Shakuntala,H.Fuess	ACTA CRYSTALLOGR.,SECT.E:STRUCT.REP.ONLINE,2009,65,,o2258	I41/a	12T92
ACUWEC	C38 H37 N1 O3 S1 Si1/Omega=3.04%(Set #7)	N-(2-(1,1-Diphenyl-1H-2,1-benzoxasilin-3-yl)-1-phenylpentyl)-4-methylbenzenesulfonamide.	Dongjin Kang,Sangjune Park,Taekyu Ryu,P.Ho Lee	Org.Lett.,2012,14,,3912	P21/c	ild; sqc15
BEDMIG13	C10 H13 Cl1 N2 O3 S1/Omega=2.04%(Set #6)	4-Chloro-N-(propylaminocarbonyl)benzenesulfonamide.	Y.V.Seryotkin,T.N.Drebushchak,E.V.Boldyreva	ACTA CRYSTALLOGR.,SECT.B:STRUCT.SCI.,2013,69,,77	P212121	12T5
BEDMIG14	C10 H13 Cl1 N2 O3 S1/Omega=1.99%(Set #6)	4-Chloro-N-(propylaminocarbonyl)benzenesulfonamide.	Y.V.Seryotkin,T.N.Drebushchak,E.V.Boldyreva	ACTA CRYSTALLOGR.,SECT.B:STRUCT.SCI.,2013,69,,77	P212121	12T5
BEDMIG15	C10 H13 Cl1 N2 O3 S1/Omega=1.98%(Set #6)	4-Chloro-N-(propylaminocarbonyl)benzenesulfonamide.	Y.V.Seryotkin,T.N.Drebushchak,E.V.Boldyreva	ACTA CRYSTALLOGR.,SECT.B:STRUCT.SCI.,2013,69,,77	P212121	12T5
BEDMIG16	C10 H13 Cl1 N2 O3 S1/Omega=2.02%(Set #6)	4-Chloro-N-(propylaminocarbonyl)benzenesulfonamide.	Y.V.Seryotkin,T.N.Drebushchak,E.V.Boldyreva	ACTA CRYSTALLOGR.,SECT.B:STRUCT.SCI.,2013,69,,77	P212121	12T5
BEGWOB	C15 H23 N1 O5 S1 Si1/Omega=2.95%(Set #6)	N-(6-Methoxy-4-oxo-3,4-dihydro-2H-chromen-3-yl)-2-(trimethylsilyl)ethanesulfonamide.	Y.Fukunaga,T.Uchida,Y.Ito,K.Matsumoto,T.Katsuki	Org.Lett.,2012,14,,4658	P212121	12T77
BEWYAF	C22 H22 N2 O2 S1/Omega=5.26%(Set #6)	4-Methyl-N-(2-phenyl-1,2,3,4-tetrahydroquinolin-3-yl)benzenesulfonamide.	Xian-Feng Cai,Mu-Wang Chen,Zhi-Shi Ye,Ran-Ning Guo,Lei Shi,Yan-Qin Li,Yong-Gui Zhou	Chem.Asian J.,2013,8,,1381	P212121	hcp/hexagonal closest packing; 12/3/h1
BOVBOE01	C14 H19 N3 O2 S1/Omega=5.02%(Set #6)	N-(2-Aminoethyl)-5-(dimethylamino)naphthalene-1-sulfonamide.	R.C.Knighton,M.R.Sambrook,J.C.Vincent,S.A.Smith,C.J.Serpell,J.Cookson,M.S.Vickers,P.D.Beer	CHEM.COMMUN.,2013,49,,2293	P21cn	12T21
CECJEB	C24 H23 N1 O3 S1/Omega=3.30%(Set #9)	4-Methyl-N-((1-oxo-1,2,3,4-tetrahydronaphthalen-2-yl)(phenyl)methyl)benzenesulfonamide.	Qunsheng Guo,John Cui-Gao Zhao,H.Arman	TETRAHEDRON LETT.,2012,53,,4866	P-1	hcp/hexagonal closest packing; 12/3/h1
CECJIF	C24 H25 N1 O3 S1/Omega=2.83%(Set #8)	N-((1-Hydroxy-1,2,3,4-tetrahydronaphthalen-2-yl)(phenyl)methyl)-4-methylbenzenesulfonamide.	Qunsheng Guo,John Cui-Gao Zhao,H.Arman	TETRAHEDRON LETT.,2012,53,,4866	P21/n	12T94
CEDCAR	C14 H12 N2 O3 S1/Omega=2.52%(Set #6)	4-Cyano-N-(4-methoxyphenyl)benzenesulfonamide.	T.Gelbrich,T.L.Threlfall,M.B.Hursthouse	ACTA CRYSTALLOGR.,SECT.C:CRYST.STRUCT.COMMUN.,2012,68,,o421	Pna21	hcp/hexagonal closest packing; 12/3/h1
CEDCEV	C14 H12 F3 N1 O3 S1/Omega=2.76%(Set #6)	N-(4-Methoxyphenyl)-4-(trifluoromethyl)benzenesulfonamide.	T.Gelbrich,T.L.Threlfall,M.B.Hursthouse	ACTA CRYSTALLOGR.,SECT.C:CRYST.STRUCT.COMMUN.,2012,68,,o421	Pna21	hcp/hexagonal closest packing; 12/3/h1
CEDCIZ	C13 H12 I1 N1 O3 S1/Omega=2.13%(Set #6)	4-Iodo-N-(4-methoxyphenyl)benzenesulfonamide.	T.Gelbrich,T.L.Threlfall,M.B.Hursthouse	ACTA CRYSTALLOGR.,SECT.C:CRYST.STRUCT.COMMUN.,2012,68,,o421	Pna21	hcp/hexagonal closest packing; 12/3/h1
CEDCOF	C13 H12 Br1 N1 O3 S1/Omega=2.20%(Set #6)	4-Bromo-N-(4-methoxyphenyl)benzenesulfonamide.	T.Gelbrich,T.L.Threlfall,M.B.Hursthouse	ACTA CRYSTALLOGR.,SECT.C:CRYST.STRUCT.COMMUN.,2012,68,,o421	Pna21	12T21
CEDDAS	C13 H12 Cl1 N1 O3 S1/Omega=1.89%(Set #6)	4-Chloro-N-(4-methoxyphenyl)benzenesulfonamide.	T.Gelbrich,T.L.Threlfall,M.B.Hursthouse	ACTA CRYSTALLOGR.,SECT.C:CRYST.STRUCT.COMMUN.,2012,68,,o421	Pna21	12T21
CEDDEW	C13 H12 F1 N1 O3 S1/Omega=3.53%(Set #6)	4-Fluoro-N-(4-methoxyphenyl)benzenesulfonamide.	T.Gelbrich,T.L.Threlfall,M.B.Hursthouse	ACTA CRYSTALLOGR.,SECT.C:CRYST.STRUCT.COMMUN.,2012,68,,o421	Pna21	12T21
CEDDIA	C13 H12 Cl1 N1 O3 S1/Omega=3.07%(Set #6)	N-(4-Chlorophenyl)-4-methoxybenzenesulfonamide.	T.Gelbrich,T.L.Threlfall,M.B.Hursthouse	ACTA CRYSTALLOGR.,SECT.C:CRYST.STRUCT.COMMUN.,2012,68,,o421	Pna21	hcp/hexagonal closest packing; 12/3/h1
CEDDOG	C13 H10 N2 O2 S1/Omega=3.39%(Set #6)	4-Cyano-N-phenylbenzenesulfonamide.	T.Gelbrich,T.L.Threlfall,M.B.Hursthouse	ACTA CRYSTALLOGR.,SECT.C:CRYST.STRUCT.COMMUN.,2012,68,,o421	Pna21	hcp/hexagonal closest packing; 12/3/h1
CEFMEH	C14 H14 N2 O4 S1/Omega=2.81%(Set #21)	N-(3,5-Dimethylphenyl)-2-nitrobenzenesulfonamide.	U.Chaithanya,S.Foro,B.T.Gowda	ACTA CRYSTALLOGR.,SECT.E:STRUCT.REP.ONLINE,2012,68,,o2823	P21/c	fcu/cubic closest packing; 12/3/c1; sqc19
CEFMEH	C14 H14 N2 O4 S1/Omega=3.93%(Set #20)	N-(3,5-Dimethylphenyl)-2-nitrobenzenesulfonamide.	U.Chaithanya,S.Foro,B.T.Gowda	ACTA CRYSTALLOGR.,SECT.E:STRUCT.REP.ONLINE,2012,68,,o2823	P21/c	fcu/cubic closest packing; 12/3/c1; sqc19
CEFWAN	C12 H10 N2 O4 S1/Omega=3.90%(Set #6)	4-Nitro-N-phenylbenzenesulfonamide.	U.Chaithanya,S.Foro,B.T.Gowda	ACTA CRYSTALLOGR.,SECT.E:STRUCT.REP.ONLINE,2012,68,,o2872	Cc	hcp/hexagonal closest packing; 12/3/h1
CEYDIV	C17 H28 N2 O2 S1/Omega=3.33%(Set #6)	(1R,2R,5R)-N-(2-Amino-5-isopropyl-2-methyl-cyclohexyl)-4-methyl-benzenesulfonamide.	P.Roszkowski,J.K.Maurin,Z.Czarnocki	TETRAHEDRON:ASYMM.,2013,24,,643	P21	fcu/cubic closest packing; 12/3/c1; sqc19
CEYDOB	C17 H28 N2 O2 S1/Omega=1.44%(Set #6)	(1S,2S,4R)-N-(2-Amino-4-isopropyl-1-methyl-cyclohexyl)-4-methyl-benzenesulfonamide.	P.Roszkowski,J.K.Maurin,Z.Czarnocki	TETRAHEDRON:ASYMM.,2013,24,,643	P21	fcu/cubic closest packing; 12/3/c1; sqc19
DEHGEE	C15 H21 N1 O2 S1/Omega=2.25%(Set #6)	N-(1-(Cyclohex-1-en-1-yl)ethyl)-4-methylbenzenesulfonamide.	A.-F.Voica,A.Mendoza,W.R.Gutekunst,J.Otero,P.S.Baran	Nature Chemistry,2012,4,,629	P21	fcu/cubic closest packing; 12/3/c1; sqc19
DEHGUU	C27 H35 N1 O2 S1/Omega=3.36%(Set #6)	N-(Abieta-2,8(14),9(11),12-tetraen-18-yl)-4-methylbenzenesulfonamide.	A.-F.Voica,A.Mendoza,W.R.Gutekunst,J.Otero,P.S.Baran	Nature Chemistry,2012,4,,629	P212121	bcu-x/ 14-conn;I m -3 m->P n m a (2a,c,-b; 1/4,1/4,1/4);Bond sets: 2,3,4,5,6:bcu-x
ECEWOA	C15 H20 N2 O7 S1/Omega=4.82%(Set #6)	N-(2-Hydroxy-1-(4-isopropyl-5-oxotetrahydrofuran-2-yl)ethyl)-2-nitrobenzenesulfonamide.	Y.Nakamura,Y.Ogawa,C.Suzuki,T.Fujimoto,S.Miyazaki,K.Tamaki,T.Nishi,H.Suemune	Heterocycles,2011,83,,1587	P212121	hcp/hexagonal closest packing; 12/3/h1
FEXDIX	C23 H21 N1 O4 S1/Omega=3.87%(Set #8)	N-(2-Benzoyl-3-hydroxy-2,3-dihydro-1H-inden-1-yl)-4-methylbenzenesulfonamide.	Hui Qian,Wanxiang Zhao,H.H.-Y.Sung,I.D.Williams,Jianwei Sun	CHEM.COMMUN.,2013,49,,4361	C2/c	12T95
GEQDEN	C6 H11 F3 N2 O2 S1/Omega=1.97%(Set #19)	1,1,1-Trifluoro-N-(pyrrolidin-2-ylmethyl)methanesulfonamide.	A.L.Rheingold	PRIVATE COMMUNICATION,2012,,,	P21	hcp/hexagonal closest packing; 12/3/h1
GEQDEN	C6 H11 F3 N2 O2 S1/Omega=2.23%(Set #18)	1,1,1-Trifluoro-N-(pyrrolidin-2-ylmethyl)methanesulfonamide.	A.L.Rheingold	PRIVATE COMMUNICATION,2012,,,	P21	hcp/hexagonal closest packing; 12/3/h1
HAZSAE	C17 H23 N1 O2 S1/Omega=3.66%(Set #6)	4-Methyl-N-(2-methyl-5-(prop-1-en-2-yl)cyclohex-2-en-1-yl)benzenesulfonamide.	V.Ganesh,D.Sureshkumar,D.Chanda,S.Chandrasekaran	Chem.-Eur.J.,2012,18,,12498	P212121	12T5
KEKDUB	C14 H14 Cl1 N1 O3 S1/Omega=2.03%(Set #7)	N-(3-Chloro-4-hydroxy-2,5-dimethylphenyl)benzenesulfonamide.	A.P.Avdeenko,S.A.Konovalova,O.N.Mikhailichenko,A.L.Yusina,A.A.Santalova,G.V.Palamarchuk,R.I.Zubatyuk,O.V.Shishkin,K.S.Burmistrov	ZH.ORG.KHIM.(RUSS.)(RUSS.J.ORG.CHEM.),2011,47,,1151	P21/c	12T83
KEPPAY	C20 H24 Cl1 N1 O2 S1/Omega=3.23%(Set #7)	N-(4-Chloro-5-methyl-1-phenylhex-1-en-3-yl)-4-methylbenzenesulfonamide.	G.R.Stanton,P.-O.Norrby,P.J.Carroll,P.J.Walsh	J.AM.CHEM.SOC.,2012,134,,17599	P21/c	12T56
KIRLOO	C24 H27 N1 O5 S1/Omega=3.17%(Set #8)	N-(3,4-Dimethoxybenzyl)-N-(2-hydroxy-2-phenylethyl)-4-methylbenzenesulfonamide.	Shaowu Wang,Zhuo Chai,Shaowu Wang,Xiancui Zhu,Yun Wei	Org.Lett.,2013,52,,2628	C2/c	fcu/cubic closest packing; 12/3/c1; sqc19
KUSVEZ03	C7 H9 N1 O2 S1/Omega=0.51%(Set #19)	4-Methylbenzenesulfonamide.	T.N.Drebushchak,N.A.Pankrushina,A.N.Mikheev,M.K.A.Thumm	CRYSTENGCOMM,2013,15,,3582	P1	fcu/cubic closest packing; 12/3/c1; sqc19
KUSVEZ03	C7 H9 N1 O2 S1/Omega=2.32%(Set #18)	4-Methylbenzenesulfonamide.	T.N.Drebushchak,N.A.Pankrushina,A.N.Mikheev,M.K.A.Thumm	CRYSTENGCOMM,2013,15,,3582	P1	fcu/cubic closest packing; 12/3/c1; sqc19
LESJOK	C19 H17 N1 O4 S1/Omega=3.77%(Set #8)	2-(Naphthalene-1-sulfonamido)-3-phenylpropanoic acid.	H.Mubashar-ur-Rehman,M.N.Arshad,A.M.Asiri,I.U.Khan,M.Bilal	ACTA CRYSTALLOGR.,SECT.E:STRUCT.REP.ONLINE,2013,69,,o194	P21/n	12T8
LESZUG	C16 H14 Cl1 N3 O2 S1/Omega=3.17%(Set #8)	4-(5-(4-Chlorophenyl)-3-methyl-1H-pyrazol-1-yl)benzenesulfonamide.	M.A.Farrukh,S.K.Mohamed,M.Ahmed,A.A.Marzouk,S.M.El-Moghazy	ACTA CRYSTALLOGR.,SECT.E:STRUCT.REP.ONLINE,2013,69,,o295	P21/c	12T96
LETKEC	C13 H17 N3 O3 S1/Omega=3.32%(Set #8)	N-(3-Isopropyl-2-oxoimidazolidin-4-ylidene)-4-methylbenzenesulfonamide.	M.Garcia-Valverde,S.Marcaccini,A.Gonzalez-Ortega,F.J.Rodriguez,J.Rojo,T.Torroba	ORG.BIOMOL.CHEM.,2013,11,,721	P21/c	12T12
LETKIG	C23 H27 N3 O3 S1/Omega=2.50%(Set #6)	N-(3-Benzyl-4-oxo-1,3-diazaspiro[4.6]undec-2-ylidene)-4-methylbenzenesulfonamide.	M.Garcia-Valverde,S.Marcaccini,A.Gonzalez-Ortega,F.J.Rodriguez,J.Rojo,T.Torroba	ORG.BIOMOL.CHEM.,2013,11,,721	P21	fcu/cubic closest packing; 12/3/c1; sqc19
MEGKUG	C28 H33 N1 O3 S1/Omega=3.20%(Set #6)	N-(4-((2-Cyclohexylpropoxy)methyl)phenyl)biphenyl-4-sulfonamide.	Chu-Ting Yang,Zhen-Qi Zhang,Jun Liang,Jing-Hui Liu,Xiao-Yu Lu,Huan-Huan Chen,Lei Liu	J.AM.CHEM.SOC.,2012,134,,11124	P21	12T11
MEHDIO	C20 H25 N1 O2 S1/Omega=5.02%(Set #9)	N-(1-Butyl-2,3-dihydro-1H-inden-2-yl)-4-methylbenzenesulfonamide.	Chung-Yang Huang,A.G.Doyle	J.AM.CHEM.SOC.,2012,134,,9541	P-1	fcu/cubic closest packing; 12/3/c1; sqc19
MEHDOU	C19 H25 N1 O2 S1/Omega=1.69%(Set #6)	(S)-4-Methyl-N-(2-phenylhexyl)benzenesulfonamide.	Chung-Yang Huang,A.G.Doyle	J.AM.CHEM.SOC.,2012,134,,9541	P21	fcu/cubic closest packing; 12/3/c1; sqc19
PECSOH	C12 H9 Cl1 N2 O4 S1/Omega=1.44%(Set #21)	N-(3-Chlorophenyl)-4-nitrobenzenesulfonamide.	U.Chaithanya,S.Foro,B.T.Gowda	ACTA CRYSTALLOGR.,SECT.E:STRUCT.REP.ONLINE,2012,68,,o3424	P21/n	12,12T4
PECSOH	C12 H9 Cl1 N2 O4 S1/Omega=3.87%(Set #20)	N-(3-Chlorophenyl)-4-nitrobenzenesulfonamide.	U.Chaithanya,S.Foro,B.T.Gowda	ACTA CRYSTALLOGR.,SECT.E:STRUCT.REP.ONLINE,2012,68,,o3424	P21/n	12,12T4
PECSUN	C14 H14 N2 O4 S1/Omega=2.87%(Set #19)	N-(3,5-Dimethylphenyl)-4-nitrobenzenesulfonamide.	U.Chaithanya,S.Foro,B.T.Gowda	ACTA CRYSTALLOGR.,SECT.E:STRUCT.REP.ONLINE,2012,68,,o3425	Pna21	12,12T5
PECTAU	C14 H14 N2 O4 S1/Omega=2.81%(Set #9)	N-(2,5-Dimethylphenyl)-2-nitrobenzenesulfonamide.	U.Chaithanya,S.Foro,B.T.Gowda	ACTA CRYSTALLOGR.,SECT.E:STRUCT.REP.ONLINE,2012,68,,o3426	P-1	fcu/cubic closest packing; 12/3/c1; sqc19
PECTOI	C11 H15 Cl1 N2 O3 S1/Omega=4.61%(Set #7)	4-(3-Chloro-2,2-dimethylpropanamido)benzenesulfonamide.	S.P.Yalcin,M.Akkurt,M.Durgun,B.Turkkan,H.Turkmen	ACTA CRYSTALLOGR.,SECT.E:STRUCT.REP.ONLINE,2012,68,,o3430	P21/c	12T56
PEDCUY	C12 H8 Cl2 N2 O4 S1/Omega=5.24%(Set #10)	N-(3,5-Dichlorophenyl)-2-nitrobenzenesulfonamide.	U.Chaithanya,S.Foro,B.T.Gowda	ACTA CRYSTALLOGR.,SECT.E:STRUCT.REP.ONLINE,2012,68,,o3482	P-1	fcu/cubic closest packing; 12/3/c1; sqc19
PEFKOC	C18 H14 F1 N1 O3 S1/Omega=2.85%(Set #8)	3-Fluoro-N-(2-phenoxyphenyl)benzenesulfonamide.	S.Terada,K.Katagiri,H.Masu,H.Danjo,Y.Sei,M.Kawahata,M.Tominaga,K.Yamaguchi,I.Azumaya	CRYST.GROWTH DES.,2012,12,,2908	P21/n	12T97
PEFLET	C18 H10 F5 N1 O3 S1/Omega=2.73%(Set #8)	2,3,4,5,6-Pentafluoro-N-(2-phenoxyphenyl)benzenesulfonamide.	S.Terada,K.Katagiri,H.Masu,H.Danjo,Y.Sei,M.Kawahata,M.Tominaga,K.Yamaguchi,I.Azumaya	CRYST.GROWTH DES.,2012,12,,2908	P21/n	fcu/cubic closest packing; 12/3/c1; sqc19
QECLER	C13 H12 N2 O4 S1/Omega=5.39%(Set #8)	N-(3-Methylphenyl)-2-nitrobenzenesulfonamide.	U.Chaithanya,S.Foro,B.T.Gowda	ACTA CRYSTALLOGR.,SECT.E:STRUCT.REP.ONLINE,2012,68,,o2627	P21/c	fcu/cubic closest packing; 12/3/c1; sqc19
QECPIZ	C13 H12 N2 O4 S1/Omega=5.09%(Set #7)	N-(2-Methylphenyl)-2-nitrobenzenesulfonamide.	U.Chaithanya,S.Foro,B.T.Gowda	ACTA CRYSTALLOGR.,SECT.E:STRUCT.REP.ONLINE,2012,68,,o2649	P21/c	hcp/hexagonal closest packing; 12/3/h1
QEWDUT	C18 H17 F2 N3 O4 S1/Omega=2.95%(Set #20)	N-(2,4-Difluorophenyl)-3-ethyl-3-methyl-2,5-dioxo-2,3,4,5-tetrahydro-1H-1,4-benzodiazepine-7-sulfonamide.	J.G.Barlind,L.K.Buckett,S.G.Crosby,O.Davidsson,H.Emtenas,A.Ertan,U.Jurva,M.Lemurell,P.M.Gutierrez,K.Nilsson,G.OMahony,A.U.Petersson,A.Redzic,F.Wagberg,Zhong-Qing Yuan	BIOORG.MED.CHEM.LETT.,2013,23,,2721	P21	fcu/cubic closest packing; 12/3/c1; sqc19
RENCEU	C17 H24 Br1 Cl1 N2 O5 S1/Omega=2.30%(Set #8)	N-(2-((1-(Bromomethyl)cycloheptyl)oxy)-3-chloropropyl)-4-nitrobenzenesulfonamide.	Jing Zhou,Ling Zhou,Ying-Yeung Yeung	Org.Lett.,2012,14,,5250	P21/c	12T94
REPXER	C20 H17 N3 O4 S1/Omega=3.09%(Set #7)	N-(9-Ethyl-9H-carbazol-3-yl)-2-nitrobenzenesulfonamide.	S.Sudalai Kumar,S.Rana,Ashwini Nangia	Chem.Asian J.,2013,8,,1551	Pbca	hcp/hexagonal closest packing; 12/3/h1
REPXUH	C21 H17 F3 N2 O2 S1/Omega=2.64%(Set #6)	N-(9-Ethyl-9H-carbazol-3-yl)-4-(trifluoromethyl)benzenesulfonamide.	S.Sudalai Kumar,S.Rana,Ashwini Nangia	Chem.Asian J.,2013,8,,1551	P21	12T11
REXXAV	C11 H17 N3 O3 S1/Omega=4.07%(Set #7)	2-(2-Aminophenylsulfonamido)-N,2-dimethylpropanamide.	S.S.Kale,G.Priya,A.S.Kotmale,R.L.Gawade,V.G.Puranik,P.R.Rajamohanan,G.J.Sanjayan	CHEM.COMMUN.,2013,49,,2222	P21/c	fcu/cubic closest packing; 12/3/c1; sqc19
RIDGOC	C21 H24 N4 O6 S1/Omega=4.66%(Set #6)	5-(Dimethylamino)-N-(1-(4-hydroxy-5-(hydroxymethyl)tetrahydrofuran-2-yl)-2-oxo-1,2-dihydropyrimidin-4-yl)naphthalene-1-sulfonamide.	Ki Tae Kim,Hyun Woo Kim,Dohyun Moon,Young Min Rhee,Byeang Hyean Kim	ORG.BIOMOL.CHEM.,2013,11,,5605	P21	fcu/cubic closest packing; 12/3/c1; sqc19
SEBZUW	C24 H27 Br1 N4 O4 S2/Omega=2.38%(Set #8)	N-(2-((5-Bromo-2-(morpholin-4-yl)pyrimidin-4-yl)sulfanyl)-4-methoxyphenyl)-2,4,6-trimethylbenzenesulfonamide.	M.Kumar,L.Mallesha,M.A.Sridhar,K.Kapoor,V.K.Gupta,R.Kant	ACTA CRYSTALLOGR.,SECT.E:STRUCT.REP.ONLINE,2012,68,,o3061	P21/n	fcu/cubic closest packing; 12/3/c1; sqc19
SECWII	C14 H14 N2 O4 S1/Omega=1.20%(Set #23)	N-(2,3-Dimethylphenyl)-2-nitrobenzenesulfonamide.	U.Chaithanya,S.Foro,B.T.Gowda	ACTA CRYSTALLOGR.,SECT.E:STRUCT.REP.ONLINE,2012,68,,o3188	P-1	12,12T7
SECWII	C14 H14 N2 O4 S1/Omega=2.33%(Set #22)	N-(2,3-Dimethylphenyl)-2-nitrobenzenesulfonamide.	U.Chaithanya,S.Foro,B.T.Gowda	ACTA CRYSTALLOGR.,SECT.E:STRUCT.REP.ONLINE,2012,68,,o3188	P-1	12,12T7
SEDLIY	C11 H17 N1 O4 S1/Omega=3.34%(Set #7)	N,N-bis(2-hydroxyethyl)-4-methylbenzenesulfonamide.	N.Mushtaq,I.U.Khan,M.Yar,S.Afzal,J.Simpson	ACTA CRYSTALLOGR.,SECT.E:STRUCT.REP.ONLINE,2012,68,,o3142	Pbca	12T19
SEFKAR	C16 H20 N2 O4 S2/Omega=5.36%(Set #4)	N,N'-Ethane-1,2-diylbis(3-methylbenzenesulfonamide).	H.Alyar,S.Alyar,A.Unal,N.Ozbek,E.Sahin,N.Karacan	J.MOL.STRUCT.,2012,1028,,116	P21/c	12T6
SERKAD	C19 H16 Cl1 N1 O2 S1/Omega=1.63%(Set #10)	N-(5-Chlorobiphenyl-2-yl)-4-methylbenzenesulfonamide.	Liuqun Gu,Ting Lu,Mingyun Zhang,Lijuan Tou,Yugen Zhang	ADV.SYNTH.CATAL.,2013,355,,1077	P-1	fcu/cubic closest packing; 12/3/c1; sqc19
SEWNUF	C23 H23 F1 N8 O7 S1/Omega=3.20%(Set #20)	(R)-3-((4-((2-(4-Fluorophenylsulfonamido)-3-methylbutanamido)methyl)-1H-1,2,3-triazol-1-yl)methyl)-4-(4-nitrophenyl)-1,2,5-oxadiazole 2-oxide.	I.T.Schiefer,L.VandeVrede,M.Fa,O.Arancio,G.R.J.Thatcher	J.Med.Chem.,2012,55,,3076	P212121	12,12T8
SULDAZ05	C10 H10 N4 O2 S1/Omega=3.48%(Set #8)	4-Amino-N-(pyrimidin-2-yl)benzenesulfonamide.	Fangfang Pan,Ruimin Wang,U.Englert	CRYSTENGCOMM,2013,15,,1164	P21/c	12T77
SULDAZ06	C10 H10 N4 O2 S1/Omega=3.81%(Set #8)	4-Amino-N-(pyrimidin-2-yl)benzenesulfonamide.	Fangfang Pan,Ruimin Wang,U.Englert	CRYSTENGCOMM,2013,15,,1164	P21/c	12T77
TEMBEU	C14 H15 N1 O2 S1/Omega=2.60%(Set #7)	N-(4'-Methylbiphenyl-4-yl)methanesulfonamide.	C.B.Baltus,N.J.Press,M.D.Antonijevic,G.J.Tizzard,S.J.Coles,J.Spencer	TETRAHEDRON,2012,68,,9272	Pbca	hcp/hexagonal closest packing; 12/3/h1
VEGTIM	C11 H9 I1 N2 O2 S1/Omega=2.11%(Set #8)	N-(5-Iodopyridin-2-yl)benzenesulfonamide.	T.Gelbrich,T.L.Threlfall,M.B.Hursthouse	CRYSTENGCOMM,2012,14,,5454	P21/c	12T15
VEKQOT	C10 H10 Cl1 F1 N2 O4 S1/Omega=2.65%(Set #7)	5-(Chloromethyl)-N-(3-fluorophenyl)-2-oxo-1,3-oxazolidine-3-sulfonamide.	C.Barbey,R.Bouasla,M.Berredjem,N.Dupont,P.Retailleau,N.-E.Aouf,M.Lecouvey	TETRAHEDRON,2012,68,,9125	P21/c	hcp/hexagonal closest packing; 12/3/h1
VEMJUU	C17 H24 N4 O2 S1/Omega=3.90%(Set #6)	(1S,2S,4R)-(+)-N-(2-Azido-1-methyl-4-(prop-1-en-2-yl)cyclohexyl)-4-methylbenzenesulfonamide.	P.Roszkowski,J.K.Maurin,Z.Czarnocki	TETRAHEDRON:ASYMM.,2012,23,,1106	P212121	hcp/hexagonal closest packing; 12/3/h1
VIBQUU	C21 H18 N2 O2 S2/Omega=2.40%(Set #9)	N-(2-(1,2,3,4-Tetrahydrocyclopenta[b]indol-3-yl)phenyl)thiophene-2-sulfonamide.	B.Prasad,B.Yogi Sreenivas,G.Rama Krishna,R.Kapavarapu,Manojit Pal	CHEM.COMMUN.,2013,49,,6716	P-1	hcp/hexagonal closest packing; 12/3/h1
WECKEW	C16 H19 N1 O5 S1/Omega=3.39%(Set #10)	N-(1-(5-Ethynyl-4-methyl-2-oxo-1,3-dioxolan-4-yl)propyl)-4-methylbenzenesulfonamide.	A.Kulshrestha,N.S.Marzijarani,K.D.Ashtekar,R.Staples,B.Borhan	Org.Lett.,2012,14,,3592	P-1	12T15
YAZHOY	C14 H21 N3 O4 S1/Omega=4.67%(Set #6)	(S)-2-(2-acetamidophenylsulfonamido)-N,3-dimethylbutanamide.	K.N.Vijayadas,H.C.Davis,A.S.Kotmale,R.L.Gawade,V.G.Puranik,P.R.Rajamohanan,G.J.Sanjayan	CHEM.COMMUN.,2012,48,,9747	P21	12T11
YEBFUI	C7 H6 N2 O2 S1/Omega=1.42%(Set #5)	4-Cyanobenzenesulfonamide.	G.E.Cami,M.E.C.Villalba,P.Colinas,G.A.Echeverria,G.Estiu,D.B.Soria	J.MOL.STRUCT.,2012,1024,,110	Pnma	fcu/cubic closest packing; 12/3/c1; sqc19
YEKDUP	C20 H20 F3 N3 O5 S1/Omega=0.87%(Set #17)	N-(4-(4-Cyano-3-(trifluoromethyl)phenyl)-1,7-dimethyl-3,5-dioxo-10-oxa-4-azatricyclo[5.2.1.0^2,6^]dec-8-yl)ethanesulfonamide.	R.M.Attar,M.Jure-Kunkel,A.Balog,M.E.Cvijic,J.Dell-John,C.A.Rizzo,L.Schweizer,T.E.Spires,J.S.Platero,M.Obermeier,W.Shan,M.E.Salvati,W.R.Foster,J.Dinchuk,Shen-Jue Chen,G.Vite,R.Kramer,M.M.Gottardis	Cancer Res.,2009,69,,6522	P21	12,12T9
YEKDUP	C20 H20 F3 N3 O5 S1/Omega=2.10%(Set #16)	N-(4-(4-Cyano-3-(trifluoromethyl)phenyl)-1,7-dimethyl-3,5-dioxo-10-oxa-4-azatricyclo[5.2.1.0^2,6^]dec-8-yl)ethanesulfonamide.	R.M.Attar,M.Jure-Kunkel,A.Balog,M.E.Cvijic,J.Dell-John,C.A.Rizzo,L.Schweizer,T.E.Spires,J.S.Platero,M.Obermeier,W.Shan,M.E.Salvati,W.R.Foster,J.Dinchuk,Shen-Jue Chen,G.Vite,R.Kramer,M.M.Gottardis	Cancer Res.,2009,69,,6522	P21	12,12T9
YEZBIQ	C21 H26 N2 O4 S3/Omega=1.57%(Set #20)	N-(1-Cyclohexylprop-2-en-1-yl)-N-(((phenylsulfonyl)amino)sulfanyl)benzenesulfonamide.	Hongli Bao,U.K.Tambar	J.AM.CHEM.SOC.,2012,134,,18495	P1	fcu/cubic closest packing; 12/3/c1; sqc19
YUCCIJ03	C14 H11 Cl1 N2 O4 S1/Omega=2.82%(Set #6)	2-Chloro-5-(1-hydroxy-3-oxo-2,3-dihydro-1H-isoindol-1-yl)benzenesulfonamide.	F.T.Martins,Rudy Bonfilio,I.M.L.Rosa,L.M.Santos,O.M.M.Santos,M.B.Araujo,A.C.Doriguetto	CRYSTENGCOMM,2013,15,,3767	P21	fcu/cubic closest packing; 12/3/c1; sqc19
ZEBYAI	C5 H6 N2 O2 S1/Omega=4.84%(Set #8)	Pyridine-2-sulfonamide.	K.Akiri,S.Cherukuvada,S.Rana,A.Nangia	CRYST.GROWTH DES.,2012,12,,4567	P21/c	hcp/hexagonal closest packing; 12/3/h1
ANOFIT	C21 H20 Cl1 N1 O2 S1/Omega=1.96%(Set #19)	N-(1-(4-Chlorophenyl)-1-phenylethyl)-4-methylbenzenesulfonamide.	R.Shintani,M.Takeda,T.Tsuji,T.Hayashi	J.AM.CHEM.SOC.,2010,132,,13168	P21	fcu/cubic closest packing; 12/3/c1; sqc19
ANOFIT	C21 H20 Cl1 N1 O2 S1/Omega=2.43%(Set #18)	N-(1-(4-Chlorophenyl)-1-phenylethyl)-4-methylbenzenesulfonamide.	R.Shintani,M.Takeda,T.Tsuji,T.Hayashi	J.AM.CHEM.SOC.,2010,132,,13168	P21	fcu/cubic closest packing; 12/3/c1; sqc19
ATEHAJ	C29 H23 Cl1 I1 N1 O3 S1/Omega=3.04%(Set #22)	N-(3-(4-Chlorophenyl)-2-iodo-6-methoxy-1-phenyl-1H-inden-1-yl)-4-methylbenzenesulfonamide.	Yuanxun Zhu,Guangwei Yin,Deng Hong,Ping Lu,Yanguang Wang	Org.Lett.,2011,13,,1024	P-1	12,12T10
ATOVIO	C14 H17 N1 O2 S1/Omega=3.43%(Set #20)	N-((1S,3S,6R)-(Tricyclo(2.2.1.0^2,6^)hept-3-yl))-4-methylbenzenesulfonamide.	P.Muller,D.Riegert,G.Bernardinelli	HELV.CHIM.ACTA,2004,87,,227	P21	hcp/hexagonal closest packing; 12/3/h1
AYOSUD	C15 H21 N1 O5 S1/Omega=4.18%(Set #22)	4-((4-Methoxybenzenesulfonamido)methyl)cyclohexane-1-carboxylic acid.	M.Ashfaq,S.Iram,M.Akkurt,I.U.Khan,G.Mustafa,M.Danish	ACTA CRYSTALLOGR.,SECT.E:STRUCT.REP.ONLINE,2011,67,,o2248	P-1	12T98
AZESEE	C13 H12 Cl1 N1 O2 S1/Omega=2.24%(Set #17)	N-(4-methylphenyl)-3-chlorobenzenesulfonamide.	P.Sanphui,B.Sarma,A.Nangia	CRYST.GROWTH DES.,2010,10,,4550	P21/c	12,12T11
AZUQUI	C13 H14 N2 O2 S1/Omega=3.07%(Set #18)	N-(4-Aminophenyl)-4-methylbenzenesulfonamide.	J.Rehman,Ejaz,I.U.Khan,W.T.A.Harrison	ACTA CRYSTALLOGR.,SECT.E:STRUCT.REP.ONLINE,2011,67,,o2709	P212121	fcu/cubic closest packing; 12/3/c1; sqc19
BEDMIG	C10 H13 Cl1 N2 O3 S1/Omega=1.89%(Set #6)	4-Chloro-N-((propylamino)-carbonyl)-benzenesulfonamide.	C.H.Koo,S.I.Cho,Y.H.Yeon	Arch.Pharm.Res.,1980,3,,37	P212121	fcu/cubic closest packing; 12/3/c1; sqc19
BEDMIG11	C10 H13 Cl1 N2 O3 S1/Omega=3.01%(Set #25)	4-chloro-N-(propylaminocarbonyl)benzenesulfonamide.	T.N.Drebushchak,V.A.Drebushchak,E.V.Boldyreva	ACTA CRYSTALLOGR.,SECT.B:STRUCT.SCI.,2011,67,,163	P2/c	12,12T12
BEDMIG11	C10 H13 Cl1 N2 O3 S1/Omega=3.22%(Set #24)	4-chloro-N-(propylaminocarbonyl)benzenesulfonamide.	T.N.Drebushchak,V.A.Drebushchak,E.V.Boldyreva	ACTA CRYSTALLOGR.,SECT.B:STRUCT.SCI.,2011,67,,163	P2/c	12,12T12
BEWKUJ13	C11 H11 N3 O2 S1/Omega=2.76%(Set #21)	4-Amino-N-2-pyridinyl-benzenesulfonamide.	I.Bar,J.Bernstein	J.Pharm.Sci.,1985,74,,255	Pbca	12,12T13
BEWKUJ13	C11 H11 N3 O2 S1/Omega=2.95%(Set #20)	4-Amino-N-2-pyridinyl-benzenesulfonamide.	I.Bar,J.Bernstein	J.Pharm.Sci.,1985,74,,255	Pbca	12,12T13
CAZFEP	C18 H22 N2 O4 S3/Omega=2.14%(Set #19)	N,N'-Tetrahydrothiene-3,4-diyl-bis(4-methylbenzenesulfonamide).	D.Sureshkumar,S.M.Koutha,S.Chandrasekaran	J.AM.CHEM.SOC.,2005,127,,12760	P21	hcp/hexagonal closest packing; 12/3/h1
CAZFEP	C18 H22 N2 O4 S3/Omega=2.53%(Set #18)	N,N'-Tetrahydrothiene-3,4-diyl-bis(4-methylbenzenesulfonamide).	D.Sureshkumar,S.M.Koutha,S.Chandrasekaran	J.AM.CHEM.SOC.,2005,127,,12760	P21	hcp/hexagonal closest packing; 12/3/h1
DAFKAY	C20 H32 N2 O4 S2/Omega=1.79%(Set #19)	N-(2-Hydroxy-3-(N-methyl-S-phenylsulfonimidoyl)octahydro-1H-inden-1-yl)-2-methylpropane-2-sulfonamide.	S.Acikalin,G.Raabe,J.Runsink,H.-J.Gais	EUR.J.ORG.CHEM.,2011,,,5991	P21	bcu-x/ 14-conn;I m -3 m->I 41/a c d (2a,2b,2c; 1/2,1/2,1/2);Bond sets: 1,2,3,5,6:bcu-x
DAFKAY	C20 H32 N2 O4 S2/Omega=2.32%(Set #18)	N-(2-Hydroxy-3-(N-methyl-S-phenylsulfonimidoyl)octahydro-1H-inden-1-yl)-2-methylpropane-2-sulfonamide.	S.Acikalin,G.Raabe,J.Runsink,H.-J.Gais	EUR.J.ORG.CHEM.,2011,,,5991	P21	bcu-x/ 14-conn;I m -3 m->I 41/a c d (2a,2b,2c; 1/2,1/2,1/2);Bond sets: 1,2,3,5,6:bcu-x
DAFKEC	C19 H30 N2 O4 S2/Omega=1.60%(Set #19)	N-(2-Hydroxy-3-(N-methyl-S-phenylsulfonimidoyl)octahydropentalen-1-yl)-2-methylpropane-2-sulfonamide.	S.Acikalin,G.Raabe,J.Runsink,H.-J.Gais	EUR.J.ORG.CHEM.,2011,,,5991	P21	bcu-x/ 14-conn;I m -3 m->I 41/a c d (2a,2b,2c; 1/2,1/2,1/2);Bond sets: 1,2,3,5,6:bcu-x
DAFKEC	C19 H30 N2 O4 S2/Omega=2.22%(Set #18)	N-(2-Hydroxy-3-(N-methyl-S-phenylsulfonimidoyl)octahydropentalen-1-yl)-2-methylpropane-2-sulfonamide.	S.Acikalin,G.Raabe,J.Runsink,H.-J.Gais	EUR.J.ORG.CHEM.,2011,,,5991	P21	bcu-x/ 14-conn;I m -3 m->I 41/a c d (2a,2b,2c; 1/2,1/2,1/2);Bond sets: 1,2,3,5,6:bcu-x
DUPFOK	C13 H19 N1 O3 S1/Omega=0.92%(Set #21)	cis-N-(2-Hydroxycyclohexyl)-p-toluenesulfonamide.	M.I.Fadlalla,H.B.Friedrich,G.E.M.Maguire,M.D.Bala	ACTA CRYSTALLOGR.,SECT.E:STRUCT.REP.ONLINE,2010,66,,o463	P-1	fcu/cubic closest packing; 12/3/c1; sqc19
DUPFOK	C13 H19 N1 O3 S1/Omega=2.44%(Set #20)	cis-N-(2-Hydroxycyclohexyl)-p-toluenesulfonamide.	M.I.Fadlalla,H.B.Friedrich,G.E.M.Maguire,M.D.Bala	ACTA CRYSTALLOGR.,SECT.E:STRUCT.REP.ONLINE,2010,66,,o463	P-1	fcu/cubic closest packing; 12/3/c1; sqc19
EGUZEM	C14 H15 N1 O2 S1/Omega=3.29%(Set #19)	2,4-Dimethyl-N-phenylbenzenesulfonamide.	B.T.Gowda,S.Foro,P.G.Nirmala,K.S.Babitha,H.Fuess	ACTA CRYSTALLOGR.,SECT.E:STRUCT.REP.ONLINE,2009,65,,o576	Pca21	12,12T14
EGUZEM	C14 H15 N1 O2 S1/Omega=3.79%(Set #18)	2,4-Dimethyl-N-phenylbenzenesulfonamide.	B.T.Gowda,S.Foro,P.G.Nirmala,K.S.Babitha,H.Fuess	ACTA CRYSTALLOGR.,SECT.E:STRUCT.REP.ONLINE,2009,65,,o576	Pca21	12,12T14
ETOMUV	C12 H11 N1 O3 S1/Omega=2.83%(Set #45)	2-Phenoxybenzenesulfonamide.	C.Glidewell,J.N.Low,J.M.S.Skakle,J.L.Wardell	ACTA CRYSTALLOGR.,SECT.C:CRYST.STRUCT.COMMUN.,2004,60,,o364	P-1	12T99
FALGOP	C12 H21 N1 O6 S2/Omega=3.74%(Set #20)	anti-6-Methanesulfonamido-3-methyl-2-oxa-1-adamantyl methanesulfonate.	P.Camps,E.Gomez,D.Munoz-Torrero,M.Font-Bardia,X.Solans	TETRAHEDRON,2003,59,,4143	Cc	12,12T15
FAVHEP	C15 H24 N2 O2 S1/Omega=2.43%(Set #22)	N-(2-Aminocyclohexyl)-2,4,6-trimethylbenzenesulfonamide.	J.Balsells,L.Mejorado,M.Phillips,F.Ortega,G.Aguirre,R.Somanathan,P.J.Walsh	TETRAHEDRON:ASYMM.,1998,9,,4135	P-1	bcu-x/ 14-conn;I m -3 m->P 21/c (1/2a+1/2b+1/2c,2a-2b,-c; 1/2,0,1/2);Bond sets: 1,2,4,5,7,8,9:bcu-x
FEYPAB01	C13 H14 N2 O2 S1/Omega=2.66%(Set #22)	4-Methyl-N-(4-methyl-1H-pyridin-2-ylidene)benzenesulfonamide.	T.A.Mayer,M.B.Hursthouse,T.L.Threlfall,S.J.Coles	University of Southampton, Crystal Structure Report Archive,2000,,,	P21/n	12,12T16
FUZRIC	C17 H25 N1 O3 S1/Omega=2.35%(Set #20)	N-Benzyl-1-(2-hydroxy-7,7-dimethylbicyclo[2.2.1]hept-1-yl)methanesulfonamide.	A.Kozakiewicz,M.Ullrich,M.Weniak,A.Wojtczak	J.Mol.Catal.A:Chem.,2010,326,,128	P212121	12T37
GARMOC	C26 H36 I2 N2 O12 S2/Omega=3.60%(Set #19)	catena-((\m~2~-N-(1-methoxycarbonyl-3-methylbutyl)-2-iodylbenzenesulfonamide)(N-(1-methoxycarbonyl-3-methylbutyl)-2-iodylbenzenesulfonamide)).	A.Y.Koposov,V.N.Nemykin,V.V.Zhdankin	New J.Chem.,2005,29,,998	P21	fcu/cubic closest packing; 12/3/c1; sqc19
GARMOC	C26 H36 I2 N2 O12 S2/Omega=3.69%(Set #18)	catena-((\m~2~-N-(1-methoxycarbonyl-3-methylbutyl)-2-iodylbenzenesulfonamide)(N-(1-methoxycarbonyl-3-methylbutyl)-2-iodylbenzenesulfonamide)).	A.Y.Koposov,V.N.Nemykin,V.V.Zhdankin	New J.Chem.,2005,29,,998	P21	fcu/cubic closest packing; 12/3/c1; sqc19
HIVFIC	C33 H39 B1 N2 O2 S1/Omega=2.90%(Set #22)	5-(Dimethylamino)-N-(3-(dimesitylboryl)prop-2-enyl)naphthalene-1-sulfonamide.	Wai-Yeung Wong,Suk-Yue Poon,Mei-Fang Lin,Wai-Kwok Wong	AUST.J.CHEM.,2007,60,,915	P-1	12T100
KENDOX	C20 H18 N2 O5 S1/Omega=1.66%(Set #23)	N-((E)-3-(2-Furyl)-2-nitro-1-phenylprop-2-enyl)-4-methylbenzenesulfonamide.	N.Rastogi,R.Mohan,D.Panda,S.M.Mobin,I.N.N.Namboothiri	ORG.BIOMOL.CHEM.,2006,4,,3211	P-1	12,12T17
KENDOX	C20 H18 N2 O5 S1/Omega=1.79%(Set #22)	N-((E)-3-(2-Furyl)-2-nitro-1-phenylprop-2-enyl)-4-methylbenzenesulfonamide.	N.Rastogi,R.Mohan,D.Panda,S.M.Mobin,I.N.N.Namboothiri	ORG.BIOMOL.CHEM.,2006,4,,3211	P-1	12,12T17
KITRAH	C23 H20 N2 O2 S1/Omega=2.65%(Set #23)	4-Methyl-N-(4-methyl-3-phenylquinolin-2(1H)-ylidene)benzenesulfonamide.	Sun-Liang Cui,Jing Wang,Yan-Guang Wang	TETRAHEDRON,2008,64,,487	P-1	12T15
KIZCIG	C22 H21 Br1 N2 O2 S1/Omega=2.24%(Set #19)	(R)-N-((4-bromophenyl)(4,7-dihydro-1H-indol-2-yl)methyl)-4-methylbenzenesulfonamide.	Qiang Kang,Xiao-Jian Zheng,Shu-Li You	Chem.-Eur.J.,2008,14,,3539	P21	hcp/hexagonal closest packing; 12/3/h1
KIZCIG	C22 H21 Br1 N2 O2 S1/Omega=3.12%(Set #18)	(R)-N-((4-bromophenyl)(4,7-dihydro-1H-indol-2-yl)methyl)-4-methylbenzenesulfonamide.	Qiang Kang,Xiao-Jian Zheng,Shu-Li You	Chem.-Eur.J.,2008,14,,3539	P21	hcp/hexagonal closest packing; 12/3/h1
KUSRIA	C13 H10 Cl1 N1 O3 S1/Omega=3.98%(Set #19)	N-Benzoyl-4-chlorobenzenesulfonamide.	P.A.Suchetan,B.T.Gowda,S.Foro,H.Fuess	ACTA CRYSTALLOGR.,SECT.E:STRUCT.REP.ONLINE,2010,66,,o766	P-1	12,12T18
MOYSOJ01	C31 H32 N4 O5 S2/Omega=1.52%(Set #20)	N,N'-((2-Hydroxypropane-1,3-diyl)bis(nitrilomethylylidene-2,1-phenylene))bis(4-methylbenzenesulfonamide).	M.V.Lopez,M.R.Bermejo,M.E.Vazquez,A.Taglietti,G.Zaragoza,R.Pedrido,M.Martinez-Calvo	ORG.BIOMOL.CHEM.,2010,8,,357	I2	12T101
MUDCEU	C27 H27 Br1 N2 O6 S1 Si1/Omega=2.63%(Set #21)	N-((2-Bromophenyl)(3-(dimethyl(phenyl)silyl)-2-ethyl-5-oxo-2,5-dihydrofuran-2-yl)methyl)-4-nitrobenzenesulfonamide.	R.A.Brawn,J.S.Panek	Org.Lett.,2009,11,,4362	P21/n	12,12T19
MUDCEU	C27 H27 Br1 N2 O6 S1 Si1/Omega=3.53%(Set #20)	N-((2-Bromophenyl)(3-(dimethyl(phenyl)silyl)-2-ethyl-5-oxo-2,5-dihydrofuran-2-yl)methyl)-4-nitrobenzenesulfonamide.	R.A.Brawn,J.S.Panek	Org.Lett.,2009,11,,4362	P21/n	12,12T19
NEBZEA	C16 H18 N4 O3 S1/Omega=4.11%(Set #20)	N-(Amino(3-benzylureido)methylene)-4-methylbenzenesulfonamide.	P.Prabhakaran,V.G.Puranik,G.J.Sanjayan	J.ORG.CHEM.,2005,70,,10067	Cc	fcu/cubic closest packing; 12/3/c1; sqc19
NUPMER	C16 H19 N1 O2 S1/Omega=1.55%(Set #23)	N-(2,3-Dimethylphenyl)-2,4-dimethylbenzenesulfonamide.	P.G.Nirmala,B.T.Gowda,S.Foro,H.Fuess	ACTA CRYSTALLOGR.,SECT.E:STRUCT.REP.ONLINE,2010,66,,o1017	P-1	12,12T17
NUPMER	C16 H19 N1 O2 S1/Omega=1.57%(Set #22)	N-(2,3-Dimethylphenyl)-2,4-dimethylbenzenesulfonamide.	P.G.Nirmala,B.T.Gowda,S.Foro,H.Fuess	ACTA CRYSTALLOGR.,SECT.E:STRUCT.REP.ONLINE,2010,66,,o1017	P-1	12,12T17
NUQBUX	C26 H23 N2 O3 P1 S1/Omega=2.91%(Set #21)	4-Acetamido-N-(\l^5^-triphenylphosphoranylidene)benzenesulfonamide.	B.Prugovecki,M.Marinkovic,M.Vinkovic,M.Dumic	ACTA CRYSTALLOGR.,SECT.E:STRUCT.REP.ONLINE,2010,66,,o1098	P21/n	12,12T20
OPEHOH	C16 H16 N2 O4 S2/Omega=1.91%(Set #13)	N,N'-Dimethylanthracene-1,8-disulfonamide.	Zhi-Qiang Hu,Xu-Dong Yang,Cun-Li Cui,Lei Ding,Cun-Sheng Lin,Hai-Yan Lu,Lei Wang	Sens.Actuators,B,2010,145,,61	P-421c	12,12T21
PEGXIJ	C22 H19 Br1 N2 O2 S1/Omega=2.20%(Set #19)	(S)-N-((4-Bromophenyl)(indol-3-yl)methyl)-4-methylbenzenesulfonamide.	Yi-Xia Jia,Jian-Hua Xie,Hai-Feng Duan,Li-Xin Wang,Qi-Lin Zhou	Org.Lett.,2006,8,,1621	C2	12T58
PEGXIJ	C22 H19 Br1 N2 O2 S1/Omega=2.49%(Set #18)	(S)-N-((4-Bromophenyl)(indol-3-yl)methyl)-4-methylbenzenesulfonamide.	Yi-Xia Jia,Jian-Hua Xie,Hai-Feng Duan,Li-Xin Wang,Qi-Lin Zhou	Org.Lett.,2006,8,,1621	C2	12T58
PEMWEK	C16 H15 Br1 Cl1 N5 O3 S1/Omega=3.41%(Set #19)	3-((((2-Bromophenyl)amino)(cyanoamino)methylidene)amino)-6-chloro-2-hydroxy-N, N-dimethylbenzenesulfonamide.	Hong Nie,K.L.Widdowson,M.R.Palovich,Wei Fu,J.D.Elliott,D.L.Bryan,M.Burman,D.B.Schmidt,J.J.Foley,H.M.Sarau,J.Busch-Petersen	BIOORG.MED.CHEM.LETT.,2006,16,,5513	Pca21	12,12T22
PEMWEK	C16 H15 Br1 Cl1 N5 O3 S1/Omega=3.58%(Set #18)	3-((((2-Bromophenyl)amino)(cyanoamino)methylidene)amino)-6-chloro-2-hydroxy-N, N-dimethylbenzenesulfonamide.	Hong Nie,K.L.Widdowson,M.R.Palovich,Wei Fu,J.D.Elliott,D.L.Bryan,M.Burman,D.B.Schmidt,J.J.Foley,H.M.Sarau,J.Busch-Petersen	BIOORG.MED.CHEM.LETT.,2006,16,,5513	Pca21	12,12T22
PODQEF	C15 H16 N2 O3 S1/Omega=3.31%(Set #22)	2-((2,6-Dimethylphenyl)carbamoyl)benzenesulfonamide.	W.A.Siddiqui,S.Ahmad,H.L.Siddiqui,M.Parvez	ACTA CRYSTALLOGR.,SECT.C:CRYST.STRUCT.COMMUN.,2008,64,,o367	P-1	12,12T23
POPJUA	C17 H15 N3 O4 S1/Omega=3.39%(Set #22)	4-((2-Hydroxybenzylidene)amino)-N-(5-methyl-3-isoxazolyl)benzenesulfonamide.	A.Subashini,M.Hemamalini,P.T.Muthiah,G.Bocelli,A.Cantoni	J.Chem.Cryst.,2009,39,,112	P-1	bcu-x/ 14-conn;I m -3 m->P 21/c (1/2a+1/2b+1/2c,2a-2b,-c; 1/2,0,1/2);Bond sets: 1,2,4,5,7,8,9:bcu-x
QAJYOR	C4 H13 N1 O2 S1 Si1/Omega=1.29%(Set #19)	N-(Trimethylsilyl)methanesulfonamide.	A.R.McWilliams,S.Gezahegna,A.J.Lough	ACTA CRYSTALLOGR.,SECT.E:STRUCT.REP.ONLINE,2011,67,,o93	P21	hcp/hexagonal closest packing; 12/3/h1
QAJYOR	C4 H13 N1 O2 S1 Si1/Omega=5.53%(Set #18)	N-(Trimethylsilyl)methanesulfonamide.	A.R.McWilliams,S.Gezahegna,A.J.Lough	ACTA CRYSTALLOGR.,SECT.E:STRUCT.REP.ONLINE,2011,67,,o93	P21	hcp/hexagonal closest packing; 12/3/h1
QASNIJ	C38 H36 N1 O4 P1 S1/Omega=2.71%(Set #20)	4-Butyl-N-((2,2'-dimethoxy-1,1'-binaphthalen-3-yl)(phenyl)phosphino)benzenesulfonamide.	F.W.Patureau,M.A.Siegler,A.L.Spek,A.J.Sandee,S.Juge,S.Aziz,A.Berkessel,J.N.H.Reek	EUR.J.INORG.CHEM.,2012,,,496	P1	12T15
QISQOZ	C7 H8 Cl1 N1 O2 S1/Omega=3.45%(Set #45)	2-Methyl-4-chloro-benzenesulfonamide.	B.T.Gowda,Srilatha,S.Foro,J.Kozisek,H.Fuess	Z.NATURFORSCH.,A:PHYS.SCI.,2007,62,,417	P1	bcu-x/ 14-conn;I m -3 m->C 2/c (a+3b,c,a-b; 3/4,3/4,1/4);Bond sets: 1,2,3,5,6,7,8,10:bcu-x
QISQOZ	C7 H8 Cl1 N1 O2 S1/Omega=4.48%(Set #44)	2-Methyl-4-chloro-benzenesulfonamide.	B.T.Gowda,Srilatha,S.Foro,J.Kozisek,H.Fuess	Z.NATURFORSCH.,A:PHYS.SCI.,2007,62,,417	P1	bcu-x/ 14-conn;I m -3 m->C 2/c (a+3b,c,a-b; 3/4,3/4,1/4);Bond sets: 1,2,3,5,6,7,8,10:bcu-x
QOMZOI	C17 H25 N1 O2 S1/Omega=4.04%(Set #19)	N-((1R,2S,3R)-2-Allyl-3-methylcyclohexyl)-4-toluenesulfonamide.	E.W.Dijk,L.Panella,P.Pinho,R.Naasz,A.Meetsma,A.J.Minnaard,B.L.Feringa	TETRAHEDRON,2004,60,,9687	P21	12,12T24
QOMZOI	C17 H25 N1 O2 S1/Omega=4.19%(Set #18)	N-((1R,2S,3R)-2-Allyl-3-methylcyclohexyl)-4-toluenesulfonamide.	E.W.Dijk,L.Panella,P.Pinho,R.Naasz,A.Meetsma,A.J.Minnaard,B.L.Feringa	TETRAHEDRON,2004,60,,9687	P21	12,12T24
RAXXOF	C24 H27 N1 O5 S1/Omega=1.73%(Set #19)	N-((3,5-Dimethylphenyl)(2-hydroxy-4,6-dimethoxyphenyl)methyl)-4-methylbenzenesulfonamide.	Guo-Xing Li,Jin Qu	CHEM.COMMUN.,2012,48,,5518	P21	12,12T25
RAXXOF	C24 H27 N1 O5 S1/Omega=1.81%(Set #18)	N-((3,5-Dimethylphenyl)(2-hydroxy-4,6-dimethoxyphenyl)methyl)-4-methylbenzenesulfonamide.	Guo-Xing Li,Jin Qu	CHEM.COMMUN.,2012,48,,5518	P21	12,12T25
REKLID	C23 H19 F3 N2 O2 S1/Omega=2.82%(Set #19)	(-)-(S)-N-(\a-(3-Indolyl)-4-trifluoromethylbenzyl)-p-toluenesulfonamide.	Yong-Qiang Wang,Jun Song,Ran Hong,Hongming Li,Li Deng	J.AM.CHEM.SOC.,2006,128,,8156	C2	12T58
REKLID	C23 H19 F3 N2 O2 S1/Omega=2.90%(Set #18)	(-)-(S)-N-(\a-(3-Indolyl)-4-trifluoromethylbenzyl)-p-toluenesulfonamide.	Yong-Qiang Wang,Jun Song,Ran Hong,Hongming Li,Li Deng	J.AM.CHEM.SOC.,2006,128,,8156	C2	12T58
REMBUH	C28 H21 N3 O4 S1/Omega=2.35%(Set #21)	N-2-(6,11-dioxonaphthalene-5H-benzo[b]carbazole)-5-dimethylaminonaphthalenesulfonamide.	R.A.Illos,D.Shamir,L.J.W.Shimon,I.Zilbermann,S.Bittner	TETRAHEDRON LETT.,2006,47,,5543	Pca21	12,12T26
REMBUH	C28 H21 N3 O4 S1/Omega=2.99%(Set #20)	N-2-(6,11-dioxonaphthalene-5H-benzo[b]carbazole)-5-dimethylaminonaphthalenesulfonamide.	R.A.Illos,D.Shamir,L.J.W.Shimon,I.Zilbermann,S.Bittner	TETRAHEDRON LETT.,2006,47,,5543	Pca21	12,12T26
SLFNMA02	C11 H12 N4 O2 S1/Omega=1.59%(Set #19)	4-Amino-N-(4-methyl-2-pyrimidinyl)benzenesulfonamide.	M.R.Caira,R.Mohamed	ACTA CRYSTALLOGR.,SECT.B:STRUCT.SCI.,1992,48,,492	Pn21a	12,12T5
SLFNMA02	C11 H12 N4 O2 S1/Omega=2.26%(Set #18)	4-Amino-N-(4-methyl-2-pyrimidinyl)benzenesulfonamide.	M.R.Caira,R.Mohamed	ACTA CRYSTALLOGR.,SECT.B:STRUCT.SCI.,1992,48,,492	Pn21a	12,12T5
SOLRER	C13 H12 Cl1 N1 O2 S1/Omega=3.52%(Set #24)	4-Chloro-2-methyl-N-phenylbenzenesulfonamide.	B.T.Gowda,S.Foro,P.G.Nirmala,K.S.Babitha,H.Fuess	ACTA CRYSTALLOGR.,SECT.E:STRUCT.REP.ONLINE,2009,65,,o476	P-1	12,12T27
SUTHAZ05	C9 H9 N3 O2 S2/Omega=3.57%(Set #23)	4-Amino-N-thiazol-2-ylidene-benzenesulfonamide.	D.S.Hughes,M.B.Hursthouse,T.Threlfall,S.Tavener	ACTA CRYSTALLOGR.,SECT.C:CRYST.STRUCT.COMMUN.,1999,55,,1831	P21/n	bcu-x/ 14-conn;I m -3 m->I -4 2 d (a-b,a+b,2c; 1/2,0,1/4);Bond sets: 1,2,4,5:bcu-x
SUTHAZ05	C9 H9 N3 O2 S2/Omega=4.28%(Set #22)	4-Amino-N-thiazol-2-ylidene-benzenesulfonamide.	D.S.Hughes,M.B.Hursthouse,T.Threlfall,S.Tavener	ACTA CRYSTALLOGR.,SECT.C:CRYST.STRUCT.COMMUN.,1999,55,,1831	P21/n	bcu-x/ 14-conn;I m -3 m->I -4 2 d (a-b,a+b,2c; 1/2,0,1/4);Bond sets: 1,2,4,5:bcu-x
SUTHAZ06	C9 H9 N3 O2 S2/Omega=3.00%(Set #23)	4-Amino-N-(2,3-dihydro-2-thiazolylidene)benzenesulfonamide.	Fung Choy Chan,J.Anwar,R.Cernik,P.Barnes,R.McHardy Wilson	J.APPL.CRYSTALLOGR.,1999,32,,436	P21/n	12,12T28
SUTHAZ06	C9 H9 N3 O2 S2/Omega=3.69%(Set #22)	4-Amino-N-(2,3-dihydro-2-thiazolylidene)benzenesulfonamide.	Fung Choy Chan,J.Anwar,R.Cernik,P.Barnes,R.McHardy Wilson	J.APPL.CRYSTALLOGR.,1999,32,,436	P21/n	12,12T28
SUTHAZ07	C9 H9 N3 O2 S2/Omega=3.17%(Set #21)	4-Amino-N-(2-thiazolyl)benzenesulfonamide.	T.N.Drebushchak,E.V.Boldyreva,M.A.Mikhailenko	Zh.Strukt.Khim.(Russ.)(J.Struct.Chem.),2008,49,,90	P21/c	12,12T29
SUTHAZ07	C9 H9 N3 O2 S2/Omega=4.10%(Set #20)	4-Amino-N-(2-thiazolyl)benzenesulfonamide.	T.N.Drebushchak,E.V.Boldyreva,M.A.Mikhailenko	Zh.Strukt.Khim.(Russ.)(J.Struct.Chem.),2008,49,,90	P21/c	12,12T29
SUTHAZ11	C9 H9 N3 O2 S2/Omega=1.65%(Set #20)	4-Amino-N-(2-thiazolyl)benzenesulfonamide.	T.N.Drebushchak,E.V.Boldyreva,M.A.Mikhailenko	Zh.Strukt.Khim.(Russ.)(J.Struct.Chem.),2008,49,,90	P21/a	12,12T30
SUTHAZ11	C9 H9 N3 O2 S2/Omega=2.06%(Set #19)	4-Amino-N-(2-thiazolyl)benzenesulfonamide.	T.N.Drebushchak,E.V.Boldyreva,M.A.Mikhailenko	Zh.Strukt.Khim.(Russ.)(J.Struct.Chem.),2008,49,,90	P21/a	12,12T30
SUTHAZ12	C9 H9 N3 O2 S2/Omega=1.18%(Set #20)	4-Amino-N-(2-thiazolyl)benzenesulfonamide.	T.N.Drebushchak,E.V.Boldyreva,M.A.Mikhailenko	Zh.Strukt.Khim.(Russ.)(J.Struct.Chem.),2008,49,,90	P21/a	12,12T30
SUTHAZ12	C9 H9 N3 O2 S2/Omega=2.00%(Set #19)	4-Amino-N-(2-thiazolyl)benzenesulfonamide.	T.N.Drebushchak,E.V.Boldyreva,M.A.Mikhailenko	Zh.Strukt.Khim.(Russ.)(J.Struct.Chem.),2008,49,,90	P21/a	12,12T30
SUTHAZ16	C9 H9 N3 O2 S2/Omega=3.33%(Set #21)	4-Amino-N-(thiazol-2-ylidene)benzenesulfonamide.	T.Gelbrich,D.S.Hughes,M.B.Hursthouse,T.L.Threlfall	CRYSTENGCOMM,2008,10,,1328	P21/c	12,12T29
SUTHAZ16	C9 H9 N3 O2 S2/Omega=3.89%(Set #20)	4-Amino-N-(thiazol-2-ylidene)benzenesulfonamide.	T.Gelbrich,D.S.Hughes,M.B.Hursthouse,T.L.Threlfall	CRYSTENGCOMM,2008,10,,1328	P21/c	12,12T29
SUTHAZ17	C9 H9 N3 O2 S2/Omega=1.64%(Set #20)	4-Amino-N-(thiazol-2-ylidene)benzenesulfonamide.	T.Gelbrich,D.S.Hughes,M.B.Hursthouse,T.L.Threlfall	CRYSTENGCOMM,2008,10,,1328	P21/c	12,12T30
SUTHAZ17	C9 H9 N3 O2 S2/Omega=2.07%(Set #19)	4-Amino-N-(thiazol-2-ylidene)benzenesulfonamide.	T.Gelbrich,D.S.Hughes,M.B.Hursthouse,T.L.Threlfall	CRYSTENGCOMM,2008,10,,1328	P21/c	12,12T30
UCUDUS	C9 H14 N2 O2 S1/Omega=3.31%(Set #20)	N-(2-Aminoethyl)-4-methylbenzenesulfonamide.	C.Squires,C.W.Baxter,J.Campbell,L.F.Lindoy,H.McNab,A.Parkin,S.Parsons,P.A.Tasker,Gang Wei,D.J.White	DALTON TRANS.,2006,,,2026	Pn	fcu/cubic closest packing; 12/3/c1; sqc19
UCUFOO	C13 H14 N2 O2 S1/Omega=1.84%(Set #19)	N-(2-Aminophenyl)-4-methylbenzenesulfonamide.	C.Squires,C.W.Baxter,J.Campbell,L.F.Lindoy,H.McNab,A.Parkin,S.Parsons,P.A.Tasker,Gang Wei,D.J.White	DALTON TRANS.,2006,,,2026	P21	12T11
UCUFOO	C13 H14 N2 O2 S1/Omega=2.81%(Set #18)	N-(2-Aminophenyl)-4-methylbenzenesulfonamide.	C.Squires,C.W.Baxter,J.Campbell,L.F.Lindoy,H.McNab,A.Parkin,S.Parsons,P.A.Tasker,Gang Wei,D.J.White	DALTON TRANS.,2006,,,2026	P21	12T11
UGETIJ	C19 H23 N1 O2 S1/Omega=2.24%(Set #23)	anti-N-(1,2-Dimethyl-1-phenylbut-3-enyl)-p-toluenesulfonamide.	C.Ogawa,M.Sugiura,S.Kobayashi	J.ORG.CHEM.,2002,67,,5359	P-1	fcu/cubic closest packing; 12/3/c1; sqc19
UGETIJ	C19 H23 N1 O2 S1/Omega=3.48%(Set #22)	anti-N-(1,2-Dimethyl-1-phenylbut-3-enyl)-p-toluenesulfonamide.	C.Ogawa,M.Sugiura,S.Kobayashi	J.ORG.CHEM.,2002,67,,5359	P-1	fcu/cubic closest packing; 12/3/c1; sqc19
UPITAP	C22 H35 N3 O6 S1 Si1/Omega=0.61%(Set #21)	N-(1-((t-Butyl(dimethyl)silyl)oxy)-3-methyl-3-(morpholin-4-yl)pent-4-yn-2-yl)-2-nitrobenzenesulfonamide.	B.T.Kelley,M.M.Joullie	Org.Lett.,2010,12,,4244	C2	12,12T31
UPITAP	C22 H35 N3 O6 S1 Si1/Omega=2.99%(Set #20)	N-(1-((t-Butyl(dimethyl)silyl)oxy)-3-methyl-3-(morpholin-4-yl)pent-4-yn-2-yl)-2-nitrobenzenesulfonamide.	B.T.Kelley,M.M.Joullie	Org.Lett.,2010,12,,4244	C2	12,12T31
UVENAL	C13 H11 N3 O2 S1/Omega=3.29%(Set #21)	4-Amino-N-(4-cyanophenyl)benzenesulfonamide.	G.L.Perlovich,A.M.Ryzhakov,V.V.Tkachev,L.Kr.Hansen	CRYST.GROWTH DES.,2011,11,,1067	C2/c	12,12T32
VUSMEC	C10 H15 N3 O2 S1/Omega=2.15%(Set #21)	4-Phenylpiperazine-1-sulfonamide.	M.Berredjem,R.Bouasla,N.-E.Aouf,C.Barbey	X-ray.Str.Anal.Online.,2010,26,,13	P21/c	12,12T33
VUSMEC	C10 H15 N3 O2 S1/Omega=2.45%(Set #20)	4-Phenylpiperazine-1-sulfonamide.	M.Berredjem,R.Bouasla,N.-E.Aouf,C.Barbey	X-ray.Str.Anal.Online.,2010,26,,13	P21/c	12,12T33
WASHEF	C19 H16 N2 O3 S2/Omega=3.37%(Set #18)	4-(2-(2-Naphthyl)-4-oxo-1,3-thiazolidin-3-yl)benzenesulfonamide.	R.Cirilli,S.Fiore,F.La Torre,E.Maccioni,D.Secci,M.L.Sanna,C.Faggi	CHIRALITY,2010,22,,56	P21	12,12T34
XAZNOD	C16 H16 N4 O2 S1/Omega=2.71%(Set #21)	2-(1H-Benzimidazol-2-yl)-N-[(E)-(dimethylamino)methylidene]benzenesulfonamide.	A.Ashraf,M.N.Tahir,W.A.Siddiqui,N.Perveen	ACTA CRYSTALLOGR.,SECT.E:STRUCT.REP.ONLINE,2012,68,,o2069	P21/n	12,12T35
XAZNOD	C16 H16 N4 O2 S1/Omega=2.92%(Set #20)	2-(1H-Benzimidazol-2-yl)-N-[(E)-(dimethylamino)methylidene]benzenesulfonamide.	A.Ashraf,M.N.Tahir,W.A.Siddiqui,N.Perveen	ACTA CRYSTALLOGR.,SECT.E:STRUCT.REP.ONLINE,2012,68,,o2069	P21/n	12,12T35
XIDNEE	C10 H6 F17 N1 O2 S1/Omega=0.27%(Set #23)	N-Ethylperfluoro-octane-1-sulfonamide.	H.-J.Lehmler,V.V.V.N.S.R.Rao,D.Nauduri,J.D.Vargo,S.Parkin	J.FLUORINE CHEM.,2007,128,,595	P-1	hcp/hexagonal closest packing; 12/3/h1
XIDNEE	C10 H6 F17 N1 O2 S1/Omega=1.42%(Set #22)	N-Ethylperfluoro-octane-1-sulfonamide.	H.-J.Lehmler,V.V.V.N.S.R.Rao,D.Nauduri,J.D.Vargo,S.Parkin	J.FLUORINE CHEM.,2007,128,,595	P-1	hcp/hexagonal closest packing; 12/3/h1
YAGDER	C24 H23 N3 O3 S2/Omega=2.76%(Set #21)	(S)-N-[1-(5-Benzylsulfanyl-1,3,4-oxadiazol-2-yl)-2-phenylethyl]-4-methylbenzenesulfonamide.	T.Syed,S.Hameed,P.G.Jones	ACTA CRYSTALLOGR.,SECT.E:STRUCT.REP.ONLINE,2011,67,,o2875	C2	12T61
YAGDER	C24 H23 N3 O3 S2/Omega=3.16%(Set #20)	(S)-N-[1-(5-Benzylsulfanyl-1,3,4-oxadiazol-2-yl)-2-phenylethyl]-4-methylbenzenesulfonamide.	T.Syed,S.Hameed,P.G.Jones	ACTA CRYSTALLOGR.,SECT.E:STRUCT.REP.ONLINE,2011,67,,o2875	C2	12T61
YAGGIY	C15 H16 Cl1 N1 O2 S1/Omega=2.55%(Set #33)	4-Chloro-N-(2,5-dimethylphenyl)-2-methylbenzenesulfonamide.	V.Z.Rodrigues,S.Foro,B.T.Gowda	ACTA CRYSTALLOGR.,SECT.E:STRUCT.REP.ONLINE,2011,67,,o2891	P-1	12,12,12T7
YARFAZ	C13 H21 N1 O4 S1/Omega=3.17%(Set #21)	N-(1,3-Dihydroxyhexan-2-yl)-p-toluenesulfonamide.	S.Baeurle,U.Koert,K.Polborn	PRIVATE COMMUNICATION,2005,,,	P21/c	12,12T36
ABAFEQ	C18 H18 Cl1 N3 O3 S2/Omega=2.11%(Set #6)	(S)-N-(1-[5-(4-Chlorobenzylsulfanyl)-1,3,4-oxadiazol-2-yl]ethyl)-4-methylbenzenesulfonamide.	T.Syed,S.Hameed,P.G.Jones	ACTA CRYSTALLOGR.,SECT.E:STRUCT.REP.ONLINE,2011,67,,o2793	P212121	hcp/hexagonal closest packing; 12/3/h1
AMAVIT	C6 H6 Cl2 N2 O4 S2/Omega=4.26%(Set #8)	4,5-Dichloro-1,3-benzenedisulfonamide.	M.Haramura,A.Tanaka,T.Akimoto,N.Hirayama	Anal.Sci.:X-Ray Struct.Anal.Online,2003,19,,x35	C2/c	bcu-x/ 14-conn;I m -3 m->I b c a (a-b,a+b,2c; 1/4,1/4,3/4);Bond sets: 2,3,4,5,6:bcu-x
AMEVAP	C15 H14 Cl1 N3 O4 S3/Omega=3.22%(Set #7)	6-Chloro-3-(((phenylmethyl)thio)methyl)-4H-1,2,4-benzthothiadiazine-7-sulfonamide-1,1-dioxide.	P.Prabakaran,B.Umadevi,P.Panneerselvam,P.T.Muthiah,G.Bocelli,L.Righi	CRYSTENGCOMM,2003,5,,487	P21/a	fcu/cubic closest packing; 12/3/c1; sqc19
AZERON	C13 H11 Cl2 N1 O2 S1/Omega=3.86%(Set #7)	N-(2,6-Dichlorophenyl)-3-methylbenzenesulfonamide.	P.Sanphui,B.Sarma,A.Nangia	CRYST.GROWTH DES.,2010,10,,4550	P21/n	hcp/hexagonal closest packing; 12/3/h1
AZURIX	C14 H13 Cl2 N1 O2 S1/Omega=2.52%(Set #8)	2,4-Dichloro-N-(3,4-dimethylphenyl)benzenesulfonamide.	V.Z.Rodrigues,S.Foro,B.T.Gowda	ACTA CRYSTALLOGR.,SECT.E:STRUCT.REP.ONLINE,2011,67,,o2712	P21/c	12T16
BCHXBS	C12 H14 Br1 N1 O2 S1/Omega=2.04%(Set #8)	N-exo-6-Bicyclo(3.1.0)hexyl p-bromosulfonamide.	M.F.Grostic,D.J.Duchamp,C.G.Chidester	J.ORG.CHEM.,1971,36,,2929	P21/c	fcu/cubic closest packing; 12/3/c1; sqc19
BUDJIU	C15 H21 Br1 N4 O6 S1/Omega=3.25%(Set #6)	N-(1-((3-Bromopropyl)aminocarbonyl)ethyl)-2-(2-nitrobenzenesulfonamido)propionamide.	R.Thirupathi,D.N.Reddy,S.Brinda,E.N.Prabhakaran	ACTA CRYSTALLOGR.,SECT.E:STRUCT.REP.ONLINE,2009,65,,o2308	P212121	bcu-x/ 14-conn;I m -3 m->C m c m (a-b,a+b,c; 1/4,1/4,1/4);Bond sets: 2,3,4,5:bcu-x
EGOXIH	C13 H14 Cl1 N3 O3 S1/Omega=2.73%(Set #7)	4-Chloro-N-(2-((1H-pyrrol-2-ylmethylene)oxylamino)ethyl)benzenesulfonamide.	H.A.Dondas,J.E.Cummins,R.Grigg,M.Thornton-Pett	TETRAHEDRON,2001,57,,7951	P21/a	12T36
GARHOY	C13 H9 Cl1 N2 O5 S1/Omega=4.22%(Set #8)	N-(2-Chlorobenzoyl)-3-nitrobenzenesulfonamide.	P.A.Suchetan,S.Foro,B.T.Gowda	ACTA CRYSTALLOGR.,SECT.E:STRUCT.REP.ONLINE,2012,68,,o543	P21/n	12T39
KIKCUD	C8 H8 Cl3 N3 O4 S2/Omega=4.21%(Set #6)	6-Chloro-3-(dichloromethyl)-3,4-dihydro-2H-1,2,4-benzothiadazine-7-sulfonamide1,1-dioxide.	P.Fernandes,C.K.Leech,A.Johnston,K.Shankland,W.I.F.David,N.Shankland,A.J.Florence	ACTA CRYSTALLOGR.,SECT.E:STRUCT.REP.ONLINE,2007,63,,o3685	P212121	hcp/hexagonal closest packing; 12/3/h1
KUTTEZ	C12 H8 Cl3 N1 O2 S1/Omega=2.57%(Set #9)	2,4-Dichloro-N-(4-chlorophenyl)benzenesulfonamide.	P.G.Nirmala,B.T.Gowda,S.Foro,H.Fuess	ACTA CRYSTALLOGR.,SECT.E:STRUCT.REP.ONLINE,2010,66,,o918	P-1	fcu/cubic closest packing; 12/3/c1; sqc19
MICKOZ	C25 H22 Br1 Cl1 N2 O4 S1/Omega=1.93%(Set #6)	(2S,3R)-Ethyl3-(5-bromo-1H-indol-3-yl)-3-(4-chlorophenyl)-2-(phenylsulfonamido)propanoate.	Yong Sui,Li Liu,Jun-Ling Zhao,Dong Wang,Yong-Jun Chen	TETRAHEDRON,2007,63,,5173	P212121	bcu-x/ 14-conn;I m -3 m->P n m a (2a,c,-b; 1/4,1/4,1/4);Bond sets: 2,3,4,5,6:bcu-x
NIQNAD	C17 H16 Br1 N3 O3 S1/Omega=2.99%(Set #6)	4-Bromo-N-(1,5-dimethyl-3-oxo-2-phenyl-2,3-dihydro-1H-pyrazol-4-yl)benzenesulfonamide.	L.E.da Silva,P.T.de Sousa Junior,E.N.Maciel,S.Foro,E.L.Dall'Oglio	ACTA CRYSTALLOGR.,SECT.E:STRUCT.REP.ONLINE,2007,63,,o4820	P212121	fcu/cubic closest packing; 12/3/c1; sqc19
NIQNEH	C17 H15 Cl2 N3 O3 S1/Omega=3.14%(Set #9)	2,5-Dichloro-N-(1,5-dimethyl-3-oxo-2-phenyl-2,3-dihydro-1H-pyrazol-4-yl)benzenesulfonamide.	L.E.da Silva,P.T.de Sousa Junior,V.C.da Silva,T.A.N.Ribeiro,S.Foro,E.L.Dall'Oglio	ACTA CRYSTALLOGR.,SECT.E:STRUCT.REP.ONLINE,2007,63,,o4821	P-1	bcu-x/ 14-conn;I m -3 m->P 21/c (1/2a+1/2b+1/2c,2a-2b,-c; 1/2,0,1/2);Bond sets: 1,2,4,5,7,8,9:bcu-x
NORFEG	C13 H11 Cl2 N1 O2 S1/Omega=3.70%(Set #9)	4-Chloro-N-(2-chlorophenyl)-2-methylbenzenesulfonamide.	B.T.Gowda,S.Foro,P.G.Nirmala,K.S.Babitha,H.Fuess	ACTA CRYSTALLOGR.,SECT.E:STRUCT.REP.ONLINE,2009,65,,o717	P-1	fcu/cubic closest packing; 12/3/c1; sqc19
OFIHIV	C18 H17 Br1 N4 O3 S2/Omega=3.45%(Set #6)	N-(5-Bromo-2-(piperidine-1-carbonyl)phenyl)benzo(1,2,5)thiadiazole-4-sulfonamide.	M.D.Rosen,M.D.Hack,B.D.Allison,V.K.Phuong,C.R.Woods,M.F.Morton,C.E.Prendergast,T.D.Barrett,C.Schubert,Lina Li,Xiaodong Wu,Jiejun Wu,J.M.Freedman,N.P.Shankley,M.H.Rabinowitz	BIOORG.MED.CHEM.,2008,16,,3917	P212121	12T5
OFIHUH	C19 H17 I1 N4 O4 S1/Omega=2.26%(Set #7)	N-(5-Iodo-2-(morpholine-4-carbonyl)phenyl)quinoxoline-5-sulfonamide.	M.D.Rosen,M.D.Hack,B.D.Allison,V.K.Phuong,C.R.Woods,M.F.Morton,C.E.Prendergast,T.D.Barrett,C.Schubert,Lina Li,Xiaodong Wu,Jiejun Wu,J.M.Freedman,N.P.Shankley,M.H.Rabinowitz	BIOORG.MED.CHEM.,2008,16,,3917	Pbca	hcp/hexagonal closest packing; 12/3/h1
OHAXAW	C29 H27 Cl2 N1 O3 S1/Omega=1.91%(Set #8)	N-((3-(4-Chlorobenzylidene)-2-oxocyclo-oct-4-enyl)(4-chlorophenyl)methyl)-4-methylbenzenesulfonamide.	Min Shi,Yong-Mei Xu,Gui-Ling Zhao,Xiao-Feng Wu	EUR.J.ORG.CHEM.,2002,,,3666	P21/c	fcu/cubic closest packing; 12/3/c1; sqc19
POXBIO	C12 H7 Cl4 N1 O2 S1/Omega=2.19%(Set #9)	2,4-Dichloro-N-(3,4-dichlorophenyl)benzenesulfonamide.	B.T.Gowda,S.Foro,P.G.Nirmala,H.Fuess	ACTA CRYSTALLOGR.,SECT.E:STRUCT.REP.ONLINE,2009,65,,o1940	P-1	fcu/cubic closest packing; 12/3/c1; sqc19
QEDHEO	C14 H13 Cl2 N1 O2 S1/Omega=2.91%(Set #7)	2,5-Dichloro-N-(2,3-dimethylphenyl)benzenesulfonamide.	S.Y.Mughal,I.U.Khan,W.T.A.Harrison,M.H.Khan,M.N.Tahir	ACTA CRYSTALLOGR.,SECT.E:STRUCT.REP.ONLINE,2012,68,,o2748	Pbca	hcp/hexagonal closest packing; 12/3/h1
QQQAUG01	C7 H6 Cl1 N3 O4 S2/Omega=3.35%(Set #6)	6-Chloro-4H-1,2,4-benzathiadiazine-7-sulfonamide-1,1-dioxide.	K.Shankland,W.I.F.David,D.S.Sivia	J.MATER.CHEM.,1997,7,,569	P1	fcu/cubic closest packing; 12/3/c1; sqc19
QQQAUG02	C7 H6 Cl1 N3 O4 S2/Omega=3.52%(Set #6)	6-Chloro-4H-1,2,4-benzathiadiazine-7-sulfonamide-1,1-dioxide.	C.K.Leech,F.P.A.Fabbiani,K.Shankland,W.I.F.David,R.Ibberson	ACTA CRYSTALLOGR.,SECT.B:STRUCT.SCI.,2008,64,,101	P1	fcu/cubic closest packing; 12/3/c1; sqc19
QQQAUG03	C7 H6 Cl1 N3 O4 S2/Omega=3.40%(Set #6)	6-Chloro-4H-1,2,4-benzothiadiazine-7-sulfonamide 1,1-dioxide.	C.K.Leech,F.P.A.Fabbiani,K.Shankland,W.I.F.David,R.Ibberson	ACTA CRYSTALLOGR.,SECT.B:STRUCT.SCI.,2008,64,,101	P1	fcu/cubic closest packing; 12/3/c1; sqc19
QQQAUG04	C7 H6 Cl1 N3 O4 S2/Omega=3.37%(Set #6)	6-Chloro-4H-1,2,4-benzathiadiazine-7-sulfonamide-1,1-dioxide.	P.Fernandes,K.Shankland,W.I.F.David,A.J.Markvardsen,A.J.Florence,N.Shankland,C.K.Leech	J.APPL.CRYSTALLOGR.,2008,41,,1089	P1	fcu/cubic closest packing; 12/3/c1; sqc19
QQQAUG05	C7 H6 Cl1 N3 O4 S2/Omega=3.34%(Set #6)	6-Chloro-4H-1,2,4-benzathiadiazine-7-sulfonamide-1,1-dioxide.	P.Fernandes,K.Shankland,W.I.F.David,A.J.Markvardsen,A.J.Florence,N.Shankland,C.K.Leech	J.APPL.CRYSTALLOGR.,2008,41,,1089	P1	fcu/cubic closest packing; 12/3/c1; sqc19
QQQAUG06	C7 H6 Cl1 N3 O4 S2/Omega=3.36%(Set #6)	6-Chloro-4H-1,2,4-benzathiadiazine-7-sulfonamide-1,1-dioxide.	P.Fernandes,K.Shankland,W.I.F.David,A.J.Markvardsen,A.J.Florence,N.Shankland,C.K.Leech	J.APPL.CRYSTALLOGR.,2008,41,,1089	P1	fcu/cubic closest packing; 12/3/c1; sqc19
QQQAUG07	C7 H6 Cl1 N3 O4 S2/Omega=3.42%(Set #6)	6-Chloro-4H-1,2,4-benzathiadiazine-7-sulfonamide-1,1-dioxide.	P.Fernandes,K.Shankland,W.I.F.David,A.J.Markvardsen,A.J.Florence,N.Shankland,C.K.Leech	J.APPL.CRYSTALLOGR.,2008,41,,1089	P1	fcu/cubic closest packing; 12/3/c1; sqc19
QQQAUG08	C7 H6 Cl1 N3 O4 S2/Omega=3.38%(Set #6)	6-Chloro-4H-1,2,4-benzathiadiazine-7-sulfonamide-1,1-dioxide.	P.Fernandes,K.Shankland,W.I.F.David,A.J.Markvardsen,A.J.Florence,N.Shankland,C.K.Leech	J.APPL.CRYSTALLOGR.,2008,41,,1089	P1	fcu/cubic closest packing; 12/3/c1; sqc19
QQQAUG09	C7 H6 Cl1 N3 O4 S2/Omega=3.45%(Set #6)	6-Chloro-4H-1,2,4-benzothiadiazine-7-sulfonamide 1,1-dioxide.	I.D.H.Oswald,A.R.Lennie,C.R.Pulham,K.Shankland	CRYSTENGCOMM,2010,12,,2533	P1	fcu/cubic closest packing; 12/3/c1; sqc19
QQQAUG10	C7 H6 Cl1 N3 O4 S2/Omega=3.34%(Set #6)	6-Chloro-4H-1,2,4-benzothiadiazine-7-sulfonamide 1,1-dioxide.	I.D.H.Oswald,A.R.Lennie,C.R.Pulham,K.Shankland	CRYSTENGCOMM,2010,12,,2533	P1	fcu/cubic closest packing; 12/3/c1; sqc19
QQQAUG11	C7 H6 Cl1 N3 O4 S2/Omega=3.26%(Set #6)	6-Chloro-4H-1,2,4-benzothiadiazine-7-sulfonamide 1,1-dioxide.	I.D.H.Oswald,A.R.Lennie,C.R.Pulham,K.Shankland	CRYSTENGCOMM,2010,12,,2533	P1	fcu/cubic closest packing; 12/3/c1; sqc19
QQQAUG12	C7 H6 Cl1 N3 O4 S2/Omega=3.23%(Set #6)	6-Chloro-4H-1,2,4-benzothiadiazine-7-sulfonamide 1,1-dioxide.	I.D.H.Oswald,A.R.Lennie,C.R.Pulham,K.Shankland	CRYSTENGCOMM,2010,12,,2533	P1	fcu/cubic closest packing; 12/3/c1; sqc19
QQQAUG13	C7 H6 Cl1 N3 O4 S2/Omega=3.07%(Set #6)	6-Chloro-4H-1,2,4-benzothiadiazine-7-sulfonamide 1,1-dioxide.	I.D.H.Oswald,A.R.Lennie,C.R.Pulham,K.Shankland	CRYSTENGCOMM,2010,12,,2533	P1	fcu/cubic closest packing; 12/3/c1; sqc19
QQQAUG14	C7 H6 Cl1 N3 O4 S2/Omega=3.33%(Set #6)	6-Chloro-4H-1,2,4-benzothiadiazine-7-sulfonamide 1,1-dioxide.	I.D.H.Oswald,A.R.Lennie,C.R.Pulham,K.Shankland	CRYSTENGCOMM,2010,12,,2533	P1	fcu/cubic closest packing; 12/3/c1; sqc19
QQQAUG18	C7 H6 Cl1 N3 O4 S2/Omega=3.40%(Set #6)	6-Chloro-4H-1,2,4-benzothiadiazine-7-sulfonamide 1,1-dioxide.	A.Johnston,J.Bardin,B.F.Johnston,P.Fernandes,A.R.Kennedy,S.L.Price,A.J.Florence	CRYST.GROWTH DES.,2011,11,,405	P1	fcu/cubic closest packing; 12/3/c1; sqc19
QUYCOD	C13 H11 Cl2 N1 O2 S1/Omega=2.69%(Set #8)	2,4-Dichloro-N-(3-methylphenyl)benzenesulfonamide.	B.T.Gowda,S.Foro,P.G.Nirmala,H.Fuess	ACTA CRYSTALLOGR.,SECT.E:STRUCT.REP.ONLINE,2010,66,,o1520	P21/c	12T16
ROGFOJ	C7 H7 Cl1 N2 O4 S1/Omega=2.11%(Set #8)	N-(4-Chloro-2-nitrophenyl)methanesulfonamide.	M.Zia-ur-Rehman,J.A.Choudary,N.Akbar,I.U.Khan,M.Nadeem Arshad	ACTA CRYSTALLOGR.,SECT.E:STRUCT.REP.ONLINE,2008,64,,o2034	P21/n	fcu/cubic closest packing; 12/3/c1; sqc19
SAHHOA	C13 H9 Cl1 N2 O5 S1/Omega=2.90%(Set #7)	N-(3-Chlorobenzoyl)-3-nitrobenzenesulfonamide.	P.A.Suchetan,S.Foro,B.T.Gowda	ACTA CRYSTALLOGR.,SECT.E:STRUCT.REP.ONLINE,2012,68,,o244	P21/c	12T25
SEZXIF	C12 H10 Cl2 N2 O2 S1/Omega=5.42%(Set #7)	4-Amino-N-(2,5-dichlorophenyl)benzenesulfonamide.	G.L.Perlovich,V.V.Tkachev,V.P.Kazachenko,O.A.Raevsky	ACTA CRYSTALLOGR.,SECT.E:STRUCT.REP.ONLINE,2007,63,,o1526	P21/c	fcu/cubic closest packing; 12/3/c1; sqc19
ULUTUR	C16 H16 I1 N1 O2 S1/Omega=3.80%(Set #6)	N-(2-Iodo-2,3-dihydro-1H-inden-1-yl)-4-methylbenzenesulfonamide.	S.Minakata,J.Hayakawa	CHEM.COMMUN.,2011,47,,1905	P212121	12T5
UPATIP	C12 H9 Cl2 N1 O2 S1/Omega=4.27%(Set #8)	4-Chloro-N-(3-chlorophenyl)benzenesulfonamide.	K.Shakuntala,S.Foro,B.T.Gowda	ACTA CRYSTALLOGR.,SECT.E:STRUCT.REP.ONLINE,2011,67,,o1017	P21/c	bcu-x/ 14-conn;I m -3 m->C m c m (a-b,a+b,c; 1/4,1/4,1/4);Bond sets: 2,3,4,5:bcu-x
URENIP	C12 H8 Cl3 N1 O2 S1/Omega=1.78%(Set #9)	4-Chloro-N-(3,5-dichlorophenyl)benzenesulfonamide.	K.Shakuntala,S.Foro,B.T.Gowda	ACTA CRYSTALLOGR.,SECT.E:STRUCT.REP.ONLINE,2011,67,,o1219	P-1	bcu-x/ 14-conn;I m -3 m->P 21/c (1/2a+1/2b+1/2c,2a-2b,-c; 1/2,0,1/2);Bond sets: 1,2,4,5,7,8,9:bcu-x
VINMOV	C25 H22 Br1 Cl1 N2 O5 S1/Omega=3.92%(Set #6)	N-((2S,3R)-3-(2-Bromophenyl)-3-chloro-1-oxo-1-(2-oxo-4-phenyl-1,3-oxazolidin-3-yl)propan-2-yl)-4-methylbenzenesulfonamide.	Yi-Ning Wang,A.Kattuboina,Teng Ai,D.Banerjee,Guigen Li	TETRAHEDRON LETT.,2007,48,,7894	P212121	fcu/cubic closest packing; 12/3/c1; sqc19
VUYWIW	C13 H9 Cl2 N1 O3 S1/Omega=2.91%(Set #7)	4-Chloro-N-(4-chlorobenzoyl)benzenesulfonamide.	P.A.Suchetan,B.T.Gowda,S.Foro,H.Fuess	ACTA CRYSTALLOGR.,SECT.E:STRUCT.REP.ONLINE,2010,66,,o1253	Pbca	12T86
WACHEP03	C12 H9 Cl2 N1 O2 S1/Omega=1.07%(Set #8)	N-(2,6-Dichlorophenyl)benzenesulfonamide.	P.Sanphui,B.Sarma,A.Nangia	CRYST.GROWTH DES.,2010,10,,4550	P21/c	fcu/cubic closest packing; 12/3/c1; sqc19
WIHGIE	C7 H7 Cl2 N1 O2 S1/Omega=3.16%(Set #8)	N-(2,3-Dichlorophenyl)methanesulfonamide.	B.T.Gowda,S.Foro,H.Fuess	ACTA CRYSTALLOGR.,SECT.E:STRUCT.REP.ONLINE,2007,63,,o3086	P21/c	12T40
WIHGUQ	C7 H7 Cl2 N1 O2 S1/Omega=3.91%(Set #10)	N-(2,5-Dichlorophenyl)methanesulfonamide.	B.T.Gowda,S.Foro,H.Fuess	ACTA CRYSTALLOGR.,SECT.E:STRUCT.REP.ONLINE,2007,63,,o3088	P-1	12T15
WIHHAX	C7 H7 Cl2 N1 O2 S1/Omega=3.57%(Set #9)	N-(3,4-Dichlorophenyl)methanesulfonamide.	B.T.Gowda,S.Foro,H.Fuess	ACTA CRYSTALLOGR.,SECT.E:STRUCT.REP.ONLINE,2007,63,,o3090	P-1	hcp/hexagonal closest packing; 12/3/h1
WIHHOL	C7 H7 Cl2 N1 O2 S1/Omega=4.68%(Set #7)	N-(3,5-Dichlorophenyl)methanesulfonamide.	B.T.Gowda,S.Foro,H.Fuess	ACTA CRYSTALLOGR.,SECT.E:STRUCT.REP.ONLINE,2007,63,,o3102	P21/c	12T25
WINNAI	C14 H17 Br1 N6 O2 S3/Omega=2.79%(Set #9)	4-Bromo-N-(2-((2-((diaminomethylene)amino)-1,3-thiazol-4-yl)methylthio)ethylaminomethylene)benzenesulfonamide.	Ll.Anglada,J.Fernandez,J.A.Ortiz,X.Solans	ACTA CRYSTALLOGR.,SECT.C:CRYST.STRUCT.COMMUN.,1995,51,,447	P-1	bcu-x/ 14-conn;I m -3 m->P -1 (-1/2a+1/2b+1/2c,1/2a-1/2b+1/2c,a+b; 3/4,3/4,1/4);Bond sets: 2,3,4,5,6,7,8,9,11:bcu-x
WOJRUI	C14 H14 Br1 N1 O2 S1/Omega=3.30%(Set #6)	(S)-N-(\a-Methylbenzyl)-4-bromobenzenesulfonamide.	M.S.Hendi,R.E.Davis,K.A.Wheeler	CRYSTAL ENGINEERING,2000,3,,209	P21	fcu/cubic closest packing; 12/3/c1; sqc19
YAGWUA	C12 H7 Cl4 N1 O2 S1/Omega=1.88%(Set #10)	2,4-Dichloro-N-(3,5-dichlorophenyl)benzenesulfonamide.	V.Z.Rodrigues,S.Foro,B.T.Gowda	ACTA CRYSTALLOGR.,SECT.E:STRUCT.REP.ONLINE,2011,67,,o2976	P-1	12T15
YUKYIN	C14 H11 Cl1 F5 N1 O3 S2/Omega=2.20%(Set #6)	5-Chloro-N-((2S,3R)-3-(3,5-difluorophenyl)-4,4,4-trifluoro-1-hydroxybutan-2-yl)thiophene-2-sulfonamide.	A.Alimardanov,A.Nikitenko,T.J.Connolly,G.Feigelson,A.W.Chan,Zhixian Ding,M.Ghosh,Xinxu Shi,Jianxin Ren,E.Hansen,R.Farr,M.MacEwan,S.Tadayon,D.M.Springer,A.F.Kreft,D.M.Ho,J.R.Potoski	Org.Process Res.Dev.,2009,13,,1161	P212121	fcu/cubic closest packing; 12/3/c1; sqc19
MUVYUY	C26 H25 Br1 N2 O4 S1/Omega=2.84%(Set #22)	N-((4-Bromophenyl)(4-isopropyl-5-oxo-2-phenyl-4,5-dihydro-1,3-oxazol-4-yl)methyl)-4-methylbenzenesulfonamide.	Xiaodong Liu,Leijiao Deng,Xianxing Jiang,Wenjin Yan,Chunliang Liu,Rui Wang	Org.Lett.,2010,12,,876	P-1	12,12T37
IGOMOG	C25 H31 Br2 N1 O8 S1/Omega=1.37%(Set #19)	1-Bromo-4-(p-toluenesulfonamide)-5,6-(isopropylidenedioxy)cyclohexen-3-yl1-bromo-3-hydroxy-5,6-(isopropylidenedioxy)cyclohexen-4-yl ether.	B.J.Paul,J.Willis,T.A.Martinot,I.Ghiviriga,K.A.Abboud,T.Hudlicky	J.AM.CHEM.SOC.,2002,124,,10416	P21	12,12T38
IGOMOG	C25 H31 Br2 N1 O8 S1/Omega=1.67%(Set #18)	1-Bromo-4-(p-toluenesulfonamide)-5,6-(isopropylidenedioxy)cyclohexen-3-yl1-bromo-3-hydroxy-5,6-(isopropylidenedioxy)cyclohexen-4-yl ether.	B.J.Paul,J.Willis,T.A.Martinot,I.Ghiviriga,K.A.Abboud,T.Hudlicky	J.AM.CHEM.SOC.,2002,124,,10416	P21	12,12T38
CIJCUV	C17 H17 Br1 N4 O4 S1/Omega=2.10%(Set #10)	N-(5-(2-Bromophenyl)-1,3-dimethyl-4,5-dihydro-1H-pyrazol-4-yl)-4-nitrobenzenesulfonamide.	Zhen Zhang,De Wang,Yin Wei,Min Shi	CHEM.COMMUN.,2012,48,,9607	P-1	fcu/cubic closest packing; 12/3/c1; sqc19
NEQGIB	C12 H9 Cl1 N2 O4 S1/Omega=2.40%(Set #6)	N-(4-Chlorophenyl)-4-nitrobenzenesulfonamide.	U.Chaithanya,S.Foro,B.T.Gowda	ACTA CRYSTALLOGR.,SECT.E:STRUCT.REP.ONLINE,2013,69,,o7	Cc	hcp/hexagonal closest packing; 12/3/h1
NEQSOT	C12 H8 Cl2 N2 O4 S1/Omega=4.93%(Set #8)	N-(2,3-Dichlorophenyl)-2-nitrobenzenesulfonamide.	U.Chaithanya,S.Foro,B.T.Gowda	ACTA CRYSTALLOGR.,SECT.E:STRUCT.REP.ONLINE,2013,69,,o76	P21/n	fcu/cubic closest packing; 12/3/c1; sqc19
NIFROL	C24 H25 Br1 N4 O7 S2/Omega=2.01%(Set #18)	N-(1-(2-Bromophenyl)-1-(2-methyl-2-((4-methylphenyl)sulfonyl)hydrazino)-3-oxobutan-2-yl)-4-nitrobenzenesulfonamide unknown solvate.	Zhen Zhang,De Wang,Yin Wei,Min Shi	CHEM.COMMUN.,2012,48,,9607	Pna21	bcu-x/ 14-conn;I m -3 m->P b c n (2a+2b,c,a-b; 1/4,1/4,1/4);Bond sets: 1,2,3,5,6,7,9:bcu-x
PEDBOR	C11 H15 Cl1 N2 O3 S1/Omega=1.82%(Set #9)	4-(5-Chloropentanamido)benzenesulfonamide.	H.Turkmen,S.P.Yalcin,M.Akkurt,M.Durgun	ACTA CRYSTALLOGR.,SECT.E:STRUCT.REP.ONLINE,2012,68,,o3475	P-1	hcp/hexagonal closest packing; 12/3/h1
FIYYES	C6 H6 I1 N1 O2 S1/Omega=2.16%(Set #18)	4-Iodobenzenesulfonamide.	E.-M.Zerbe,O.Moers,P.G.Jones,A.Blaschette	Z.NATURFORSCH.,B:CHEM.SCI.,2005,60,,125	Pc	hcp/hexagonal closest packing; 12/3/h1
NISBIB	C17 H18 Br1 N1 O2 S1/Omega=3.62%(Set #20)	(S)-(E)-4-Bromo-N-(2-methyl-1-phenylbut-2-enyl)benzenesulfonamide.	Ming-Yu Ngai,A.Barchuk,M.J.Krische	J.AM.CHEM.SOC.,2007,129,,12644	P21	fcu/cubic closest packing; 12/3/c1; sqc19
OHAXIE	C23 H28 Cl1 N1 O4 S1/Omega=3.15%(Set #23)	N-((4-Chlorophenyl)(4-methoxy-2-cyclo-octyl)methyl)-4-methylbenzenesulfonamide.	Min Shi,Yong-Mei Xu,Gui-LIng Zhao,Xiao-Feng Wu	EUR.J.ORG.CHEM.,2002,,,3666	P-1	12,12T39
OHAXIE	C23 H28 Cl1 N1 O4 S1/Omega=3.53%(Set #22)	N-((4-Chlorophenyl)(4-methoxy-2-cyclo-octyl)methyl)-4-methylbenzenesulfonamide.	Min Shi,Yong-Mei Xu,Gui-LIng Zhao,Xiao-Feng Wu	EUR.J.ORG.CHEM.,2002,,,3666	P-1	12,12T39
RARCUK	C26 H25 Cl1 N2 O4 S1/Omega=2.81%(Set #22)	(R*,S*)-N-((4-Chlorophenyl)(4-isopropyl-5-oxo-2-phenyl-4,5-dihydro-1,3-oxazol-4-yl)methyl)-4-methylbenzenesulfonamide.	Shi-Hui Shi,Fu-Ping Huang,Ping Zhu,Zhen-Wen Dong,Xin-Ping Hui	Org.Lett.,2012,14,,2010	P-1	12,12T40
RIZMOD	C22 H16 Cl1 N3 O4 S1/Omega=2.50%(Set #23)	Z-3-(2-(4-(4-Chlorophenylsulfonamido)phenyl)-2-oxoethylidene)-3,4-dihydro-1H-quinoxaline-2-one.	Cheng-Chu Zeng,Xue-Mei Li,Hong Yan,Ru-Gang Zhong	CHIN.J.CHEM.,2007,25,,1174	P-1	fcu/cubic closest packing; 12/3/c1; sqc19
RIZMOD	C22 H16 Cl1 N3 O4 S1/Omega=2.61%(Set #22)	Z-3-(2-(4-(4-Chlorophenylsulfonamido)phenyl)-2-oxoethylidene)-3,4-dihydro-1H-quinoxaline-2-one.	Cheng-Chu Zeng,Xue-Mei Li,Hong Yan,Ru-Gang Zhong	CHIN.J.CHEM.,2007,25,,1174	P-1	fcu/cubic closest packing; 12/3/c1; sqc19
URETER	C12 H10 Cl1 N1 O2 S1/Omega=2.48%(Set #25)	4-Chloro-N-phenylbenzenesulfonamide.	K.Shakuntala,S.Foro,B.T.Gowda	ACTA CRYSTALLOGR.,SECT.E:STRUCT.REP.ONLINE,2011,67,,o1252	P-1	12,12T41
URETER	C12 H10 Cl1 N1 O2 S1/Omega=2.60%(Set #24)	4-Chloro-N-phenylbenzenesulfonamide.	K.Shakuntala,S.Foro,B.T.Gowda	ACTA CRYSTALLOGR.,SECT.E:STRUCT.REP.ONLINE,2011,67,,o1252	P-1	12,12T41
EBAQIH01	C12 H19 I1 N2 O6 S1 Si1/Omega=4.67%(Set #6)	N,N-Dimethyl2-methoxycarbonyloxycarbonyl-3-trimethylsilyl-4-iodo-1H-pyrrole-1-sulfonamide.	R.E.Marsh	ACTA CRYSTALLOGR.,SECT.B:STRUCT.SCI.,2004,60,,252	P21	fcu/cubic closest packing; 12/3/c1; sqc19
EBAQIH	C12 H19 I1 N2 O6 S1 Si1/Omega=4.61%(Set #20)	N,N-Dimethyl2-methoxycarbonyloxycarbonyl-3-trimethylsilyl-4-iodo-1H-pyrrole-1-sulfonamide.	Jian-Hui Liu,Qing-Chuan Yang,T.C.W.Mak,H.N.C.Wong	J.ORG.CHEM.,2000,65,,3587	P1	fcu/cubic closest packing; 12/3/c1; sqc19
ATEHEN	C28 H22 I1 N1 O2 S1/Omega=2.93%(Set #8)	N-(2-Iodo-1,3,3-triphenylprop-2-en-1-ylidene)-4-methylbenzenesulfonamide.	Yuanxun Zhu,Guangwei Yin,Deng Hong,Ping Lu,Yanguang Wang	Org.Lett.,2011,13,,1024	P21/c	bcu-x/ 14-conn;I m -3 m->I b c a (a+b,c,2a-2b; 3/4,1/4,1/4);Bond sets: 1,2,3,5,6:bcu-x
IDULID	C21 H10 Br2 F4 N2 O4 S2/Omega=2.51%(Set #8)	N-(5,7-Dibromo-8-quinolyl)-N-(3,5-difluorophenylsulfonyl)-3,5-difluorobenzenesulfonamide.	L.E.da Silva,A.C.Joussef,S.Foro,B.Schmidt	ACTA CRYSTALLOGR.,SECT.E:STRUCT.REP.ONLINE,2006,62,,o2630	P21/n	12T51
IWEHOI	C18 H16 Br1 Cl1 N2 O3 S1/Omega=2.15%(Set #8)	N-(2-(4-Bromophenyl)-5-chloro-4H-1,3-oxazin-6-yl)-N,4-dimethylbenzenesulfonamide.	A.S.K.Hashmi,A.M.Schuster,M.Zimmer,F.Rominger	Chem.-Eur.J.,2011,17,,5511	P21/n	12T75
MOCVUW	C16 H16 Cl2 N2 O4 S1/Omega=3.38%(Set #7)	N-(2,2-Dichloro-2-nitro-1-p-tolylethyl)-4-methylbenzenesulfonamide.	Sanjun Zhi,Jianlin Han,Chen Li,Guanghui An,Yi Pan,Guigen Li	SYNTHESIS,2008,,,1570	Pbca	12T34
NACMOV	C14 H14 Br2 Cl1 N5 O4 S1/Omega=1.61%(Set #6)	4-(2-Chloro-3-(5,6-dibromo-1,3-dioxo-1H-pyrrolo[1,2-c]imidazol-2(3H)-yl)propyl)-N,N-dimethyl-1H-imidazole-1-sulfonamide.	S.Mukherjee,R.Sivappa,M.Yousufuddin,C.J.Lovely	SYNLETT,2010,,,817	P21	12T11
UQAGUP	C15 H18 Br1 N1 O4 S1/Omega=1.62%(Set #8)	(Z)-N-(4-Bromo-5-ethoxy-3,5-dimethylfuran-2(5H)-ylidene)-4-methylbenzenesulfonamide.	Shi-Jie Zhang,Wei-Xiao Hu	Jiegou Huaxue(Chin.J.Struct.Chem.),2010,29,,1275	P21/c	hcp/hexagonal closest packing; 12/3/h1
VEYBAD	C17 H19 I2 N1 O2 S1/Omega=1.33%(Set #6)	(R)-N-(3-iodo-4-methylphenyl)-N-(2-iodopropyl)-4-methylbenzenesulfonamide.	A.Rudolph,N.Rackelmann,M.Lautens	Angew.Chem.,Int.Ed.,2007,46,,1485	P212121	hcp/hexagonal closest packing; 12/3/h1
YUQHAU	C21 H24 Cl1 N1 O6 S1/Omega=2.51%(Set #6)	Methyl5-chloro-2-[N-(3-ethoxycarbonylpropyl)-4-methylbenzenesulfonamido]benzoate.	Bin Wang,Ru Jia,Ya-Bin Shi,Fei-Fei He,Hai-Bo Wang	ACTA CRYSTALLOGR.,SECT.E:STRUCT.REP.ONLINE,2010,66,,o1819	P212121	bcu-x/ 14-conn;I m -3 m->P n m a (2a,c,-b; 1/4,1/4,1/4);Bond sets: 2,3,4,5,6:bcu-x

## Sheet: S6_H bonds
ABEDOC	C28 H22 N2 O2 S1	N-(2-Cyano-1,3,3-triphenylprop-2-en-1-yl)benzenesulfonamide.	Yuanxun Zhu,Shan Wen,Guangwei Yin,Deng Hong,Ping Lu,Yanguang Wang	Org.Lett.,2011,13,,3553	P-1	0D		B01	1M2-1
ABEMOK	C21 H27 N1 O4 S1	N-(3-Isopropoxy-4-methoxy-2-((E)-1-propenyl)benzyl)(phenyl)methanesulfonamide.	W.A.L.van Otterlo,J.-L.Panayides,M.A.Fernandes	ACTA CRYSTALLOGR.,SECT.E:STRUCT.REP.ONLINE,2004,60,,o1586	P21/c	0D		B01	1M2-1
ADAGUI	C10 H7 Cl1 N4 O2 S2	6-(4-Chlorophenyl)imidazo(2,1-b)(1,3,4)thiadiazole-2-sulfonamide.	G.N.Anilkumar,M.K.Kokila,Puttaraja,S.S.Karki,M.V.Kulkarni	ACTA CRYSTALLOGR.,SECT.E:STRUCT.REP.ONLINE,2006,62,,o2014	P21/c	2D	(0,1,0)	K4	sql/Shubnikov tetragonal plane net
ADILOP	C16 H21 N3 O4 S1	4-(2-(3-Ethyl-4-methyl-2-oxo-3-pyrrolidine-1-carboxamido)ethyl)benzenesulfonamide.	Xiang Li	ACTA CRYSTALLOGR.,SECT.E:STRUCT.REP.ONLINE,2006,62,,o3019	P21/n	1D	[0,1,0]	B2	2C1
AFOQIV	C12 H14 N2 O6 S1	N-(2,5-Dimethyl-4H-1,3-dioxin-4-yl)-4-nitro-benzenesulfonamide.	C.Wattenbach,S.Flock,H.Frauenrath,R.Palme-Konig,U.Muller	Z.KRISTALLOGR.-NEW CRYST.STRUCT.,2001,216,,399	P21/n	1D	[0,1,0]	B2	2C1
AFOQOB	C17 H25 N1 O4 S1	N-(2-t-Butyl-5-ethyl-4H-1,3-dioxin-4-yl)-4-methyl-benzenesulfonamide.	C.Wattenbach,S.Flock,H.Frauenrath,R.Palme-Konig,U.Muller	Z.KRISTALLOGR.-NEW CRYST.STRUCT.,2001,216,,401	P21/c	0D		B01	1M2-1
AHEQAF	C18 H19 N3 O3 S1	N-(3-Cyano-2-oxo-2,5,6,7,8,9-hexahydro-1H-cyclohepta(b)pyridin-1-yl)-4-methylbenzenesulfonamide.	G.H.Elgemeie,M.A.Mahmoud,P.G.Jones	ACTA CRYSTALLOGR.,SECT.E:STRUCT.REP.ONLINE,2002,58,,o1293	P21/n	0D		B01	1M2-1
AHUCEM	C14 H21 N1 O5 S1	N-(4,5-Dihydroxy-3-(hydroxymethyl)-1-hexen-3-yl)-4-methylbenzenesulfonamide.	X.Ariza,J.Cornella,M.Font-Bardia,J.Garcia,J.Ortiz,C.Sanchez,X.Solans	Angew.Chem.,Int.Ed.,2009,48,,4202	P212121	3D		G6	sxd; 6/3/o1
AJIBAX	C14 H15 N1 O2 S1	4-Methyl-N-(2-methylphenyl)benzenesulfonamide.	P.G.Nirmala,B.T.Gowda,S.Foro,H.Fuess	ACTA CRYSTALLOGR.,SECT.E:STRUCT.REP.ONLINE,2009,65,,o3184	Pbca	0D		B01	1M2-1
ALOSEA	C17 H14 Br1 N3 O4 S1	4-((E)-(5-Bromo-2-hydroxybenzylidene)amino)-N-(5-methyl-1,2-oxazol-3-yl)benzenesulfonamide.	Z.H.Chohan,H.A.Shad,L.Toupet,T.B.Hadda,M.Akkurt	J.Chem.Cryst.,2011,41,,159	C2/c	0D		B01	1M2-1
ANOZOT	C10 H11 F1 N2 O4 S1	N-(4-Fluorophenyl)-2-oxo-1,3-oxazinane-3-sulfonamide.	M.Nessaib,A.Djahhoudi,A.Seridi,H.Akkari,N.-E.Aouf,J.-C.Daran,M.Abdaoui	Heterocycles,2011,83,,1041	P21/c	0D		B01	1M2-1
AQULAA	C25 H35 N1 O3 S1	N-Benzyl-N-(2-butyl-2-(1-hydroxy-2-methylpropyl)cyclopropyl)-4-methylbenzenesulfonamide.	P.Valenta,P.J.Carroll,P.J.Walsh	J.AM.CHEM.SOC.,2010,132,,14179	Pbcn	1D	[0,1,0]	B2	2C1
AQULII	C27 H31 N1 O3 S1	N-(3-Hydroxy-3-phenyl-2-(5,6,7,8-tetrahydronaphthalen-2-yl)propyl)-N,4-dimethylbenzenesulfonamide.	P.Valenta,P.J.Carroll,P.J.Walsh	J.AM.CHEM.SOC.,2010,132,,14179	P21/n	0D		B01	1M2-1
ASUMEG	C20 H15 Br1 N2 O2 S1	4-Bromo-N-(2-phenyl-1H-indol-7-yl)benzenesulfonamide.	Xiang-Hong Huang,Qian-Feng Zhang,H.H.Y.Sung	ACTA CRYSTALLOGR.,SECT.E:STRUCT.REP.ONLINE,2004,60,,o488	C2/c	1D	[0,1,0]	K21	SP 1-periodic net (4,4)(0,2)
ATAHOT	C23 H19 N1 O3 S1	N-((1-Hydroxy-2-naphthyl)(phenyl)methyl)benzenesulfonamide.	Guixia Liu,Shilei Zhang,Hao Li,Tangzhi Zhang,Wei Wang	Org.Lett.,2011,13,,828	P21	1D	[0,1,0]	B2	2C1
ATAJEL	C26 H25 N3 O6 S1	N-(1-Acetyl-3-(1-(4-methoxyphenyl)-2-nitroethyl)-1H-indol-2-yl)-4-methylbenzenesulfonamide.	Zhiyuan Chen,Danqing Zheng,Jie Wu	Org.Lett.,2011,13,,848	P21/n	0D		B01	1M2-1
ATDZSA	C4 H6 N4 O3 S2	5-Acetamido-1,3,4-thiadiazole-2-sulfonamide.	M.Mathew,G.J.Palenik	J.CHEM.SOC.,PERKIN TRANS.2,1974,,,532	P-1	2D	(1,-1,1)	G03	hcb; Shubnikov hexagonal plane net/(6,3)
ATDZSA02	C4 H6 N4 O3 S2	2-Acetylamino-1,3,4-thiadiazole-5-sulfonamide.	Y.Nagao,T.Honjo,H.Iimori,S.Goto,S.Sano,M.Shiro,K.Yamaguchi,Y.Sei	TETRAHEDRON LETT.,2004,45,,8757	P-1	2D	(1,-1,1)	G03	hcb; Shubnikov hexagonal plane net/(6,3)
ATEGUC	C28 H22 I1 N1 O2 S1	N-(2-Iodo-1,3-diphenyl-1H-inden-1-yl)-4-methylbenzenesulfonamide.	Yuanxun Zhu,Guangwei Yin,Deng Hong,Ping Lu,Yanguang Wang	Org.Lett.,2011,13,,1024	P-1	0D		B01	1M2-1
ATOVOU	C15 H21 N1 O2 S1	N-((1S,2R,5S)-(Bicyclo(3.3.0)oct-2-yl))-4-methylbenzenesulfonamide.	P.Muller,D.Riegert,G.Bernardinelli	HELV.CHIM.ACTA,2004,87,,227	P212121	1D	[1,0,0]	B2	2C1
ATOVUA	C16 H23 N1 O2 S1	N-((1S,2R,6S)-(Bicyclo(4.3.0)non-2-yl))-4-methylbenzenesulfonamide.	P.Muller,D.Riegert,G.Bernardinelli	HELV.CHIM.ACTA,2004,87,,227	P212121	1D	[1,0,0]	B2	2C1
ATUHAZ	C19 H20 N2 O4 S1	4-Methyl-N-(1-(4-methyl-5-oxo-2-phenyl-4,5-dihydro-1,3-oxazol-4-yl)ethyl)benzenesulfonamide.	A.D.Melhado,G.W.Amarante,Z.J.Wang,M.Luparia,F.D.Toste	J.AM.CHEM.SOC.,2011,133,,3517	P3121	0D		B01	1M2-1
ATUHED	C26 H26 N2 O4 S1	2,4,6-Trimethyl-N-((4-methyl-5-oxo-2-phenyl-4,5-dihydro-1,3-oxazol-4-yl)(phenyl)methyl)benzenesulfonamide unknown solvate.	A.D.Melhado,G.W.Amarante,Z.J.Wang,M.Luparia,F.D.Toste	J.AM.CHEM.SOC.,2011,133,,3517	P212121	1D	[1,0,0]	B2	2C1
AVOHUP	C24 H21 N1 O3 S1	N-((2-Hydroxy-1-naphthyl)(phenyl)methyl)-4-methylbenzenesulfonamide.	P.Chauhan,S.S.Chimni	EUR.J.ORG.CHEM.,2011,,,1636	P21	1D	[0,1,0]	B2	2C1
AWICIT	C14 H11 Cl2 N1 O3 S1	N-(4-acetylphenyl)-2,5-dichlorobenzenesulfonamide.	W.B.Fernandes,A.Q.Aragao,F.T.Martins,C.Noda-Perez,C.Lariucci,H.B.Napolitano	ACTA CRYSTALLOGR.,SECT.C:CRYST.STRUCT.COMMUN.,2011,67,,o226	P21/c	1D	[0,1,0]	B2	2C1
AWICOZ	C14 H13 N1 O3 S1	N-(4-acetylphenyl)benzenesulfonamide.	W.B.Fernandes,A.Q.Aragao,F.T.Martins,C.Noda-Perez,C.Lariucci,H.B.Napolitano	ACTA CRYSTALLOGR.,SECT.C:CRYST.STRUCT.COMMUN.,2011,67,,o226	P21/c	1D	[0,1,0]	B2	2C1
AWIHUK	C32 H31 N1 O7 S1	dibenzyl 2-benzyl-2-hydroxy-3-(4-methylphenylsulfonamido)-succinate.	S.Mekki,V.Rolland,S.Bellahouel,A.van der Lee,M.Rolland	ACTA CRYSTALLOGR.,SECT.C:CRYST.STRUCT.COMMUN.,2011,67,,o301	P-1	0D		K0001	1M2-1
AWIHUK01	C32 H31 N1 O7 S1	dibenzyl 2-benzyl-2-hydroxy-3-(4-methylphenylsulfonamido)-succinate.	S.Mekki,V.Rolland,S.Bellahouel,A.van der Lee,M.Rolland	ACTA CRYSTALLOGR.,SECT.C:CRYST.STRUCT.COMMUN.,2011,67,,o301	P21/c	0D		K0001	1M2-1
AYEQAW	C46 H50 B1 N1 O7 S1 Si1	N-[1-(3-(4,5-bis[methoxy(diphenyl)methyl]-1,3,2-dioxaborolan-2-yl)-2-furyl)-2-trimethylsilylethyl]-4-methylbenzenesulfonamide.	Ho-Kee Yim,H.N.C.Wong	J.ORG.CHEM.,2004,69,,2892	I4	0D		B2	2M4-1
AYONOS	C14 H16 N2 O4 S2	N,N'-Ethane-1,2-diyldibenzenesulfonamide.	M.T.M.Al-Dajani,J.Talaat,N.Mohamed,M.Hemamalini,H.-K.Fun	ACTA CRYSTALLOGR.,SECT.E:STRUCT.REP.ONLINE,2011,67,,o2214	P21/c	1D	[1,0,0]	K02	2C1
AYOTIS	C13 H11 Cl2 N1 O2 S1	N-(2,4-Dichlorophenyl)-4-methylbenzenesulfonamide.	K.Shakuntala,S.Foro,B.T.Gowda	ACTA CRYSTALLOGR.,SECT.E:STRUCT.REP.ONLINE,2011,67,,o2252	P21/c	0D		B01	1M2-1
AYOVOA	C16 H19 N1 O2 S1	N-(2,6-Dimethylphenyl)-2,4-dimethylbenzenesulfonamide.	P.G.Nirmala,S.Foro,B.T.Gowda	ACTA CRYSTALLOGR.,SECT.E:STRUCT.REP.ONLINE,2011,67,,o2258	P2/c	0D		B01	1M2-1
AYURUI	C17 H22 N2 O4 S2	N,N'-Propane-1,3-diylbis(4-methylbenzenesulfonamide).	I.U.Khan,T.A.Sheikh,Ejaz,W.T.A.Harrison	ACTA CRYSTALLOGR.,SECT.E:STRUCT.REP.ONLINE,2011,67,,o2371	Aba2	2D	(0,1,0)	K4	sql/Shubnikov tetragonal plane net
AZACOU	C16 H12 F3 N3 O2 S1	4-(5-Phenyl-3-(trifluoromethyl)-1H-pyrazol-1-yl)benzenesulfonamide.	A.M.Asiri,A.O.Al-Youbi,H.M.Faidallah,S.W.Ng,E.R.T.Tiekink	ACTA CRYSTALLOGR.,SECT.E:STRUCT.REP.ONLINE,2011,67,,o2424	P21/c	1D	[0,1,0]	K21	SP 1-periodic net (4,4)(0,2)
AZADAH	C16 H15 N3 O2 S1	4-(3-Methyl-5-phenyl-1H-pyrazol-1-yl)benzenesulfonamide.	A.M.Asiri,H.M.Faidallah,A.O.Al-Youbi,S.A.Basaif,S.W.Ng	ACTA CRYSTALLOGR.,SECT.E:STRUCT.REP.ONLINE,2011,67,,o2426	C2/c	2D	(1,0,0)	K21	hcb; Shubnikov hexagonal plane net/(6,3)
AZADEL	C11 H13 N3 O2 S1	4-(3,5-Dimethyl-1H-pyrazol-1-yl)benzenesulfonamide.	A.M.Asiri,H.M.Faidallah,A.O.Al-Youbi,S.W.Ng	ACTA CRYSTALLOGR.,SECT.E:STRUCT.REP.ONLINE,2011,67,,o2427	P21/n	2D	(1,0,-1)	K21	hcb; Shubnikov hexagonal plane net/(6,3)
AZADIP	C15 H13 N3 O3 S1	4-(5-Oxo-3-phenyl-4,5-dihydro-1H-pyrazol-1-yl)benzenesulfonamide.	A.O.Al-Youbi,A.M.Asiri,H.M.Faidallah,K.A.Alamry,S.W.Ng	ACTA CRYSTALLOGR.,SECT.E:STRUCT.REP.ONLINE,2011,67,,o2428	P21/c	2D	(1,0,0)	K21	hcb; Shubnikov hexagonal plane net/(6,3)
AZAGUE	C18 H17 N3 O2 S1	4-(3-Methyl-4,5-dihydro-1H-benzo[g]indazol-1-yl)benzenesulfonamide.	A.M.Asiri,H.M.Faidallah,A.O.Al-Youbi,M.S.I.T.Makki,S.W.Ng	ACTA CRYSTALLOGR.,SECT.E:STRUCT.REP.ONLINE,2011,67,,o2441	P21/n	2D	(0,1,0)	K4	sql/Shubnikov tetragonal plane net
AZAHUF	C20 H23 N3 O3 S3	N-((2S)-3-Hydroxy-4-[(5-methyl-1,3,4-thiadiazol-2-yl)sulfanyl]-1-phenyl-2-butyl)-4-methylbenzenesulfonamide.	C.R.B.Gomes,T.R.A.Vasconcelos,W.T.V.Junior,W.Cunico,J.L.Wardell,S.M.S.V.Wardell,E.R.T.Tiekink	ACTA CRYSTALLOGR.,SECT.E:STRUCT.REP.ONLINE,2011,67,,o2447	P212121	1D	[1,0,0]	K02	2C1
AZAKUI	C19 H20 N2 O2 S1	N-Benzyl-5-(dimethylamino)naphthalene-1-sulfonamide.	P.Bhatt,T.Govender,H.G.Kruger,G.E.M.Maguire	ACTA CRYSTALLOGR.,SECT.E:STRUCT.REP.ONLINE,2011,67,,o2458	C2/c	0D		B01	1M2-1
AZAMEU	C13 H12 N4 O4 S1	4-(3,7-Dimethyl-4-oxo-4,5-dihydroisoxazolo[4,5-d]pyridazin-5-yl)benzenesulfonamide.	A.M.Asiri,H.M.Faidallah,A.O.Al-Youbi,Abdullah.Y.Obaid,S.W.Ng	ACTA CRYSTALLOGR.,SECT.E:STRUCT.REP.ONLINE,2011,67,,o2466	Fdd2	1D	[0,0,1]	T4	SP 1-periodic net (3,6)(1,2)
AZERIH	C15 H17 N1 O2 S1	N-(2,6-Dimethylphenyl)-3-methylbenzenesulfonamide.	P.Sanphui,B.Sarma,A.Nangia	CRYST.GROWTH DES.,2010,10,,4550	P21/c	0D		B01	1M2-1
AZERIH01	C15 H17 N1 O2 S1	N-(2,6-Dimethylphenyl)-3-methylbenzenesulfonamide.	P.Sanphui,B.Sarma,A.Nangia	CRYST.GROWTH DES.,2010,10,,4550	P-1	0D		B01	1M2-1
AZERON01	C13 H11 Cl2 N1 O2 S1	N-(2,6-Dichlorophenyl)-3-methylbenzenesulfonamide.	P.Sanphui,B.Sarma,A.Nangia	CRYST.GROWTH DES.,2010,10,,4550	P21	1D	[1,0,0]	B2	2C1
AZERUT	C14 H14 Cl1 N1 O2 S1	N-(2,6-Dimethylphenyl)-3-chlorobenzenesulfonamide.	P.Sanphui,B.Sarma,A.Nangia	CRYST.GROWTH DES.,2010,10,,4550	P21/n	0D		B01	1M2-1
AZESAA	C13 H11 Cl2 N1 O2 S1	3-Chloro-N-(2-chloro-6-methylphenyl)benzenesulfonamide.	P.Sanphui,B.Sarma,A.Nangia	CRYST.GROWTH DES.,2010,10,,4550	P21/n	0D		B01	1M2-1
AZESOO	C12 H9 Cl2 N1 O2 S1	N-(4-chlorophenyl)-3-chlorobenzenesulfonamide.	P.Sanphui,B.Sarma,A.Nangia	CRYST.GROWTH DES.,2010,10,,4550	Pbca	1D	[0,1,0]	B2	2C1
AZESUU	C13 H12 Cl1 N1 O2 S1	N-(4-chlorophenyl)-3-methylbenzenesulfonamide.	P.Sanphui,B.Sarma,A.Nangia	CRYST.GROWTH DES.,2010,10,,4550	P21/c	0D		B01	1M2-1
AZETAB	C13 H12 F1 N1 O2 S1	N-(3-fluorophenyl)-4-methylbenzenesulfonamide.	P.Sanphui,B.Sarma,A.Nangia	CRYST.GROWTH DES.,2010,10,,4550	P21/n	0D		B01	1M2-1
AZETAB01	C13 H12 F1 N1 O2 S1	N-(3-fluorophenyl)-4-methylbenzenesulfonamide.	P.Sanphui,B.Sarma,A.Nangia	CRYST.GROWTH DES.,2010,10,,4550	P21/c	0D		B01	1M2-1
AZETEF	C14 H14 Cl1 N1 O2 S1	N-(3-chloro-4-methylphenyl)-4-methylbenzenesulfonamide.	P.Sanphui,B.Sarma,A.Nangia	CRYST.GROWTH DES.,2010,10,,4550	P-1	0D		B01	1M2-1
AZETIJ	C14 H14 F1 N1 O2 S1	N-(3-fluoro-4-methylphenyl)-4-methylbenzenesulfonamide.	P.Sanphui,B.Sarma,A.Nangia	CRYST.GROWTH DES.,2010,10,,4550	P-1	0D		B01	1M2-1
AZTSCH	C34 H54 N4 O2 S1	3\b-Azido-2\a-(toluene-p-sulfonamido)-5\a-cholestane.	G.M.L.Cragg,P.A.McCallum,L.R.Nassimbeni,A.L.Rodgers,J.C.van Niekerk	S.Afr.J.Chem.,1979,32,,97	P21	1D	[0,1,0]	B2	2C1
AZUGAE	C15 H16 Cl1 N1 O2 S1	4-Chloro-N-(2,4-dimethylphenyl)-2-methylbenzenesulfonamide.	V.Z.Rodrigues,S.Foro,B.T.Gowda	ACTA CRYSTALLOGR.,SECT.E:STRUCT.REP.ONLINE,2011,67,,o2648	P21/n	0D		B01	1M2-1
AZUNAL	C14 H13 Cl2 N1 O2 S1	2,4-Dichloro-N-(2,6-dimethylphenyl)benzenesulfonamide.	V.Z.Rodrigues,S.Foro,B.T.Gowda	ACTA CRYSTALLOGR.,SECT.E:STRUCT.REP.ONLINE,2011,67,,o2691	P21/n	1D	[0,1,0]	B2	2C1
BABBIP	C32 H37 N1 O3 S1	anti-8-t-Butoxy-exo-3,3-diphenyl-2-(p-toluenesulfonamidomethyl)-tricyclo(3.2.1.0^2,4^)octane.	S.F.Pavkovic,P.G.Santangelo	ACTA CRYSTALLOGR.,SECT.B:STRUCT.CRYSTALLOGR.CRYST.CHEM.,1981,37,,1762	P21/c	0D		B01	1M2-1
BAGBUI	C21 H33 N3 O2 S2	N-(1-(2-(Diethylamino)-1,3-thiazol-5-yl)heptyl)-4-methylbenzenesulfonamide.	L.Albrecht,L.K.Ransborg,A.Albrecht,L.Lykke,K.A.Jorgensen	Chem.-Eur.J.,2011,17,,13240	P212121	1D	[1,0,0]	B2	2C1
BASYEB	C20 H20 N2 O3 S1	(Z)-4-Methyl-N-(2-((2-oxonaphthalen-1(2H)-ylidene)-methylamino)ethyl)benzenesulfonamide.	G.Alpaslan,M.Macit,A.Erdonmez,O.Buyukgungor	J.MOL.STRUCT.,2012,1016,,22	Pc	1D	[0,1,0]	B2	2C1
BBSPRT10	C9 H8 Br1 N1 O3 S2	(S)-\a-(p-Bromobenzenesulfonamido)-\b-propiothiolactone.	I.Matijasic,G.D.Andreetti,P.Sgarabotto,A.Bezjak,D.Fles	CROAT.CHEM.ACTA,1984,57,,621	P212121	1D	[1,0,0]	B2	2C1
BEDMIG01	C10 H13 Cl1 N2 O3 S1	4-Chloro-N-(propylaminocarbonyl)benzenesulfonamide.	T.N.Drebushchak,N.V.Chukanov,E.V.Boldyreva	ACTA CRYSTALLOGR.,SECT.E:STRUCT.REP.ONLINE,2006,62,,o4393	Pbcn	1D	[0,1,0]	K02	2C1
BEDMIG02	C10 H13 Cl1 N2 O3 S1	4-chloro-N-(propylaminocarbonyl)benzenesulfonamide.	T.N.Drebushchak,N.V.Chukanov,E.V.Boldyreva	ACTA CRYSTALLOGR.,SECT.C:CRYST.STRUCT.COMMUN.,2007,63,,o355	P21	1D	[0,1,0]	K002	2C1
BEDMIG03	C10 H13 Cl1 N2 O3 S1	4-Chloro-N-((propylamino)-carbonyl)-benzenesulfonamide.	T.N.Drebushchak,N.V.Chukanov,E.V.Boldyreva	ACTA CRYSTALLOGR.,SECT.C:CRYST.STRUCT.COMMUN.,2008,64,,o623	Pbca	1D	[1,0,0]	K002	2C1
BEDMIG04	C10 H13 Cl1 N2 O3 S1	4-Chloro-N-((propylamino)-carbonyl)-benzenesulfonamide.	T.N.Drebushchak,N.V.Chukanov,E.V.Boldyreva	ACTA CRYSTALLOGR.,SECT.C:CRYST.STRUCT.COMMUN.,2008,64,,o623	Pna21	1D	[0,0,1]	K002	2C1
BEDMIG05	C10 H13 Cl1 N2 O3 S1	4-Chloro-N-(propylcarbamoyl)benzenesulfonamide.	T.N.Drebushchak,Y.A.Chesalov,E.V.Boldyreva	ACTA CRYSTALLOGR.,SECT.B:STRUCT.SCI.,2009,65,,770	Pna21	1D	[0,0,1]	K002	2C1
BEDMIG06	C10 H13 Cl1 N2 O3 S1	4-Chloro-N-(propylcarbamoyl)benzenesulfonamide.	T.N.Drebushchak,Y.A.Chesalov,E.V.Boldyreva	ACTA CRYSTALLOGR.,SECT.B:STRUCT.SCI.,2009,65,,770	Pna21	1D	[0,0,1]	K002	2C1
BEDMIG07	C10 H13 Cl1 N2 O3 S1	4-Chloro-N-(propylcarbamoyl)benzenesulfonamide.	T.N.Drebushchak,Y.A.Chesalov,E.V.Boldyreva	ACTA CRYSTALLOGR.,SECT.B:STRUCT.SCI.,2009,65,,770	Pna21	1D	[0,0,1]	K002	2C1
BEDMIG08	C10 H13 Cl1 N2 O3 S1	4-Chloro-N-(propylcarbamoyl)benzenesulfonamide.	T.N.Drebushchak,Y.A.Chesalov,E.V.Boldyreva	ACTA CRYSTALLOGR.,SECT.B:STRUCT.SCI.,2009,65,,770	P212121	1D	[0,0,1]	K002	2C1
BEDMIG09	C10 H13 Cl1 N2 O3 S1	4-Chloro-N-(propylcarbamoyl)benzenesulfonamide.	T.N.Drebushchak,Y.A.Chesalov,E.V.Boldyreva	ACTA CRYSTALLOGR.,SECT.B:STRUCT.SCI.,2009,65,,770	P212121	1D	[0,0,1]	K002	2C1
BEDMIG10	C10 H13 Cl1 N2 O3 S1	4-Chloro-N-(propylcarbamoyl)benzenesulfonamide.	T.N.Drebushchak,Y.A.Chesalov,E.V.Boldyreva	ACTA CRYSTALLOGR.,SECT.B:STRUCT.SCI.,2009,65,,770	P212121	1D	[0,0,1]	K002	2C1
BEGCIZ	C18 H22 N4 O5 S2	N-(2-(2-Methyl-3-(p-nitrobenzyl)-oxy-1-isothioureido)-ethyl)-p-toluenesulfonamide.	Z.Urbanczyk-Lipkowska,J.W.Krajewski,P.Gluzinski,K.Stadnicka	ACTA CRYSTALLOGR.,SECT.B:STRUCT.CRYSTALLOGR.CRYST.CHEM.,1982,38,,971	P-1	0D		B01	1M2-1
BEJJEG	C15 H13 Cl2 N1 O2 S1	N-(1-Chloromethyl-2-chloro-2-phenylethenyl)benzenesulfonamide.	S.Karur,S.R.S.S.Kotti,Xin Xu,J.F.Cannon,A.Headley,Guigen Li	J.AM.CHEM.SOC.,2003,125,,13340	Pbca	0D		B01	1M2-1
BESNUI01	C9 H8 N2 O2 S2	N-(1,3-thiazol-2(3H)-ylidene)benzenesulfonamide.	T.A.Mayer,M.B.Hursthouse,T.L.Threlfall,S.J.Coles	University of Southampton, Crystal Structure Report Archive,2000,,,	P21/n	0D		B01	1M2-1
BEWKUJ04	C11 H11 N3 O2 S1	4-Amino-N-2-pyridinylbenzenesulfonamide.	A.K.Basak,S.Chaudhuri,S.K.Mazumdar	ACTA CRYSTALLOGR.,SECT.C:CRYST.STRUCT.COMMUN.,1984,40,,1848	C2/c	2D	(1,0,0)	G41	SP 2-periodic net (4.8^2)IIa or tts; Shubnikov plane net (3^2.4.3.4)
BEWKUJ11	C11 H11 N3 O2 S1	4-Amino-N-2-pyridinyl-benzenesulfonamide.	I.Bar,J.Bernstein	J.Pharm.Sci.,1985,74,,255	P21/c	3D		G41	sqp; 5/4/t6; sqc13
BEWKUJ15	C11 H11 N3 O2 S1	4-amino-N-(1,2-dihydropyridin-2-ylidene)benzenesulfonamide.	J.Pratt,J.Hutchinson,C.L.K.Stevens	ACTA CRYSTALLOGR.,SECT.C:CRYST.STRUCT.COMMUN.,2011,67,,o487	C2/c	2D	(1,0,0)	G41	SP 2-periodic net (4.8^2)IIa or tts; Shubnikov plane net (3^2.4.3.4)
BEYFER	C15 H18 N2 O2 S1	N-((S)-2-Amino-2-phenylethyl)-4-methylbenzensulfonamide.	A.Hayes,G.Clarkson,M.Wills	TETRAHEDRON:ASYMM.,2004,15,,2079	P212121	2D	(0,0,1)	K4	sql/Shubnikov tetragonal plane net
BIZPIK	C13 H11 Cl1 N2 O3 S1	2-(N-(2-chlorophenyl)carbamoyl)benzenesulfonamide.	W.A.Siddiqui,S.Ahmad,I.U.Khan,H.L.Siddiqui,M.Parvez	ACTA CRYSTALLOGR.,SECT.C:CRYST.STRUCT.COMMUN.,2008,64,,o286	Pna21	2D	(1,0,0)	K4	sql/Shubnikov tetragonal plane net
BIZPOQ	C13 H11 Cl1 N2 O3 S1	2-(N-(4-chlorophenyl)carbamoyl)benzenesulfonamide.	W.A.Siddiqui,S.Ahmad,I.U.Khan,H.L.Siddiqui,M.Parvez	ACTA CRYSTALLOGR.,SECT.C:CRYST.STRUCT.COMMUN.,2008,64,,o286	Pbca	2D	(0,1,0)	K4	sql/Shubnikov tetragonal plane net
BOVBOE	C14 H19 N3 O2 S1	N-(2-Aminoethyl)-5-(dimethylamino)-1-naphthalenesulfonamide.	Shilei Zhang,Bilin Zhao,Zhenhong Su,Xianyou Xia,Yong Zhang	ACTA CRYSTALLOGR.,SECT.E:STRUCT.REP.ONLINE,2009,65,,o1452	Pna21	1D	[0,0,1]	B2	2C1
BOVFIC	C15 H15 N5 O4 S1	4-[2-(1-Acetyl-2-oxopropylidene)hydrazino]-N-(pyrimidin-2-yl)benzenesulfonamide.	P.Rai,S.Upadhyay,M.Nethaji,K.K.Upadhyay	ACTA CRYSTALLOGR.,SECT.E:STRUCT.REP.ONLINE,2009,65,,o1397	P21/n	0D		B01	1M2-1
BPCBZS11	C12 H9 Br1 Cl1 N1 O2 S1	4-Bromo-4'-chlorobenzenesulfonamidobenzene.	T.Gelbrich,M.B.Hursthouse,T.L.Threlfall	ACTA CRYSTALLOGR.,SECT.B:STRUCT.SCI.,2007,63,,621	R-3	0D		B01	1M2-1
BSPRTL10	C9 H9 N1 O3 S2	(S)-\a-(Benzenesulfonamido)-\b-propiothiolactone.	N.Galesic,M.Galesic,E.Coffou	CROAT.CHEM.ACTA,1977,50,,283	P212121	1D	[0,0,1]	B2	2C1
BUDJUG	C18 H19 N1 O4 S1	Ethyl 3-(2-(p-toluenesulfonamido)phenyl)acrylate.	Mei-Fang Jin,Bao-Yong Zhu	ACTA CRYSTALLOGR.,SECT.E:STRUCT.REP.ONLINE,2009,65,,o2312	P-1	0D		B01	1M2-1
BUDYEF	C7 H10 N2 O2 S1	2-Amino-4-methylbenzenesulfonamide.	Shao-Song Qian,Hao Hu,Hong-You Cui	ACTA CRYSTALLOGR.,SECT.E:STRUCT.REP.ONLINE,2009,65,,o2513	P21/c	2D	(1,0,0)	K4	sql/Shubnikov tetragonal plane net
BUDYUV	C13 H11 N1 O3 S1	N-Benzoylbenzenesulfonamide.	B.T.Gowda,S.Foro,P.A.Suchetan,H.Fuess	ACTA CRYSTALLOGR.,SECT.E:STRUCT.REP.ONLINE,2009,65,,o2516	P-1	0D		B01	1M2-1
BUJPAY	C32 H32 N4 O4 S2	4-Methyl-N-((1-(2-(((4-methylphenyl)sulfonyl)amino)ethyl)-4,5-diphenyl-1H-imidazol-2-yl)methyl)benzenesulfonamide.	Zilu Chen,Jing Miao,Zhong Zhang,Fupei Liang,Qiang Wu	J.ORGANOMET.CHEM.,2010,695,,189	P-1	1D	[1,0,0]	K02	2C1
CAGPOR	C32 H20 N2 O6 S2	N^1^,N^3^-bis(9-Oxo-9H-fluoren-2-yl)benzene-1,3-disulfonamide.	J.T.Koivunen,L.Nissinen,J.Kapyla,J.Jokinen,M.Pihlavisto,A.Marjamaki,J.Heino,J.Huuskonen,O.T.Pentikainen	J.AM.CHEM.SOC.,2011,133,,14558	P21/c	1D	[0,0,1]	K21	SP 1-periodic net (4,4)(0,2)
CAYNEW	C15 H11 N3 O4 S1	4-Nitro-N-(8-quinolyl)benzenesulfonamide.	L.E.da Silva,A.C.Joussef,S.Foro,B.Schmidt	ACTA CRYSTALLOGR.,SECT.E:STRUCT.REP.ONLINE,2005,61,,o3778	P21	1D	[1,0,0]	B2	2C1
CAYNOG	C15 H9 Br2 F1 N2 O2 S1	N-(5,7-Dibromo-8-quinolyl)-4-fluorobenzenesulfonamide.	L.E.da Silva,A.C.Joussef,S.Foro,B.Schmidt	ACTA CRYSTALLOGR.,SECT.E:STRUCT.REP.ONLINE,2005,61,,o3782	P21/c	1D	[0,1,0]	B2	2C1
CAZCOW	C26 H40 N2 O4 S4	N,N'-(Dithio-bis(4-methyl-2,3-pentanediyl))-bis(4-methylbenzenesulfonamide).	D.Sureshkumar,S.M.Koutha,S.Chandrasekaran	J.AM.CHEM.SOC.,2005,127,,12760	P-1	0D		B01	1M2-1
CAZDAJ	C11 H15 N1 O2 S3	4-Methyl-N-(3-methyl-1,2-dithiolan-4-yl)benzenesulfonamide.	D.Sureshkumar,S.M.Koutha,S.Chandrasekaran	J.AM.CHEM.SOC.,2005,127,,12760	P21/n	1D	[0,1,0]	B2	2C1
CAZDEN	C12 H17 N1 O2 S2	4-Methyl-N-(3-methyltetrahydro-3-thienyl)benzenesulfonamide.	D.Sureshkumar,S.M.Koutha,S.Chandrasekaran	J.AM.CHEM.SOC.,2005,127,,12760	P21/n	1D	[0,1,0]	B2	2C1
CAZDIR	C17 H23 N1 O3 S2	N-(4,8-Dimethyl-7-oxo-2-thiabicyclo(3.3.1)non-4-yl)-4-methylbenzenesulfonamide.	D.Sureshkumar,S.M.Koutha,S.Chandrasekaran	J.AM.CHEM.SOC.,2005,127,,12760	P21	1D	[0,1,0]	B2	2C1
CAZDOX	C13 H17 N1 O3 S3	N-(4-Hydroxy-6,7-dithiabicyclo(3.2.1)oct-2-yl)-4-methylbenzenesulfonamide.	D.Sureshkumar,S.M.Koutha,S.Chandrasekaran	J.AM.CHEM.SOC.,2005,127,,12760	P-1	1D	[1,0,0]	K21	SP 1-periodic net (4,4)(0,2)
CAZFAL	C17 H23 N1 O4 S2	N-(7-Hydroxy-1,4-dimethyl-8-oxo-2-thiabicyclo(3.2.2)non-4-yl)-4-methylbenzenesulfonamide.	D.Sureshkumar,S.M.Koutha,S.Chandrasekaran	J.AM.CHEM.SOC.,2005,127,,12760	P212121	3D		K4	dia Diamond; 4/6/c1; sqc6
CAZFIT	C18 H22 N2 O4 S4	N,N'-1,2-Dithiane-4,5-diyl-bis(4-methylbenzenesulfonamide).	D.Sureshkumar,S.M.Koutha,S.Chandrasekaran	J.AM.CHEM.SOC.,2005,127,,12760	P212121	2D	(0,0,1)	K4	sql/Shubnikov tetragonal plane net
CEJZEW	C23 H22 N4 O7 S2	5,2'-Anhydro-5-(p-toluenesulfonamido)-1-(3'-O-tosyl-\b-D-arabinofuranosyl)imidazole-4-carbonitrile.	S.Sugio,H.Mizuno,K.Kitamura,M.Ikehara,K.-I.Tomita	ACTA CRYSTALLOGR.,SECT.C:CRYST.STRUCT.COMMUN.,1984,40,,186	P21	1D	[0,1,0]	B2	2C1
CEVBAH	C17 H15 Br2 N3 O3 S1	N-(2,3-dibromo-10-oxo-7,8-dihydro-6H,10H-dipyrrolo[1,2-a:1',2'-d]pyrazin-5-yl)-4-methylbenzenesulfonamide.	M.Zollinger,P.Mayer,T.Lindel	J.ORG.CHEM.,2006,71,,9431	P21/c	1D	[0,0,1]	B2	2C1
CEXQOM	C11 H8 Br1 N1 O4 S2	2-(2-bromothiophene-5-sulfonamido)benzoic acid.	Xiao-Wei Yan,Mao-Lin Hu,Jing Xiong	ACTA CRYSTALLOGR.,SECT.E:STRUCT.REP.ONLINE,2007,63,,o678	C2/c	0D		B01	1M2-1
CICPEK	C7 H8 Cl1 N1 O2 S1	N-(3-Chlorophenyl)methanesulfonamide.	B.T.Gowda,S.Foro,H.Fuess	ACTA CRYSTALLOGR.,SECT.E:STRUCT.REP.ONLINE,2007,63,,o2569	C2/c	1D	[0,0,1]	B2	2C1
CICPIO	C7 H8 F1 N1 O2 S1	N-(4-Fluorophenyl)methanesulfonamide.	B.T.Gowda,S.Foro,H.Fuess	ACTA CRYSTALLOGR.,SECT.E:STRUCT.REP.ONLINE,2007,63,,o2570	P21/c	1D	[0,1,0]	B2	2C1
CICQEL	C7 H8 Br1 N1 O2 S1	N-(4-Bromophenyl)methanesulfonamide.	B.T.Gowda,S.Foro,H.Fuess	ACTA CRYSTALLOGR.,SECT.E:STRUCT.REP.ONLINE,2007,63,,o2597	P21/c	1D	[0,1,0]	B2	2C1
CIKJAI	C13 H10 Br2 N2 O3 S1	4-(3,5-Dibromo-2-hydroxybenzylideneamino)benzenesulfonamide.	Yu.M.Chumakov,V.I.Tsapkov,G.Bocelli,B.Ya.Antosyak,S.A.Palomares-Sanchez,R.S.Ortiz,A.P.Gulya	Zh.Strukt.Khim.(Russ.)(J.Struct.Chem.),2006,47,,933	P21/n	2D	(1,0,1)	K21	hcb; Shubnikov hexagonal plane net/(6,3)
CIKJEM	C16 H11 Br2 N3 O3 S2	4-(3,5-Dibromo-2-hydroxybenzylideneamino)-N-(1,3-thiazol-2-yl)benzenesulfonamide.	Yu.M.Chumakov,V.I.Tsapkov,G.Bocelli,B.Ya.Antosyak,S.A.Palomares-Sanchez,R.S.Ortiz,A.P.Gulya	Zh.Strukt.Khim.(Russ.)(J.Struct.Chem.),2006,47,,933	P21/c	0D		B01	1M2-1
CIMJOX	C22 H24 N2 O7 S2	Ethyl2-methyl-5-oxo-4-(p-toluenesulfonamido)-1-tosyl-2,5-dihydro-pyrrole-2-carboxylate.	L.Dupont,O.Dideberg,J.C.Jamoulle	ACTA CRYSTALLOGR.,SECT.C:CRYST.STRUCT.COMMUN.,1984,40,,1472	P21/c	0D		B01	1M2-1
CIQHEQ	C15 H13 N1 O4 S1	4-Methyl-N-(3-oxo-1,3-dihydroisobenzofuran-1-yl)benzenesulfonamide.	M.Odabasoglu,O.Buyukgungor	ACTA CRYSTALLOGR.,SECT.E:STRUCT.REP.ONLINE,2007,63,,o4730	Pca21	1D	[0,0,1]	B2	2C1
CIZBOD01	C19 H18 N2 O2 S1	N-(1-(1H-Pyrrol-2-yl)-2-phenylethylidene)-4-methylbenzenesulfonamide.	R.E.Marsh	ACTA CRYSTALLOGR.,SECT.B:STRUCT.SCI.,2009,65,,782	P-1	0D		B01	1M2-1
CONQUS	C26 H28 N3 O7 S1	1-(4-(sulfonamide)phenyl)-3-(2,4-dimethoxyphenyl)-5-(3,4,5-trimethoxyphenyl)pyrazoline.	I.G.Rathish,K.Javed,S.Ahmad,S.Bano,M.S.Alam,K.K.Pillai,S.Singh,V.Bagchi	BIOORG.MED.CHEM.LETT.,2009,19,,255	P-1	1D	[1,0,0]	P03	SP 1-periodic net (4,4)(0,2)
COTJIF	C22 H28 N4 O3 S2	N-((2-(2-(Diethylamino)ethyl)-9-methoxy-2H-thiochromeno(4,3,2-cd)indazol-5-yl)methyl)methanesulfonamide.	M.J.Heeg	PRIVATE COMMUNICATION,2009,,,	P-1	0D		B01	1M2-1
COYVER	C8 H8 N4 O2 S2	2-(5-Amino-1,3,4-thiadiazol-2-yl)-benzenesulfonamide.	E.Foresti,L.Riva di Sanseverino,P.Sabatino	ACTA CRYSTALLOGR.,SECT.C:CRYST.STRUCT.COMMUN.,1985,41,,240	P21/n	3D		G41	bnn hexagonal BN; 5/4/h5; sqc12
CUDDEL	C13 H11 Br1 N2 O3 S1	4-[(E)-(5-Bromo-2-hydroxyphenyl)methylideneamino]benzenesulfonamide.	Z.H.Chohan,H.A.Shad,M.N.Tahir	ACTA CRYSTALLOGR.,SECT.E:STRUCT.REP.ONLINE,2009,65,,o2426	P21	1D	[0,1,0]	B2	2C1
CUGXAE	C29 H27 N3 O2 S3	anti-N-(1-(4-(Dicyanomethylene)-3,4-dihydro-2H-thiochromen-3-yl)-3-(phenylsulfanyl)propyl)-2,4-dimethylbenzenesulfonamide.	Xiao-Feng Xiong,Zhi-Jun Jia,Wei Du,Kun Jiang,Tian-Yu Liu,Ying-Chun Chen	CHEM.COMMUN.,2009,,,6994	P212121	1D	[1,0,0]	B2	2C1
CUGXEI	C29 H27 N3 O2 S3	syn-N-(1-(4-(Dicyanomethylene)-3,4-dihydro-2H-thiochromen-3-yl)-3-(phenylsulfanyl)propyl)-2,4-dimethylbenzenesulfonamide.	Xiao-Feng Xiong,Zhi-Jun Jia,Wei Du,Kun Jiang,Tian-Yu Liu,Ying-Chun Chen	CHEM.COMMUN.,2009,,,6994	P21	1D	[0,1,0]	B2	2C1
CURPIP	C26 H26 Br1 N3 O2 S1	4-Bromo-N-(2-(4-phenylpiperazin-1-yl)-1,2-dihydronaphthalen-1-yl)benzenesulfonamide.	Yong-hwan Cho,V.Zunic,H.Senboku,M.Olsen,M.Lautens	J.AM.CHEM.SOC.,2006,128,,6837	P21	1D	[0,1,0]	B2	2C1
CUSXEU	C10 H11 N3 O3 S1	N-(4-Methyl-1,2,5-oxadiazol-3-yl)-1-phenylmethanesulfonamide.	Dae-Seop Shin,D.Masciocchi,A.Gelain,S.Villa,D.Barlocco,F.Meneghetti,A.Pedretti,Young-Min Han,Dong Cho Han,Byoung-Mog Kwon,L.Legnani,L.Toma	MedChemComm,2010,1,,156	P-1	0D		B01	1M2-1
CUTWEU	C28 H23 N1 O3 S1	4-Methyl-N-(2-(3-oxo-1,3-diphenylprop-1-en-1-yl)phenyl)benzenesulfonamide.	P.Kothandaraman,Weidong Rao,Shi Jia Foo,P.W.H.Chan	Angew.Chem.,Int.Ed.,2010,49,,4619	P-1	0D		B01	1M2-1
CYSPTL10	C10 H8 N2 O3 S2	(S)-\a-(p-Cyanobenzenesulfonamide)-\b-propiothiolactone.	I.Matijasic,G.D.Andreetti,P.Sgarabotto,A.Bezjak,D.Fles	CROAT.CHEM.ACTA,1987,60,,285	P21	1D	[0,1,0]	B2	2C1
DACBEQ	C26 H24 N2 O5 S1	N-(2-((1,3-Dioxo-1,3-dihydro-2H-isoindol-2-yl)methyl)-3-oxo-1-phenylbutyl)-4-methylbenzenesulfonamide.	Siang-en Syu,Yu-Ting Lee,Yeong-Jiunn Jang,Wenwei Lin	J.ORG.CHEM.,2011,76,,2888	P-1	0D		B01	1M2-1
DACCAN	C23 H26 N2 O6 S1	N-(2-((2,5-Dioxopyrrolidin-1-yl)methyl)-1-(4-methoxyphenyl)-3-oxobutyl)-4-methylbenzenesulfonamide.	Siang-en Syu,Yu-Ting Lee,Yeong-Jiunn Jang,Wenwei Lin	J.ORG.CHEM.,2011,76,,2888	C2/c	0D		B01	1M2-1
DACCER	C22 H24 N2 O5 S1	N-(2-((2,5-Dioxopyrrolidin-1-yl)methyl)-3-oxo-1-phenylbutyl)-4-methylbenzenesulfonamide.	Siang-en Syu,Yu-Ting Lee,Yeong-Jiunn Jang,Wenwei Lin	J.ORG.CHEM.,2011,76,,2888	Pcab	1D	[1,0,0]	B2	2C1
DACCIV	C22 H23 N3 O7 S1	N-(2-((2,5-Dioxopyrrolidin-1-yl)methyl)-1-(4-nitrophenyl)-3-oxobutyl)-4-methylbenzenesulfonamide.	Siang-en Syu,Yu-Ting Lee,Yeong-Jiunn Jang,Wenwei Lin	J.ORG.CHEM.,2011,76,,2888	P-1	0D		B01	1M2-1
DACCOB	C22 H23 Br1 N2 O5 S1	N-(1-(4-Bromophenyl)-2-((2,5-dioxopyrrolidin-1-yl)methyl)-3-oxobutyl)-4-methylbenzenesulfonamide.	Siang-en Syu,Yu-Ting Lee,Yeong-Jiunn Jang,Wenwei Lin	J.ORG.CHEM.,2011,76,,2888	P-1	0D		B01	1M2-1
DACCUH	C26 H23 N3 O7 S1	N-(2-((1,3-Dioxo-1,3-dihydro-2H-isoindol-2-yl)methyl)-1-(4-nitrophenyl)-3-oxobutyl)-4-methylbenzenesulfonamide.	Siang-en Syu,Yu-Ting Lee,Yeong-Jiunn Jang,Wenwei Lin	J.ORG.CHEM.,2011,76,,2888	P-1	0D		B01	1M2-1
DAMRAL	C41 H44 N4 O6 S2	1,7-(bis(6-Methoxy-8-(4-toluenesulfonamido)quinol-2-yl))heptane.	M.C.Kimber,S.F.Lincoln,A.D.Ward,E.R.T.Tiekink	Z.KRISTALLOGR.-NEW CRYST.STRUCT.,2004,219,,216	P21/c	0D		B01	1M2-1
DAYWOQ	C13 H12 N2 O4 S1	4-Methyl-N-(4-nitrophenyl)benzenesulfonamide.	Jun-De Xing,Tao Zeng	ACTA CRYSTALLOGR.,SECT.E:STRUCT.REP.ONLINE,2005,61,,o4318	P21/c	1D	[0,1,0]	B2	2C1
DAYWUW	C16 H17 N1 O4 S1	N-(4-(Ethoxycarbonyl)phenyl)-p-tolylsulfonamide.	Jun-De Xing,Zhi-Hong Nan	ACTA CRYSTALLOGR.,SECT.E:STRUCT.REP.ONLINE,2005,61,,o4320	P21/n	1D	[0,1,0]	B2	2C1
DEFKOP	C30 H28 Br1 N1 O3 S3	S-Phenyl2-((4-bromophenyl)(4-methylphenylsulfonamido)methyl)-3-(phenylthio)butanthioate.	Yong-Lin Shi,Min Shi	TETRAHEDRON,2006,62,,461	P-1	0D		B01	1M2-1
DEFZEU	C14 H21 N3 O2 S1	(3-(2-(Dimethylamino)ethyl)-1H-indol-5-yl)-N-methylmethanesulfonamide.	K.Ravikumar,B.Sridhar,H.Krishnan	ACTA CRYSTALLOGR.,SECT.E:STRUCT.REP.ONLINE,2006,62,,o1086	P21/n	2D	(0,0,1)	K4	sql/Shubnikov tetragonal plane net
DERTEA	C10 H11 N1 O2 S1	4-Methyl-N-(prop-2-ynyl)benzenesulfonamide.	A.S.K.Hashmi,J.P.Weyrauch,E.Kurpejovic,T.M.Frost,B.Miehlich,W.Frey,J.W.Bats	Chem.-Eur.J.,2006,12,,5806	P212121	1D	[1,0,0]	B2	2C1
DERTIE	C12 H13 N1 O3 S1	4-Methyl-N-((furan-2-yl)methyl)benzenesulfonamide.	A.S.K.Hashmi,J.P.Weyrauch,E.Kurpejovic,T.M.Frost,B.Miehlich,W.Frey,J.W.Bats	Chem.-Eur.J.,2006,12,,5806	P21/c	1D	[0,0,1]	B2	2C1
DERTOK	C13 H15 N1 O3 S1	4-Methyl-N-((5-methylfuran-2-yl)methyl)benzenesulfonamide.	A.S.K.Hashmi,J.P.Weyrauch,E.Kurpejovic,T.M.Frost,B.Miehlich,W.Frey,J.W.Bats	Chem.-Eur.J.,2006,12,,5806	P21	1D	[0,1,0]	B2	2C1
DERXAA	C16 H19 N1 O4 S1	N-(2,4-Dimethoxybenzyl)-4-methylbenzenesulfonamide.	A.S.K.Hashmi,J.P.Weyrauch,E.Kurpejovic,T.M.Frost,B.Miehlich,W.Frey,J.W.Bats	Chem.-Eur.J.,2006,12,,5806	C2/c	0D		B01	1M2-1
DIBBUL	C17 H14 F3 N3 O2 S1	4-(5-(4-Methylphenyl)-3-(trifluoromethyl)-1H-pyazol-1-yl)benezenesulfonamide.	R.V.Dev,K.S.Rekha,K.Vyas,S.B.Mohanti,P.R.Kumar,G.O.Reddy	ACTA CRYSTALLOGR.,SECT.C:CRYST.STRUCT.COMMUN.,1999,55,,9900161	P-1	1D	[0,0,1]	K21	SP 1-periodic net (4,4)(0,2)
DIFFUU	C19 H23 N1 O2 S2	(S,S)-N-(2-Phenylthiocyclohexyl)-p-toluenesulfonamide.	Zhi-Bin Luo,Xue-Long Hou,Li-Xin Dai	TETRAHEDRON:ASYMM.,2007,18,,443	P212121	1D	[0,1,0]	B2	2C1
DILHAI	C14 H15 N1 O2 S1	N-(2,4-Dimethylphenyl)benzenesulfonamide.	Jun Chang,Tie-Jun Zhang,Chang-Xiao Liu,Xue-Ming Zhao	ACTA CRYSTALLOGR.,SECT.E:STRUCT.REP.ONLINE,2007,63,,o3670	P21/n	0D		B01	1M2-1
DIWREH	C12 H17 N1 O4 S2	4-(Methylsulfanyl)-2-(p-toluenesulfonamido)butanoic acid.	Li Wang,Zheng Liu,Yong Liao Wang	ACTA CRYSTALLOGR.,SECT.E:STRUCT.REP.ONLINE,2008,64,,o706	C2/c	0D		B01	1M2-1
DIWTEJ	C19 H18 N2 O4 S2	2-Amino-N-(4-methylphenylsulfonyl)-N-phenylbenzenesulfonamide.	Zu-Wei Song	ACTA CRYSTALLOGR.,SECT.E:STRUCT.REP.ONLINE,2008,64,,o744	P21/c	0D		B01	1M2-1
DIYVOX	C21 H25 N1 O4 S1	(Z)-N-(1-(4-methoxyphenyl)-4,4-dimethyl-3-oxopent-1-en-2-yl)-4-methylbenzenesulfonamide.	Yun Sun,Xiaozhao Wang,Xiufang Zheng,Kang Zhao	SYNLETT,2008,,,861	P-1	0D		B01	1M2-1
DOGPIZ	C21 H22 N2 O4 S2	(-)-(2R,3R,4R)-2-Hydroxy-3-methyl-N,4-diphenyl-4-(thiophene-2-sulfonamido)butanamide.	Gang Lu,H.Morimoto,S.Matsunaga,M.Shibasaki	Angew.Chem.,Int.Ed.,2008,47,,6847	P212121	1D	[0,1,0]	B2	2C1
DUCVED	C6 H6 Cl1 N1 O2 S1	2-Chlorobenzenesulfonamide.	B.T.Gowda,S.Foro,K.Shakuntala,H.Fuess	ACTA CRYSTALLOGR.,SECT.E:STRUCT.REP.ONLINE,2009,65,,o2144	Cc	2D	(0,1,0)	K4	sql/Shubnikov tetragonal plane net
DUJKAV	C13 H10 Cl1 N1 O3 S1	N-(4-Chlorobenzoyl)benzenesulfonamide.	P.A.Suchetan,B.T.Gowda,S.Foro,H.Fuess	ACTA CRYSTALLOGR.,SECT.E:STRUCT.REP.ONLINE,2009,65,,o3156	P-1	1D	[1,0,0]	B2	2C1
DUJLAW	C14 H15 N1 O2 S1	N-(3,5-Dimethylphenyl)benzenesulfonamide.	P.G.Nirmala,B.T.Gowda,S.Foro,H.Fuess	ACTA CRYSTALLOGR.,SECT.E:STRUCT.REP.ONLINE,2009,65,,o3225	P21/c	1D	[0,1,0]	B2	2C1
DUJSUX	C16 H19 N1 O2 S1	N-(3,5-Dimethylphenyl)-2,4-dimethylbenzenesulfonamide.	B.T.Gowda,S.Foro,P.G.Nirmala,H.Fuess	ACTA CRYSTALLOGR.,SECT.E:STRUCT.REP.ONLINE,2009,65,,o3275	C2/c	0D		B01	1M2-1
DUMQEI	C13 H12 Cl1 N1 O2 S1	N-(3-Chlorophenyl)-4-methylbenzenesulfonamide.	B.T.Gowda,S.Foro,P.G.Nirmala,H.Fuess	ACTA CRYSTALLOGR.,SECT.E:STRUCT.REP.ONLINE,2010,66,,o278	P21/c	0D		B01	1M2-1
DUMVAJ	C15 H16 N2 O5 S2	N-[4-(p-Toluenesulfonamido)phenylsulfonyl]acetamide.	M.Ashfaq,I.U.Khan,M.N.Arshad,H.Ahmad,M.N.Asghar	ACTA CRYSTALLOGR.,SECT.E:STRUCT.REP.ONLINE,2010,66,,o299	P21/n	2D	(1,0,1)	K21	hcb; Shubnikov hexagonal plane net/(6,3)
DUNLEE	C11 H11 Cl1 N4 O3 S1	4-Amino-N-(6-chloro-5-methoxypyrimidin-4-yl)benzenesulfonamide.	H.-K.Fun,J.H.Goh,C.S.C.Kumar,H.S.Yathirajan,B.Narayana	ACTA CRYSTALLOGR.,SECT.E:STRUCT.REP.ONLINE,2010,66,,o372	P21/c	0D		B01	1M2-1
DUNYAN	C15 H15 N1 O3 S1	2-Methyl-N-(3-methylbenzoyl)benzenesulfonamide.	B.T.Gowda,S.Foro,P.A.Suchetan,H.Fuess	ACTA CRYSTALLOGR.,SECT.E:STRUCT.REP.ONLINE,2010,66,,o433	C2/c	0D		B01	1M2-1
DUSPEN	C11 H15 N3 O3 S1	N-(2-(3-Methyl-1-oxo-1,2-dihydropyrrolo[1,2-a]pyrazin-2-yl)ethyl)methanesulfonamide.	S.T.Khan,P.Yu,S.Chantrapromma,N.Afza,A.Nelofar	ACTA CRYSTALLOGR.,SECT.E:STRUCT.REP.ONLINE,2010,66,,o1957	P21/c	0D		B01	1M2-1
DUSSOA	C14 H15 N1 O2 S1	N-(3,4-Dimethylphenyl)benzenesulfonamide.	P.John,S.Sharif,I.U.Khan,S.Khizar,E.R.T.Tiekink	ACTA CRYSTALLOGR.,SECT.E:STRUCT.REP.ONLINE,2010,66,,o1983	C2/c	1D	[0,1,0]	B2	2C1
DUSTOB	C12 H16 Br1 N1 O2 S1	4-Bromo-N-cyclohexylbenzenesulfonamide.	P.John,F.Anwar,I.U.Khan,S.Sharif,E.R.T.Tiekink	ACTA CRYSTALLOGR.,SECT.E:STRUCT.REP.ONLINE,2010,66,,o1989	P21/c	1D	[0,1,0]	B2	2C1
DUSWUK	C13 H11 Cl2 N1 O2 S1	4-Chloro-N-(4-chlorophenyl)-2-methylbenzenesulfonamide.	B.T.Gowda,S.Foro,P.G.Nirmala,H.Fuess	ACTA CRYSTALLOGR.,SECT.E:STRUCT.REP.ONLINE,2010,66,,o2000	P21/c	1D	[0,1,0]	B2	2C1
EDESEM	C9 H13 N1 O2 S1	N-(2,3-Dimethylphenyl)methanesulfonamide.	B.T.Gowda,S.Foro,H.Fuess	ACTA CRYSTALLOGR.,SECT.E:STRUCT.REP.ONLINE,2007,63,,o3014	P212121	1D	[1,0,0]	B2	2C1
EDESIQ	C9 H13 N1 O2 S1	N-(2,4-Dimethylphenyl)methanesulfonamide.	B.T.Gowda,S.Foro,H.Fuess	ACTA CRYSTALLOGR.,SECT.E:STRUCT.REP.ONLINE,2007,63,,o3015	P21/n	0D		B01	1M2-1
EDUXEH	C17 H17 N3 O3 S1	N-(1,5-Dimethyl-3-oxo-2-phenyl-2,3-dihydro-1H-pyrazol-4-yl)benzenesulfonamide.	Yun-Fa Zheng,Chun-Niu Zhang,Ming-Hua Yang	ACTA CRYSTALLOGR.,SECT.E:STRUCT.REP.ONLINE,2007,63,,o3293	P-1	0D		B01	1M2-1
EFAWUD	C12 H12 N2 O3 S1	N-(3-phenoxy-4-pyridinio)methanesulfonamidate.	C.Michaux,C.Charlier,F.Julemont,J.-M.Dogne,X.de Leval,B.Norberg,B.Pirotte,F.Durant	ACTA CRYSTALLOGR.,SECT.C:CRYST.STRUCT.COMMUN.,2002,58,,o88	Pbca	1D	[0,1,0]	B2	2C1
EGIDEE	C21 H20 Br1 N3 O4 S1	N-((1R*,2R*)-2-(6-Bromopyridin-2-yl)-1-(4-nitrophenyl)propyl)-2-methylbenzenesulfonamide.	V.Komanduri,C.D.Grant,M.J.Krische	J.AM.CHEM.SOC.,2008,130,,12592	P21/n	1D	[0,1,0]	B2	2C1
EGOXED	C21 H22 Cl1 N3 O6 S1	4-Chloro-N-(2-(3-(4-methoxyphenyl)-5-methyl-4,6-dioxo-hexahydro-pyrrolo(3,4-d)isoxazol-2-yl)ethyl)benzenesulfonamide.	H.A.Dondas,J.E.Cummins,R.Grigg,M.Thornton-Pett	TETRAHEDRON,2001,57,,7951	P21/n	0D		B01	1M2-1
EHEGUU	C16 H16 N2 O3 S1	N-(2,3,8,8a-Tetrahydro-3aH-furo[2,3-b]indol-3a-yl)benzenesulfonamide.	T.Benkovics,I.A.Guzei,T.P.Yoon	Angew.Chem.,Int.Ed.,2010,49,,9153	P21	1D	[0,1,0]	B2	2C1
ERODEV	C16 H17 N3 O3 S1	N-(7-Ethoxy-1H-indazol-4-yl)-4-methylbenzenesulfonamide.	N.Abbassi,E.M.Rakib,H.Zouihri	ACTA CRYSTALLOGR.,SECT.E:STRUCT.REP.ONLINE,2011,67,,o1354	P21/c	1D	[0,1,0]	K21	SP 1-periodic net (4,4)(0,2)
EROMII	C14 H14 Cl1 N1 O2 S1	4-Chloro-N-(2,6-dimethylphenyl)benzenesulfonamide.	K.Shakuntala,S.Foro,B.T.Gowda	ACTA CRYSTALLOGR.,SECT.E:STRUCT.REP.ONLINE,2011,67,,o1401	P212121	1D	[0,1,0]	B2	2C1
ETABUW	C16 H10 F9 N3 O3 S1	(N-((E)-2-(4-Hydroxyphenyl)diazenyl)phenyl)-1-perfluorobutanesulfonamide.	X.A.Mico,M.Richter,S.Schwarz,J.Strahle,T.Ziegler,L.R.Subramanian	Z.KRISTALLOGR.-NEW CRYST.STRUCT.,2003,218,,547	P-1	0D		B01	1M2-1
ETONAC	C13 H13 N1 O3 S1	N-Methyl-2-phenoxybenzenesulfonamide.	C.Glidewell,J.N.Low,J.M.S.Skakle,J.L.Wardell	ACTA CRYSTALLOGR.,SECT.C:CRYST.STRUCT.COMMUN.,2004,60,,o364	P21	1D	[1,0,0]	B2	2C1
EVAGUE	C20 H19 Cl1 N4 O4 S1	(E,E)-4-(4-(3-(4-Chloroanilino)-1-hydroxybut-2-enylidene)-3-methyl-5-oxo-4,5-dihydro-1H-pyrazol-1-yl)benzenesulfonamide.	A.M.Asiri,H.M.Faidallah,S.W.Ng	ACTA CRYSTALLOGR.,SECT.E:STRUCT.REP.ONLINE,2011,67,,o1590	P21/c	2D	(0,1,0)	G22	sql/Shubnikov tetragonal plane net
EVAWAA	C13 H12 N4 O3 S2	4-(2,7-Dimethyl-4-oxo-1,3-thiazolo[4,5-d]pyridazin-5-yl)benzenesulfonamide.	A.M.Asiri,H.M.Faidallah,S.W.Ng	ACTA CRYSTALLOGR.,SECT.E:STRUCT.REP.ONLINE,2011,67,,o1665	P21/c	2D	(1,0,0)	K21	hcb; Shubnikov hexagonal plane net/(6,3)
EVEJOF	C15 H18 N2 O4 S2	N-[3-(Benzenesulfonamido)propyl]benzenesulfonamide.	T.A.Sheikh,I.U.Khan,W.T.A.Harrison,Ejaz	ACTA CRYSTALLOGR.,SECT.E:STRUCT.REP.ONLINE,2011,67,,o1737	Pbca	2D	(0,0,1)	K4	sql/Shubnikov tetragonal plane net
EVOFAX	C14 H14 Cl1 N1 O2 S1	N-(4-Chlorophenyl)-2,4-dimethylbenzenesulfonamide.	K.Shakuntala,S.Foro,B.T.Gowda	ACTA CRYSTALLOGR.,SECT.E:STRUCT.REP.ONLINE,2011,67,,o2160	P21/c	1D	[0,1,0]	B2	2C1
EVOJAB	C14 H14 Cl1 N1 O2 S1	N-(3-Chlorophenyl)-2,4-dimethylbenzenesulfonamide.	K.Shakuntala,S.Foro,B.T.Gowda	ACTA CRYSTALLOGR.,SECT.E:STRUCT.REP.ONLINE,2011,67,,o2178	P21/c	1D	[0,1,0]	B2	2C1
EVOSIS	C8 H9 N5 O2 S1	N-[Amino(azido)methylidene]-4-methylbenzenesulfonamide.	A.Mahmood,I.U.Khan,M.N.Arshad,J.Ahmed	ACTA CRYSTALLOGR.,SECT.E:STRUCT.REP.ONLINE,2011,67,,o2140	P-1	1D	[0,1,0]	K21	SP 1-periodic net (4,4)(0,2)
EWUHAF	C8 H8 F3 N3 O4 S2	3,4-Dihydro-6-(trifluoromethyl)-2H-1,2,4-benzothiadiazine-7-sulfonamide1,1-dioxide.	A.J.Florence,B.Baumgartner,C.Weston,N.Shankland,A.R.Kennedy,K.Shankland,W.I.F.David	J.Pharm.Sci.,2003,92,,1930	P21	2D	(0,0,1)	G22	sql/Shubnikov tetragonal plane net
EXALUK	C15 H12 Br1 N1 O2 S1	4-Bromo-N-(3-phenylprop-2-ynyl)benzenesulfonamide.	A.S.K.Hashmi,P.Haufe,A.R.Nass,J.W.Bats	ADV.SYNTH.CATAL.,2004,346,,421	Cc	1D	[1,0,0]	B2	2C1
EZALIB	C29 H33 Br1 N2 O4 S1	N-(1-(2-Bromo-4,5-dimethoxyphenyl)-1-cyano-2-phenylheptan-3-yl)-4-methylbenzenesulfonamide.	M.K.Ghorai,Y.Nanaji,A.K.Yadav	Org.Lett.,2011,13,,4256	P-1	0D		B01	1M2-1
EZATUV	C30 H23 N3 O2 S1	N-(1,5-Diphenylpyrazolo[5,1-a]isoquinolin-2-yl)-4-methylbenzenesulfonamide.	Shaoyu Li,Yong Luo,Jie Wu	Org.Lett.,2011,13,,4312	P-1	0D		B01	1M2-1
EZEVIP	C29 H24 N2 O2 S1	5-(Dimethylamino)-N-(pyren-1-ylmethyl)naphthalene-1-sulfonamide.	V.Chandrasekhar,M.D.Pandey,S.K.Maurya,P.Sen,D.Goswami	Chem.Asian J.,2011,6,,2246	C2/c	0D		B01	1M2-1
FAMZOJ	C12 H21 N1 O6 S2	syn-6-Methanesulfonamido-3-methyl-2-oxa-1-adamantyl methanesulfonate.	P.Camps,E.Gomez,D.Munoz-Torrero,M.Font-Bardia,X.Solans	TETRAHEDRON,2003,59,,4143	Pbca	1D	[0,1,0]	B2	2C1
FAVBEK	C25 H22 Cl2 N2 O5 S1	N-(2-chloro-2-(2-chlorophenyl)-1-[(2-oxo-4-phenyl-1,3-oxazolidin-3-yl)carbonyl]ethyl)-4-methylbenzenesulfonamide.	Xin Xu,S.R.S.S.Kotti,Junying Liu,J.F.Cannon,A.D.Headley,Guigen Li	Org.Lett.,2004,6,,4881	P21	1D	[1,0,0]	B2	2C1
FAWFOA	C31 H36 N2 O4 S1	N-(1-(4-Isobutyl-2-(2-naphthyl)-5-oxo-4,5-dihydro-1,3-oxazol-4-yl)pent-4-en-1-yl)-4-isopropylbenzenesulfonamide.	Wen-Quan Zhang,Ling-Feng Cheng,Jie Yu,Liu-Zhu Gong	Angew.Chem.,Int.Ed.,2012,51,,4085	P212121	1D	[1,0,0]	B2	2C1
FAXBUB01	C13 H13 N1 O2 S1	4-Methyl-N-phenylbenzenesulfonamide.	B.T.Gowda,S.Foro,P.G.Nirmala,H.Terao,H.Fuess	ACTA CRYSTALLOGR.,SECT.E:STRUCT.REP.ONLINE,2009,65,,o1219	P21/c	0D		B01	1M2-1
FAXZIO	C16 H14 N2 O3 S1	4-(5-Methyl-3-phenylisoxazol-4-yl)benzenesulfonamide.	S.M.M.Sony,P.Charles,M.N.Ponnuswamy,H.S.Yathirajan	ACTA CRYSTALLOGR.,SECT.E:STRUCT.REP.ONLINE,2005,61,,o108	Pbca	1D	[0,1,0]	B2	2C1
FEDLAC	C18 H16 N2 O4 S2	N,N'-(o-Phenylene)dibenzenesulfonamide.	J.C.Bryan,J.M.Rosenberg,K.Kavallieratos	ACTA CRYSTALLOGR.,SECT.E:STRUCT.REP.ONLINE,2005,61,,o396	P21/c	1D	[1,0,0]	K02	2C1
FIJJUD	C17 H11 N3 O4 S2	4-Phthalimido-N-(1,3-thiazol-2-yl)benzenesulfonamide.	M.Ghosh,A.K.Basak,P.N.Roy,S.K.Mazumdar,B.Sheldrick	ACTA CRYSTALLOGR.,SECT.C:CRYST.STRUCT.COMMUN.,1987,43,,732	P21/c	0D		B01	1M2-1
FIJJUD01	C17 H11 N3 O4 S2	4-(1,3-Dioxo-1,3-dihydro-2H-isoindol-2-yl)-N-(1,3-thiazol-2(3H)-ylidene)benzenesulfonamide.	T.Gelbrich	PRIVATE COMMUNICATION,2012,,,	P21/c	0D		B01	1M2-1
FIRGOD	C7 H8 Cl1 N1 O2 S1	p-chloroaniline N-methanesulfonamide.	J.R.Hanson,P.B.Hitchcock	J.CHEM.RES.,2004,,,642	P21/c	1D	[0,1,0]	B2	2C1
FIRHAQ	C9 H13 N1 O2 S1	2,5-Dimethylaniline N-methanesulfonamide.	J.R.Hanson,P.B.Hitchcock	J.CHEM.RES.,2004,,,642	P21/c	0D		B01	1M2-1
FIRHEU	C9 H13 N1 O2 S1	2,6-Dimethylaniline N-methanesulfonamide.	J.R.Hanson,P.B.Hitchcock	J.CHEM.RES.,2004,,,642	P212121	1D	[1,0,0]	B2	2C1
FIRHUK	C9 H11 N3 O6 S1	2,6-Dinitro-3,4-dimethylaniline N-methanesulfonamide.	J.R.Hanson,P.B.Hitchcock	J.CHEM.RES.,2004,,,642	P21/n	1D	[1,0,0]	T02	2C1
FIRJAS	C9 H12 N2 O3 S1	4-Aminoacetanilide N-methanesulfonamide.	J.R.Hanson,P.B.Hitchcock	J.CHEM.RES.,2004,,,642	P212121	1D	[1,0,0]	K02	2C1
FIRMUP	C20 H20 Cl1 N3 O5 S1	4-Chloro-N-(2-(5-methyl-4,6-dioxo-3-phenylhexahydropyrrolo(3,4-d)isoxazol-2-yl)ethyl)benzenesulfonamide.	H.A.Dondas,H.Arslan,M.Thornton-Pett	Z.KRISTALLOGR.-NEW CRYST.STRUCT.,2004,219,,363	Fdd2	0D		B01	1M2-1
FIZTUE	C10 H14 F6 N2 O5 S2	(1S,2S)-N-acetyl-1,2-bis(trifluoromethanesulfonamide)cyclohexane.	S.Arseniyadis,A.Valleix,A.Wagner,C.Mioskowski	Angew.Chem.,Int.Ed.,2004,43,,3314	P212121	1D	[0,1,0]	B2	2C1
FOMZOX	C10 H9 Cl1 N4 O2 S1	4-Amino-N-(6-chloropyridazin-3-yl)benzenesulfonamide.	Yan-Shu Tan,Zhen-Feng Chen,Hong Liang,Yong Zhang	ACTA CRYSTALLOGR.,SECT.E:STRUCT.REP.ONLINE,2005,61,,o1842	P21/n	1D	[1,0,1]	B2	2C1
FOXCOL	C14 H13 Cl2 N1 O2 S1	N-(3,4-Dichlorophenyl)-2,4-dimethylbenzenesulfonamide.	B.T.Gowda,S.Foro,P.G.Nirmala,H.Fuess	ACTA CRYSTALLOGR.,SECT.E:STRUCT.REP.ONLINE,2009,65,,o1976	P21/c	1D	[0,1,0]	B2	2C1
FUGVIN	C13 H10 Cl1 N1 O3 S1	N-(3-Chlorobenzoyl)benzenesulfonamide.	B.T.Gowda,S.Foro,P.A.Suchetan,H.Fuess	ACTA CRYSTALLOGR.,SECT.E:STRUCT.REP.ONLINE,2009,65,,o2750	C2/c	0D		B01	1M2-1
FUGXOV	C14 H15 N1 O2 S1	N-(2,5-Dimethylphenyl)benzenesulfonamide.	B.T.Gowda,S.Foro,P.G.Nirmala,H.Fuess	ACTA CRYSTALLOGR.,SECT.E:STRUCT.REP.ONLINE,2009,65,,o2763	P21/n	0D		B01	1M2-1
FUJFIA	C17 H25 N1 O2 S1	4-Methyl-N-(1,7,7-trimethylbicyclo[2.2.1]hept-2-yl)benzenesulfonamide.	X.Giner,C.Najera	SYNLETT,2009,,,3211	P21/c	0D		B01	1M2-1
FUQWIY	C19 H31 N1 O7 S1 Si1	N-(1-(3,4-Dihydroxy-5-oxotetrahydro-2-furanyl)-2-(dimethyl-t-butylsiloxy)ethyl)-4-methylbenzenesulfonamide.	J.Robertson,E.Abdulmalek	TETRAHEDRON LETT.,2009,50,,3516	P21/c	1D	[1,0,0]	K21	SP 1-periodic net (4,4)(0,2)
FUZRAU	C17 H23 N1 O2 S2	N-Benzyl-1-(7,7-dimethyl-2-thioxobicyclo[2.2.1]hept-1-yl)methanesulfonamide.	A.Kozakiewicz,M.Ullrich,M.Weniak,A.Wojtczak	J.Mol.Catal.A:Chem.,2010,326,,128	P212121	1D	[1,0,0]	B2	2C1
GABCIX	C24 H20 Br1 N1 O3 S1	N-((4-Bromophenyl)(2-hydroxy-1-naphthyl)methyl)-4-methylbenzenesulfonamide.	Liang-Feng Niu,Yang-Chun Xin,Ren-Lin Wang,Fan Jiang,Peng-Fei Xu,Xin-Ping Hui	SYNLETT,2010,,,765	P212121	1D	[1,0,0]	B2	2C1
GACBOD	C15 H23 N1 O3 S1	N-(2-(4-Hydroxybut-2-en-1-yl)-3-methylphenyl)-2-methylpropane-2-sulfonamide.	H.Yamamoto,E.Ho,K.Namba,H.Imagawa,M.Nishizawa	Chem.-Eur.J.,2010,16,,11271	P-1	1D	[0,1,0]	K21	SP 1-periodic net (4,4)(0,2)
GACYAM	C20 H25 N3 O5 S1	N-[(4R)-4-(4-Methoxyphenyl)-3-[2-(4-methoxyphenyl)ethyl]-2-oxo-imidazolidin-1-yl]methanesulfonamide.	B.E.Blass,A.Fensome,E.Trybulski,R.Magolda,S.J.Gardell,Kun Liu,M.Samuel,I.Feingold,C.Huselton,C.M.Jackson,L.Djandjighian,D.Ho,J.Hennan,J.M.Janusz	J.Med.Chem.,2009,52,,6531	P21	1D	[0,1,0]	B2	2C1
GAFPEJ	C13 H10 N2 O2 S2	N-(1,3-Thiazol-2(3H)-ylidene)naphthalene-2-sulfonamide.	R.Cejudo-Marin,G.Alzuet,S.Ferrer,J.Borras,A.Castineiras,E.Monzani,L.Casella	INORG.CHEM.,2004,43,,6805	P21/c	0D		B01	1M2-1
GAFPUZ	C10 H10 N2 O2 S2	4-Methyl-N-(1,3-thiazol-2(3H)-ylidene)benzene-2-sulfonamide.	R.Cejudo-Marin,G.Alzuet,S.Ferrer,J.Borras,A.Castineiras,E.Monzani,L.Casella	INORG.CHEM.,2004,43,,6805	P21/a	0D		B01	1M2-1
GALMEM	C26 H16 Cl2 N2 O5 S1	3',6'-Dichloro-3-oxo-N-(2-pyridylmethyl)-3H-spiro(2-benzofuran-1,9'-xanthene)-6-sulfonamide.	C.C.Woodroofe,Mi Hee Lim,Weiming Bu,S.J.Lippard	TETRAHEDRON,2005,61,,3097	P-1	0D		B01	1M2-1
GAPJUE	C13 H9 Cl1 N2 O5 S1	N-(2-Chlorobenzoyl)-2-nitrobenzenesulfonamide.	P.A.Suchetan,S.Foro,B.T.Gowda	ACTA CRYSTALLOGR.,SECT.E:STRUCT.REP.ONLINE,2012,68,,o274	Pbca	0D		B01	1M2-1
GAPVUQ	C13 H10 N2 O5 S1	N-Benzoyl-2-nitrobenzenesulfonamide.	P.A.Suchetan,S.Foro,B.T.Gowda,B.Nirmala	ACTA CRYSTALLOGR.,SECT.E:STRUCT.REP.ONLINE,2012,68,,o339	Pbca	0D		B01	1M2-1
GAQQAS	C15 H21 N3 O3 S1	N-(Hexahydrocyclopenta[c]pyrrol-2(1H)-ylcarbamoyl)-2-methylbenzenesulfonamide.	Di Wu,Xueyuan Wang,Dongying Pang,Wei Su,Yan Sun	ACTA CRYSTALLOGR.,SECT.E:STRUCT.REP.ONLINE,2012,68,,o446	P21/c	1D	[1,0,0]	K02	2C1
GAQTOJ	C12 H16 Cl1 N1 O2 S1	4-Chloro-N-cyclohexylbenzenesulfonamide.	S.Sharif,S.Y.Mughal,I.U.Khan,M.Akkurt,M.H.Khan	ACTA CRYSTALLOGR.,SECT.E:STRUCT.REP.ONLINE,2012,68,,o468	P21/c	1D	[0,1,0]	B2	2C1
GAWHES	C23 H19 N3 O4 S1	3-((4-(4-Methylphenylsulfonamido)benzoyl)methylidene)-3,4-dihydroquinoxalin-2(1H)-one.	Yi-Sheng Xu,Cheng-Chu Zeng,Xue-Mei Li,Ru-Gang Zhong	ACTA CRYSTALLOGR.,SECT.E:STRUCT.REP.ONLINE,2005,61,,o3802	P-1	0D		B01	1M2-1
GEJJOV	C11 H10 Cl1 N3 O2 S1	N-(6-Chloropyridazin-3-yl)-4-methylbenzenesulfonamide.	Hoong-Kun Fun,Shu-Feng Zhang,Zhen-Feng Chen,Hong Liang,S.Chantrapromma	ACTA CRYSTALLOGR.,SECT.E:STRUCT.REP.ONLINE,2006,62,,o2178	C2/c	1D	[0,1,0]	B2	2C1
GERCAH	C12 H21 N3 O3 S1	(3-(N-Diethylaminoethyl)sulfonamido-S)-4-methoxypyridine.	M.Sbit,L.Dupont,O.Dideberg,J.F.Liegeois,J.Delarge	ACTA CRYSTALLOGR.,SECT.C:CRYST.STRUCT.COMMUN.,1988,44,,907	P-1	1D	[0,1,0]	B2	2C1
GEWXIP	C16 H18 Cl1 N1 O2 S1	N-((-)-1R,2R-1-Chloro-1-phenyl-2-propyl)-p-toluenesulfonamide.	A.Flores-Parra,P.Suarez-Moreno,S.A.Sanchez-Ruiz,M.Tlahuextl,J.Jaen-Gaspar,H.Tlahuext,R.Salas-Coronado,A.Cruz,H.Noth,R.Contreras	TETRAHEDRON:ASYMM.,1998,9,,1661	P21	1D	[0,1,0]	B2	2C1
GEWXUB	C17 H21 N1 O3 S1	N-((+)-1S,2S-1-Hydroxy-1-phenyl-2-propyl)-N-methyl-p-toluenesulfonamide.	A.Flores-Parra,P.Suarez-Moreno,S.A.Sanchez-Ruiz,M.Tlahuextl,J.Jaen-Gaspar,H.Tlahuext,R.Salas-Coronado,A.Cruz,H.Noth,R.Contreras	TETRAHEDRON:ASYMM.,1998,9,,1661	P21	1D	[1,0,0]	B2	2C1
GEWZIR	C16 H19 N1 O3 S1	N((+)-1S,2R-1-Hydroxy-1-phenyl-2-propyl)-p-toluenesulfonamide.	A.Flores-Parra,P.Suarez-Moreno,S.A.Sanchez-Ruiz,M.Tlahuextl,J.Jaen-Gaspar,H.Tlahuext,R.Salas-Coronado,A.Cruz,H.Noth,R.Contreras	TETRAHEDRON:ASYMM.,1998,9,,1661	P21/c	1D	[0,1,0]	K02	2C1
GEXCAN	C16 H18 Cl1 N1 O2 S1	N-((+)-1R,2R-1-Chloro-1-phenyl-2-propyl)-p-toluenesulfonamide.	A.Flores-Parra,P.Suarez-Moreno,S.A.Sanchez-Ruiz,M.Tlahuextl,J.Jaen-Gaspar,H.Tlahuext,R.Salas-Coronado,A.Cruz,H.Noth,R.Contreras	TETRAHEDRON:ASYMM.,1998,9,,1661	P21	1D	[0,1,0]	B2	2C1
GILWII	C18 H19 N1 O4 S1	anti-N-(3-acetyl-3,4-dihydro-2H-chromen-4-yl)-4-methylbenzenesulfonamide.	Ming-Juan Qi,Min Shi	TETRAHEDRON,2007,63,,10415	C2/c	0D		B01	1M2-1
GIQRUT	C21 H33 N5 O4 S1	1-Cyclohexylamino-1-((4'-cyclo-octylamino)pyrid-3'-ylsulfonamido)-2-nitroethylene.	B.Masereel,J.Wouters,L.Pochet,D.Lambert	J.Med.Chem.,1998,41,,3239	P21/c	1D	[0,1,0]	B2	2C1
GOLDUH	C17 H16 N2 O4 S2	Ethyl 3-(4-methylbenzenesulfonamido)thieno(2,3-b)pyridine-2-carboxylate.	Wen-qin Zhang,Ren-lin Zheng,Hang Song,Sheng-Yong Yang,Luo-Ting Yu	ACTA CRYSTALLOGR.,SECT.E:STRUCT.REP.ONLINE,2009,65,,o257	Pbca	0D		B01	1M2-1
GUFQED01	C15 H25 N1 O2 S1	2,4,6-Tri-isopropylbenzenesulfonamide.	J.C.Clark,M.L.McLaughlin,F.R.Fronczek	ACTA CRYSTALLOGR.,SECT.E:STRUCT.REP.ONLINE,2003,59,,o2005	P21/c	0D		B01	1M2-1
GUHVEL	C18 H27 N1 O3 S1	N-((1R,3R,4S,6S)-4-Hydroxy-4,7,7-trimethylbicyclo(4.1.0)heptan-3-yl)-N-4-dimethylbenzenesulfonamide.	K.Z.Laczkowski,A.Kmieciak,A.Kozakiewicz	TETRAHEDRON:ASYMM.,2009,20,,1487	P212121	1D	[0,1,0]	B2	2C1
GUVQOE	C19 H18 N4 O5 S1	N-(5,6-Dimethoxypyrimidin-4-yl)-4-((2-hydroxybenzylidene)amino)benzenesulfonamide.	Yun-Zhi Tang,He-Rui Wen,Jian Zhang,Yu-Hui Tan	Jiegou Huaxue(Chin.J.Struct.Chem.),2010,29,,69	P21/c	0D		B01	1M2-1
GUWPAQ	C11 H13 N1 O4 S1	4-Methyl-N-(3-methyl-2-oxooxetan-3-yl)benzenesulfonamide.	C.Lauf,C.Bruhn,H.Frauenrath	Z.KRISTALLOGR.-NEW CRYST.STRUCT.,2010,225,,137	P212121	1D	[1,0,0]	B2	2C1
HABSOS	C10 H10 Cl1 N3 O2 S1	5-Chloro-3-methyl-1-phenyl-4-pyrazolesulfonamide.	J.Iulek,J.Zukerman-Schpector,E.J.Barreiro,A.C.C.Freitas	ACTA CRYSTALLOGR.,SECT.C:CRYST.STRUCT.COMMUN.,1993,49,,1015	Cc	3D		K4	dia Diamond; 4/6/c1; sqc6
HAHTIU	C37 H46 Br1 N1 O5 S2 Si1	N-(4-Bromo-2-(t-butyl(diphenyl)siloxy)-1-(phenylsulfonyl)oct-3-yl)-4-methylbenzenesulfonamide.	S.Raghavan,Ch.N.Kumar,K.A.Tony,S.R.Reddy,K.R.Kumar	TETRAHEDRON LETT.,2004,45,,7231	P21/n	0D		B01	1M2-1
HAMTAR	C39 H42 Br1 N1 O5 S2 Si1	N-((1S,2S,3R)-2-Bromo-3-(t-butyldiphenylsilyloxy)-1-phenyl-4-(phenylsulfonyl)butyl)-4-methylbenzenesulfonamide.	K.Ravikumar,G.Y.S.K.Swamy,S.Raghavan,Ch.Naveenkumar	ACTA CRYSTALLOGR.,SECT.E:STRUCT.REP.ONLINE,2004,60,,o2290	P21/n	0D		B01	1M2-1
HCSBTZ02	C7 H8 Cl1 N3 O4 S2	6-Chloro-3,4-dihydro-2H-1,2,4-benzothiadiazine-7-sulfonamide-1,1-dioxide.	C.K.Leech,F.P.A.Fabbiani,K.Shankland,W.I.F.David,R.Ibberson	ACTA CRYSTALLOGR.,SECT.B:STRUCT.SCI.,2008,64,,101	P21/c	3D		H61	vcm; 7/3/o12; hex-7-Cmce-1
HCSBTZ03	C7 H8 Cl1 N3 O4 S2	6-Chloro-3,4-dihydro-2H-1,2,4-benzothiadiazine-7-sulfonamide 1,1-dioxide.	C.K.Leech,F.P.A.Fabbiani,K.Shankland,W.I.F.David,R.Ibberson	ACTA CRYSTALLOGR.,SECT.B:STRUCT.SCI.,2008,64,,101	P21	2D	(0,0,1)	G22	sql/Shubnikov tetragonal plane net
HCSBTZ04	C7 H8 Cl1 N3 O4 S2	6-Chloro-3,4-dihydro-2H-1,2,4-benzothiadiazine-7-sulfonamide 1,1-dioxide.	C.K.Leech,F.P.A.Fabbiani,K.Shankland,W.I.F.David,R.Ibberson	ACTA CRYSTALLOGR.,SECT.B:STRUCT.SCI.,2008,64,,101	P21/c	3D		H61	vcm; 7/3/o12; hex-7-Cmce-1
HEFTAO	C12 H10 Cl1 N1 O2 S1	N-(2-Chlorophenyl)benzenesulfonamide.	G.L.Perlovich,V.V.Tkachev,K.-J.Schaper,O.A.Raevsky	ACTA CRYSTALLOGR.,SECT.E:STRUCT.REP.ONLINE,2006,62,,o780	P21/a	1D	[0,1,0]	B2	2C1
HIGBAA	C18 H19 N1 O2 S1	N-(2-(1-3H-Indenyl)ethyl)-p-toluenesulfonamide.	G.J.Gainsford,C.Lensink	ACTA CRYSTALLOGR.,SECT.C:CRYST.STRUCT.COMMUN.,1996,52,,472	P21/n	0D		B01	1M2-1
HIXSOW	C16 H20 N2 O4 S2	N-(4-((Benzenesulfonyl)amino)butyl)benzenesulfonamide.	A.Linden,S.Bienz	ACTA CRYSTALLOGR.,SECT.C:CRYST.STRUCT.COMMUN.,1999,55,,9900046	P21/n	2D	(1,0,-1)	K4	sql/Shubnikov tetragonal plane net
HODWED01	C14 H15 N1 O2 S1	N-(2,6-Dimethylphenyl)benzenesulfonamide.	P.Sanphui,B.Sarma,A.Nangia	CRYST.GROWTH DES.,2010,10,,4550	P21/n	1D	[1,0,0]	B2	2C1
HODWED02	C14 H15 N1 O2 S1	N-(2,6-Dimethylphenyl)benzenesulfonamide.	P.Sanphui,B.Sarma,A.Nangia	CRYST.GROWTH DES.,2010,10,,4550	P21/c	0D		B01	1M2-1
HODWIH	C13 H13 N1 O2 S1	N-(2-Methylphenyl)benzenesulfonamide.	B.T.Gowda,S.Foro,K.S.Babitha,H.Fuess	ACTA CRYSTALLOGR.,SECT.E:STRUCT.REP.ONLINE,2008,64,,o1692	P212121	1D	[1,0,0]	B2	2C1
HOLGAR	C14 H15 N1 O2 S1	N-(2,3-Dimethylphenyl)benzenesulfonamide.	B.T.Gowda,S.Foro,K.S.Babitha,H.Fuess	ACTA CRYSTALLOGR.,SECT.E:STRUCT.REP.ONLINE,2009,65,,o366	P212121	1D	[1,0,0]	B2	2C1
HOYBIH	C17 H21 N3 O4 S1	N-(3,4-Dimethyl-2,5-dioxo-2,5,7,8,9,9a-hexahydro-1H-pyrrolo[1,2-a][1,3]diazepin-1-yl)-4-methylbenzenesulfonamide.	K.L.Cubbage,A.J.Orr-Ewing,K.I.Booker-Milburn	Angew.Chem.,Int.Ed.,2009,48,,2514	P-1	0D		B01	1M2-1
HUCSUU	C13 H12 N2 O2 S1	4-(Benzylideneamino)benzenesulfonamide.	B.T.Loughrey,M.L.Williams,P.C.Healy	ACTA CRYSTALLOGR.,SECT.E:STRUCT.REP.ONLINE,2009,65,,o2087	P21/c	2D	(1,0,0)	K21	hcb; Shubnikov hexagonal plane net/(6,3)
HUDLAU	C16 H13 N3 O3 S2	N-(2,3-Dihydro-1,3-thiazol-2-ylidene)-4-((2-hydroxybenzylidene)amino)benzenesulfonamide.	Xin-Li Zhang	ACTA CRYSTALLOGR.,SECT.E:STRUCT.REP.ONLINE,2009,65,,o2274	P21/c	0D		B01	1M2-1
HUDWEJ	C14 H14 Cl1 N1 O2 S1	4-Chloro-2-methyl-N-(3-methylphenyl)benzenesulfonamide.	B.T.Gowda,S.Foro,P.G.Nirmala,H.Fuess	ACTA CRYSTALLOGR.,SECT.E:STRUCT.REP.ONLINE,2010,66,,o14	P21/c	0D		B01	1M2-1
HUDWIN	C15 H17 N1 O2 S1	N-(2,5-Dimethylphenyl)-4-methylbenzenesulfonamide.	B.T.Gowda,S.Foro,P.G.Nirmala,H.Fuess	ACTA CRYSTALLOGR.,SECT.E:STRUCT.REP.ONLINE,2010,66,,o15	P-1	0D		B01	1M2-1
HUFVOU	C7 H8 N2 O4 S1	2-Methyl-5-nitrobenzenesulfonamide.	M.Zia-ur-Rehman,I.U.Khan,N.Naz,M.N.Arshad	ACTA CRYSTALLOGR.,SECT.E:STRUCT.REP.ONLINE,2010,66,,o136	P212121	2D	(0,0,1)	T4	sql/Shubnikov tetragonal plane net
HUFVUZ	C18 H14 N4 O8 S2	N,N'-m-Phenylenebis(4-nitrobenzenesulfonamide).	E.Heigel,H.Bock	ACTA CRYSTALLOGR.,SECT.E:STRUCT.REP.ONLINE,2001,57,,o239	P21/n	2D	(1,0,1)	K4	sql/Shubnikov tetragonal plane net
HUFXAI	C15 H17 N1 O2 S1	N-(3,5-Dimethylphenyl)-4-methylbenzenesulfonamide.	B.T.Gowda,S.Foro,P.G.Nirmala,H.Fuess	ACTA CRYSTALLOGR.,SECT.E:STRUCT.REP.ONLINE,2010,66,,o144	P-1	0D		B01	1M2-1
HUGFOF	C13 H12 Cl1 N1 O2 S1	N-(2-Chlorophenyl)-4-methylbenzenesulfonamide.	B.T.Gowda,S.Foro,P.G.Nirmala,H.Fuess	ACTA CRYSTALLOGR.,SECT.E:STRUCT.REP.ONLINE,2010,66,,o188	P21/n	0D		B01	1M2-1
HUKDOH	C24 H34 N2 O3 S1 Si1	N-((3-(Diisopropyl(phenyl)silyl)-5-oxopyrrolidin-2-yl)methyl)-4-methylbenzenesulfonamide.	N.M.Leonard,K.A.Woerpel	J.ORG.CHEM.,2009,74,,6915	Pbca	1D	[0,1,0]	T02	2C1
HUNXIY	C14 H16 N2 O2 S1	4-Amino-N-(4-ethylphenyl)benzenesulfonamide.	G.L.Perlovich,V.V.Tkachev,N.N.Strakhova,V.P.Kazachenko,T.V.Volkova,O.V.Surov,K.-J.Schaper,O.A.Raevsky	J.Pharm.Sci.,2009,98,,4738	P21/c	1D	[0,1,0]	B2	2C1
HUNXOE	C13 H14 N2 O3 S1	4-Amino-N-(4-methoxyphenyl)benzenesulfonamide.	G.L.Perlovich,V.V.Tkachev,N.N.Strakhova,V.P.Kazachenko,T.V.Volkova,O.V.Surov,K.-J.Schaper,O.A.Raevsky	J.Pharm.Sci.,2009,98,,4738	P21/c	1D	[0,1,0]	K4	SP 1-periodic net (3,6)(1,2)
HUNXUK	C13 H13 Cl1 N2 O2 S1	4-Amino-N-(5-chloro-2-methylphenyl)benzenesulfonamide.	G.L.Perlovich,V.V.Tkachev,N.N.Strakhova,V.P.Kazachenko,T.V.Volkova,O.V.Surov,K.-J.Schaper,O.A.Raevsky	J.Pharm.Sci.,2009,98,,4738	P21/c	2D	(1,0,0)	G22	sql/Shubnikov tetragonal plane net
HUVXAY	C16 H17 Br1 N2 O4 S1	N-(2-Bromo-2-nitro-1-phenylpropyl)-4-methylbenzenesulfonamide.	Sanjun Zhi,Guanghui An,Hao Sun,Jianlin Han,Guigen Li,Yi Pan	TETRAHEDRON LETT.,2010,51,,2745	Pbca	1D	[1,0,0]	B2	2C1
IBOFAH	C26 H34 N4 O2 S3	6-(3-(5-Dimethylaminonaphthylsulfonamido)propyl)-6-aza-3,9-dithia-(2,6)-pyridina-cyclodecaphane.	A.J.Blake,A.Bencini,C.Caltagirone,G.De Filippo,L.S.Dolci,A.Garau,F.Isaia,V.Lippolis,P.Mariani,L.Prodi,M.Montalti,N.Zaccheroni,C.Wilson	DALTON TRANS.,2004,,,2771	P21/n	0D		B01	1M2-1
ICINIT	C30 H41 N1 O3 S1 Si1	N-(4-(5-((t-Butyl(dimethyl)silyl)oxy)-2-phenylpentyl)phenyl)-4-methylbenzenesulfonamide.	A.Saxena,Hon Wai Lam	Chemical Science,2011,2,,2326	P212121	1D	[1,0,0]	B2	2C1
ICOPOG	C10 H19 N1 O2 S1	N-((1R*,2R*,5S*)-Bicyclo(3.1.0)hexan-2-yl)-2-methylpropane-2-sulfonamide.	D.M.Hodgson,P.G.Humphreys,J.G.Ward	Org.Lett.,2006,8,,995	P21/n	0D		B01	1M2-1
IDIMOY	C14 H11 N3 O4 S1	4-(2-oxido-4-phenyl[1,2,5]oxadiazol-3-yl)benzenesulfonamide.	E.Del Grosso,D.Boschi,L.Lazzarato,C.Cena,A.Di Stilo,R.Fruttero,S.Moro,A.Gasco	Chem.Biodiversity,2005,2,,886	P21/c	2D	(1,0,0)	K21	hcb; Shubnikov hexagonal plane net/(6,3)
IDIXEZ	C12 H9 Cl2 N1 O2 S1	N-(2,3-Dichlorophenyl)benzenesulfonamide.	V.V.Tkachev,K.-J.Schaper,N.N.Strakhova,V.P.Kazachenko	ACTA CRYSTALLOGR.,SECT.E:STRUCT.REP.ONLINE,2006,62,,o2514	P21/c	1D	[0,1,0]	B2	2C1
IDUSUV	C17 H24 F3 N1 O5 S1	(3R,4S)-(+)-N-(3-Hydroxy-2,2-dimethyl-6-(4,4,4-trifluorobutoxy)chroman-4-yl)-N-methylmethanesulfonamide.	U.Gerlach,J.Brendel,H.-J.Lang,E.F.Paulus,K.Weidmann,A.Bruggemann,A.E.Busch,H.Suessbrich,M.Bleich,R.Greger	J.Med.Chem.,2001,44,,3831	C2	1D	[0,1,0]	B2	2C1
IPUFOP	C26 H27 Br1 N3 O7 S2	N-(1-(3-Bromo-1-((4-methylphenyl)sulfonyl)-1H-indol-4-yl)-3-hydroxy-3-methylbutyl)-2-(hydroxy(oxido)-\l^5^-azanyl)benzenesulfonamide.	D.C.Behenna,S.Krishnan,B.M.Stoltz	TETRAHEDRON LETT.,2011,52,,2152	P212121	1D	[0,1,0]	B2	2C1
IXEWAJ	C20 H26 N2 O4 S2	1,2-bis(p-Toluenesulfonamido)cyclohexane.	M.Nieger,W.Josten,F.Vogtle	PRIVATE COMMUNICATION,2004,,,	Pcca	1D	[0,0,1]	K02	2C1
IYAVOU	C19 H22 N2 O4 S1	N-(2-(5-Methoxy-1-methyl-2-oxo-2,3-dihydro-1H-indol-3-yl)ethyl)-4-methylbenzenesulfonamide.	O.Lozano,G.Blessley,T.M.del Campo,A.L.Thompson,G.T.Giuffredi,M.Bettati,M.Walker,R.Borman,V.Gouverneur	Angew.Chem.,Int.Ed.,2011,50,,8105	P-1	0D		B01	1M2-1
JAZZOZ10	C10 H14 N6 O6 S1	2-Amino-9-(\b-D-ribofuranosyl)-9H-purine-6-sulfonamide.	S.B.Larson,N.B.Hanna,G.R.Revankar,R.K.Robins	ACTA CRYSTALLOGR.,SECT.C:CRYST.STRUCT.COMMUN.,1990,46,,512	P21	3D		N24	pcu alpha-Po primitive cubic; 6/4/c1; sqc1
JECQUD	C21 H19 N1 O3 S1	N-(2-Oxo-1,2-diphenylethyl)-4-toluenesulfonamide.	G.Mloston,M.Celeda,A.Swiatek,M.Kagi,H.Heimgartner	POL.J.CHEM.,1998,72,,1907	P21/n	0D		B01	1M2-1
JEHWUO	C6 H7 N1 O3 S1	N-(Hydroxy)benzenesulfonamide.	J.N.Scholz,P.S.Engel,C.Glidewell,K.H.Whitmire	TETRAHEDRON,1989,45,,7695	Pna21	2D	(1,0,0)	K4	sql/Shubnikov tetragonal plane net
JEHXAV	C12 H11 N1 O5 S2	N-(Hydroxy)-N-(phenylsulfonyl)benzenesulfonamide.	J.N.Scholz,P.S.Engel,C.Glidewell,K.H.Whitmire	TETRAHEDRON,1989,45,,7695	P21/n	0D		B01	1M2-1
JEHXEZ	C12 H11 N1 O5 S2	N-((Phenylsulfonyl)oxy)benzenesulfonamide.	J.N.Scholz,P.S.Engel,C.Glidewell,K.H.Whitmire	TETRAHEDRON,1989,45,,7695	P21/a	1D	[1,0,0]	T02	2C1
JOGVUX	C33 H41 N1 O3 S1	4-Methyl-N-(2-((R)-phenyl((2S,4aS,10aS)-1,1,4a-trimethyl-1,2,3,4,4a,9,10,10a-octahydrophenanthren-2-yl)methoxy)ethyl)benzenesulfonamide.	Yu-Jun Zhao,Teck-Peng Loh	J.AM.CHEM.SOC.,2008,130,,10024	C2/c	0D		B01	1M2-1
KABCAT	C12 H15 Cl2 N1 O2 S1	2,5-Dichloro-N-cyclohexylbenzenesulfonamide.	I.U.Khan,S.Sharif,S.Batool,A.M.Mumtaz,E.R.T.Tiekink	ACTA CRYSTALLOGR.,SECT.E:STRUCT.REP.ONLINE,2010,66,,o2641	Cc	1D	[0,0,1]	B2	2C1
KABGOK	C32 H29 N1 O4 S1	anti-N-(2,4-Dibenzoyl-1-phenylpent-4-enyl)-4-methylbenzenesulfonamide.	Min Shi,Yong-Mei Xu	J.ORG.CHEM.,2003,68,,4784	P21/c	1D	[0,0,1]	B2	2C1
KABGUR	C11 H12 N4 O3 S1	4-Amino-N-(3-methoxypyrazin-2-yl)benzenesulfonamide.	B.Bruni,S.A.Coran,G.Bartolucci,M.Di Vaira	ACTA CRYSTALLOGR.,SECT.E:STRUCT.REP.ONLINE,2010,66,,o2663	Pbca	2D	(0,0,1)	P6	hxl/Shubnikov plane net (3,6)
KAFWUL	C13 H7 F6 N5 O2 S1	5-Methyl-7-(trifluoromethyl)-N-(2,3,4-trifluorophenyl)[1,2,4]triazolo[1,5-c]pyrimidine-2-sulfonamide.	Chao-Nan Chen,Qiong Chen,Yu-Chao Liu,Xiao-Lei Zhu,Cong-Wei Niu,Zhen Xi,Guang-Fu Yang	BIOORG.MED.CHEM.,2010,18,,4897	P21/c	0D		B01	1M2-1
KAPCEJ	C15 H23 N1 O4 S1	5-Hydroxy-2,2-dimethyl-4-(p-toluenesulfonamido)-3-hexanone.	I.Vencato,Y.P.Mascarenhas,R.A.Pilli,M.I.H.Agostini	ACTA CRYSTALLOGR.,SECT.C:CRYST.STRUCT.COMMUN.,1989,45,,1174	Cc	1D	[0,0,1]	K02	2C1
KARKAR	C21 H21 F1 N2 O3 S2	4-Fluoro-N-(3-hydroxy-1-phenyl-4-(pyridin-2-ylsulfanyl)butan-2-yl)benzenesulfonamide.	W.T.Vellasco Junior,G.P.Guedes,T.R.A.Vasconcelos,M.G.F.Vaz,M.V.N.de Souza,A.U.Krettli,L.G.Krettli,A.C.C.Aguiar,C.R.B.Gomes,W.Cunico	EUR.J.MED.CHEM.,2011,46,,5688	P21	1D	[0,1,0]	B2	2C1
KASXIM	C26 H21 N3 O5 S1	4-Amino-N-(5-methylisoxazol-3-yl)-N-((4-oxo-2-phenyl-4H-1-benzopyran-6-yl)methyl)benzenesulfonamide.	S.Ozbey,A.Akbas,G.Ayhan-Kilcigil,R.Ertan	ACTA CRYSTALLOGR.,SECT.C:CRYST.STRUCT.COMMUN.,2005,61,,o559	P21/c	1D	[0,0,1]	K02	2C1
KEPDEP	C23 H19 N3 O5 S1	3-(2-oxo-2-(4-methoxyphenylsulfonamidophenyl)ethylidene)-3,4-dihydro-1H-quinoxaline-2-one.	Xue-Mei Li,Cheng-Chu Zeng,Yi-sheng Xu,Hong Yan,Da-wei Zheng,Ru-Gang Zhong	J.Chem.Cryst.,2006,36,,357	P-1	0D		B01	1M2-1
KIFZUV	C10 H13 N1 O4 S2	6-Methylthiochroman-7-sulfonamide 1,1-dioxide.	R.Tanaka,N.Hirayama	Anal.Sci.:X-Ray Struct.Anal.Online,2007,23,,x119	Pbca	1D	[1,0,0]	K02	2C1
KIHMIY	C18 H18 N2 O2 S2	N-(3-Cyano-2-((4-methylphenyl)sulfanyl)prop-2-en-1-yl)-4-methylbenzenesulfonamide.	Young Tak Lee,Soo Young Choi,Young Keun Chung	TETRAHEDRON LETT.,2007,48,,5673	P21/c	0D		B01	1M2-1
KIJBUB	C17 H18 Br1 N1 O2 S1	(E)-4-Bromo-N-(4-phenylpent-3-enyl)benzene-1-sulfonamide.	Wen-Jian Shi,Yanyun Liu,P.Butti,A.Togni	ADV.SYNTH.CATAL.,2007,349,,1619	P21/n	1D	[1,0,0]	B2	2C1
KIXHEF	C15 H15 Cl1 N2 O3 S1	4-(2-((5-Chloro-2-hydroxybenzylidene)amino)ethyl)benzenesulfonamide.	Z.H.Chohan,H.A.Shad,M.N.Tahir,I.U.Khan	ACTA CRYSTALLOGR.,SECT.E:STRUCT.REP.ONLINE,2008,64,,o725	C2/c	0D		B01	1M2-1
KIXPIQ	C15 H11 N1 O4 S1	3-(4-Oxo-4H-1-benzopyran-2-yl)benzenesulfonamide.	E.Kendi,S.Ozbey,O.Bozdag,R.Ertan	ACTA CRYSTALLOGR.,SECT.C:CRYST.STRUCT.COMMUN.,2000,56,,457	P-1	1D	[1,0,0]	T21	SP 1-periodic net (4,4)(0,2)
KOLHUP	C20 H21 F1 N2 O2 S1	(S)-N-(3-(1-Cyclopropyl-1-(4-fluorophenyl)ethyl)-1H-indol-7-yl)methanesulfonamide.	M.G.Bell,D.L.Gernert,T.A.Grese,M.D.Belvo,P.S.Borromeo,S.A.Kelley,J.H.Kennedy,S.P.Kolis,P.A.Lander,R.Richey,V.S.Sharp,G.A.Stephenson,J.D.Williams,H.Yu,K.M.Zimmerman,M.I.Steinberg,P.K.Jadhav	J.Med.Chem.,2007,50,,6443	P212121	1D	[1,0,0]	K02	2C1
KUMKEJ	C29 H25 Br1 N2 O3 S1	N-((S)-((3S)-3-(4-Bromobenzyl)-2-oxo-2,3-dihydro-1H-indol-3-yl)(phenyl)methyl)-4-methylbenzenesulfonamide unknown solvate.	Liang Cheng,Li Liu,Han Jia,Dong Wang,Yong-Jun Chen	J.ORG.CHEM.,2009,74,,4650	P43212	1D	[1,0,0];[0,1,0]	K02	2C1
KUSVEZ	C7 H9 N1 O2 S1	p-Methylbenzene sulfonamide.	S.Vijay-Kumar,S.E.Senadhi,L.M.Rao	Z.KRISTALLOGR.,1992,202,,1	P21/n	2D	(0,1,0)	K4	sql/Shubnikov tetragonal plane net
KUSVOK	C14 H15 N1 O2 S1	4-Methyl-N-(4-methylphenyl)benzenesulfonamide.	I.U.Khan,S.Sharif,M.Akkurt,A.Sajjad,J.Ahmad	ACTA CRYSTALLOGR.,SECT.E:STRUCT.REP.ONLINE,2010,66,,o786	P-1	0D		B01	1M2-1
KUSXEC	C13 H10 Cl1 N1 O3 S1	N-Benzoyl-2-chlorobenzenesulfonamide.	B.T.Gowda,S.Foro,P.A.Suchetan,H.Fuess	ACTA CRYSTALLOGR.,SECT.E:STRUCT.REP.ONLINE,2010,66,,o794	P-1	0D		B01	1M2-1
KUVHUF	C15 H17 N1 O2 S1	2,4-Dimethyl-N-(3-methylphenyl)benzenesulfonamide.	P.G.Nirmala,B.T.Gowda,S.Foro,H.Fuess	ACTA CRYSTALLOGR.,SECT.E:STRUCT.REP.ONLINE,2010,66,,o989	P21/c	1D	[0,0,1]	B2	2C1
KUZTEF	C11 H14 N2 O6 S1	(2S)-3-Carbamoyl-2-(4-methoxybenzenesulfonamido)propanoic acid.	H.Mubashar-ur-Rehman,I.U.Khan,M.N.Arshad,K.T.Holman	ACTA CRYSTALLOGR.,SECT.E:STRUCT.REP.ONLINE,2010,66,,o2596	P21	2D	(0,0,1)	H202	sql/Shubnikov tetragonal plane net
KUZWIM	C13 H11 N3 O5 S1	4-((2-Hydroxy-5-nitrobenzylidene)amino)benzenesulfonamide.	Yi-Han Tan,Siang Guan Teoh,Wan-Sin Loh,Hoong-Kun Fun	ACTA CRYSTALLOGR.,SECT.E:STRUCT.REP.ONLINE,2010,66,,o2610	P21/c	2D	(0,1,0)	K4	sql/Shubnikov tetragonal plane net
LAKRIA	C14 H19 N1 O2 S2	4-Methyl-N-(1-methyl-6-thiabicyclo[3.1.1]hept-7-yl)benzenesulfonamide.	D.Sureshkumar,S.Koutha,V.Ganesh,S.Chandrasekaran	J.ORG.CHEM.,2010,75,,5533	P-1	0D		B01	1M2-1
LAPCEM	C17 H17 N3 O5 S2	4-Methyl-N-(4-((5-methyl-1,2-oxazol-3-yl)sulfamoyl)phenyl)benzenesulfonamide.	M.Sohail,M.N.Asghar,M.N.Tahir,M.Shafique,M.Ashfaq	ACTA CRYSTALLOGR.,SECT.E:STRUCT.REP.ONLINE,2012,68,,o693	P21/c	1D	[0,0,1]	K02	2C1
LAPNAT	C15 H15 N5 O4 S2	2,2'-(4-Methyl-4H-1,2,4-triazole-3,5-diyl)dibenzenesulfonamide.	T.Akhtar,W.A.Siddiqui,A.Ashraf,M.N.Tahir	ACTA CRYSTALLOGR.,SECT.E:STRUCT.REP.ONLINE,2012,68,,o754	P21/n	2D	(1,0,1)	K21	hcb; Shubnikov hexagonal plane net/(6,3)
LAPPEZ	C20 H19 F1 N4 O4 S1	4-((4Z)-4-[(2Z)-3-(4-Fluoroanilino)-1-hydroxybut-2-en-1-ylidene]-3-methyl-5-oxo-4,5-dihydro-1H-pyrazol-1-yl)benzenesulfonamide.	A.M.Asiri,H.M.Faidallah,S.W.Ng,E.R.T.Tiekink	ACTA CRYSTALLOGR.,SECT.E:STRUCT.REP.ONLINE,2012,68,,o762	P-1	1D	[1,0,0]	K21	SP 1-periodic net (4,4)(0,2)
LAPSUS	C13 H9 Cl1 N2 O5 S1	N-(3-Chlorobenzoyl)-2-nitrobenzenesulfonamide.	P.A.Suchetan,S.Foro,B.T.Gowda,M.S.Prakash	ACTA CRYSTALLOGR.,SECT.E:STRUCT.REP.ONLINE,2012,68,,o786	Pbca	0D		B01	1M2-1
LAPZIM	C18 H22 N2 O3 S1	4-t-butyl-N-(2-[N-hydroxyethanimidoyl]phenyl)benzenesulfonamide.	P.Tasker,A.Parkin,C.Squires,S.Parsons,D.Messenger	PRIVATE COMMUNICATION,2005,,,	P21/c	0D		B01	1M2-1
LAQLIA	C14 H12 N2 O5 S1	N-(4-Methylbenzoyl)-4-nitrobenzenesulfonamide.	P.A.Suchetan,S.Foro,B.T.Gowda	ACTA CRYSTALLOGR.,SECT.E:STRUCT.REP.ONLINE,2012,68,,o888	Pbca	1D	[0,1,0]	B2	2C1
LATNAW	C16 H16 I1 N3 O4 S1	N-(4-Ethoxy-3-iodo-1H-7-indazolyl)-4-methoxybenzenesulfonamide.	L.Bouissane,S.El Kazzouli,J.-M.Leger,C.Jarry,El M.Rakib,M.Khouili,G.Guillaumet	TETRAHEDRON,2005,61,,8218	P-1	1D	[1,0,0]	K21	SP 1-periodic net (4,4)(0,2)
LAVPUV	C20 H27 N1 O4 S1	N-Benzyl-N-(3,5-dihydroxy-4-methylpentan-2-yl)-4-methylbenzenesulfonamide.	P.B.Brady,H.Yamamoto	Angew.Chem.,Int.Ed.,2012,51,,1942	P21/c	1D	[0,1,0]	K02	2C1
LAWMIH	C14 H13 N5 O4 S1	N-(Diaminomethylene)-4-((3-formyl-4-hydroxyphenyl)diazenyl)benzenesulfonamide.	H.El-Ghamry,K.Sakai,S.Masaoka,K.El-Baradie,R.Issa	J.Coord.Chem.,2012,65,,780	P21/c	3D		G6	pcu alpha-Po primitive cubic; 6/4/c1; sqc1
LEFFAF	C14 H18 N2 O3 S1	4-((5,5-Dimethyl-3-oxocyclohex-1-en-1-yl)amino)benzenesulfonamide.	M.S.Al-Said,M.M.Ghorab,H.A.Ghabbour,C.K.Quah,H.-K.Fun	ACTA CRYSTALLOGR.,SECT.E:STRUCT.REP.ONLINE,2012,68,,o2370	Pbca	3D		P6	pcu alpha-Po primitive cubic; 6/4/c1; sqc1
LEFXEB	C13 H11 Cl2 N1 O2 S1	2,5-Dichloro-N-(3-methylphenyl)benzenesulfonamide.	S.Y.Mughal,I.U.Khan,W.T.A.Harrison,M.H.Khan,M.N.Arshad	ACTA CRYSTALLOGR.,SECT.E:STRUCT.REP.ONLINE,2012,68,,o2476	P21/n	0D		B01	1M2-1
LEGQIZ	C12 H9 Cl1 N2 O4 S1	N-(2-Chlorophenyl)-2-nitrobenzenesulfonamide.	U.Chaithanya,S.Foro,B.T.Gowda	ACTA CRYSTALLOGR.,SECT.E:STRUCT.REP.ONLINE,2012,68,,o2575	P21/c	1D	[0,0,1]	B2	2C1
LEGQOF	C12 H9 Cl1 N2 O4 S1	N-(3-Chlorophenyl)-2-nitrobenzenesulfonamide.	U.Chaithanya,S.Foro,B.T.Gowda	ACTA CRYSTALLOGR.,SECT.E:STRUCT.REP.ONLINE,2012,68,,o2576	P21/c	1D	[0,1,0]	B2	2C1
LEGQUL	C12 H9 Cl1 N2 O4 S1	N-(4-Chlorophenyl)-2-nitrobenzenesulfonamide.	U.Chaithanya,S.Foro,B.T.Gowda	ACTA CRYSTALLOGR.,SECT.E:STRUCT.REP.ONLINE,2012,68,,o2577	P21/c	0D		B01	1M2-1
LIJGOB	C24 H23 N1 O5 S1	N-(4-Methoxybenzyl)-3-((1E)-3-oxo-3-phenylprop-1-en-1-yl)-6-methoxybenzenesulfonamide.	C.R.Andrighetti-Frohner,R.J.Nunes,L.E.da Silva,C.M.O.Simoes,S.Foro	ACTA CRYSTALLOGR.,SECT.E:STRUCT.REP.ONLINE,2007,63,,o3437	P-1	1D	[0,1,0]	B2	2C1
LIQKUS	C14 H18 N4 O4 S2	N-Benzyl-5-(N-(t-butyloxycarbonyl)amino)-1,3,4-thiadiazole-2-sulfonamide.	G.E.Cami,M.del C.R.de Arellano,S.Fustero,J.C.Pedregosa	J.Argent.Chem.Soc.,2006,94,,5	P21/c	1D	[1,0,0]	K21	SP 1-periodic net (4,4)(0,2)
LIYTAO	C21 H21 N3 O4 S1	trans-N-(2-Formyl-4-(5-formylpyrrol-2-yl)-4,5,6,7-tetrahydroindol-7-yl)toluenesulfonamide.	Yu.Zhao,M.Helliwell,J.A.Joule	ACTA CRYSTALLOGR.,SECT.C:CRYST.STRUCT.COMMUN.,2000,56,,714	Pna21	1D	[1,0,0]	P002	2C1
LOCHUH	C13 H17 N5 O2 S1	4-Amino-N-(4,6-diethyl-1,3,5-triazin-2-yl)benzenesulfonamide.	M.F.Haddow,T.Gelbrich,U.J.Griesser	ACTA CRYSTALLOGR.,SECT.C:CRYST.STRUCT.COMMUN.,2008,64,,o309	P21/n	2D	(1,0,1)	K21	hcb; Shubnikov hexagonal plane net/(6,3)
LOCJAP	C11 H13 N5 O4 S1	4-Amino-N-(4,6-dimethoxy-1,3,5-triazin-2-yl)benzenesulfonamide.	M.F.Haddow,T.Gelbrich,U.J.Griesser	ACTA CRYSTALLOGR.,SECT.C:CRYST.STRUCT.COMMUN.,2008,64,,o309	P-1	2D	(0,0,1)	G41	SP 2-periodic net (4,4)Ia; SnS
LOHXIQ	C9 H10 Br1 N1 O4 S1	Methyl (4-bromobenzenesulfonamido)acetate.	M.N.Arshad,M.N.Tahir,I.U.Khan,E.Ahmad,M.Shafiq	ACTA CRYSTALLOGR.,SECT.E:STRUCT.REP.ONLINE,2008,64,,o2380	P-1	0D		B01	1M2-1
LOMWIT	C14 H11 N1 O6 S3	5-(Benzoyloxymethyl)thieno(2,3-b)thiophene-2-sulfonamide 6,6-dioxide.	Hwang-Hsing Chen,J.A.May,V.M.Lynch	J.HETEROCYCL.CHEM.,1999,36,,249	P21/c	2D	(1,0,0)	K4	sql/Shubnikov tetragonal plane net
LUSFUB	C24 H22 N2 O2 S1	4-Methyl-N-(1-phenyl-2-(quinolin-2-yl)ethyl)benzenesulfonamide.	Bo Qian,Shengmei Guo,Jianping Shao,Qiming Zhu,Lei Yang,Chungu Xia,Hanmin Huang	J.AM.CHEM.SOC.,2010,132,,3650	P21/c	0D		B01	1M2-1
LUTNIY	C17 H19 N1 O2 S1	N-((1,2-Diphenylcyclopropyl)methyl)methanesulfonamide.	S.Chuprakov,S.W.Kwok,Li Zhang,L.Lercher,V.V.Fokin	J.AM.CHEM.SOC.,2009,131,,18034	P212121	1D	[0,1,0]	B2	2C1
MACLEJ	C21 H25 N1 O3 S1	(R,R,R)-4-Methyl-N-((2-methyl-6-oxocyclohexyl)(phenyl)methyl)benzenesulfonamide.	R.Sebesta,F.Bilcik,P.Fodran	EUR.J.ORG.CHEM.,2010,,,5666	P21	1D	[0,1,0]	B2	2C1
MADTUH	C13 H14 N1 O2 P1 S2	N-(Diphenylphosphorothioyl)methanesulfonamide.	M.Szabo,D.Ban,C.Rat,A.Silvestru,J.E.Drake,M.B.Hursthouse,M.E.Light	INORG.CHIM.ACTA,2004,357,,3595	I41/a	1D	[0,0,1]	B2	2C1
MADVAP	C19 H18 N1 O2 P1 S2	N-(Diphenylphosphorothioyl)-p-toluenesulfonamide.	M.Szabo,D.Ban,C.Rat,A.Silvestru,J.E.Drake,M.B.Hursthouse,M.E.Light	INORG.CHIM.ACTA,2004,357,,3595	P-1	0D		B01	1M2-1
MANMUK	C20 H20 Br2 N4 O4 S1	N-((2,3-Dibromo-10-oxo-7,8-dihydro-6H,10H-dipyrrolo[1,2-a:1',2'-d]pyrazin-5-ylamino)-(2,6-dimethylphenoxy)methylidene)methanesulfonamide.	D.E.N.Jacquot,M.Zollinger,T.Lindel	Angew.Chem.,Int.Ed.,2005,44,,2295	P-1	0D		B01	1M2-1
MEHMAO	C18 H16 Cl1 N3 O3 S1	N-(3-Benzyloxy-5-methylpyrazin-2-yl)-2-chloro-benzenesulfonamide.	Shu-Rong Ban,Xing Yang,Wen-Bin Chen,Xiao-Feng Cheng,Hai-Bin Song	ACTA CRYSTALLOGR.,SECT.E:STRUCT.REP.ONLINE,2006,62,,o1713	P21/n	0D		B01	1M2-1
METNOP	C16 H13 N1 O4 S1	4-Methyl-7-phenylsulfonamido-2H-1-benzopyran-2-one.	Shu-Ping Yang,Li-Jun Han,Da-Qi Wang	ACTA CRYSTALLOGR.,SECT.E:STRUCT.REP.ONLINE,2007,63,,o135	P-1	0D		B01	1M2-1
MIGTUS	C9 H13 N1 O2 S1	N-(3,5-Dimethylphenyl)methanesulfonamide.	B.T.Gowda,S.Foro,H.Fuess	ACTA CRYSTALLOGR.,SECT.E:STRUCT.REP.ONLINE,2007,63,,o3325	P21/c	1D	[0,1,0]	B2	2C1
MIJDEP	C14 H21 N5 O2 S1	(E)-N-(2-(pyrrolidin-1-yldiazenyl)phenyl)pyrrolidine-1-sulfonamide.	A.R.Katrizky,L.Khelashvili,K.N.B.Le,P.P.Mohapatra,P.J.Steel	J.ORG.CHEM.,2007,72,,5805	P21/c	0D		B01	1M2-1
MIJDIT	C18 H20 N2 O5 S1	4-methyl-N-(2-methyl-1-(4-nitrophenyl)-3-oxobutyl)benzenesulfonamide.	S.A.Garner,M.J.Krische	J.ORG.CHEM.,2007,72,,5843	P212121	1D	[1,0,0]	B2	2C1
MILHOF02	C28 H27 N3 O4 S2	4-methyl-N-(2-[([2-((p-tosylamino)methyl)phenyl]imino)methyl]phenyl)benzenesulfonamide.	J.Sanmartin,F.Novio,A.M.Garcia-Deibe,M.Fondo,M.R.Bermejo	New J.Chem.,2007,31,,1605	P-1	0D		B01	1M2-1
MIYFEF	C2 H7 N1 O2 S1	N-Methylmethane sulfonamide.	T.C.Higgs,A.Parkin,S.Parsons,P.A.Tasker	ACTA CRYSTALLOGR.,SECT.E:STRUCT.REP.ONLINE,2002,58,,o523	P21/c	1D	[0,0,1]	B2	2C1
MOFBEP	C17 H13 N5 O4 S1	trans-4-((3-Formyl-4-hydroxyphenyl)diazenyl)-N-(pyrimidin-2-yl)benzenesulfonamide.	H.El-Ghamry,R.Issa,K.El-Baradie,K.Isagai,S.Masaoka,K.Sakai	ACTA CRYSTALLOGR.,SECT.E:STRUCT.REP.ONLINE,2008,64,,o1673	P21/c	0D		B01	1M2-1
MOKMIJ	C13 H11 Cl1 N2 O3 S1	4-((E)-(5-Chloro-2-hydroxybenzylidene)amino)benzenesulfonamide.	Z.H.Chohan,H.A.Shad,M.N.Tahir	ACTA CRYSTALLOGR.,SECT.E:STRUCT.REP.ONLINE,2009,65,,o57	P21	1D	[0,1,0]	B2	2C1
MOKQEJ	C18 H14 Cl2 N2 O4 S2	4,4'-dichloro-N,N'-(o-phenylene)dibenzenesulfonamide.	J.Krainova,C.Dares,A.B.P.Lever	ACTA CRYSTALLOGR.,SECT.E:STRUCT.REP.ONLINE,2009,65,,o178	P-1	1D	[1,0,0]	K21	SP 1-periodic net (4,4)(0,2)
MORNUD	C19 H26 N2 O3 S1	N-(1-Anilino-3-hydroxy-4-methyl-1-phenyl-2-pentanyl)methanesulfonamide.	Wei Du,Yan-Kai Liu,Lei Yue,Ying-Chun Chen	SYNLETT,2008,,,2997	P212121	1D	[1,0,0]	T02	2C1
MOTDEF	C14 H14 N2 O5 S2	N-Acetyl-4-(benzenesulfonamido)benzenesulfonamide.	M.Ashfaq,M.N.Tahir,I.U.Khan,M.N.Arshad,S.Saeed-ul-Hassan	ACTA CRYSTALLOGR.,SECT.E:STRUCT.REP.ONLINE,2009,65,,o1180	P21/n	2D	(1,0,1)	K21	hcb; Shubnikov hexagonal plane net/(6,3)
MOVQIY	C17 H16 N2 O2 S1	4-Methyl-N-(2-(1H-pyrrol-3-yl)phenyl)benzenesulfonamide.	A.B.Vazquez,S.Bernes,A.Ortiz,L.Quintero,R.L.Meza-Leon	TETRAHEDRON LETT.,2009,50,,1539	P21/c	0D		B01	1M2-1
MOWYON	C12 H9 F2 N5 O3 S1	N-(2,6-Difluorophenyl)-5-methoxy[1,2,4]triazolo[1,5-a]pyrimidine-2-sulfonamide.	Chao-Nan Chen,Li-Li Lv,Feng-Qin Ji,Qiong Chen,Hui Xu,Cong-Wei Niu,Zhen Xi,Guang-Fu Yang	BIOORG.MED.CHEM.,2009,17,,3011	P21/c	1D	[0,0,1]	B2	2C1
MSULPH01	C1 H5 N1 O2 S1	Methanesulfonamide.	R.Frohlich,B.Wibbeling	PRIVATE COMMUNICATION,2000,,,	Pnma	2D	(1,0,0)	K4	sql/Shubnikov tetragonal plane net
MUBVOV	C7 H10 N2 O2 S1	5-Amino-2-methylbenzenesulfonamide.	Xiang-Jun Ma,Zheng Fang,Li-Li Ren,Ping Wei	ACTA CRYSTALLOGR.,SECT.E:STRUCT.REP.ONLINE,2009,65,,o1815	Iba2	1D	[0,0,1]	K4	SP 1-periodic net (4,4)(2,2)
MUBVUB	C8 H8 Br1 N1 O4 S1	2-(4-Bromobenzenesulfonamido)acetic acid.	M.N.Arshad,I.U.Khan,M.Shafiq,M.N.Khan,H.Stoeckli-Evans	ACTA CRYSTALLOGR.,SECT.E:STRUCT.REP.ONLINE,2009,65,,o1816	P-1	1D	[0,1,0]	T02	2C1
MUCWAJ	C14 H19 N1 O3 S1	N-(4-Methoxyhex-5-yn-2-yl)-4-methylbenzenesulfonamide.	V.Prisyazhnyuk,M.Jachan,I.Brudgam,R.Zimmer,H.-U.Reissig	COLLECT.CZECH.CHEM.COMMUN.,2009,74,,1069	P21	1D	[0,1,0]	B2	2C1
MUFCEW	C23 H21 Br1 N2 O4 S1	N-(1-(4-Bromophenyl)-2-nitro-3-phenylbut-3-en-1-yl)-4-methylbenzenesulfonamide.	Xiao Wang,Yong-Fei Chen,Liang-Feng Niu,Peng-Fei Xu	Org.Lett.,2009,11,,3310	P212121	1D	[1,0,0]	B2	2C1
MULWEW	C7 H11 N3 O4 S1	N,N,5-Trimethyl-2,4-dioxo-3,4-dihydropyrimidine-1(2H)-sulfonamide.	Y.M.Loksha,E.B.Pedersen,A.D.Bond,P.La Colla,B.Secci,R.Loddo	SYNTHESIS,2009,,,3589	P21/n	0D		B01	1M2-1
MUTJUH	C17 H14 N2 O5 S1	N-(4-(2,5-Dioxo-2,5-dihydro-1H-pyrrol-1-yl)-2-phenoxyphenyl)methanesulfonamide.	A.Bhattacharya,K.Kankanala,S.Pal,A.K.Mukherjee	J.MOL.STRUCT.,2010,975,,40	P-1	0D		B01	1M2-1
MUZZAJ	C28 H27 F6 N3 O3 S1	N-(6'-Methoxycinchonan-9-yl)-3,5-bis(trifluoromethyl)benzenesulfonamide.	Sang Eun Park,Eun Hye Nam,Hyeong Bin Jang,Joong Suk Oh,S.Some,Yong Seup Lee,Choong Eui Song	ADV.SYNTH.CATAL.,2010,352,,2211	C2	1D	[0,1,0]	B2	2C1
NABPUD	C22 H25 Br1 N2 O5 S1	(R)-(+)-N-(4-((6-Bromo-2,2-dimethyl-5'-oxo-2,3-dihydro-4'H-spiro[chromene-4,2'-[1,4]oxazinan]-4'-yl)methyl)phenyl)methanesulfonamide.	S.Rapposelli,V.Calderone,R.Cirilli,M.Digiacomo,C.Faggi,F.La Torre,M.Manganaro,A.Martelli,L.Testai	J.Med.Chem.,2009,52,,1477	P31	1D	[0,0,1]	B2	2C1
NABQAK	C22 H25 Br1 N2 O5 S1	(S)-(-)-N-(4-((6-Bromo-2,2-dimethyl-5'-oxo-2,3-dihydro-4'H-spiro[chromene-4,2'-[1,4]oxazinan]-4'-yl)methyl)phenyl)methanesulfonamide.	S.Rapposelli,V.Calderone,R.Cirilli,M.Digiacomo,C.Faggi,F.La Torre,M.Manganaro,A.Martelli,L.Testai	J.Med.Chem.,2009,52,,1477	P32	1D	[0,0,1]	B2	2C1
NACMIP	C13 H16 Br1 N5 O3 S1	4-((2-(4-Bromo-1H-pyrrol-2-yl)-4,5-dihydro-1,3-oxazol-5-yl)methyl)-N,N-dimethyl-1H-imidazole-1-sulfonamide.	S.Mukherjee,R.Sivappa,M.Yousufuddin,C.J.Lovely	SYNLETT,2010,,,817	P-1	0D		B01	1M2-1
NAJQOG	C16 H15 N1 O4 S2	N-(4,7-Dimethyl-2-oxo-benzo(1,3)oxathiol-5-yl)-4-benzenesulfonamide.	A.P.Avdeenko,V.V.Pirozhenko,S.A.Konovalova,D.A.Roman'kov,G.V.Palamarchuk,O.V.Shishkin	ZH.ORG.KHIM.(RUSS.)(RUSS.J.ORG.CHEM.),2009,45,,419	C2/c	0D		B01	1M2-1
NARMIC	C26 H31 Br1 N2 O4 S2	5-(4-Bromophenylsulfonamidomethyl)-5-(prop-2-enyl)-3-tosyl-3-azabicyclo(4.4.0)decan-8-ene.	N.Matzanke,R.J.Gregg,S.M.Weinreb,M.Parvez	J.ORG.CHEM.,1997,62,,1920	P21/a	0D		B01	1M2-1
NARVUZ	C10 H9 N3 O3 S1	2-Oxo-2H-1,4'-bipyridine-3'-sulfonamide.	Z.Brzozowski,J.Slawinski,M.Gdaniec,A.Innocenti,C.T.Supuran	EUR.J.MED.CHEM.,2011,46,,4403	P21/n	1D	[0,1,0]	T4	SP 1-periodic net (3,6)(1,2)
NARZIR	C22 H19 N1 O4 S1	N-(4-(3-(4-Hydroxyphenyl)acryloyl)phenyl)-4-methylbenzenesulfonamide.	Woo Duck Seo,Young Bae Ryu,M.J.Curtis-Long,Chan Woo Lee,Hyung Won Ryu,Ki Chang Jang,Ki Hun Park	EUR.J.MED.CHEM.,2010,45,,2010	P21/n	1D	[0,1,0]	B2	2C1
NEQNEC	C22 H21 N1 O2 S1	syn-N-(1,2-diphenyl-3-butenyl)benzenesulfonamide.	Wenshuo Lu,Tak Hang Chan	J.ORG.CHEM.,2000,65,,8589	C2/c	1D	[0,1,0]	B2	2C1
NIVNEM	C22 H28 N2 O5 S1	N-(1-(4-Methoxyphenyl)-2-methyl-3-(morpholin-4-yl)-3-oxopropyl)-4-methylbenzenesulfonamide.	O.Prieto,Hon Wai Lam	ORG.BIOMOL.CHEM.,2008,6,,55	Pccn	1D	[0,0,1]	B2	2C1
NIWGEG	C20 H23 N3 O2 S1	N-(2-(Cyano(pyridine-2-yl)methyl)cyclohexyl)-4-methylbenzenesulfonamide.	E.V.Blyumin,H.J.Gallon,A.K.Yudin	Org.Lett.,2007,9,,4677	P21/c	0D		B01	1M2-1
NIWGOQ	C19 H24 N2 O4 S2	N-(2-(Methylsulfonyl(pyridine-2-yl)methyl)cyclopentyl)-4-methylbenzenesulfonamide.	E.V.Blyumin,H.J.Gallon,A.K.Yudin	Org.Lett.,2007,9,,4677	P21/c	0D		B01	1M2-1
NIWPAL	C9 H12 N2 O2 S1	1,2,3,4-Tetrahydroisoquinoline-2-sulfonamide.	R.Bouasla,M.Berredjem,N.-E.Aouf,C.Barbey	ACTA CRYSTALLOGR.,SECT.E:STRUCT.REP.ONLINE,2008,64,,o432	P21	2D	(0,0,1)	K4	sql/Shubnikov tetragonal plane net
NODYEL	C23 H21 N1 O3 S1	4-Methyl-N-(5,6,6a,11a-tetrahydrobenzo[b]naphtho[2,1-d]furan-8-yl)benzenesulfonamide.	Renhua Fan,Weixun Li,Yang Ye,Linfei Wang	ADV.SYNTH.CATAL.,2008,350,,1531	P-1	0D		B01	1M2-1
NOKHAX	C43 H37 Cl1 N2 O4 S1	rac-N-(2-(3-(9'-Anthracenyl-10'-chloro)-4-pentanoylisoxazol-5-yl)-1,3-diphenylpropyl)benzenesulfonamide.	Chun Li,B.Twamley,N.R.Natale	J.HETEROCYCL.CHEM.,2008,45,,259	P21/c	0D		B01	1M2-1
NORHIM	C14 H14 Cl1 N1 O2 S1	4-Chloro-2-methyl-N-(2-methylphenyl)benzenesulfonamide.	B.T.Gowda,S.Foro,P.G.Nirmala,H.Terao,H.Fuess	ACTA CRYSTALLOGR.,SECT.E:STRUCT.REP.ONLINE,2009,65,,o800	P-1	0D		B01	1M2-1
NORPOA	C15 H17 N1 O2 S1	N-(3,4-Dimethylphenyl)-4-methylbenzenesulfonamide.	B.T.Gowda,S.Foro,P.G.Nirmala,H.Terao,H.Fuess	ACTA CRYSTALLOGR.,SECT.E:STRUCT.REP.ONLINE,2009,65,,o877	P21/c	1D	[0,0,1]	B2	2C1
NUJZOH	C16 H14 N2 O4 S1	4-Nitro-N-((1aRS,6RS,6aSR)-1,1a,6,6a-tetrahydrocyclopropa(a)inden-6-yl)benzenesulfonamide.	I.Nageli,C.Baud,G.Bernardinelli,Y.Jacquier,M.Moran,P.Muller	HELV.CHIM.ACTA,1997,80,,1087	Cc	1D	[0,1,0]	B2	2C1
NUPJEN	C24 H22 N2 O4 S2	1,8-bis(4-Toluenesulfonamido)naphthalene.	K.Wozniak,Heyong He,J.Klinowski,T.L.Barr,S.E.Hardcastle	J.Phys.Chem.,1996,100,,11408	P-1	0D		B01	1M2-1
NUPNOC	C14 H13 N1 O3 S1	N-Benzoyl-2-methylbenzenesulfonamide.	P.A.Suchetan,B.T.Gowda,S.Foro,H.Fuess	ACTA CRYSTALLOGR.,SECT.E:STRUCT.REP.ONLINE,2010,66,,o1024	Pna21	1D	[0,0,1]	B2	2C1
NUPQUL	C14 H13 N1 O3 S1	N-Benzoyl-4-methylbenzenesulfonamide.	P.A.Suchetan,B.T.Gowda,S.Foro,H.Fuess	ACTA CRYSTALLOGR.,SECT.E:STRUCT.REP.ONLINE,2010,66,,o1039	P212121	1D	[1,0,0]	B2	2C1
NUPRAS	C13 H9 Cl2 N1 O3 S1	2-Chloro-N-(2-chlorobenzoyl)benzenesulfonamide.	P.A.Suchetan,B.T.Gowda,S.Foro,H.Fuess	ACTA CRYSTALLOGR.,SECT.E:STRUCT.REP.ONLINE,2010,66,,o1040	P21/n	0D		B01	1M2-1
NUPTOI	C16 H19 N1 O2 S1	N-(2,4-Dimethylphenyl)-2,4-dimethylbenzenesulfonamide.	P.G.Nirmala,B.T.Gowda,S.Foro,H.Fuess	ACTA CRYSTALLOGR.,SECT.E:STRUCT.REP.ONLINE,2010,66,,o1059	P-1	0D		B01	1M2-1
NUPZEE	C12 H11 N1 O3 S1	N-(4-Hydroxyphenyl)benzenesulfonamide.	I.U.Khan,I.Mariam,M.Zia-ur-Rehman,M.Arif Sajjad,S.Sharif	ACTA CRYSTALLOGR.,SECT.E:STRUCT.REP.ONLINE,2010,66,,o1088	P212121	2D	(0,0,1)	K4	sql/Shubnikov tetragonal plane net
NUPZOO	C14 H13 Cl2 N1 O2 S1	N-(3,5-Dichlorophenyl)-2,4-dimethylbenzenesulfonamide.	P.G.Nirmala,B.T.Gowda,S.Foro,H.Fuess	ACTA CRYSTALLOGR.,SECT.E:STRUCT.REP.ONLINE,2010,66,,o1090	C2/c	0D		B01	1M2-1
NUQMUI	C16 H19 N1 O2 S1	N-(3,4-Dimethylphenyl)-2,4-dimethylbenzenesulfonamide.	B.T.Gowda,S.Foro,P.G.Nirmala,H.Fuess	ACTA CRYSTALLOGR.,SECT.E:STRUCT.REP.ONLINE,2010,66,,o1150	P21/c	1D	[0,0,1]	B2	2C1
NUQQEW	C15 H17 N1 O2 S1	N-(2,6-Dimethylphenyl)-4-methylbenzenesulfonamide.	P.G.Nirmala,B.T.Gowda,S.Foro,H.Fuess	ACTA CRYSTALLOGR.,SECT.E:STRUCT.REP.ONLINE,2010,66,,o1168	P21/n	1D	[1,0,0]	B2	2C1
NUVVUW	C29 H29 N5 O4 S1	N-(1-(3-(1H-Indol-3-yl)-5-oxo-6-phenyl-4,5-dihydro-1,2,4-triazin-2(3H)-yl)-3-methyl-1-oxobutan-2-yl)-4-methylbenzenesulfonamide.	I.N.Egorov,V.L.Rusinov,P.A.Slepukhin,O.N.Chupakhin	J.Chem.Cryst.,2010,40,,387	P1	2D	(0,0,1)	K4	sql/Shubnikov tetragonal plane net
OBAWUJ	C25 H29 N1 O2 S1 Se1	N-[(3,3-dimethyl-2-methylene-1',3'-dihydro-1H-spiro[bicyclo[2.2.1]heptane-7,2'-inden]-1-yl)seleno]-p-methylbenzenesulfonamide.	K.Shimada,K.Kodaki,T.Nanae,S.Aoyagi,Y.Takikawa,C.Kabuto	TETRAHEDRON LETT.,2000,41,,6833	P212121	1D	[0,0,1]	B2	2C1
OBUKIH	C19 H21 N3 O3 S1	N-(7-Ethoxy-2-(prop-2-en-1-yl)-2H-indazol-6-yl)-4-methylbenzenesulfonamide.	N.Abbassi,E.M.Rakib,A.Hannioui,H.Zouihri	ACTA CRYSTALLOGR.,SECT.E:STRUCT.REP.ONLINE,2011,67,,o3211	P21/c	0D		B01	1M2-1
OBUWEP	C11 H15 N1 O6 S1	3-Hydroxy-2-(4-methoxybenzenesulfonamido)butanoic acid.	S.Sinha,H.Osman,H.A.Wahab,M.Hemamalini,H.-K.Fun	ACTA CRYSTALLOGR.,SECT.E:STRUCT.REP.ONLINE,2011,67,,o3275	P212121	1D	[0,1,0]	K02	2C1
OCAGAB	C19 H16 N6 O4 S1	N-(3-Methoxy-5-methylpyrazin-2-yl)-2-(4-(1,3,4-oxadiazol-2-yl)phenyl)pyridine-3-sulfonamide.	B.Stensland,R.J.Roberts	ACTA CRYSTALLOGR.,SECT.E:STRUCT.REP.ONLINE,2004,60,,o1817	P21/n	0D		B01	1M2-1
OCAMAH	C39 H42 Br1 N1 O4 S2 Si1	N-((1S,2S,3R)-3-(t-Butyldiphenylsiloxy)-2-bromo-1-phenyl-4-(phenylsulfinyl)butyl)-p-toluenesulfonamide.	K.Ravikumar,G.Y.S.K.Swamy,S.Raghavan,Ch.N.Kumar	ACTA CRYSTALLOGR.,SECT.E:STRUCT.REP.ONLINE,2004,60,,o1880	P21/c	1D	[0,1,0]	B2	2C1
OCAMUB	C16 H8 N6 O8 S2	9-Dicyanomethylene-4,5-dinitrofluorene-2,7-disulfonamide.	A.S.Batsanov,I.F.Perepichka	ACTA CRYSTALLOGR.,SECT.E:STRUCT.REP.ONLINE,2004,60,,o1892	Pna21	3D		G6	ecu-6-Pnna
OCAZID	C16 H20 F1 N3 O3 S1	N-(4-(4-Fluorophenyl)-5-(hydroxymethyl)-6-isopropylpyrimidin-2-yl)-N-methylmethanesulfonamide.	Hong Xu,Hong-shun Sun,Feng-mao Luo	ACTA CRYSTALLOGR.,SECT.E:STRUCT.REP.ONLINE,2011,67,,o3432	P21/c	1D	[0,1,0]	B2	2C1
OCELEP	C14 H12 Cl1 N1 O3 S1	N-(3-Chlorobenzoyl)-2-methylbenzenesulfonamide.	P.A.Suchetan,S.Foro,B.T.Gowda	ACTA CRYSTALLOGR.,SECT.E:STRUCT.REP.ONLINE,2011,67,,o3489	C2/c	0D		B01	1M2-1
OCEQOE	C13 H10 N2 O5 S1	N-Benzoyl-3-nitrobenzenesulfonamide.	P.A.Suchetan,S.Foro,B.T.Gowda	ACTA CRYSTALLOGR.,SECT.E:STRUCT.REP.ONLINE,2011,67,,o3515	P21/c	1D	[0,1,0]	B2	2C1
ODAYEY	C17 H16 Cl1 N3 O3 S2	N-(1-(5-(Benzylthio)-1,3,4-oxadiazol-2-yl)ethyl)-4-chlorobenzenesulfonamide.	M.Zareef,R.Iqbal,J.H.Zaidi,M.Arfan,M.Parvez	ACTA CRYSTALLOGR.,SECT.E:STRUCT.REP.ONLINE,2006,62,,o2449	P21/c	1D	[0,1,0]	B2	2C1
ODEPUJ	C12 H9 Cl2 N1 O2 S1	4,4'-Dichlorobenzenesulfonamidobenzene.	T.Gelbrich,M.B.Hursthouse,T.L.Threlfall	ACTA CRYSTALLOGR.,SECT.B:STRUCT.SCI.,2007,63,,621	R-3	0D		B01	1M2-1
OFEKEQ	C11 H9 N3 O4 S1	4-Nitro-N-(4-pyridyl)benzenesulfonamide.	Hai-Jun Yu,Jiang-Sheng Li	ACTA CRYSTALLOGR.,SECT.E:STRUCT.REP.ONLINE,2007,63,,o3399	P21/c	1D	[0,0,1]	B2	2C1
OFIHOB	C21 H20 Br1 N3 O3 S1	N-(5-Bromo-2-(piperidine-1-carbonyl)phenyl)quinoline-5-sulfonamide.	M.D.Rosen,M.D.Hack,B.D.Allison,V.K.Phuong,C.R.Woods,M.F.Morton,C.E.Prendergast,T.D.Barrett,C.Schubert,Lina Li,Xiaodong Wu,Jiejun Wu,J.M.Freedman,N.P.Shankley,M.H.Rabinowitz	BIOORG.MED.CHEM.,2008,16,,3917	P21/c	0D		B01	1M2-1
OHAWUP	C22 H24 Cl1 N1 O3 S1	syn-N-((4-Chlorophenyl)-(2-oxocyclo-oct-3-enyl)methyl)-4-methylbenzenesulfonamide.	Min Shi,Yong-Mei Xu,Gui-Ling Zhao,Xiao-Feng Wu	EUR.J.ORG.CHEM.,2002,,,3666	Pna21	1D	[1,0,0]	B2	2C1
OJOPAF	C22 H20 N2 O2 S1	N-(3-(1H-Indol-3-yl)-4-methylphenyl)-4-methylbenzenesulfonamide.	Linfei Wang,Zhaomeng Han,Renhua Fan	ADV.SYNTH.CATAL.,2010,352,,3230	P212121	3D		K4	dia Diamond; 4/6/c1; sqc6
OKEWEG	C16 H28 N2 O6 S1 Si1	3-Butoxycarbonyl-4-(2-(trimethylsilyl)ethylsulfonamido)cyclopentene[c][1,3]oxazolidin-2-one.	K.J.Hale,M.M.Domostoj,D.A.Tocher,E.Irving,F.Scheinmann	Org.Lett.,2003,5,,2927	P212121	1D	[1,0,0]	B2	2C1
OMELIC	C8 H19 N1 O2 S2	N-(t-butylthio)-t-butylsulfonamide.	V.R.Arava,L.Gorentla,P.K.Dubey	Beilstein J.Org.Chem.,2011,7,,9	Pbca	1D	[0,1,0]	B2	2C1
ONOCAW	C11 H15 N1 O4 S1	N-(3-(2-Furyl)-2-hydroxyprop-2-en-1-ylidene)-2-methylpropane-2-sulfonamide.	Longwu Ye,Weimin He,Liming Zhang	Angew.Chem.,Int.Ed.,2011,50,,3236	P21/c	1D	[0,0,1]	B2	2C1
OPEKOK	C13 H14 N2 O3 S1	N-(4-Amino-2-phenoxyphenyl)methanesulfonamide.	A.Bhattacharya,S.Ghosh,K.Kankanala,V.R.Reddy,K.Mukkanti,S.Pal,A.K.Mukherjee	CHEM.PHYS.LETT.,2010,493,,151	P21/a	3D		G6	pcu alpha-Po primitive cubic; 6/4/c1; sqc1
OPEKUQ	C21 H16 N2 O5 S1	N-(4-(1,3-Dioxo-1,3-dihydro-2H-isoindol-2-yl)-2-phenoxyphenyl)methanesulfonamide.	A.Bhattacharya,S.Ghosh,K.Kankanala,V.R.Reddy,K.Mukkanti,S.Pal,A.K.Mukherjee	CHEM.PHYS.LETT.,2010,493,,151	P-1	0D		B01	1M2-1
OTONUH	C9 H24 N4 O6 S3	N,N,N-tris(2-(methanesulfonamido)ethyl)amine.	A.D.Schwarz,K.R.Herbert,C.Paniagua,P.Mountford	Organometallics,2010,29,,4171	P21/c	1D	[0,1,0]	B2	2C1
PAHPAQ	C20 H18 N2 O3 S1	N-(2-((Hydroxyimino)(phenyl)methyl)phenyl)-p-toluenesulfonamide.	S.Parsons,C.Squires,P.Tasker,A.Parkin,P.A.Wood	PRIVATE COMMUNICATION,2004,,,	P-1	1D	[1,0,0]	K02	2C1
PAHQAR	C20 H18 N2 O3 S1	N-(2-((Hydroxyimino)(phenyl)methyl)phenyl)-p-toluenesulfonamide.	S.Parsons,C.Squires,P.Tasker,P.A.Wood	PRIVATE COMMUNICATION,2004,,,	P21/c	0D		B01	1M2-1
PALPUP	C49 H42 Br1 N1 O3 S1	N-((4-Bromophenyl)(2-oxo-6-(1,1,5,5-tetraphenylpent-4-en-2-yn-1-yl)cyclohexyl)methyl)-4-methylbenzenesulfonamide.	Bei-Li Lu,Jian-Mei Lu,Min Shi	EUR.J.ORG.CHEM.,2012,,,587	P21/n	0D		B01	1M2-1
PANHAO	C18 H11 Cl2 F3 N4 O3 S1	1-(2,6-Dichloro-4-(trifluoromethyl)phenyl)-5-(4-methoxyphenylsulfonamido)-1H-pyrazole-3-carbonitrile.	Xiao-Hong Zhang,Ping Zhong,Hong-Ping Xiao,Mao-Lin Hu	ACTA CRYSTALLOGR.,SECT.E:STRUCT.REP.ONLINE,2005,61,,o2134	P-1	0D		B01	1M2-1
PAVBUL	C14 H14 N2 O3 S1	4-((4-Methoxybenzylidene)amino)benzenesulfonamide.	O.G.Idemudia,A.P.Sadimenko,A.J.Afolayan,E.C.Hosten	ACTA CRYSTALLOGR.,SECT.E:STRUCT.REP.ONLINE,2012,68,,o1599	P21/c	2D	(1,0,0)	K21	hcb; Shubnikov hexagonal plane net/(6,3)
PEBGIO	C30 H29 N1 O3 S1	4-Methyl-N-(2,4,5-triphenyltetrahydro-2H-pyran-2-yl)benzenesulfonamide.	C.Simal,T.Lebl,A.M.Z.Slawin,A.D.Smith	Angew.Chem.,Int.Ed.,2012,51,,3653	P212121	1D	[0,1,0]	B2	2C1
PELZOV	C17 H25 N1 O4 S2	5-Methyl-5-p-toluenesulfonamido-8,8-dimethyl-3-oxo-2,3-oxathiabicyclo(4.3.0)nonane.	C.M.Marson,P.R.Giles,H.Adams,N.A.Bailey	CHEM.COMMUN.,1993,,,1195	P-1	1D	[1,0,0]	B2	2C1
PEMGIY	C12 H13 N3 O2 S1	N-(4,6-Dimethyl-2,3-dihydropyrimidin-2-ylidene)benzenesulfonamide.	Gong-Chun Li,Feng-Ling Yang	ACTA CRYSTALLOGR.,SECT.E:STRUCT.REP.ONLINE,2006,62,,o4205	P21/c	1D	[0,1,0]	B2	2C1
PEMYOV	C13 H13 N1 O3 S1	N-(3-Hydroxyphenyl)-p-toluenesulfonamide.	S.Goswami,A.K.Mahapatra,G.D.Nigam,K.Chinnakali,Hoong-Kun Fun	ACTA CRYSTALLOGR.,SECT.C:CRYST.STRUCT.COMMUN.,1998,54,,1301	C2/c	1D	[0,1,0]	K4	SP 1-periodic net (3,6)(1,2)
PEPRIM	C14 H21 N1 O3 S1	N-(1S,2S)-2-ethyl-2-hydroxycyclobutylmethyl 4-methylbenzenesulfonamide.	S.Baktharaman,S.Selvakumar,V.K.Singh	Org.Lett.,2006,8,,4335	P212121	2D	(0,0,1)	K4	sql/Shubnikov tetragonal plane net
PEWGUT	C17 H16 N2 O3 S1	6-Hydroxy-2-methyl-8-p-toluenesulfonamidoquinoline.	J.M.Gulbis,S.F.Lincoln,I.B.Mahadevan,E.R.Tiekink,A.D.Ward	Z.KRISTALLOGR.,1993,206,,301	P21/n	1D	[0,1,0]	K02	2C1
PEZJEK	C18 H20 Cl1 N1 O2 S2	N-(2-(4-Chlorophenylsulfanyl)cyclopentyl)-4-methylphenylsulfonamide.	D.Sureshkumar,T.Gunasundari,V.Ganesh,S.Chandrasekaran	J.ORG.CHEM.,2007,72,,2106	P-1	0D		B01	1M2-1
PIXXAW	C18 H16 N1 O2 P1 S2	N-(Diphenylphosphorothioyl)benzenesulfonamide.	A.Pop,A.Rotar,C.Rat,A.Silvestru	INORG.CHIM.ACTA,2008,361,,255	P21/c	0D		B01	1M2-1
PODQAB	C15 H16 N2 O3 S1	2-((3,4-Dimethylphenyl)carbamoyl)benzenesulfonamide.	W.A.Siddiqui,S.Ahmad,H.L.Siddiqui,M.Parvez	ACTA CRYSTALLOGR.,SECT.C:CRYST.STRUCT.COMMUN.,2008,64,,o367	P21/c	2D	(0,0,1)	K4	sql/Shubnikov tetragonal plane net
POPJUA01	C17 H15 N3 O4 S1	4-((2-Hydroxybenzylidene)amino)-N-(5-methyl-1,2-oxazol-3-yl)benzenesulfonamide.	S.Ebenezer,P.T.Muthiah	ACTA CRYSTALLOGR.,SECT.E:STRUCT.REP.ONLINE,2010,66,,o2574	P21/c	0D		B01	1M2-1
PUFHUU	C15 H15 Br1 N2 O3 S1	4-(2-((5-Bromo-2-hydroxybenzylidene)amino)ethyl)benzenesulfonamide.	Z.H.Chohan,H.A.Shad,M.N.Tahir,K.H.Thebo	ACTA CRYSTALLOGR.,SECT.E:STRUCT.REP.ONLINE,2009,65,,o2450	Pna21	1D	[0,0,1]	B2	2C1
PUFJIK	C8 H9 N1 O4 S1	2-Methanesulfonamidobenzoic acid.	M.Shafiq,M.Zia-ur-Rehman,I.U.Khan,M.N.Arshad,I.Ahmad	ACTA CRYSTALLOGR.,SECT.E:STRUCT.REP.ONLINE,2009,65,,o2453	P-1	0D		B01	1M2-1
PUGNUB	C15 H15 N1 O4 S1	2-(4-Methylbenzenesulfonamido)-2-phenylacetic acid.	I.Mariam,M.Akkurt,S.Sharif,N.Akhtar,I.U.Khan	ACTA CRYSTALLOGR.,SECT.E:STRUCT.REP.ONLINE,2009,65,,o2797	P212121	1D	[1,0,0]	K4	SP 1-periodic net (3,6)(1,2)
PUGTER	C16 H20 N4 O3 S1	N-(4,6-Dimethylpyrimidin-2-yl)-4-(tetrahydrofuran-2-ylamino)benzenesulfonamide.	H.D.Arman,T.Kaulgud,E.R.T.Tiekink,D.J.Young	ACTA CRYSTALLOGR.,SECT.E:STRUCT.REP.ONLINE,2009,65,,o2851	P21/c	1D	[0,1,0]	K02	2C1
PUJQOB	C12 H9 Cl2 N1 O2 S1	N-(2,5-Dichlorophenyl)benzenesulfonamide.	B.T.Gowda,S.Foro,P.G.Nirmala,H.Fuess	ACTA CRYSTALLOGR.,SECT.E:STRUCT.REP.ONLINE,2010,66,,o594	P21/n	0D		B01	1M2-1
PUTSIH	C11 H16 N2 O4 S2	N-((1-(Methylsulfonyl)-2,3-dihydro-1H-indol-2-yl)methyl)methanesulfonamide.	F.C.Sequiera,B.W.Turnpenny,S.R.Chemler	Angew.Chem.,Int.Ed.,2010,49,,6365	P-1	0D		B01	1M2-1
PUVJAS	C22 H19 Br1 N2 O5 S1	(R,R)-N-(2-Bromo-1-(3-nitrophenyl)-3-oxo-3-phenylpropyl)-4-methylbenzenesulfonamide.	Yunfei Cai,Xiaohua Liu,Yanghai Hui,Jun Jiang,Wentao Wang,Weiliang Chen,Lili Lin,Xiaoming Feng	Angew.Chem.,Int.Ed.,2010,49,,6160	P21	1D	[0,1,0]	B2	2C1
QAJMEV	C14 H12 Cl1 N1 O3 S1	4-Chloro-N-(2-methylbenzoyl)benzenesulfonamide.	P.A.Suchetan,S.Foro,B.T.Gowda	ACTA CRYSTALLOGR.,SECT.E:STRUCT.REP.ONLINE,2011,67,,o22	P-1	0D		B01	1M2-1
QAJPIC	C13 H11 Cl2 N1 O2 S1	N-(2,5-Dichlorophenyl)-4-methylbenzenesulfonamide.	K.Shakuntala,S.Foro,B.T.Gowda	ACTA CRYSTALLOGR.,SECT.E:STRUCT.REP.ONLINE,2011,67,,o40	P21/c	0D		B01	1M2-1
QAJZOS	C13 H11 Cl2 N1 O2 S1	N-(3,4-Dichlorophenyl)-4-methylbenzenesulfonamide.	K.Shakuntala,S.Foro,B.T.Gowda	ACTA CRYSTALLOGR.,SECT.E:STRUCT.REP.ONLINE,2011,67,,o104	P21/c	0D		B01	1M2-1
QAKHIV	C13 H11 Cl2 N1 O2 S1	N-(2,6-Dichlorophenyl)-4-methylbenzenesulfonamide.	K.Shakuntala,S.Foro,B.T.Gowda	ACTA CRYSTALLOGR.,SECT.E:STRUCT.REP.ONLINE,2011,67,,o142	P21/n	1D	[1,0,0]	B2	2C1
QAKPUP	C14 H15 N1 O3 S1	N-(4-Methoxyphenyl)-4-methylbenzenesulfonamide.	M.Akkurt,I.Mariam,I.Naseer,I.U.Khan,S.Sharif	ACTA CRYSTALLOGR.,SECT.E:STRUCT.REP.ONLINE,2011,67,,o186	P21	1D	[0,1,0]	B2	2C1
QAKXUX	C18 H18 N6 O2 S1	4-((4-(bis(2-cyanoethyl)amino)phenyl)diazenyl)benzenesulfonamide.	G.Gervasio,D.Marabello,F.Bertolotti	ACTA CRYSTALLOGR.,SECT.E:STRUCT.REP.ONLINE,2011,67,,o231	P-1	1D	[1,0,0]	K21	SP 1-periodic net (4,4)(0,2)
QAMTIH	C16 H20 N2 O4 S2	N,N'-Ethylenebis(p-toluenesulfonamide).	A.S.Gajadhar-Plummer,I.A.Kahwa,J.T.Mague	ACTA CRYSTALLOGR.,SECT.E:STRUCT.REP.ONLINE,2001,57,,o68	P21/c	1D	[0,1,0]	K02	2C1
QASNEF	C23 H26 N1 O3 P1 S1	4-Butyl-N-((2-methoxyphenyl)(phenyl)phosphino)benzenesulfonamide.	F.W.Patureau,M.A.Siegler,A.L.Spek,A.J.Sandee,S.Juge,S.Aziz,A.Berkessel,J.N.H.Reek	EUR.J.INORG.CHEM.,2012,,,496	P-1	0D		B01	1M2-1
QEDGOX	C13 H12 N2 O4 S1	N-(4-Methylphenyl)-2-nitrobenzenesulfonamide.	U.Chaithanya,S.Foro,B.T.Gowda	ACTA CRYSTALLOGR.,SECT.E:STRUCT.REP.ONLINE,2012,68,,o2745	P21/c	0D		B01	1M2-1
QEDKUH	C13 H12 N2 O4 S1	N-(2-Methylphenyl)-4-nitrobenzenesulfonamide.	U.Chaithanya,S.Foro,B.T.Gowda	ACTA CRYSTALLOGR.,SECT.E:STRUCT.REP.ONLINE,2012,68,,o2766	P21/n	0D		B01	1M2-1
QEDLAO	C25 H29 Br1 N4 O3 S2	N-(2-((5-Bromo-2-(piperidin-1-yl)pyrimidin-4-yl)sulfanyl)-4-methoxyphenyl)-2,4,6-trimethylbenzenesulfonamide.	M.Kumar,L.Mallesha,M.A.Sridhar,K.Kapoor,V.K.Gupta,R.Kant	ACTA CRYSTALLOGR.,SECT.E:STRUCT.REP.ONLINE,2012,68,,o2767	P21/n	0D		B01	1M2-1
QEDQOH	C21 H20 Br1 Cl1 N4 O4 S2	N-(2-((5-Bromo-2-(morpholin-4-yl)pyrimidin-4-yl)sulfanyl)-4-methoxyphenyl)-4-chlorobenzenesulfonamide.	M.Kumar,L.Mallesha,M.A.Sridhar,K.Kapoor,V.K.Gupta,R.Kant	ACTA CRYSTALLOGR.,SECT.E:STRUCT.REP.ONLINE,2012,68,,o2800	P21/n	1D	[1,0,0]	B2	2C1
QIKMIG	C14 H21 N1 O3 S3	N-(2-Hydroxy-4,4-bis(methylsulfanyl)cyclopentyl)-4-methylbenzenesulfonamide.	G.Harms,E.Schaumann,G.Adiwidjaja	SYNTHESIS,2001,,,577	P212121	1D	[1,0,0]	K02	2C1
QOQKUD	C36 H29 N1 O2 S1	N-((1-(Diphenylmethylene)-3-phenyl-1H-inden-2-yl)methyl)-4-methylbenzenesulfonamide.	Jian-Mei Lu,Zhi-Bin Zhu,Min Shi	Chem.-Eur.J.,2009,15,,963	P-1	0D		B01	1M2-1
QORSOG	C16 H15 N3 O5 S1	N-(6-(((2E)-2-Benzylidenehydrazinyl)carbonyl)-1,3-benzodioxol-5-yl)methanesulfonamide.	J.L.M.Tributino,C.D.Duarte,R.S.Correa,A.C.Doriguetto,J.Ellena,N.C.Romeiro,N.G.Castro,A.L.P.Miranda,E.J.Barreiro,C.A.M.Fraga	BIOORG.MED.CHEM.,2009,17,,1125	P21/c	0D		B01	1M2-1
QOSQAQ	C30 H42 N2 O6 S1	2-t-Butyloxycarbonyl-7-hydroxy-7-benzyloxyethyl-8-p-toluenesulfonamide-heptahydroisoquinoline.	J.S.Clark,R.J.Townsend,A.J.Blake,S.J.Teat,A.Johns	TETRAHEDRON LETT.,2001,42,,3235	P21	2D	(0,0,1)	K4	sql/Shubnikov tetragonal plane net
QOTMUI	C14 H13 N1 O4 S1	(2R)-2-Benzenesulfonamido-2-phenylethanoic acid.	M.N.Arshad,M.N.Tahir,I.U.Khan,M.Shafiq,S.Ahmad	ACTA CRYSTALLOGR.,SECT.E:STRUCT.REP.ONLINE,2009,65,,o940	P212121	1D	[1,0,0]	B2	2C1
QOTMUI01	C14 H13 N1 O4 S1	(2R)-2-Benzenesulfonamido-2-phenylethanoic acid.	I.U.Khan,S.Sharif,M.N.Arshad,Ejaz,M.Idrees	ACTA CRYSTALLOGR.,SECT.E:STRUCT.REP.ONLINE,2009,65,,o2436	P21	1D	[1,0,0]	B2	2C1
QQQAUD01	C11 H13 Cl1 F3 N3 O4 S3	6-Chloro-2-methyl-3-(((2,2,2-trifluoroethyl)sulfanyl)methyl)-3,4-dihydro-2H-1, 2,4-benzothiadiazine-7-sulfonamide 1,1-dioxide.	T.Gelbrich,M.F.Haddow,U.J.Griesser	ACTA CRYSTALLOGR.,SECT.E:STRUCT.REP.ONLINE,2010,66,,o1663	Cc	2D	(1,0,-1)	K4	sql/Shubnikov tetragonal plane net
QQQAUG15	C7 H6 Cl1 N3 O4 S2	6-Chloro-4H-1,2,4-benzothiadiazine-7-sulfonamide 1,1-dioxide.	I.D.H.Oswald,A.R.Lennie,C.R.Pulham,K.Shankland	CRYSTENGCOMM,2010,12,,2533	P1	3D		H82	bct; 10/3/t1; sqc8
QQQAUG16	C7 H6 Cl1 N3 O4 S2	6-Chloro-4H-1,2,4-benzothiadiazine-7-sulfonamide 1,1-dioxide.	I.D.H.Oswald,A.R.Lennie,C.R.Pulham,K.Shankland	CRYSTENGCOMM,2010,12,,2533	P1	3D		H82	bct; 10/3/t1; sqc8
QQQAUG17	C7 H6 Cl1 N3 O4 S2	6-Chloro-4H-1,2,4-benzothiadiazine-7-sulfonamide 1,1-dioxide.	I.D.H.Oswald,A.R.Lennie,C.R.Pulham,K.Shankland	CRYSTENGCOMM,2010,12,,2533	P1	3D		H82	bct; 10/3/t1; sqc8
QUYTIO	C13 H14 N2 O4 S2	4,4'-methylenebis(benzenesulfonamide).	T.Gelbrich,M.F.Haddow,U.J.Griesser	ACTA CRYSTALLOGR.,SECT.E:STRUCT.REP.ONLINE,2010,66,,o1619	P21	2D	(1,0,2)	P6	hxl/Shubnikov plane net (3,6)
QUYYEP	C12 H8 Cl3 N1 O2 S1	2,4-Dichloro-N-(2-chlorophenyl)benzenesulfonamide.	B.T.Gowda,S.Foro,P.G.Nirmala,H.Fuess	ACTA CRYSTALLOGR.,SECT.E:STRUCT.REP.ONLINE,2010,66,,o1641	Pbcn	0D		B01	1M2-1
QUZHEZ	C15 H17 N1 O3 S1	N-(3-Ethoxyphenyl)-4-methylbenzenesulfonamide.	Aziz-ur-Rehman,A.Siddiqa,M.Akkurt,M.A.Abbasi,M.Jahangir,I.U.Khan	ACTA CRYSTALLOGR.,SECT.E:STRUCT.REP.ONLINE,2010,66,,o1682	P21/c	0D		B01	1M2-1
QUZLAZ	C13 H11 Cl2 N1 O2 S1	4-Chloro-N-(3-chlorophenyl)-2-methylbenzenesulfonamide.	B.T.Gowda,S.Foro,P.G.Nirmala,H.Fuess	ACTA CRYSTALLOGR.,SECT.E:STRUCT.REP.ONLINE,2010,66,,o1702	P21/c	0D		B01	1M2-1
RABKIP	C24 H23 N3 O3 S1	4-Methyl-N-[2-(5-oxo-1-(pyridin-2-yl)-2,5-dihydro-1H-pyrrol-3-yl)-1-phenylethyl]benzenesulfonamide.	M.Lautens,Wooseok Han,J.Hung-Chang Liu	J.AM.CHEM.SOC.,2003,125,,4028	P21/c	0D		B01	1M2-1
RATKIH	C20 H23 N1 O2 S1	N-(2-(Bicyclo(2.2.1)hept-2-yl)phenyl)-4-methylbenzenesulfonamide.	L.Ackermann,K.Polborn	PRIVATE COMMUNICATION,2005,,,	P21/c	0D		B01	1M2-1
RAWCUP	C25 H24 N2 O5 S2	N-(2-(6-Benzoyl-5-methyl-1-(methylsulfonyl)-1H-indol-2-yl)-4-methylphenyl)methanesulfonamide.	A.Nakhi,B.Prasad,U.Reddy,R.M.Rao,S.Sandra,R.Kapavarapu,D.Rambabu,G.R.Krishna,C.M.Reddy,K.Ravada,P.Misra,J.Iqbal,M.Pal	MedChemComm,2011,2,,1006	P-1	0D		B01	1M2-1
RAWMAF	C24 H23 Br1 N2 O5 S1	N-((2S,3R,4R)-2-(3-Bromophenyl)-3-nitro-3,4-dihydro-2H-chromen-4-yl)-2,4,6-trimethylbenzenesulfonamide.	Wenduan Hou,Bo Zheng,Jun Chen,Yungui Peng	Org.Lett.,2012,14,,2378	P21	1D	[0,1,0]	B2	2C1
RAXXUL	C22 H22 F1 N1 O5 S1	N-((2-Fluorophenyl)(2-hydroxy-4,6-dimethoxyphenyl)methyl)-4-methylbenzenesulfonamide.	Guo-Xing Li,Jin Qu	CHEM.COMMUN.,2012,48,,5518	P212121	1D	[0,1,0]	B2	2C1
RIBQAV	C15 H16 N4 O5 S1	anti,anti-4-(1,3-Dimethyl-3-phenylureido)-3-nitrobenzenesulfonamide.	Cheol-Min Park,Tetsuro Oie,A.M.Petros,Haichao Zhang,P.M.Nimmer,R.F.Henry,S.W.Elmore	J.AM.CHEM.SOC.,2006,128,,16206	Pbca	1D	[0,0,1]	B2	2C1
RIBQEZ	C14 H14 N4 O5 S1	syn,syn-4-(1-Methyl-3-phenylureido)-3-nitrobenzenesulfonamide.	Cheol-Min Park,Tetsuro Oie,A.M.Petros,Haichao Zhang,P.M.Nimmer,R.F.Henry,S.W.Elmore	J.AM.CHEM.SOC.,2006,128,,16206	P21/n	3D		G41	bnn hexagonal BN; 5/4/h5; sqc12
RIBQID	C14 H14 N4 O5 S1	syn,anti-4-(3-Methyl-3-phenylureido)-3-nitrobenzenesulfonamide.	Cheol-Min Park,Tetsuro Oie,A.M.Petros,Haichao Zhang,P.M.Nimmer,R.F.Henry,S.W.Elmore	J.AM.CHEM.SOC.,2006,128,,16206	P21/c	2D	(1,0,0)	K21	hcb; Shubnikov hexagonal plane net/(6,3)
RIHGOF	C6 H5 Cl2 N1 O2 S1	3,4-Dichlorobenzenesulfonamide.	B.T.Gowda,K.S.Babitha,I.Svoboda,H.Fuess	ACTA CRYSTALLOGR.,SECT.E:STRUCT.REP.ONLINE,2007,63,,o3245	P21/c	2D	(1,0,0)	K21	hcb; Shubnikov hexagonal plane net/(6,3)
RIQLOT	C13 H15 F3 N4 O3 S2	(+-)-N-(3-(4-Amino-2-oxo-1-(tetrahydro-2-thienyl)-1,2-dihydropyrimidin-5-yl)prop-2-yn-1-yl)-2,2,2-trifluoroethanesulfonamide.	A.K.H.Hirsch,S.Lauw,P.Gersbach,W.B.Schweizer,F.Rohdich,W.Eisenreich,A.Bacher,F.Diederich	ChemMedChem,2007,2,,806	C2/c	1D	[0,1,0]	G002	2C1
RIYXED	C14 H13 F2 N1 O4 S1	N-(3,4-Difluorophenyl)-3,4-dimethoxybenzenesulfonamide.	H.P.You,B.H.Han,S.K.Kang,C.K.Sung,S.O.Kang	ACTA CRYSTALLOGR.,SECT.E:STRUCT.REP.ONLINE,2008,64,,o994	P21/c	1D	[0,1,0]	B2	2C1
ROKLEJ	C12 H23 N1 O3 S1	N-(6-Methoxy-2-methyl-1-cyclohexen-1-yl)-2-methyl-2-propanesulfonamide.	S.C.Coote,S.P.Moore,P.O'Brien,A.C.Whitwood,J.Gilday	J.ORG.CHEM.,2008,73,,7852	P21/n	0D		B01	1M2-1
RORROF	C14 H21 N1 O4 S1	(2S,5S,1'S)-5-Hydroxymethyl-2-(1'-p-toluenesulfonamidoethyl)-tetrahydrofuran.	K.Harms,U.Koert,H.Wagner	Z.KRISTALLOGR.,1997,212,,238	P21	2D	(0,0,1)	K4	sql/Shubnikov tetragonal plane net
ROZQAZ	C23 H23 N3 O6 S1	(-)-(2S,3S,4R)-2-Hydroxy-3-methyl-4-(nitrophenylsulfonamido)-N,4-diphenylbutanamide.	Yingjie Xu,Gang Lu,S.Matsunaga,M.Shibasaki	Angew.Chem.,Int.Ed.,2009,48,,3353	P212121	1D	[1,0,0]	K4	SP 1-periodic net (3,6)(1,2)
RUGMAI	C13 H11 N1 O4 S1	4-Benzenesulfonamidobenzoic acid.	H.M.A.Sharif,G.-Y.dong,M.N.Arshad,I.U.Khan	ACTA CRYSTALLOGR.,SECT.E:STRUCT.REP.ONLINE,2009,65,,o3086	P21/c	1D	[1,0,0]	K21	SP 1-periodic net (4,4)(0,2)
RUHQER	C38 H32 Br1 N1 O2 S1	N-(1-(4-Bromophenyl)-2-(2,2-diphenylvinyl)-4-phenyl-2,4-pentadien-1-yl)-4-methylbenzenesulfonamide.	Jian-Mei Lu,Min Shi	Chem.-Eur.J.,2009,15,,6065	P21/c	0D		B01	1M2-1
RUJQUJ	C14 H15 N1 O2 S1	4-Methyl-N-(3-methylphenyl)benzenesulfonamide.	P.G.Nirmala,B.T.Gowda,S.Foro,H.Fuess	ACTA CRYSTALLOGR.,SECT.E:STRUCT.REP.ONLINE,2009,65,,o3208	C2/c	0D		B01	1M2-1
RUJREU	C15 H17 N1 O2 S1	2,4-Dimethyl-N-(2-methylphenyl)benzenesulfonamide.	P.G.Nirmala,B.T.Gowda,S.Foro,H.Fuess	ACTA CRYSTALLOGR.,SECT.E:STRUCT.REP.ONLINE,2009,65,,o3210	P-1	0D		B01	1M2-1
RUSGOC	C36 H29 N1 O2 S1	(E)-N-(2-(1,2-Diphenylvinyl)-3-phenyl-1H-inden-1-yl)-4-methylbenzenesulfonamide.	Shaoyin Wang,Yuanxun Zhu,Yanguang Wang,Ping Lu	Org.Lett.,2009,11,,2615	C2/c	0D		B01	1M2-1
RUWQAC	C26 H28 N2 O3 S1	N-(1-Benzyl-3-isobutyl-2-oxo-2,3-dihydro-1H-indol-3-yl)-4-methylbenzenesulfonamide.	T.Bui,M.Borregan,C.F.Barbas III	J.ORG.CHEM.,2009,74,,8935	P212121	1D	[0,1,0]	B2	2C1
RUXZUG	C17 H21 N1 O3 S1	N-((1S,2R)-2-Hydroxy-1-phenylbutyl)-4-methylbenzenesulfonamide.	M.K.Ghorai,A.Kumar,D.P.Tiwari	J.ORG.CHEM.,2010,75,,137	P21	1D	[0,1,0]	K4	SP 1-periodic net (3,6)(1,2)
RUZJAY	C13 H21 N3 O5 S2	N-(3-Morpholinopropyl)benzene-1,4-disulfonamide.	M.Remko,J.Kozisek,J.Semanova,F.Gregan	J.MOL.STRUCT.,2010,973,,18	P21/n	2D	(1,0,1)	K21	hcb; Shubnikov hexagonal plane net/(6,3)
SABFOS	C14 H16 N2 O3 S1	4-(2-[(Z)-(5-Methyl-2-furyl)methylideneamino]ethyl)benzenesulfonamide.	K.Mahmood,M.Yaqub,M.N.Tahir,Z.Shafiq,A.M.Qureshi	ACTA CRYSTALLOGR.,SECT.E:STRUCT.REP.ONLINE,2010,66,,o2436	P-1	1D	[0,1,0]	K21	SP 1-periodic net (4,4)(0,2)
SADHEM	C18 H17 N3 O5 S1	4-((2-Hydroxy-3-methoxybenzylidene)amino)-N-(5-methyl-1,2-oxazol-3-yl)benzenesulfonamide.	M.Yildiz,H.Unver,D.Erdener,N.O.Iskeleli	J.Chem.Cryst.,2010,40,,691	P21/c	0D		B01	1M2-1
SAGGIS	C22 H24 F1 N3 O4 S1	N-(3-(4-Fluorobenzyl)-2,4-dioxo-1,3-diazaspiro[4.5]dec-8-yl)-2-methylbenzenesulfonamide.	S.Jeyaseelan,M.Vinduvahini,M.Madaiah,S.Bhattacharya,H.D.Revanasiddappa	ACTA CRYSTALLOGR.,SECT.E:STRUCT.REP.ONLINE,2012,68,,o105	P21/c	1D	[1,0,1]	K02	2C1
SAGXUV	C23 H26 F1 N3 O6 S1	N-(3-[2-(4-Fluorophenoxy)ethyl]-2,4-dioxo-1,3-diazaspiro[4.5]decan-7-yl)-4-methoxybenzenesulfonamide.	M.Vinduvahini,S.Jeyaseelan,J.Shylajakumari,H.D.Revanasiddappa,V.B.Devaru	ACTA CRYSTALLOGR.,SECT.E:STRUCT.REP.ONLINE,2012,68,,o194	P21/c	2D	(1,0,0)	K21	hcb; Shubnikov hexagonal plane net/(6,3)
SAQQEG	C18 H21 N1 O2 S2	(E)-N-Cyclohexyl-1-phenyl-2-(2-thienyl)vinylsulfonamide.	T.Iwama,T.Kataoka,O.Muraoka,G.Tanabe	TETRAHEDRON,1998,54,,5507	Pbca	1D	[0,0,1]	B2	2C1
SARBIW	C15 H22 Cl1 N3 O3 S1	(4-Amino-5-chloro-2-methoxysulfonamido)deoxytropine.	S.Collin,D.P.Vercauteren,G.Evrard,F.Durant	J.CHEM.SOC.,PERKIN TRANS.2,1989,,,407	P21/c	2D	(1,0,0)	K4	sql/Shubnikov tetragonal plane net
SAYZEY	C12 H10 Cl1 N1 O2 S1	N-(4-Chlorophenyl)benzenesulfonamide.	G.L.Perlovich,V.V.Tkachev,K.-J.Schaper,O.A.Raevsky	ACTA CRYSTALLOGR.,SECT.E:STRUCT.REP.ONLINE,2006,62,,o376	Pbca	1D	[0,1,0]	B2	2C1
SAZMUC	C13 H12 N2 O4 S1	4-Methyl-N-(3-nitrophenyl)benzenesulfonamide.	Jun-De Xing,Guo-Yi Bai,Tao Zeng,Jiang-Sheng Li	ACTA CRYSTALLOGR.,SECT.E:STRUCT.REP.ONLINE,2006,62,,o79	P21/n	1D	[1,0,1]	B2	2C1
SEGYAF	C23 H30 N2 O3 S1	(S,R)-Tetrahydro-\b-carboline camphorsulfonamide.	M.Bandini,A.Melloni,F.Piccinelli,R.Sinisi,S.Tommasi,A.Umani-Ronchi	J.AM.CHEM.SOC.,2006,128,,1424	P212121	1D	[1,0,0]	B2	2C1
SESNUA	C11 H17 N1 O2 S1	N-t-Butyl-4-toluenesulfonamide.	Xiao-Lin Zhang,Yong-Ping Yan,Liang Ding,Lai-Tao Luo	ACTA CRYSTALLOGR.,SECT.E:STRUCT.REP.ONLINE,2006,62,,o5809	P21/c	0D		B01	1M2-1
SFDMOX04	C12 H14 N4 O4 S1	4-(4'-Aminobenzenesulfonamido)-2,6-dimethoxypyrimidine.	A.Shvelashvili,M.Tskitishvili,M.Kvitsiani,V.Belsky	PRIVATE COMMUNICATION,2002,,,	P-1	1D	[1,1,0]	K21	SP 1-periodic net (4,4)(0,2)
SIKDIA	C22 H20 N2 O3 S2	(2S,(S)S)-N-(Cyano(2-((4-methylphenyl)sulfinyl)phenyl)methyl)-4-methylbenzenesulfonamide.	J.L.G.Ruano,A.M.Martin-Castro,F.Tato,I.Alonso	J.ORG.CHEM.,2007,72,,5994	P21	1D	[0,1,0]	B2	2C1
SIKHEA	C50 H40 N5 O10 P3 S2	2,2-bis(N-(2-Oxyphenyl)-4-methylbenzenesulfonamide-O)-(4,4:6,6-bis(2',2''-biphenolato)-O,O')-cyclotriphosphazene.	E.W.Ainscough,A.M.Brodie,R.J.Davidson,C.A.Otter	Inorg.Chem.Commun.,2007,10,,1005	P21/n	1D	[1,0,0]	K02	2C1
SINKOP	C21 H22 F1 N1 O6 S1	Dimethyl9(S)-fluoro-4(S)-(p-toluenesulfonamido)tetracyclo(5.3.0.0^2,10^.0^3,8^)deca-5-ene-5,6-dicarboxylate.	K.A.Potekhin,A.V.Maleev,Yu.T.Struchkov,A.I.Glinskii,V.N.Semerikov,V.V.Zhdankin	DOKL.AKAD.NAUK SSSR(RUSS.)(PROC.NAT.ACAD.SCI.USSR),1990,311,,373	P-1	0D		B01	1M2-1
SITKEM	C16 H17 Cl1 N2 O4 S1	N-(2-Chloro-2-nitro-1-phenylpropyl)-4-methylbenzenesulfonamide.	Sanjun Zhi,Tengfei Li,Guanghui An,Yi Pan	ACTA CRYSTALLOGR.,SECT.E:STRUCT.REP.ONLINE,2008,64,,o357	Pbca	1D	[1,0,0]	B2	2C1
SITRUJ	C12 H23 N1 O2 S1	N-(6,6-Dimethylbicyclo(3.1.0)hexan-2-yl)-2-methylpropane-2-sulfonamide.	D.M.Hodgson,P.G.Humphreys,S.M.Miles,C.A.J.Brierley,J.G.Ward	J.ORG.CHEM.,2007,72,,10009	Pna21	1D	[0,0,1]	B2	2C1
SIWMIV	C18 H30 F3 N1 O5 S1	(2R,3R)-N-(3-t-Butoxy-4,4,4-trifluoro-1-hydroxybutan-2-yl)-1-(7,7-dimethyl-2-oxobicyclo[2.2.1]hept-1-yl)methanesulfonamide.	Nu Xiao,Zhong-Xing Jiang,Y.B.Yu	BIOPOLYMERS,2007,88,,781	P212121	1D	[1,0,0]	B2	2C1
SIZBUZ	C18 H30 F3 N1 O5 S1	(2S,3S)-N-(3-tert-Butoxy-4,4,4-trifluoro-1-hydroxybutan-2-yl)-1-(7,7-dimethyl-2-oxobicyclo[2.2.1]hept-1-yl)methanesulfonamide.	Nu Xiao,Zhong-Xing Jiang,Y.B.Yu	BIOPOLYMERS,2007,88,,781	P212121	1D	[1,0,0]	B2	2C1
SLFNMB03	C10 H11 N3 O3 S1	3-(4'-Aminobenzenesulfonamido)-5-methylisoxazole.	J.Rambaud,R.Roques,S.Alberola,F.Sabon	BULL.SOC.CHIM.FR.,1980,,,56-1	C2/c	2D	(0,0,1)	K4	sql/Shubnikov tetragonal plane net
SLFNMB05	C10 H11 N3 O3 S1	3-(4-Aminobenzenesulfonamido)-5-methylisoxazole.	C.P.Price,A.L.Grzesiak,A.J.Matzger	J.AM.CHEM.SOC.,2005,127,,5512	P21/c	2D	(1,0,0)	G41	SP 2-periodic net (4,4)Ia; SnS
SLFNMB06	C10 H11 N3 O3 S1	3-(4-Aminobenzenesulfonamido)-5-methylisoxazole.	C.P.Price,A.L.Grzesiak,A.J.Matzger	J.AM.CHEM.SOC.,2005,127,,5512	P21/n	2D	(0,1,0)	K4	sql/Shubnikov tetragonal plane net
SLFNMD01	C12 H14 N4 O2 S1	4-Amino-N-(4,6-dimethyl-2-pyrimidinyl)-benzenesulfonamide.	A.K.Basak,S.K.Mazumdar,S.Chaudhuri	ACTA CRYSTALLOGR.,SECT.C:CRYST.STRUCT.COMMUN.,1983,39,,492	P21/a	2D	(0,0,1)	K4	sql/Shubnikov tetragonal plane net
SLFNMD10	C12 H14 N4 O2 S1	4-Amino-N-(4,6-dimethyl-2-pyrimidinyl)-benzenesulfonamide.	R.K.Tiwari,M.Haridas,T.P.Singh	ACTA CRYSTALLOGR.,SECT.C:CRYST.STRUCT.COMMUN.,1984,40,,655	P21/c	2D	(1,0,0)	G41	SP 2-periodic net (4.8^2)IIa or tts; Shubnikov plane net (3^2.4.3.4)
SOLKAG	C14 H12 N2 O3 S2	4-Methyl-N-(3-oxo-2,3-dihydro-1,2-benzisothiazol-2-yl)benzenesulfonamide.	C.Rizzoli,P.Vicini,M.Incerti	ACTA CRYSTALLOGR.,SECT.E:STRUCT.REP.ONLINE,2009,65,,o425	P21/n	1D	[0,1,0]	B2	2C1
SOLYOI	C8 H8 I1 N1 O4 S1	2-(2-Iodobenzenesulfonamido)acetic acid.	M.N.Arshad,I.U.Khan,M.Shafiq,A.Mukhtar	ACTA CRYSTALLOGR.,SECT.E:STRUCT.REP.ONLINE,2009,65,,o549	P-1	1D	[0,1,0]	T02	2C1
SOYPAY	C11 H15 N1 O4 S1	(2S)-Methyl 2-(p-toluenesulfonamido)propanoate.	T.Syed,S.Hameed,P.G.Jones,A.Schmidt-Meier	ACTA CRYSTALLOGR.,SECT.E:STRUCT.REP.ONLINE,2009,65,,o1300	P212121	1D	[1,0,0]	B2	2C1
SULAMD07	C6 H8 N2 O2 S1	4-Aminobenzenesulfonamide.	M.B.Hursthouse,T.L.Threlfall,S.J.Coles,S.C.Ward	University of Southampton, Crystal Structure Report Archive,1998,,,	P21/c	3D		P6	pcu alpha-Po primitive cubic; 6/4/c1; sqc1
SULAMD08	C6 H8 N2 O2 S1	4-Aminobenzenesulfonamide.	M.B.Hursthouse,T.L.Threlfall,S.J.Coles,S.C.Ward	University of Southampton, Crystal Structure Report Archive,1999,,,	Pbca	3D		P41	noz; 5/4/o7
SULAMD09	C6 H8 N2 O2 S1	4-Aminobenzenesulfonamide.	M.B.Hursthouse,T.L.Threlfall,S.J.Coles,S.C.Ward	University of Southampton, Crystal Structure Report Archive,1999,,,	P21/c	3D		P41	bnn hexagonal BN; 5/4/h5; sqc12
SULDAZ02	C10 H10 N4 O2 S1	4-Amino-N-(2-pyrimidinyl)-benzenesulfonamide.	M.K.Kokila,Puttaraja,M.V.Kulkarni,S.Thampi	ACTA CRYSTALLOGR.,SECT.C:CRYST.STRUCT.COMMUN.,1995,51,,333	P21/c	2D	(1,0,0)	K21	hcb; Shubnikov hexagonal plane net/(6,3)
SULDAZ03	C10 H10 N4 O2 S1	4-Amino-N-(2-pyrimidinyl)benzenesulfonamide.	P.A.Ajibade,G.A.Kolawole,P.O'Brien,M.Helliwell,J.Raftery	INORG.CHIM.ACTA,2006,359,,3111	P21/c	2D	(1,0,0)	K21	hcb; Shubnikov hexagonal plane net/(6,3)
SULDAZ04	C10 H10 N4 O2 S1	4-Amino-N-(pyrimidin-2-yl)benzenesulfonamide.	T.A.Mayer,M.B.Hursthouse,T.L.Threlfall,S.J.Coles	University of Southampton, Crystal Structure Report Archive,2000,,,	P21/c	2D	(1,0,0)	K21	hcb; Shubnikov hexagonal plane net/(6,3)
SULNUJ	C18 H23 N1 O4 S1	N-(4-Hydroxy-3-(1-hydroxy-3-methylbutan-2-yl)phenyl)-4-methylbenzenesulfonamide.	K.L.Jensen,P.T.Franke,L.T.Nielsen,K.Daasbjerg,K.A.Jorgensen	Angew.Chem.,Int.Ed.,2010,49,,129	P21	2D	(1,0,1)	K4	sql/Shubnikov tetragonal plane net
SULTAM	C10 H14 N2 O4 S2	Benzenesulfonamide-p-(tetrahydro-2H-1,2-thiazin-2-yl)-S,S-dioxide.	J.Aupers,C.H.Carlisle,P.F.Lindley	ACTA CRYSTALLOGR.,SECT.B:STRUCT.CRYSTALLOGR.CRYST.CHEM.,1974,30,,1228	Pca21	2D	(0,1,0)	K4	sql/Shubnikov tetragonal plane net
SULTAM01	C10 H14 N2 O4 S2	Benzenesulfonamide-p-(tetrahydro-2H-1,2-thiazin-2-yl)-S,S-dioxide.	A.Camerman,N.Camerman	CAN.J.CHEM.,1975,53,,2194	Pca21	1D	[0,0,1]	B2	2C1
SUQTUT	C23 H26 N2 O3 S3	N-(2-Methoxyethyl)-N-(2,3,4,9-tetrahydrospiro(1H-carbazole-1,2-(1,3)dithiolane)-4-yl)-benzenesulfonamide.	S.Patir,G.Okay,A.Gulce,B.Salih,T.Hokelek	J.HETEROCYCL.CHEM.,1997,34,,1239	P21/n	0D		B01	1M2-1
SUTHAZ09	C9 H9 N3 O2 S2	4-Amino-N-(2-thiazolyl)benzenesulfonamide.	T.N.Drebushchak,E.V.Boldyreva,M.A.Mikhailenko	Zh.Strukt.Khim.(Russ.)(J.Struct.Chem.),2008,49,,90	P21/c	2D	(0,0,1)	P22	sql/Shubnikov tetragonal plane net
SUTHAZ10	C9 H9 N3 O2 S2	4-Amino-N-(2-thiazolyl)benzenesulfonamide.	T.N.Drebushchak,E.V.Boldyreva,M.A.Mikhailenko	Zh.Strukt.Khim.(Russ.)(J.Struct.Chem.),2008,49,,90	P21/c	2D	(0,0,1)	P22	sql/Shubnikov tetragonal plane net
SUTHAZ13	C9 H9 N3 O2 S2	4-Amino-N-(2-thiazolyl)benzenesulfonamide.	T.N.Drebushchak,E.V.Boldyreva,M.A.Mikhailenko	Zh.Strukt.Khim.(Russ.)(J.Struct.Chem.),2008,49,,90	P21/n	2D	(1,0,1)	G22	sql/Shubnikov tetragonal plane net
SUTHAZ14	C9 H9 N3 O2 S2	4-Amino-N-(2-thiazolyl)benzenesulfonamide.	T.N.Drebushchak,E.V.Boldyreva,M.A.Mikhailenko	Zh.Strukt.Khim.(Russ.)(J.Struct.Chem.),2008,49,,90	P21/n	2D	(1,0,1)	G22	sql/Shubnikov tetragonal plane net
SUTHAZ18	C9 H9 N3 O2 S2	4-Amino-N-(thiazol-2-ylidene)benzenesulfonamide.	T.Gelbrich,D.S.Hughes,M.B.Hursthouse,T.L.Threlfall	CRYSTENGCOMM,2008,10,,1328	P21/c	2D	(0,0,1)	P22	sql/Shubnikov tetragonal plane net
SUTHAZ19	C9 H9 N3 O2 S2	4-Amino-N-(thiazol-2-ylidene)benzenesulfonamide.	T.Gelbrich,D.S.Hughes,M.B.Hursthouse,T.L.Threlfall	CRYSTENGCOMM,2008,10,,1328	P21/n	2D	(1,0,1)	G22	sql/Shubnikov tetragonal plane net
SUVGUL	C15 H21 N3 O3 S1	N-((Perhydrocyclopenta(c)pyrrol-2-yl)aminocarbonyl)-p-toluenesulfonamide.	M.Parvez,M.S.Arayne,M.K.Zaman,N.Sultana	ACTA CRYSTALLOGR.,SECT.C:CRYST.STRUCT.COMMUN.,1999,55,,74	P21/n	1D	[0,0,1]	K02	2C1
SUWZEQ	C30 H26 N2 O5 S2	4-Methyl-N-((4-(((4-methylphenyl)sulfonyl)amino)-2-phenyl-4H-chromen-3-yl)methylene)benzenesulfonamide.	J.Aleman,A.Nunez,L.Marzo,V.Marcos,C.Alvarado,J.L.G.Ruano	Chem.-Eur.J.,2010,16,,9453	P212121	1D	[1,0,0]	B2	2C1
SUWZIU	C23 H19 N1 O4 S1	(E)-N-((S)-3-Formyl-2-phenyl-4H-chromen-4-yl)-4-methylbenzenesulfonamide.	J.Aleman,A.Nunez,L.Marzo,V.Marcos,C.Alvarado,J.L.G.Ruano	Chem.-Eur.J.,2010,16,,9453	P-1	0D		B01	1M2-1
SUZRUB	C15 H17 N1 O2 S1	4-Methyl-N-[(S)-1-phenylethyl]benzenesulfonamide.	Z.Kelesoglu,Z.Gultekin ,O.Buyukgungor	ACTA CRYSTALLOGR.,SECT.E:STRUCT.REP.ONLINE,2010,66,,o2363	P21	1D	[0,1,0]	B2	2C1
TAJFUH	C17 H20 N2 O3 S1	(E)-2-(1-(2-(4-methylphenylsulfonamido)ethyliminio)ethyl)phenolate.	G.Alpaslan,H.Tanak,A.A.Agar,A.Erdonmez,S.Isik	Struct.Chem.,2010,21,,1027	P21/n	0D		B01	1M2-1
TAPSIO	C22 H19 I1 N2 O5 S1	N-(2-Iodo-1-(3-nitrophenyl)-3-oxo-3-phenylpropyl)-4-methylbenzenesulfonamide.	Yunfei Cai,Xiaohua Liu,Jun Li,Weiliang Chen,Wentao Wang,Lili Lin,Xiaoming Feng	Chem.-Eur.J.,2011,17,,14916	P21	1D	[0,1,0]	B2	2C1
TAQDOF	C9 H12 Cl1 N1 O2 S1	N-(2-Chloroethyl)-4-methylbenzenesulfonamide.	P.Tasker,A.Parkin,C.Squires,S.Parsons,D.Messenger	PRIVATE COMMUNICATION,2005,,,	P21/n	1D	[0,1,0]	B2	2C1
TAQLON	C26 H33 N3 O6 S3	1,1,1-tris(p-Toluenesulfonamidomethyl)ethane.	P.Tasker,A.Parkin,C.Squires,S.Parsons,D.Messenger	PRIVATE COMMUNICATION,2005,,,	Pna21	1D	[0,0,1]	K02	2C1
TAXQUF	C21 H18 N2 O3 S1	4-Methoxy-N-(2-phenyl-1H-indol-7-yl)benzenesulfonamide.	X.-H.Huang,Q.-F.Zhang,H.H.Y.Sung	Z.KRISTALLOGR.-NEW CRYST.STRUCT.,2005,220,,258	Pbca	1D	[1,0,0]	B2	2C1
TAXRAM	C21 H18 N2 O2 S1	4-Methyl-N-(2-phenyl-1H-indol-7-yl)benzenesulfonamide.	X.-H.Huang,Q.-F.Zhang,H.H.Y.Sung	Z.KRISTALLOGR.-NEW CRYST.STRUCT.,2005,220,,258	Pbca	1D	[1,0,0]	B2	2C1
TECHAL	C18 H11 Cl2 F3 N4 O2 S1	1-(2,6-Dichloro-4-(trifluoromethyl)phenyl)-5-(4-methylphenylsulfonamido)-1H-pyrazole-3-carbonitrile.	Ping Zhong,Xiao-Hong Zhang,Hong-Ping Xiao,Mao-Lin Hu	ACTA CRYSTALLOGR.,SECT.E:STRUCT.REP.ONLINE,2006,62,,o513	P-1	0D		B01	1M2-1
TEJTOS	C12 H16 N2 O4 S1	N-cyclohexyl-2-nitrobenzenesulfonamide.	Yu-Ye Yu	ACTA CRYSTALLOGR.,SECT.E:STRUCT.REP.ONLINE,2006,62,,o2263	P41212	1D	[0,1,0];[1,0,0]	B2	2C1
TELZUF	C17 H17 N3 O3 S1	N-(2-(1-Hydrazonoethyl)-3-benzofuranyl)-p-toluenesulfonamide.	F.Bachechi,V.M.Coiro,M.Delfini	ACTA CRYSTALLOGR.,SECT.C:CRYST.STRUCT.COMMUN.,1996,52,,2915	P21/n	1D	[0,0,1]	B2	2C1
TEQYUK	C12 H11 N1 O2 S1	M-(-)-N-Phenylbenzenesulfonamide.	T.Kato,I.Okamoto,A.Tanatani,T.Hatano,M.Uchiyama,H.Kagechika,H.Masu,K.Katagiri,M.Tominaga,K.Yamaguchi,I.Azumaya	Org.Lett.,2006,8,,5017	P43212	1D	[1,0,0];[0,1,0]	B2	2C1
TEQYUK01	C12 H11 N1 O2 S1	N-Phenylbenzenesulfonamide.	G.L.Perlovich,A.M.Ryzhakov,V.V.Tkachev,L.Kr.Hansen	CRYST.GROWTH DES.,2011,11,,1067	P43212	1D	[0,1,0];[1,0,0]	B2	2C1
TEQZAR	C13 H13 N1 O3 S1	M-(-)-N-Phenyl-4-methoxybenzenesulfonamide.	T.Kato,I.Okamoto,A.Tanatani,T.Hatano,M.Uchiyama,H.Kagechika,H.Masu,K.Katagiri,M.Tominaga,K.Yamaguchi,I.Azumaya	Org.Lett.,2006,8,,5017	P212121	1D	[1,0,0]	B2	2C1
TEWCAA	C12 H11 N1 O2 S1	P-(+)-N-Phenylbenzenesulfonamide.	T.Kato,I.Okamoto,A.Tanatani,T.Hatano,M.Uchiyama,H.Kagechika,H.Masu,K.Katagiri,M.Tominaga,K.Yamaguchi,I.Azumaya	Org.Lett.,2006,8,,5017	P41212	1D	[0,1,0];[1,0,0]	B2	2C1
TEWCEE	C13 H13 N1 O3 S1	P-(+)-N-Phenyl-4-methoxybenzenesulfonamide.	T.Kato,I.Okamoto,A.Tanatani,T.Hatano,M.Uchiyama,H.Kagechika,H.Masu,K.Katagiri,M.Tominaga,K.Yamaguchi,I.Azumaya	Org.Lett.,2006,8,,5017	P212121	1D	[1,0,0]	B2	2C1
TIBPAW	C6 H6 N2 O4 S1	2-Nitrobenzenesulfonamide.	Hua-Long Cheng,Shu-Qin Zhang,Chun-Fang Huang	ACTA CRYSTALLOGR.,SECT.E:STRUCT.REP.ONLINE,2007,63,,o1979	Cc	2D	(0,1,0)	K4	sql/Shubnikov tetragonal plane net
TIGLOL	C8 H12 N2 O4 S2	4,6-Dimethylbenzene-1,3-disulfonamide.	B.T.Gowda,K.S.Babitha,M.Tokarcik,J.Kozisek,H.Fuess	ACTA CRYSTALLOGR.,SECT.E:STRUCT.REP.ONLINE,2007,63,,o3361	Pbca	3D		H42	cco-6-Pbcm
TIHVUC	C12 H9 Br2 N1 O2 S1	4,4'-Dibromobenzenesulfonamidobenzene.	T.Gelbrich,M.B.Hursthouse,T.L.Threlfall	ACTA CRYSTALLOGR.,SECT.B:STRUCT.SCI.,2007,63,,621	R-3	0D		B01	1M2-1
TIHWEN	C12 H9 Br1 I1 N1 O2 S1	4-Iodo-4'-bromobenzenesulfonamidobenzene.	T.Gelbrich,M.B.Hursthouse,T.L.Threlfall	ACTA CRYSTALLOGR.,SECT.B:STRUCT.SCI.,2007,63,,621	R-3	0D		B01	1M2-1
TIHWIR	C14 H10 Cl1 N1 O2 S1	4-Ethynyl-4'-chlorobenzenesulfonamidobenzene.	T.Gelbrich,M.B.Hursthouse,T.L.Threlfall	ACTA CRYSTALLOGR.,SECT.B:STRUCT.SCI.,2007,63,,621	R-3	0D		B01	1M2-1
TIHXAK	C12 H9 Cl1 I1 N1 O2 S1	4-Iodo-4'-chlorobenzenesulfonamidobenzene.	T.Gelbrich,M.B.Hursthouse,T.L.Threlfall	ACTA CRYSTALLOGR.,SECT.B:STRUCT.SCI.,2007,63,,621	R-3	0D		B01	1M2-1
TIHXEO	C13 H9 Br1 N2 O2 S1	4-Bromo-4'-cyanobenzenesulfonamidobenzene.	T.Gelbrich,M.B.Hursthouse,T.L.Threlfall	ACTA CRYSTALLOGR.,SECT.B:STRUCT.SCI.,2007,63,,621	R-3	0D		B01	1M2-1
TIHXOY	C13 H9 Cl1 N2 O2 S1	4-Chloro-4'-cyanobenzenesulfonamidobenzene.	T.Gelbrich,M.B.Hursthouse,T.L.Threlfall	ACTA CRYSTALLOGR.,SECT.B:STRUCT.SCI.,2007,63,,621	R-3	0D		B01	1M2-1
TIHXUE	C13 H9 I1 N2 O2 S1	4-Iodo-4'-cyanobenzenesulfonamidobenzene.	T.Gelbrich,M.B.Hursthouse,T.L.Threlfall	ACTA CRYSTALLOGR.,SECT.B:STRUCT.SCI.,2007,63,,621	R-3	0D		B01	1M2-1
TIHYEP	C12 H9 Br1 F1 N1 O2 S1	4-Bromo-4'-fluorobenzenesulfonamidobenzene.	T.Gelbrich,M.B.Hursthouse,T.L.Threlfall	ACTA CRYSTALLOGR.,SECT.B:STRUCT.SCI.,2007,63,,621	R-3	0D		B01	1M2-1
TIHYOZ	C12 H9 Cl1 F1 N1 O2 S1	4-Chloro-4'-fluorobenzenesulfonamidobenzene.	T.Gelbrich,M.B.Hursthouse,T.L.Threlfall	ACTA CRYSTALLOGR.,SECT.B:STRUCT.SCI.,2007,63,,621	R-3	0D		B01	1M2-1
TIHYUF	C12 H9 F2 N1 O2 S1	4,4'-Difluorobenzenesulfonamidobenzene.	T.Gelbrich,M.B.Hursthouse,T.L.Threlfall	ACTA CRYSTALLOGR.,SECT.B:STRUCT.SCI.,2007,63,,621	R-3	0D		B01	1M2-1
TIHZAM	C12 H9 F1 I1 N1 O2 S1	4-Iodo-4'-fluorobenzenesulfonamidobenzene.	T.Gelbrich,M.B.Hursthouse,T.L.Threlfall	ACTA CRYSTALLOGR.,SECT.B:STRUCT.SCI.,2007,63,,621	R-3	0D		B01	1M2-1
TIHZOA	C13 H12 Cl1 N1 O2 S1	4-Chloro-4'-methylbenzenesulfonamidobenzene.	T.Gelbrich,M.B.Hursthouse,T.L.Threlfall	ACTA CRYSTALLOGR.,SECT.B:STRUCT.SCI.,2007,63,,621	R-3	0D		B01	1M2-1
TIHZUG	C13 H12 I1 N1 O2 S1	4-Iodo-4'-methylbenzenesulfonamidobenzene.	T.Gelbrich,M.B.Hursthouse,T.L.Threlfall	ACTA CRYSTALLOGR.,SECT.B:STRUCT.SCI.,2007,63,,621	R-3	0D		B01	1M2-1
TIJBAQ	C13 H12 I1 N1 O3 S1	4-Iodo-4'-methoxybenzenesulfonamidobenzene.	T.Gelbrich,M.B.Hursthouse,T.L.Threlfall	ACTA CRYSTALLOGR.,SECT.B:STRUCT.SCI.,2007,63,,621	R-3	0D		B01	1M2-1
TIYXII	C10 H17 N1 O2 S1	(+)-trans-Camphenesulfonamide.	F.A.Davis,R.Boyd,Ping Zhou,N.F.Abdul-Malik,P.J.Carroll	TETRAHEDRON LETT.,1996,37,,3267	P212121	1D	[1,0,0]	K02	2C1
TSCHOL	C34 H55 N1 O3 S1	3\b-(Toluene-p-sulfonamido)-5\a-cholestan-2\b-ol.	G.M.L.Cragg,P.A.McCallum,L.R.Nassimbeni,A.L.Rodgers,J.C.van Niekerk	S.Afr.J.Chem.,1979,32,,97	P21	1D	[0,1,0]	K4	SP 1-periodic net (3,6)(1,2)
TUDTOB	C17 H23 N1 O2 S1	(+-)-N-(1,8(10)-Menthadien-3-yl)-toluenesulfonamide.	A.Stepien,A.M.Osinska	ACTA CRYSTALLOGR.,SECT.C:CRYST.STRUCT.COMMUN.,1997,53,,519	P21/c	0D		B01	1M2-1
TUNROK	C14 H12 Cl1 N1 O3 S1	2-Chloro-N-(2-methylbenzoyl)benzenesulfonamide.	P.A.Suchetan,B.T.Gowda,S.Foro,H.Fuess	ACTA CRYSTALLOGR.,SECT.E:STRUCT.REP.ONLINE,2010,66,,o1281	P21/n	0D		B01	1M2-1
TUNRUQ	C14 H14 Cl1 N1 O2 S1	N-(2-Chlorophenyl)-2,4-dimethylbenzenesulfonamide.	B.T.Gowda,S.Foro,P.G.Nirmala,H.Fuess	ACTA CRYSTALLOGR.,SECT.E:STRUCT.REP.ONLINE,2010,66,,o1282	Pbcn	0D		B01	1M2-1
TUNTIG	C14 H12 Cl1 N1 O3 S1	2-Chloro-N-(3-methylbenzoyl)benzenesulfonamide.	P.A.Suchetan,B.T.Gowda,S.Foro,H.Fuess	ACTA CRYSTALLOGR.,SECT.E:STRUCT.REP.ONLINE,2010,66,,o1292	Pbca	0D		B01	1M2-1
TUQDIT	C14 H12 Cl1 N1 O3 S1	2-Chloro-N-(4-methylbenzoyl)benzenesulfonamide.	B.T.Gowda,S.Foro,P.A.Suchetan,H.Fuess	ACTA CRYSTALLOGR.,SECT.E:STRUCT.REP.ONLINE,2010,66,,o1466	P21/n	0D		B01	1M2-1
TUQDOZ	C13 H9 Cl2 N1 O3 S1	4-Chloro-N-(2-chlorobenzoyl)benzenesulfonamide.	B.T.Gowda,S.Foro,P.A.Suchetan,H.Fuess	ACTA CRYSTALLOGR.,SECT.E:STRUCT.REP.ONLINE,2010,66,,o1467	P-1	0D		B01	1M2-1
TUQKUM	C14 H12 Cl1 N1 O3 S1	4-Chloro-N-(4-methylbenzoyl)benzenesulfonamide.	P.A.Suchetan,B.T.Gowda,S.Foro,H.Fuess	ACTA CRYSTALLOGR.,SECT.E:STRUCT.REP.ONLINE,2010,66,,o1501	Pbca	1D	[0,1,0]	B2	2C1
TUQLAT	C15 H15 N1 O3 S1	4-Methyl-N-(2-methylbenzoyl)benzenesulfonamide.	B.T.Gowda,S.Foro,P.A.Suchetan,H.Fuess	ACTA CRYSTALLOGR.,SECT.E:STRUCT.REP.ONLINE,2010,66,,o1502	P-1	0D		B01	1M2-1
TUQMIC	C15 H15 N1 O3 S1	4-Methyl-N-(4-methylbenzoyl)benzenesulfonamide.	P.A.Suchetan,B.T.Gowda,S.Foro,H.Fuess	ACTA CRYSTALLOGR.,SECT.E:STRUCT.REP.ONLINE,2010,66,,o1510	C2/c	0D		B01	1M2-1
TUYBIY	C12 H12 N2 O3 S1	N-(2-Phenoxy-3-pyridinyl)methanesulfonamide.	F.Julemont,X.de Leval,C.Michaux,J.Damas,C.Charlier,F.Durant,B.Pirotte,J.-M.Dogne	J.Med.Chem.,2002,45,,5182	P21/n	0D		B01	1M2-1
UBIXAG	C12 H17 N3 O4 S1	N-(2-Aminocyclohexyl)-4-nitrobenzenesulfonamide.	A.Barron-Jaime,O.F.Narvaez-Garayzar,J.Gonzalez,V.Ibarra-Galvan,G.Aguirre,M.Parra-Hake,D.Chavez,R.Somanathan	CHIRALITY,2011,23,,178	P212121	1D	[1,0,0]	B2	2C1
UCAZEE	C19 H12 F5 N1 O2 S1	2-p-toluenesulfonamide-2',3',4',5',6'-pentafluorobiphenyl.	O.B.Berryman,F.Hof,M.J.Hynes,D.W.Johnson	CHEM.COMMUN.,2006,,,506	P-1	0D		B01	1M2-1
UCUFAA	C10 H16 N2 O2 S1	N-(3-Aminopropyl)-4-methylbenzenesulfonamide.	C.Squires,C.W.Baxter,J.Campbell,L.F.Lindoy,H.McNab,A.Parkin,S.Parsons,P.A.Tasker,Gang Wei,D.J.White	DALTON TRANS.,2006,,,2026	P21/c	2D	(1,0,0)	G41	cem; Shubnikov plane net (3^3.4^2)
UCUFEE	C17 H22 N2 O2 S1	N-(3-(Benzylamino)propyl)-4-methylbenzenesulfonamide.	C.Squires,C.W.Baxter,J.Campbell,L.F.Lindoy,H.McNab,A.Parkin,S.Parsons,P.A.Tasker,Gang Wei,D.J.White	DALTON TRANS.,2006,,,2026	Pna21	1D	[0,0,1]	B2	2C1
UCUFII	C14 H24 N2 O2 S1	N-(3-(Butylamino)propyl)-4-methylbenzenesulfonamide.	C.Squires,C.W.Baxter,J.Campbell,L.F.Lindoy,H.McNab,A.Parkin,S.Parsons,P.A.Tasker,Gang Wei,D.J.White	DALTON TRANS.,2006,,,2026	P21/c	2D	(1,0,0)	K21	hcb; Shubnikov hexagonal plane net/(6,3)
UDAGUD	C28 H27 N3 O7 S2	N-(1-Ethoxy-2-(((4-nitrophenyl)sulfonyl)amino)-2-phenylethyl)-N-phenylbenzenesulfonamide.	M.Nakanishi,C.Minard,P.Retailleau,K.Cariou,R.H.Dodd	Org.Lett.,2011,13,,5792	P21/c	0D		B01	1M2-1
UDIMAV	C19 H26 Br1 N1 O6 S1	(1S,2S,3R,4R)-4-Acetoxymethyl-1-bromomethyl-2,3-isopropylidenedioxy-1-p-toluenesulfonamido-cyclopentane.	M.Ahmadian,N.K.Khare,J.M.Riordan,A.E.Klon,D.W.Borhani	TETRAHEDRON,2001,57,,9899	P21	1D	[0,1,0]	B2	2C1
UDOVUF	C19 H18 N2 O5 S1	(E)-N-[2-acetyl-1-(4-nitrophenyl)penta-2,4-dien-1-yl]benzenesulfonamide.	J.M.Sorbetti,K.N.Clary,D.A.Rankic,J.E.Wulff,M.Parvez,T.G.Back	J.ORG.CHEM.,2007,72,,3326	P-1	0D		B01	1M2-1
UDOWAM	C24 H21 N1 O3 S1	(E)-N-[1-phenyl-2-(phenylcarbonyl)penta-2,4-dien-1-yl]benzenesulfonamide.	J.M.Sorbetti,K.N.Clary,D.A.Rankic,J.E.Wulff,M.Parvez,T.G.Back	J.ORG.CHEM.,2007,72,,3326	P21/n	0D		B01	1M2-1
UDUNOX	C17 H16 N2 O3 S1	N-(4-Methoxybenzyl)quinoline-8-sulfonamide.	C.R.Andrighetti-Frohner,R.J.Nunes,L.E.da Silva,C.M.O.Simoes,S.Foro	ACTA CRYSTALLOGR.,SECT.E:STRUCT.REP.ONLINE,2007,63,,o3059	P212121	1D	[1,0,0]	B2	2C1
UDUTET	C23 H21 N1 O4 S1	5-(2-Benzoylethenyl)-N-benzyl-2-methoxybenzenesulfonamide.	C.R.Andrighetti-Frohner,A.C.Joussef,C.M.O.Simoes,R.J.Nunes,A.J.Bortoluzzi	ACTA CRYSTALLOGR.,SECT.E:STRUCT.REP.ONLINE,2007,63,,o3275	P-1	1D	[0,0,1]	B2	2C1
UFEQAY	C18 H26 N2 O5 S1	N-(3-(2-Methoxyethyl)-6,6-dimethylbicyclo[3.1.1]hept-2-yl)-4-nitrobenzenesulfonamide.	T.Jennequin,S.Labat,L.Toupet,J.-C.Caille,M.Mauduit	SYNLETT,2008,,,1669	P21	1D	[0,0,1]	B2	2C1
UGOVUH	C18 H20 Cl1 N1 O3 S1	N-(4-Chloro-\a-(tetrahydrofuran-2-yl)benzyl)-4-toluenesulfonamide.	K.Yamada,H.Fujihara,Y.Yamamoto,Y.Miwa,T.Taga,K.Timioka	Org.Lett.,2002,4,,3509	P-1	0D		B01	1M2-1
UKAQUS	C20 H19 N1 O3 S1	N-(5,6-dihydro-4H-3-oxa-benzo(e)azulen-4-yl)-4-methyl-benzenesulfonamide.	A.Padwa,A.Zanka,M.P.Cassidy,J.M.Harris	TETRAHEDRON,2003,59,,4939	P21/c	0D		B01	1M2-1
ULIDOJ	C14 H15 N3 O4 S1	4-(3,4-Diacetyl-5-methyl-1H-pyrazol-1-yl)benzenesulfonamide.	H.A.Abdel-Aziz,A.Bari,S.W.Ng	ACTA CRYSTALLOGR.,SECT.E:STRUCT.REP.ONLINE,2011,67,,o693	Pna21	3D		K4	dia Diamond; 4/6/c1; sqc6
UNOLEO	C19 H24 B1 N1 O4 S1	N-(4-(4,4,5,5-Tetramethyl-1,3,2-dioxaborolan-2-yl)phenyl)-p-toluenesulfonamide.	S.A.Westcott,Xiao-Feng He,C.M.Vogels,A.Decken	ACTA CRYSTALLOGR.,SECT.E:STRUCT.REP.ONLINE,2004,60,,o115	P-1	0D		B01	1M2-1
UNUVUV	C13 H19 N1 O3 S1	N-Cyclohexyl-4-methoxybenzenesulfonamide.	M.H.Khan,I.U.Khan,M.N.Arshad,S.Y.Mughal,M.Akkurt	ACTA CRYSTALLOGR.,SECT.E:STRUCT.REP.ONLINE,2011,67,,o885	Aba2	1D	[0,0,1]	B2	2C1
UNUYUY	C13 H9 Cl1 N2 O5 S1	4-Chloro-N-(4-nitrobenzoyl)benzenesulfonamide.	P.A.Suchetan,S.Foro,B.T.Gowda	ACTA CRYSTALLOGR.,SECT.E:STRUCT.REP.ONLINE,2011,67,,o904	P21	1D	[0,1,0]	B2	2C1
UPABIX	C14 H12 N2 O5 S1	4-Methyl-N-(4-nitrobenzoyl)benzenesulfonamide.	P.A.Suchetan,S.Foro,B.T.Gowda	ACTA CRYSTALLOGR.,SECT.E:STRUCT.REP.ONLINE,2011,67,,o917	P21	1D	[0,1,0]	B2	2C1
UPADEV	C14 H12 N2 O5 S1	2-Methyl-N-(4-nitrobenzoyl)benzenesulfonamide.	P.A.Suchetan,S.Foro,B.T.Gowda	ACTA CRYSTALLOGR.,SECT.E:STRUCT.REP.ONLINE,2011,67,,o929	P21	1D	[0,1,0]	B2	2C1
UPADIZ	C13 H9 Cl1 N2 O5 S1	2-Chloro-N-(4-nitrobenzoyl)benzenesulfonamide.	P.A.Suchetan,S.Foro,B.T.Gowda	ACTA CRYSTALLOGR.,SECT.E:STRUCT.REP.ONLINE,2011,67,,o930	P21	1D	[0,1,0]	B2	2C1
UPAPAD	C12 H9 Cl2 N1 O2 S1	4-Chloro-N-(2-chlorophenyl)benzenesulfonamide.	K.Shakuntala,S.Foro,B.T.Gowda	ACTA CRYSTALLOGR.,SECT.E:STRUCT.REP.ONLINE,2011,67,,o988	C2/c	0D		B01	1M2-1
URAVEP	C20 H26 N2 O4 S2	N,N'-((1S,2S)-Cyclohexane-1,2-diyl)bis(4-methylbenzenesulfonamide).	Yi-Ling Hong,Hua-Jie Tan,Liang Shen	ACTA CRYSTALLOGR.,SECT.E:STRUCT.REP.ONLINE,2011,67,,o1121	P212121	1D	[0,0,1]	K02	2C1
URAVOZ	C14 H16 N2 O4 S1	2-(N-Phenylmethanesulfonamido)ethyl 1H-pyrrole-2-carboxylate.	S.T.Khan,P.Yu,A.Nelofar,Z.Ahmed,S.Chantrapromma	ACTA CRYSTALLOGR.,SECT.E:STRUCT.REP.ONLINE,2011,67,,o1125	P21/c	0D		B01	1M2-1
USIYEB	C13 H12 Cl1 N1 O2 S1	4-Chloro-N-(3-methylphenyl)benzenesulfonamide.	K.Shakuntala,S.Foro,B.T.Gowda	ACTA CRYSTALLOGR.,SECT.E:STRUCT.REP.ONLINE,2011,67,,o1540	C2/c	0D		B01	1M2-1
USOBAG	C13 H14 N2 O2 S1	4-(Benzylamino)benzenesulfonamide.	T.Gelbrich,M.F.Haddow,U.J.Griesser	ACTA CRYSTALLOGR.,SECT.E:STRUCT.REP.ONLINE,2011,67,,o1551	P212121	3D		P22	dia Diamond; 4/6/c1; sqc6
USOCOV	C27 H33 N3 O6 S1	N-cyclohexylcarbamoyl-4-[2-(7-methoxy-4,4-dimethyl-1,3-dioxo-1,2,3,4-tetrahydroisoquinolin-2-yl)ethyl]benzenesulfonamide.	T.Gelbrich,M.F.Haddow,U.J.Griesser	ACTA CRYSTALLOGR.,SECT.E:STRUCT.REP.ONLINE,2011,67,,o1343	P21/c	2D	(1,0,0)	K21	hcb; Shubnikov hexagonal plane net/(6,3)
UTEWIA	C18 H21 N3 O2 S1	N-(1-(Imidazo[1,2-a]pyridin-3-yl)butyl)-4-methylbenzenesulfonamide.	L.Albrecht,A.Albrecht,L.K.Ransborg,K.A.Jorgensen	Chemical Science,2011,2,,1273	P21	1D	[0,1,0]	B2	2C1
UVECII	C14 H17 N5 O3 S1	N,N-Dimethyl-4-(5-(methylamino)-1-oxo-2,3-dihydro-1H-isoindol-4-yl)-1H-imidazole-1-sulfonamide.	M.R.Bhandari,M.Yousufuddin,C.J.Lovely	Org.Lett.,2011,13,,1382	P21/n	0D		B01	1M2-1
UVEDAB	C13 H15 N5 O3 S1	N,N-Dimethyl-4-((1-oxo-2,3-dihydropyrrolo[1,2-a]pyrazin-4(1H)-ylidene)methyl)-1H-imidazole-1-sulfonamide.	M.R.Bhandari,M.Yousufuddin,C.J.Lovely	Org.Lett.,2011,13,,1382	C2/c	0D		B01	1M2-1
UVEMOY	C12 H10 N2 O4 S1	N-(4-Nitrophenyl)benzenesulfonamide.	G.L.Perlovich,A.M.Ryzhakov,V.V.Tkachev,L.Kr.Hansen	CRYST.GROWTH DES.,2011,11,,1067	P21/c	1D	[0,1,0]	B2	2C1
UVEMUE	C12 H11 N3 O4 S1	4-Amino-N-(4-nitrophenyl)benzenesulfonamide.	G.L.Perlovich,A.M.Ryzhakov,V.V.Tkachev,L.Kr.Hansen	CRYST.GROWTH DES.,2011,11,,1067	Pbca	2D	(0,0,1)	K4	sql/Shubnikov tetragonal plane net
UWUZUI	C23 H25 N1 O3 S1	N-(2-(1H-Isochromen-4(3H)-ylidenemethylene)cyclohexyl)-4-methylbenzenesulfonamide.	N.Kern,A.Blanc,J.-M.Weibel,P.Pale	CHEM.COMMUN.,2011,47,,6665	P-1	0D		B01	1M2-1
UXEVEZ	C23 H22 N2 O2 S1	N-(1H-Indol-3-yl(4-methylphenyl)methyl)-4-methylbenzenesulfonamide.	Fangxi Xu,Dan Huang,Chao Han,Wei Shen,Xufeng Lin,Yanguang Wang	J.ORG.CHEM.,2010,75,,8677	P21	2D	(0,0,1)	K4	sql/Shubnikov tetragonal plane net
UXORUV	C15 H23 N1 O2 S1	N-(2-Cyclohexyl-2-phenylethyl)methanesulfonamide.	S.Chuprakov,J.A.Malik,M.Zibinsky,V.V.Fokin	J.AM.CHEM.SOC.,2011,133,,10352	P21212	1D	[1,0,0]	B2	2C1
VABHUD	C13 H12 Cl1 N1 O3 S1	N-(5-Chloro-2-methoxyphenyl)benzenesulfonamide.	Aziz-ur-Rehman,Shahzaman,M.Akkurt,M.A.Abbasi,I.U.Khan	ACTA CRYSTALLOGR.,SECT.E:STRUCT.REP.ONLINE,2010,66,,o2855	P-1	0D		B01	1M2-1
VABPEV	C11 H13 Cl2 N1 O4 S1	2-(2,5-Dichlorobenzenesulfonamido)-3-methylbutanoic acid.	I.U.Khan,P.John,H.Iqbal,S.Sharif,E.R.T.Tiekink	ACTA CRYSTALLOGR.,SECT.E:STRUCT.REP.ONLINE,2010,66,,o2888	P212121	1D	[1,0,0]	K4	SP 1-periodic net (3,6)(1,2)
VACFOW	C14 H15 N1 O3 S1	N-(2-Methoxyphenyl)-4-methylbenzenesulfonamide.	I.U.Khan,T.A.Sheikh,M.N.Arshad	ACTA CRYSTALLOGR.,SECT.E:STRUCT.REP.ONLINE,2010,66,,o2976	Pbca	0D		B01	1M2-1
VACHOX	C18 H18 Cl1 N1 O3 S1	(R)-N-(1-(4-Chlorophenyl)-2-methylene-3-oxobutyl)-4-methylbenzenesulfonamide.	Min Shi,Yong-Mei Xu	Angew.Chem.,Int.Ed.,2002,41,,4507	P21	1D	[0,1,0]	B2	2C1
VANRUZ	C9 H15 N1 O2 S1	N-(1-methyltricyclo[2.2.1.0 2,6]hept-3-yl)methanesulfonamide.	X.Giner,C.Najera,G.Kovacs,A.Lledos,G.Ujaque	ADV.SYNTH.CATAL.,2011,353,,3451	C2/c	1D	[0,0,1]	B2	2C1
VATSIU	C9 H22 N2 O4 S2	N,N'-Pentane-1,5-diyldiethanesulfonamide.	N.Ozbek,S.Alyar,S.Mamas,E.Sahin,N.Karacan	J.MOL.STRUCT.,2012,1010,,1	P21/a	2D	(1,0,-1)	K4	sql/Shubnikov tetragonal plane net
VAWMOV	C7 H12 N4 O6 S1	1\b-D-Ribofuranosyl-1,2,4-triazole-3-sulfonamide.	N.B.Hanna,S.D.Dimitrijevich,S.B.Larson,R.K.Robins,G.R.Revankar	J.HETEROCYCL.CHEM.,1988,25,,1857	P21	3D		O42	pcu alpha-Po primitive cubic; 6/4/c1; sqc1
VETVAR	C10 H17 N3 O3 S1	N-(Dimethylaminoethyl)-(4-methoxy-3-pyridyl)sulfonamide.	L.Dupont,O.Dideberg,J.F.Liegeois,J.Delarge	ACTA CRYSTALLOGR.,SECT.C:CRYST.STRUCT.COMMUN.,1990,46,,1863	P21/n	1D	[1,0,0]	B2	2C1
VETVEV	C12 H19 N3 O2 S1	N-((2-Ethylpyrrolidinyl)methyl)-3-pyridylsulfonamide.	L.Dupont,O.Dideberg,J.F.Liegeois,J.Delarge	ACTA CRYSTALLOGR.,SECT.C:CRYST.STRUCT.COMMUN.,1990,46,,1863	P21/n	1D	[1,0,1]	B2	2C1
VEXVUQ	C13 H18 Cl1 N1 O2 S1	cis-N-(2-chlorocyclohexyl)-4-methylbenzenesulfonamide.	E.A.Jaseer,A.B.Naidu,S.S.Kumar,R.K.Rao,K.G.Thakur,G.Sekar	CHEM.COMMUN.,2007,,,867	P-1	0D		B01	1M2-1
VIDJEY	C16 H24 N2 O3 S1	N-(2-Aminophenyl)-1-((1S,2R)-2-hydroxy-7,7-dimethylbicyclo(2.2.1)hept-1-yl)methanesulfonamide.	J.K.Maurin,A.Krukowski,Z.Czarnocki	ACTA CRYSTALLOGR.,SECT.E:STRUCT.REP.ONLINE,2007,63,,o1593	P212121	2D	(0,0,1)	K4	sql/Shubnikov tetragonal plane net
VIDKID	C7 H8 N2 O4 S1	N-(3-Nitrophenyl)methanesulfonamide.	B.T.Gowda,S.Foro,H.Fuess	ACTA CRYSTALLOGR.,SECT.E:STRUCT.REP.ONLINE,2007,63,,o2337	P-1	0D		B01	1M2-1
VIDKOJ	C8 H11 N1 O2 S1	N-(3-Methylphenyl)methanesulfonamide.	B.T.Gowda,S.Foro,H.Fuess	ACTA CRYSTALLOGR.,SECT.E:STRUCT.REP.ONLINE,2007,63,,o2338	Pccn	1D	[0,0,1]	B2	2C1
VIDKUP	C7 H8 N2 O4 S1	N-(4-Nitrophenyl)methanesulfonamide.	B.T.Gowda,S.Foro,H.Fuess	ACTA CRYSTALLOGR.,SECT.E:STRUCT.REP.ONLINE,2007,63,,o2339	P21/c	0D		B01	1M2-1
VIDLAW	C8 H11 N1 O2 S1	N-(2-Methylphenyl)methanesulfonamide.	B.T.Gowda,S.Foro,H.Fuess	ACTA CRYSTALLOGR.,SECT.E:STRUCT.REP.ONLINE,2007,63,,o2340	P-1	0D		B01	1M2-1
VIRSUL	C34 H26 N4 O4 S2	11,12-bis(p-Toluenesulfonamido)dibenzo[a,c]phenazine.	Tzu-Pin Lin,Chan-Yu Chen,Yuh-Sheng Wen,Shih-Sheng Sun	INORG.CHEM.,2007,46,,9201	P-1	1D	[1,0,0]	T02	2C1
VOHXOG	C8 H9 N1 O4 S1	2-(Benzenesulfonamido)acetic acid.	M.N.Arshad,I.U.Khan,M.Zia-ur-Rehman	ACTA CRYSTALLOGR.,SECT.E:STRUCT.REP.ONLINE,2008,64,,o2283	P21/n	1D	[0,0,1]	K02	2C1
VOQJUH	C13 H10 Cl1 N1 O4 S1	5-Benzenesulfonamido-2-chlorobenzoic acid.	M.N.Arshad,M.N.Tahir,I.U.Khan,M.Shafiq,H.M.A.Sharif	ACTA CRYSTALLOGR.,SECT.E:STRUCT.REP.ONLINE,2009,65,,o831	P21/c	2D	(1,0,0)	K21	hcb; Shubnikov hexagonal plane net/(6,3)
VUKZEH	C27 H24 N2 O7 S1	Dipropargyl1-((5-(dimethylamino)naphthalene-1-sulfonamido)methyl)-7-oxanorborna-2,5-diene-2,3-dicarboxylate.	Vu Hong,A.A.Kislukhin,M.G.Finn	J.AM.CHEM.SOC.,2009,131,,9986	P-1	0D		B01	1M2-1
VURZOY	C20 H24 Br1 N1 O6 S1	rac-N-(2-Bromo-3-oxo-1-(3,4,5-trimethoxyphenyl)butyl)-4-methylbenzenesulfonamide.	Zhan-Guo Chen,Jun-Fa Wei,Ming-Zhen Wang,Li-Yan Zhou,Cong-Jie Zhang,Xian-Ying Shi	ADV.SYNTH.CATAL.,2009,351,,2358	P21/n	0D		B01	1M2-1
VUXPUZ	C8 H8 N2 O3 S1	(1,2-Benzisoxazol-3-yl)-methanesulfonamide.	J.N.Lisgarten,R.A.Palmer	ACTA CRYSTALLOGR.,SECT.C:CRYST.STRUCT.COMMUN.,1988,44,,2013	P21/a	2D	(0,0,1)	K21	hcb; Shubnikov hexagonal plane net/(6,3)
WACHEP	C12 H9 Cl2 N1 O2 S1	N-(2,6-Dichlorophenyl)benzenesulfonamide.	P.G.Nirmala,S.Foro,B.T.Gowda,H.Fuess	ACTA CRYSTALLOGR.,SECT.E:STRUCT.REP.ONLINE,2010,66,,o3061	P21/n	1D	[1,0,0]	B2	2C1
WACHEP01	C12 H9 Cl2 N1 O2 S1	N-(2,6-Dichlorophenyl)benzenesulfonamide.	P.Sanphui,B.Sarma,A.Nangia	CRYST.GROWTH DES.,2010,10,,4550	P21/n	1D	[1,0,0]	B2	2C1
WACHEP02	C12 H9 Cl2 N1 O2 S1	N-(2,6-Dichlorophenyl)benzenesulfonamide.	P.Sanphui,B.Sarma,A.Nangia	CRYST.GROWTH DES.,2010,10,,4550	P21/c	1D	[1,0,0]	B2	2C1
WACJIT	C2 H4 N4 O2 S2	5-Amino-1,3,4-thiadiazole-2-sulfonamide.	J.C.Pedregosa,G.Alzuet,J.Borras,S.Fustero,S.Garcia-Granda,M.R.Diaz	ACTA CRYSTALLOGR.,SECT.C:CRYST.STRUCT.COMMUN.,1993,49,,630	P21/n	3D		O23	sqp; 5/4/t6; sqc13
WACXUV	C14 H13 Cl2 N1 O2 S1	N-(2,4-Dichlorophenyl)-2,4-dimethylbenzenesulfonamide.	P.G.Nirmala,S.Foro,B.T.Gowda,H.Fuess	ACTA CRYSTALLOGR.,SECT.E:STRUCT.REP.ONLINE,2010,66,,o3144	P-1	0D		B01	1M2-1
WACZAC	C22 H24 N2 O2 S1	4-Methyl-N-(2-phenyl-1-(2-pyridinyl)butyl)benzenesulfonamide.	L.Bernardi,V.Cere,C.Femoni,S.Pollicino,A.Ricci	J.ORG.CHEM.,2003,68,,3348	P21/c	1D	[0,1,0]	B2	2C1
WAFKOF	C21 H22 N2 O2 S1	N-[(1S,2S)-2-Amino-1,2-diphenylethyl]-4-methylbenzenesulfonamide.	C.Schlemmer,D.Schollmeyer,N.Blank,A.Stoye,T.Opatz	ACTA CRYSTALLOGR.,SECT.E:STRUCT.REP.ONLINE,2010,66,,o3343	P212121	1D	[1,0,0]	K02	2C1
WAFREC	C15 H17 N1 O2 S1	N-(2,3-Dimethylphenyl)-4-methylbenzenesulfonamide.	P.G.Nirmala,S.Foro,B.T.Gowda,H.Fuess	ACTA CRYSTALLOGR.,SECT.E:STRUCT.REP.ONLINE,2010,66,,o3349	P21/c	1D	[0,0,1]	B2	2C1
WALWOW	C21 H25 N3 O4 S1	(+-)-2-((1SR)-1-Hydroxy-2-phenylethyl)-5-((SR)-methoxy(phenyl)methyl)-N,N-dimethyl-1H-imidazole-1-sulfonamide.	S.Sahli,B.Stump,T.Welti,W.B.Schweizer,F.Diederich,D.Blum-Kaelin,J.D.Aebi,H.-J.Bohm	HELV.CHIM.ACTA,2005,88,,707	P21/c	0D		B01	1M2-1
WAWMUD	C12 H13 N3 O2 S1	4-(2-Methylanilino)pyridine-3-sulfonamide.	N.K.Hulita,A.Danilovski,D.Filic,M.Marinkovic,E.Mestrovic,M.Dumic	ACTA CRYSTALLOGR.,SECT.C:CRYST.STRUCT.COMMUN.,2005,61,,o648	P21/n	2D	(0,0,1)	K4	sql/Shubnikov tetragonal plane net
WAWNAK	C12 H13 N3 O2 S1	4-(4-Methylanilino)pyridine-3-sulfonamide.	N.K.Hulita,A.Danilovski,D.Filic,M.Marinkovic,E.Mestrovic,M.Dumic	ACTA CRYSTALLOGR.,SECT.C:CRYST.STRUCT.COMMUN.,2005,61,,o648	P21/c	2D	(1,0,0)	K21	hcb; Shubnikov hexagonal plane net/(6,3)
WEBBIO	C28 H24 N2 O4 S2	N,N'-(1,2-Ethynylenedi-2,2'-phenylene)-bis(4-methylbenzenesulfonamide).	D.S.Davis,J.L.Stubbs,F.R.Fronczek,R.D.Gandour	ACTA CRYSTALLOGR.,SECT.C:CRYST.STRUCT.COMMUN.,1993,49,,2148	P-1	1D	[1,0,0]	K02	2C1
WEBWUV	C6 H6 F1 N1 O2 S1	p-Fluorobenzenesulfonamide.	P.G.Jones,A.Weinkauf	Z.KRISTALLOGR.,1993,208,,128	Pbca	2D	(0,0,1)	K4	sql/Shubnikov tetragonal plane net
WENROX	C13 H14 N4 O3 S1	4-Acetamido-N-(4-methyl-2-pyrimidinyl)benzenesulfonamide.	Yuchuan Gong,Enxian Lu,Yuegang Zhang,V.G.Young Junior,D.J.W.Grant	ACTA CRYSTALLOGR.,SECT.E:STRUCT.REP.ONLINE,2006,62,,o4245	C2/c	2D	(1,0,-2)	K21	hcb; Shubnikov hexagonal plane net/(6,3)
WIGXIU	C7 H9 N3 O3 S1	2-(Hydrazinocarbonyl)benzenesulfonamide.	Shu-Yan Wang,Wan-Cheng Guo,Ning Ma	ACTA CRYSTALLOGR.,SECT.E:STRUCT.REP.ONLINE,2007,63,,o3192	C2/c	3D		O42	nce-6-C2/c
WIHGAW	C10 H15 N1 O2 S1	N-(2,4,6-Trimethylphenyl)methanesulfonamide.	B.T.Gowda,S.Foro,H.Fuess	ACTA CRYSTALLOGR.,SECT.E:STRUCT.REP.ONLINE,2007,63,,o3084	P21/n	1D	[0,1,0]	B2	2C1
WIHGEA	C9 H13 N1 O2 S1	N-(3,4-Dimethylphenyl)methanesulfonamide.	B.T.Gowda,S.Foro,H.Fuess	ACTA CRYSTALLOGR.,SECT.E:STRUCT.REP.ONLINE,2007,63,,o3085	P21	1D	[0,1,0]	B2	2C1
WIHGOK	C7 H7 Cl2 N1 O2 S1	N-(2,4-Dichlorophenyl)methanesulfonamide.	B.T.Gowda,S.Foro,H.Fuess	ACTA CRYSTALLOGR.,SECT.E:STRUCT.REP.ONLINE,2007,63,,o3087	P-1	0D		B01	1M2-1
WIKNAF	C14 H11 Cl1 N4 O2 S1	N-(5-Chloro-2-quinoxalinyl)benzenesulfonamide.	Mei Liu,J.R.Ruble,S.K.Arora	ACTA CRYSTALLOGR.,SECT.C:CRYST.STRUCT.COMMUN.,1994,50,,2032	P-1	1D	[0,1,0]	K21	SP 1-periodic net (4,4)(0,2)
WIKROY	C14 H29 N1 O4 S1 Si1	N-(2-t-butyl-5-methyl-4H-1,3-dioxin-4-yl)-2-(trimethylsilyl)ethanesulfonamide.	E.Tatarov,C.Bruhn,H.Frauenrath	Z.KRISTALLOGR.-NEW CRYST.STRUCT.,2007,222,,139	Pbca	1D	[0,0,1]	B2	2C1
WINWUL02	C13 H12 N2 O5 S1	N-(4-Nitro-2-phenoxyphenyl)methanesulfonamide.	P.Sanphui,B.Sarma,A.Nangia	J.Pharm.Sci.,2011,100,,2287	C2/c	1D	[0,0,1]	B2	2C1
WOBHUR	C6 H8 N2 O2 S1	4-Aminobenzenesulfonamide.	T.Gelbrich,A.L.Bingham,T.L.Threlfall,M.B.Hursthouse	ACTA CRYSTALLOGR.,SECT.C:CRYST.STRUCT.COMMUN.,2008,64,,o205	Pbca	2D	(0,0,1)	T21	hcb; Shubnikov hexagonal plane net/(6,3)
WOJRIW	C14 H14 N2 O4 S1	(S)-N-(\a-Methylbenzyl)-4-nitrobenzenesulfonamide.	M.S.Hendi,R.E.Davis,K.A.Wheeler	CRYSTAL ENGINEERING,2000,3,,209	P21	1D	[0,1,0]	B2	2C1
WOJROC	C14 H14 Cl1 N1 O2 S1	(R)-N-(\a-Methylbenzyl)-4-chlorobenzenesulfonamide.	M.S.Hendi,R.E.Davis,K.A.Wheeler	CRYSTAL ENGINEERING,2000,3,,209	P21	1D	[0,1,0]	B2	2C1
WOJSAP	C15 H17 N1 O3 S1	(R)-N-(\a-Methylbenzyl)-4-methoxybenzenesulfonamide.	M.S.Hendi,R.E.Davis,K.A.Wheeler	CRYSTAL ENGINEERING,2000,3,,209	P21	1D	[0,1,0]	B2	2C1
WOQFUE	C12 H17 N1 O2 S1	N-Cyclohexylbenzenesulfonamide.	H.A.Barnes,J.C.Barnes,T.J.R.Weakley	PRIVATE COMMUNICATION,2008,,,	Pbca	1D	[1,0,0]	B2	2C1
WUGBIK	C34 H27 F1 N1 O3 P1 S1	N-((Di-1-naphthylphosphoryl)(4-fluorophenyl)methyl)-4-methylbenzenesulfonamide.	Xiao Fu,Wei-Tian Loh,Yan Zhang,Tao Chen,Ting Ma,Hongjun Liu,Jianmin Wang,Choon-Hong Tan	Angew.Chem.,Int.Ed.,2009,48,,7387	P-1	0D		B01	1M2-1
WUPHOF	C19 H20 Br1 Cl1 N2 O3 S1	N-(4-Bromobenzyl)-4-chloro-N-(2-oxoazepan-3-yl)benzenesulfonamide.	M.N.Mattson,M.L.Neitzel,D.A.Quincy,C.M.Semko,A.W.Garofalo,P.S.Keim,A.W.Konradi,M.A.Pleiss,H.L.Sham,E.F.Brigham,E.G.Goldbach,Hongbin Zhang,J.-M.Sauer,G.S.Basi	BIOORG.MED.CHEM.LETT.,2010,20,,2148	P21	1D	[0,1,0]	B2	2C1
WURBER	C20 H18 N2 O2 S1	5-(Dimethylamino)-N-(4-ethynylphenyl)naphthalene-1-sulfonamide.	C.-H.Chui,Q.Wang,W.-C.Chow,M.C.-W.Yuen,K.-L.Wong,W.-M.Kwok,G.Y.-M.Cheng,R.S.-M.Wong,S.-W.Tong,K.-W.Chan,F.-Y.Lau,P.B.-S.Lai,K.-H.Lam,E.Fabbri,X.-M.Tao,R.Gambari,W.-Y.Wong	CHEM.COMMUN.,2010,46,,3538	Cc	1D	[1,0,1]	B2	2C1
WUTBAP	C13 H19 N1 O6 S1	4-Methyl-N-(2,3,5,6-tetrahydroxycyclohexyl)benzenesulfonamide.	N.I.Kurbanoglu,M.Celik,H.Kilic,C.Alp,E.Sahin,M.Balci	TETRAHEDRON,2010,66,,3485	P-1	2D	(0,0,1)	O23	cem; Shubnikov plane net (3^3.4^2)
WUYQAJ	C10 H9 N3 O2 S1	N-(Pyridin-2-yl)pyridine-3-sulfonamide.	K.Katagiri,T.Ikeda,M.Tominaga,H.Masu,I.Azumaya	CRYST.GROWTH DES.,2010,10,,2291	P-1	0D		B01	1M2-1
XAJRUW	C15 H16 N2 O3 S1	N-(2-((1E)-N-Hydroxyethanimidoyl)phenyl)-4-methylbenzenesulfonamide.	S.Parsons,D.White,P.Tasker,S.Harris,P.A.Wood	PRIVATE COMMUNICATION,2004,,,	P21/n	0D		B01	1M2-1
XAPDEZ	C10 H10 N2 O6 S1	2-Nitro-N-(2-oxotetrahydrofuran-3-yl)benzenesulfonamide.	S.P.Singh,A.Michaelides,A.R.Merrill,A.L.Schwan	J.ORG.CHEM.,2011,76,,6825	P212121	1D	[1,0,0]	B2	2C1
XARQIS	C10 H13 N5 O2 S1	4-Methyl-N-(2-(1H-tetrazol-1-yl)ethyl)benzenesulfonamide.	K.Mereiter,M.Tafili-Kryeziu,F.Werner	PRIVATE COMMUNICATION,2011,,,	P21/c	0D		B01	1M2-1
XATFAA	C15 H18 N6 O4 S2	N-(6-(imidazo(1,2-d)(1,2,4)thiadiazol-3-yl(methyl)amino)hexyl)-2-nitrobenzenesulfonamide.	R.Leung-Toung,T.F.Tam,Yanqing Zhao,C.D.Simpson,Wanren Li,D.Desilets,K.Karimian	J.ORG.CHEM.,2005,70,,6230	Pbca	1D	[0,1,0]	B2	2C1
XAVKUB	C12 H13 N3 O2 S1	4-(3-Methylanilino)pyridine-3-sulfonamide.	Gu-Ping Tang,Jian-Ming Gu	ACTA CRYSTALLOGR.,SECT.E:STRUCT.REP.ONLINE,2005,61,,o3140	P-1	2D	(0,0,1)	G22	sql/Shubnikov tetragonal plane net
XAVKUB01	C12 H13 N3 O2 S1	4-(3-Methylanilino)pyridine-3-sulfonamide.	N.K.Hulita,A.Danilovski,D.Filic,M.Marinkovic,E.Mestrovic,M.Dumic	ACTA CRYSTALLOGR.,SECT.C:CRYST.STRUCT.COMMUN.,2005,61,,o648	P-1	2D	(0,0,1)	G22	sql/Shubnikov tetragonal plane net
XAXTOH	C21 H25 N1 O3 S1	4-Methyl-N-((2,2,5-trimethyl-4-phenyl-2,3-dihydrofuran-3-yl)methyl)benzenesulfonamide.	Di-Han Zhang,Yin Wei,Min Shi	Chem.-Eur.J.,2012,18,,7026	P21/c	0D		B01	1M2-1
XAYLIT	C32 H25 N3 O4 S1	N-(4-(9,10-Dioxoanthracen-1-ylamino)phenyl)-5-(dimethylamino)naphthalenesulfonamide.	R.A.Illos,I.Ergaz,S.Bittner	Z.KRISTALLOGR.-NEW CRYST.STRUCT.,2005,220,,285	P21/c	1D	[0,1,0]	B2	2C1
XAYPIY	C17 H15 N3 O6 S1	3-(1H-Indol-3-yl)-2-(2-nitrobenzenesulfonamido)propanoic acid unknown solvate.	I.U.Khan,H.Mubashar-ur-Rehman,S.Aziz,W.T.A.Harrison	ACTA CRYSTALLOGR.,SECT.E:STRUCT.REP.ONLINE,2012,68,,o2019	P41212	0D		B01	1M2-1
XAYWUR	C20 H28 N2 O6 S2	N,N'-([Ethane-1,2-diylbis(oxy)]bis(ethane-2,1-diyl))bis(4-methylbenzenesulfonamide).	N.N.Al-Mohammed,Y.Alias,Z.Abdullah,H.Khaledi	ACTA CRYSTALLOGR.,SECT.E:STRUCT.REP.ONLINE,2012,68,,o1983	C2/c	1D	[1,0,0]	K02	2C1
XAZGOW	C14 H20 N2 O2 S1	N-(3-Aminobicyclo[2.2.1]heptan-2-yl)-4-methylbenzenesulfonamide.	A.A.-M.Abdel-Aziz,A.S.El-Azab,M.A.El-Sherbeny,S.W.Ng,E.R.T.Tiekink	ACTA CRYSTALLOGR.,SECT.E:STRUCT.REP.ONLINE,2012,68,,o2032	P21	1D	[0,1,0]	K02	2C1
XAZYAA	C17 H15 N3 O5 S1	4-([(E)-2,3-Dihydroxybenzylidene]amino)-N-(5-methyl-1,2-oxazol-3-yl)benzenesulfonamide.	M.N.Tahir,A.H.Khan,M.S.Iqbal,C.Munir,T.Aziz	ACTA CRYSTALLOGR.,SECT.E:STRUCT.REP.ONLINE,2012,68,,o2125	P-1	1D	[1,0,1]	K02	2C1
XEGMIF	C20 H19 N1 O2 S2	4-Methyl-N-(2-(p-tolylsulfanyl)phenyl)benzenesulfonamide.	S.Banerjee,A.K.Mukherjee,B.Nandi,N.G.Kundu,M.Helliwell	ACTA CRYSTALLOGR.,SECT.C:CRYST.STRUCT.COMMUN.,2000,56,,1490	P-1	0D		B01	1M2-1
XEWKUF	C17 H15 F1 N2 O4 S2	N-(2,3-Dihydro-4-(2,5-dimethoxyphenyl)thiazol-2-ylidene)-4-fluorobenzensulfonamide.	P.Beuchet,M.Varache-Lembege,A.Neveu,J.-M.Leger,J.Vercauteren,S.Larrouture,G.Deffieux,A.Nuhrich	EUR.J.MED.CHEM.,1999,34,,773	P-1	0D		B01	1M2-1
XEWYAA	C31 H33 N3 O13 S1	N-(2-((4-(3,4,5,6-tetrakis(acetoxy)-3,4,5,6-tetrahydro-2H-pyran-2-yloxy)phenyl)amino)pyridin-3-yl)-4-methoxybenzenesulfonamide.	K.M.Engstrom,R.F.Henry,I.Marsden	TETRAHEDRON LETT.,2007,48,,1359	P21	1D	[0,1,0]	T02	2C1
XIFJUS	C9 H9 N3 O2 S2	N-(5-Methyl-3H-(1,3,4)thiadiazol-2-ylidene)benzenesulfonamide.	T.A.Mayer,M.B.Hursthouse,T.L.Threlfall,S.J.Coles	University of Southampton, Crystal Structure Report Archive,2000,,,	P-1	0D		B01	1M2-1
XIFKAZ	C10 H9 N3 O2 S1	N-(pyrimidin-2-yl)benzenesulfonamide.	T.A.Mayer,M.B.Hursthouse,T.L.Threlfall,S.J.Coles	University of Southampton, Crystal Structure Report Archive,2000,,,	P21/c	0D		B01	1M2-1
XIFKED	C11 H11 N3 O2 S1	4-methyl-N-(pyrimidin-2-yl)benzenesulfonamide.	T.A.Mayer,M.B.Hursthouse,T.L.Threlfall,S.J.Coles	University of Southampton, Crystal Structure Report Archive,2000,,,	P-1	0D		B01	1M2-1
XIFKIH	C12 H13 N3 O2 S1	4-Amino-N-(3-methyl-1H-pyridin-2-ylidene)benzenesulfonamide.	T.A.Mayer,M.B.Hursthouse,T.L.Threlfall,S.J.Coles	University of Southampton, Crystal Structure Report Archive,2000,,,	C2/c	3D		G41	bnn hexagonal BN; 5/4/h5; sqc12
XIFKON	C12 H13 N3 O2 S1	4-Amino-N-(4-methyl-1H-pyridin-2-ylidene)benzenesulfonamide.	T.A.Mayer,M.B.Hursthouse,T.L.Threlfall,S.J.Coles	University of Southampton, Crystal Structure Report Archive,2000,,,	C2/c	2D	(1,0,0)	K21	hcb; Shubnikov hexagonal plane net/(6,3)
XIFLOO	C10 H9 N3 O2 S1	N-(pyrazin-2-yl)benzenesulfonamide.	M.B.Hursthouse,T.L.Threlfall,S.J.Coles,S.C.Ward	University of Southampton, Crystal Structure Report Archive,1999,,,	P-1	1D	[1,0,0]	B2	2C1
XIFMEF	C13 H12 Cl1 N3 O3 S1	2-(p-acetoamidobenzenesulfonamido)-5-chloropyridine.	M.B.Hursthouse,T.L.Threlfall,S.J.Coles,S.C.Ward	University of Southampton, Crystal Structure Report Archive,1999,,,	P-1	1D	[1,0,0]	P03	SP 1-periodic net (4,4)(0,2)
XIFMIJ	C12 H12 N2 O2 S1	N-(5-Methyl-pyridin-2(1H)-ylidene)benzenesulfonamide.	M.B.Hursthouse,T.L.Threlfall,S.J.Coles,S.C.Ward	University of Southampton, Crystal Structure Report Archive,1999,,,	P21/c	0D		B01	1M2-1
XIFMUV	C12 H12 N2 O2 S1	N-(3-Methyl-1H-pyridin-2-ylidene)benzenesulfonamide.	T.A.Mayer,M.B.Hursthouse,T.L.Threlfall,S.J.Coles	University of Southampton, Crystal Structure Report Archive,2000,,,	C2/c	0D		B01	1M2-1
XIFNOQ	C12 H12 N2 O2 S1	N-(4-Methyl-1H-pyridin-2-ylidene)benzenesulfonamide.	T.A.Mayer,M.B.Hursthouse,T.L.Threlfall,S.J.Coles	University of Southampton, Crystal Structure Report Archive,2000,,,	Pbca	0D		B01	1M2-1
XIFNUW	C10 H11 N3 O2 S2	4-methyl-N-(5-methyl-1,3,4-thiadiazol-2(3H)-ylidene)benzenesulfonamide.	T.A.Mayer,M.B.Hursthouse,T.L.Threlfall,S.J.Coles	University of Southampton, Crystal Structure Report Archive,2000,,,	P-1	0D		B01	1M2-1
XIFTUC	C10 H11 N5 O3 S1	4-Acetamido-N-(5-amino-1,2,4-triazol-1-yl)benzenesulfonamide.	Fu Juan,Zhu Chuan-Fang,Sun Yu-Ting,Hu Bo	ACTA CRYSTALLOGR.,SECT.E:STRUCT.REP.ONLINE,2007,63,,o3116	P21/c	3D		G22	dia Diamond; 4/6/c1; sqc6
XIQFAE	C16 H19 N1 O3 S1	N-(1-(furan-2-yl)-2-methylbut-3-enyl)-4-methylbenzenesulfonamide.	Wenshuo Lu,Tak Hang Chan	J.ORG.CHEM.,2001,66,,3467	P21/c	0D		B01	1M2-1
XOBVUG	C18 H18 N2 O4 S1	(S)-Methyl 2-(benzenesulfonamido)-3-(1H-indol-3-yl)propanoate.	Wen-Ming Li,Jian-Guo Wang,Wan-Cheng Guo,Zheng-Ming Li,Hai-Bin Song	Jiegou Huaxue(Chin.J.Struct.Chem.),2008,27,,691	P212121	2D	(0,0,1)	K4	sql/Shubnikov tetragonal plane net
XOBWAN	C18 H17 Cl1 N2 O4 S1	(S)-Methyl 2-(4-chlorobenzenesulfonamido)-3-(1H-indol-3-yl)propanoate.	Wen-Ming Li,Jian-Guo Wang,Wan-Cheng Guo,Zheng-Ming Li,Hai-Bin Song	Jiegou Huaxue(Chin.J.Struct.Chem.),2008,27,,691	P212121	1D	[0,1,0]	B2	2C1
XOBYUJ	C27 H32 N2 O4 S1	4-methyl-N-((3-methylphenyl)(8,9,9-trimethyl-2-oxo-3,5,6,7,8,8a-hexahydro-2H-5,8-methano-1,4-benzoxazin-3-yl)methyl)benzenesulfonamide.	Huan-Huan Zhang,Xiu-Qin Hu,Xiao Wang,Yong-Chun Luo,Peng-Fei Xu	J.ORG.CHEM.,2008,73,,3634	P21	1D	[1,0,0]	B2	2C1
XOPVAZ	C19 H23 N1 O2 S2	N-(2-phenylthiocyclohexyl)-4-methylbenzenesulfonamide.	Xue-Long Hou,Ren-Hua Fan,Li-Xin Dai	J.ORG.CHEM.,2002,67,,5295	P-1	0D		B01	1M2-1
XOXSIM	C24 H29 N1 O2 S2 Si1	N-(2-(Phenylthio)-1-phenyl-2-(trimethylsilyl)ethyl)-p-toluenesulfonamide.	V.K.Aggarwal,E.Alonso,M.Ferrara,S.E.Spey	J.ORG.CHEM.,2002,67,,2335	P-1	0D		B01	1M2-1
XOXYAK	C22 H20 N2 O4 S1	2,2-Dimethyl-6-(phenylsulfonamido-S)-4-(2-pyridone)-chromene.	E.Salamon,R.Mannhold,H.Weber,H.Lemoine,W.Frank	J.Med.Chem.,2002,45,,1086	P21/n	1D	[0,1,0]	B2	2C1
XUBSOD	C9 H11 N1 O4 S1	Methyl 2-(benzenesulfonamido)acetate.	M.N.Arshad,I.U.Khan,M.Zia-ur-Rehman,M.Shafiq	ACTA CRYSTALLOGR.,SECT.E:STRUCT.REP.ONLINE,2009,65,,o1204	P21	1D	[0,1,0]	B2	2C1
XUDTEV	C6 H6 N2 O4 S1	3-Nitrobenzenesulfonamide.	M.Tremayne,C.C.Seaton,C.Glidewell	ACTA CRYSTALLOGR.,SECT.B:STRUCT.SCI.,2002,58,,823	P21	1D	[0,1,0]	K02	2C1
XUDTIZ	C6 H6 N2 O4 S1	4-Nitrobenzenesulfonamide.	M.Tremayne,C.C.Seaton,C.Glidewell	ACTA CRYSTALLOGR.,SECT.B:STRUCT.SCI.,2002,58,,823	P21/n	2D	(0,1,0)	K4	sql/Shubnikov tetragonal plane net
XUDTIZ01	C6 H6 N2 O4 S1	4-Nitrobenzenesulfonamide.	Tianyan Zhou,Qiang Zhang,Guoshu Chen,Zhongyuan Zhou	ACTA CRYSTALLOGR.,SECT.E:STRUCT.REP.ONLINE,2004,60,,o1767	P21/n	2D	(1,0,-1)	K4	sql/Shubnikov tetragonal plane net
XUGNUJ	C19 H23 Br1 N2 O2 S1	4-Bromo-N-((1S,2R)-1-phenyl-2-(pyrrolidin-1-yl)propyl)benzenesulfonamide.	Jian-Hua Xie,Sheng Liu,Wei-Ling Kong,Wen-Ju Bai,Xiao-Chen Wang,Li-Xin Wang,Qi-Lin Zhou	J.AM.CHEM.SOC.,2009,131,,4222	P21	1D	[0,1,0]	B2	2C1
XUGTEZ	C24 H31 N1 O2 S1	4-Methyl-N-((2S,4aS,10aR)-1,1,4a-trimethyl-1,2,3,4,4a,9,10,10a-octahydrophenanthren-2-yl)benzenesulfonamide.	Yu-Jun Zhao,L.-J.S.Tan,Bin Li,Si-Min Li,Teck-Peng Loh	CHEM.COMMUN.,2009,,,3738	P-1	0D		B01	1M2-1
XUQNON	C23 H21 N1 O2 S1	4-Methyl-N-(2-(2-methyl-1H-inden-3-yl)phenyl)benzenesulfonamide.	P.Kothandaraman,Shi Jia Foo,P.W.H.Chan	J.ORG.CHEM.,2009,74,,5947	P21/n	0D		B01	1M2-1
XURCAP	C30 H31 N3 O4 S1	5-(Dimethylamino)-N-(6-(1,3-dioxo-1H-benzo[de]isoquinolin-2(3H)-yl)hexyl)naphthalene-1-sulfonamide.	V.S.Jisha,A.J.Thomas,D.Ramaiah	J.ORG.CHEM.,2009,74,,6667	P21/c	1D	[1,0,0]	B2	2C1
XUXJOQ	C28 H34 N4 O5 S1	(2S,3R)-4-(4-(4-Nitrobenzyl)piperazin-1-yl)-3-hydroxy-1-phenyl-2-(4-toluenesulfonamido)butane.	W.Cunico,C.R.B.Gomes,W.T.A.Harrison,M.Moreth,J.L.Wardell,S.M.S.V.Wardell	Z.KRISTALLOGR.,2009,224,,461	P212121	1D	[1,0,0]	K4	SP 1-periodic net (3,6)(1,2)
YABGUD	C19 H25 N5 O4 S2	N-Methyl-N-(2-(methyl(1-methyl-1H-benzimidazol-2-yl)amino)ethyl)-4-((methylsulfonyl)amino)-benzenesulfonamide.	J.W.Ellingboe,W.Spinelli,M.W.Winkley,T.T.Nguyen,R.W.Parsons,I.F.Moubarak,J.M.Kitzen,D.Von Engen,J.F.Bagli	J.Med.Chem.,1992,35,,705	P21/c	1D	[0,1,0]	B2	2C1
YAFTEG	C14 H13 Cl2 N1 O2 S1	2,4-Dichloro-N-(2,4-dimethylphenyl)benzenesulfonamide.	V.Z.Rodrigues,S.Foro,B.T.Gowda	ACTA CRYSTALLOGR.,SECT.E:STRUCT.REP.ONLINE,2011,67,,o2824	P21/n	0D		B01	1M2-1
YAFVEI	C16 H13 N1 O2 S1	N-(1-Naphthyl)benzenesulfonamide.	Sifang Zhang,Yuewen Zhang,Chuntao Wang,Ruitao Zhu	ACTA CRYSTALLOGR.,SECT.E:STRUCT.REP.ONLINE,2011,67,,o2831	P212121	1D	[1,0,0]	B2	2C1
YAFXAG	C14 H13 Cl2 N1 O2 S1	2,4-Dichloro-N-(3,5-dimethylphenyl)benzenesulfonamide.	V.Z.Rodrigues,S.Foro,B.T.Gowda	ACTA CRYSTALLOGR.,SECT.E:STRUCT.REP.ONLINE,2011,67,,o2842	C2/c	0D		B01	1M2-1
YAGGEU	C15 H16 Cl1 N1 O2 S1	4-Chloro-N-(2,6-dimethylphenyl)-2-methylbenzenesulfonamide.	V.Z.Rodrigues,S.Foro,B.T.Gowda	ACTA CRYSTALLOGR.,SECT.E:STRUCT.REP.ONLINE,2011,67,,o2890	P-1	0D		B01	1M2-1
YAGMAV	C11 H13 N3 O2 S1	N-Phenyl-3,5-dimethyl-4-pyrazolesulfonamide.	S.Parsons,M.Yaseen,K.Shaw,R.Ramage,P.A.Wood	PRIVATE COMMUNICATION,2004,,,	P21/c	1D	[0,1,0]	K4	SP 1-periodic net (3,6)(1,2)
YAGPEC	C11 H12 N2 O3 S1	N-Phenyl-3,5-dimethyl-4-isoxazolesulfonamide.	S.Parsons,M.Yaseen,R.Ramage,P.A.Wood	PRIVATE COMMUNICATION,2004,,,	P21/c	1D	[0,1,0]	B2	2C1
YAGPED	C15 H16 Cl1 N1 O2 S1	4-Chloro-N-(3,4-dimethylphenyl)-2-methylbenzenesulfonamide.	V.Z.Rodrigues,S.Foro,B.T.Gowda	ACTA CRYSTALLOGR.,SECT.E:STRUCT.REP.ONLINE,2011,67,,o2930	P-1	0D		B01	1M2-1
YAGYIQ	C38 H38 Br2 N4 O4 S2	(E)-N,N'-bis[2-(5-bromo-1H-indol-3-yl)ethyl]-N,N'-(but-2-ene-1,4-diyl)bis(4-methylbenzenesulfonamide).	Yongbing Lou	ACTA CRYSTALLOGR.,SECT.E:STRUCT.REP.ONLINE,2011,67,,o2987	P-1	1D	[1,-1,0]	K02	2C1
YAHJAU	C20 H20 N2 O4 S2	N,N'-(1,3-Phenylenebis(methylene))dibenzenesulfonamide.	Ejaz,I.U.Khan,H.Ahmad,W.T.A.Harrison	ACTA CRYSTALLOGR.,SECT.E:STRUCT.REP.ONLINE,2011,67,,o3037	C2/c	2D	(0,0,1)	K4	sql/Shubnikov tetragonal plane net
YAWBIJ	C22 H24 N2 O4 S2	N,N'-(1,3-Phenylenebis(methylene))bis(4-methylbenzenesulfonamide).	Ejaz,I.U.Khan,W.T.A.Harrison,R.Anjum	ACTA CRYSTALLOGR.,SECT.E:STRUCT.REP.ONLINE,2012,68,,o950	P-1	2D	(0,0,1)	K4	sql/Shubnikov tetragonal plane net
YAWTUN	C13 H16 N2 O2 S1	4a-Methyl-2,3,4,4a-tetrahydro-1H-carbazole-6-sulfonamide.	A.O.Al-Youbi,A.M.Asiri,H.M.Faidallah,S.W.Ng,E.R.T.Tiekink	ACTA CRYSTALLOGR.,SECT.E:STRUCT.REP.ONLINE,2012,68,,o1050	P21/n	2D	(1,0,-1)	K21	hcb; Shubnikov hexagonal plane net/(6,3)
YAXKAL	C19 H19 N3 O4 S2	N-(2-Aminopyridin-3-yl)-4-methyl-N-((4-methylphenyl)sulfonyl)benzenesulfonamide.	A.Taher,V.J.Smith	ACTA CRYSTALLOGR.,SECT.E:STRUCT.REP.ONLINE,2012,68,,o1136	P-1	0D		B01	1M2-1
YAXKIT	C28 H33 F1 N2 O5 S1	(2S,3R)-t-ButylN-[4-(N-benzyl-4-fluorobenzenesulfonamido)-3-hydroxy-1-phenylbutan-2-yl]carbamate.	M.Moreth,M.V.N.de Souza,J.L.Wardell,S.M.S.V.Wardell,E.R.T.Tiekink	ACTA CRYSTALLOGR.,SECT.E:STRUCT.REP.ONLINE,2012,68,,o1138	P21	1D	[1,0,0]	K02	2C1
YAXVOK	C11 H15 N3 O2 S1	4-(2-((E)-Cyclopentylidene)hydrazin-1-yl)benzenesulfonamide.	A.O.Al-Youbi,A.M.Asiri,H.M.Faidallah,S.W.Ng,E.R.T.Tiekink	ACTA CRYSTALLOGR.,SECT.E:STRUCT.REP.ONLINE,2012,68,,o1196	P21/c	2D	(1,0,0)	G41	cem; Shubnikov plane net (3^3.4^2)
YAZMOC	C23 H35 N3 O4 S1	N-(3,3-bis((S)-4-Isopropyl-4,5-dihydro-oxazol-2-yl)butyl)-4-methylbenzenesulfonamide.	M.Seitz,C.Capacchione,S.Bellemin-Laponnaz,H.Wadepohl,B.D.Ward,L.H.Gade	DALTON TRANS.,2006,,,193	P21	1D	[1,0,0]	B2	2C1
YIFZAP	C6 H7 N1 O2 S1	Benzenesulfonamide.	B.T.Gowda,R.Nayak,J.Kozisek,M.Tokarcik,H.Fuess	ACTA CRYSTALLOGR.,SECT.E:STRUCT.REP.ONLINE,2007,63,,o2967	Pc	2D	(1,0,0)	K4	sql/Shubnikov tetragonal plane net
YIFZET	C8 H11 N1 O2 S1	3,4-Dimethylbenzenesulfonamide.	B.T.Gowda,R.Nayak,S.Foro,J.Kozisek,H.Fuess	ACTA CRYSTALLOGR.,SECT.E:STRUCT.REP.ONLINE,2007,63,,o2968	P21/c	2D	(1,0,0)	K4	sql/Shubnikov tetragonal plane net
YIRCAE	C18 H19 N3 O3 S1	N-(1,5-Dimethyl-3-oxo-2-phenyl-2,3-dihydro-1H-pyrazol-4-yl)-4-methylbenzenesulfonamide.	L.E.da Silva,P.T.de Sousa Junior,E.L.Dall'Oglio,S.Foro	ACTA CRYSTALLOGR.,SECT.E:STRUCT.REP.ONLINE,2008,64,,o52	P-1	0D		B01	1M2-1
YIRWAY	C15 H14 N2 O3 S2	4-Methoxy-N-(6-methyl-2,3-dihydro-1,3-benzothiazol-2-ylidene)benzenesulfonamide.	G.Navarrete-Vazquez,H.Moreno-Diaz,R.Villalobos-Molina,S.Estrada-Soto,H.Tlahuext	ACTA CRYSTALLOGR.,SECT.E:STRUCT.REP.ONLINE,2008,64,,o227	P21/c	0D		B01	1M2-1
YIXLEX	C19 H17 Cl1 N4 O3 S1	4-(5-Chloro-2-hydroxybenzylideneamino)-N-(4,6-dimethylpyrimidin-2-yl)benzenesulfonamide.	Z.H.Chohan,M.N.Tahir,H.A.Shad,I.U.Khan	ACTA CRYSTALLOGR.,SECT.E:STRUCT.REP.ONLINE,2008,64,,o648	Pbca	1D	[1,0,0]	B2	2C1
YODFIH	C18 H26 N2 O6 S2	N,N'-Diisopropyl-3,6-dimethoxynaphthalene-2,7-disulfonamide.	Zu-Wei Song,Zhi-Qiang Hu	ACTA CRYSTALLOGR.,SECT.E:STRUCT.REP.ONLINE,2008,64,,o1499	P21/c	2D	(1,0,2)	K21	hcb; Shubnikov hexagonal plane net/(6,3)
YOTVAF	C12 H16 Cl1 N1 O4 S2	(2S)-Methyl 2-(4-chlorobenzenesulfonamido)-4-(methylsulfanyl)butanoate.	T.Syed,S.Hameed,P.G.Jones	ACTA CRYSTALLOGR.,SECT.E:STRUCT.REP.ONLINE,2009,65,,o1348	P212121	1D	[1,0,0]	B2	2C1
YOVBIV	C12 H12 N2 O2 S1	N-Benzyl-2-pyridinesulfonamide.	Xiao-Ping Chen,Shou-Fa Han	ACTA CRYSTALLOGR.,SECT.E:STRUCT.REP.ONLINE,2009,65,,o1414	P21/c	1D	[0,0,1]	B2	2C1
YOVJID	C13 H10 Br1 N1 O4 S1	2-(4-Bromobenzenesulfonamido)benzoic acid.	M.N.Arshad,I.U.Khan,M.Akkurt,M.Shafiq,G.Mustafa	ACTA CRYSTALLOGR.,SECT.E:STRUCT.REP.ONLINE,2009,65,,o1610	C2/c	0D		B01	1M2-1
YUCCIJ	C14 H11 Cl1 N2 O4 S1	2-Chloro-5-(1-hydroxy-3-oxo-2,3-dihydro-1H-isoindol-1-yl)benzenesulfonamide.	F.T.Martins,M.D.Bocelli,R.Bonfilio,M.B.de Araujo,P.V.de Lima,P.P.Neves,M.P.Veloso,J.Ellena,A.C.Doriguetto	CRYST.GROWTH DES.,2009,9,,3235	P-1	2D	(0,1,-1)	H23	cem; Shubnikov plane net (3^3.4^2)
YUCCIJ01	C14 H11 Cl1 N2 O4 S1	2-Chloro-5-(1-hydroxy-3-oxo-2,3-dihydro-1H-isoindol-1-yl)benzenesulfonamide.	F.T.Martins,M.D.Bocelli,R.Bonfilio,M.B.de Araujo,P.V.de Lima,P.P.Neves,M.P.Veloso,J.Ellena,A.C.Doriguetto	CRYST.GROWTH DES.,2009,9,,3235	P-1	3D		H42	pcu alpha-Po primitive cubic; 6/4/c1; sqc1
YUCCIJ02	C14 H11 Cl1 N2 O4 S1	(RS)-2-Chloro-5-(1-hydroxy-3-oxo-2,3-dihydro-1H-isoindol-1-yl)benzene-1-sulfonamide.	T.Gelbrich,U.J.Griesser,M.F.Haddow	PRIVATE COMMUNICATION,2009,,,	P-1	2D	(0,1,-1)	H23	cem; Shubnikov plane net (3^3.4^2)
YUKKUK	C17 H19 N3 O3 S1	5-(Dimethylamino)-N-(3,4-dimethyl-5-isoxazolyl)-1-naphthalenesulfonamide.	P.D.Stein,D.M.Floyd,S.Bisaha,J.Dickey,R.N.Girotra,J.Z.Gougoutas,M.Kozlowski,V.G.Lee,E.C.-K.Liu,M.F.Malley,D.McMullen,C.Mitchell,S.Moreland,N.Murugesan,R.Serafino,M.L.Webb,Rongan Zhang,J.T.Hunt	J.Med.Chem.,1995,38,,1344	Pna21	1D	[0,0,1]	B2	2C1
YUPXEN	C15 H16 N2 O6 S2	N-([4-(4-Methoxybenzenesulfonamido)phenyl]sulfonyl)acetamide.	G.Mustafa,M.Akkurt,I.U.Khan,R.Naseem,B.Sajjad	ACTA CRYSTALLOGR.,SECT.E:STRUCT.REP.ONLINE,2010,66,,o1768	P21/c	2D	(0,1,0)	K4	sql/Shubnikov tetragonal plane net
ZAHBEP	C7 H12 N4 O4 S2	5-t-Butyloxycarbonylamido-1,3,4-thiadiazole-2-sulfonamide.	J.C.Pedregosa,J.Casanova,G.Alzuet,J.Borras,S.Garcia-Granda,M.R.Diaz,A.Gutierrez-Rodriguez	INORG.CHIM.ACTA,1995,232,,117	P21/n	3D		G22	dia Diamond; 4/6/c1; sqc6
ZAMROU	C18 H15 N3 O4 S1	3-Nitro-N-phenyl-4-(phenylamino)benzenesulfonamide.	M.L.Glowka,Z.Olubek,A.Olczak	ACTA CRYSTALLOGR.,SECT.C:CRYST.STRUCT.COMMUN.,1995,51,,1639	P21/c	0D		B01	1M2-1
ZAPJAD	C9 H11 N3 O3 S2	2-(Ethylsulfinyl)imidazo[1,2-a]pyridine-3-sulfonamide.	Y.Gong,H.Ma,J.Li	ACTA CRYSTALLOGR.,SECT.E:STRUCT.REP.ONLINE,2012,68,,o1342	P-1	1D	[1,0,0]	K21	SP 1-periodic net (4,4)(0,2)
ZAQQAL	C13 H10 N2 O5 S1	N-(3-Nitrobenzoyl)benzenesulfonamide.	P.A.Suchetan,S.Foro,B.T.Gowda	ACTA CRYSTALLOGR.,SECT.E:STRUCT.REP.ONLINE,2012,68,,o1507	P212121	1D	[1,0,0]	B2	2C1
ZEXVAZ	C20 H20 N4 O6 S2	1-Amino-2-nitro-4,5-bis(p-toluenesulfonamido)-benzene.	J.Bolger,A.Gourdon	ACTA CRYSTALLOGR.,SECT.C:CRYST.STRUCT.COMMUN.,1995,51,,2395	P-1	1D	[1,0,0]	K21	SP 1-periodic net (4,4)(0,2)
ZZZPUS01	C12 H18 N2 O3 S1	N-((Butylamino)-carbonyl)-4-methyl-benzenesulfonamide.	K.A.Nirmala,D.S.S.Gowda	ACTA CRYSTALLOGR.,SECT.B:STRUCT.CRYSTALLOGR.CRYST.CHEM.,1981,37,,1597	Pn21a	1D	[0,1,0]	K002	2C1
ZZZPUS04	C12 H18 N2 O3 S1	N-(Butylcarbamoyl)-4-methylbenzenesulfonamide.	S.Thirunahari,S.Aitipamula,Pui Shan Chow,R.B.H.Tan	J.Pharm.Sci.,2010,99,,2975	Pna21	1D	[0,0,1]	K002	2C1
ZZZPUS06	C12 H18 N2 O3 S1	N-(Butylcarbamoyl)-4-methylbenzenesulfonamide.	S.Thirunahari,S.Aitipamula,Pui Shan Chow,R.B.H.Tan	J.Pharm.Sci.,2010,99,,2975	P21/n	1D	[0,1,0]	K002	2C1
ZZZPUS07	C12 H18 N2 O3 S1	N-(Butylcarbamoyl)-4-methylbenzenesulfonamide.	S.Thirunahari,S.Aitipamula,Pui Shan Chow,R.B.H.Tan	J.Pharm.Sci.,2010,99,,2975	P21/c	1D	[0,0,1]	K002	2C1
ZZZPUS10	C12 H18 N2 O3 S1	N-(Butylcarbamoyl)-4-methylbenzenesulfonamide.	N.K.Nath,A.Nangia	CRYSTENGCOMM,2011,13,,47	Pbcn	1D	[0,1,0]	K002	2C1
ZZZULS01	C7 H9 N1 O2 S1	o-Toluenesulfonamide.	M.Tremayne,C.C.Seaton,C.Glidewell	ACTA CRYSTALLOGR.,SECT.B:STRUCT.SCI.,2002,58,,823	I41/a	3D		K4	gis Gismondine GIS; 4/4/t3; sqc2200
ZZZULS02	C7 H9 N1 O2 S1	2-Methylbenzenesulfonamide.	B.T.Gowda,S.Foro,K.Shakuntala,H.Fuess	ACTA CRYSTALLOGR.,SECT.E:STRUCT.REP.ONLINE,2009,65,,o2258	I41/a	3D		K4	gis Gismondine GIS; 4/4/t3; sqc2200
ACUWEC	C38 H37 N1 O3 S1 Si1	N-(2-(1,1-Diphenyl-1H-2,1-benzoxasilin-3-yl)-1-phenylpentyl)-4-methylbenzenesulfonamide.	Dongjin Kang,Sangjune Park,Taekyu Ryu,P.Ho Lee	Org.Lett.,2012,14,,3912	P21/c	0D		B01	1M2-1
BEDMIG13	C10 H13 Cl1 N2 O3 S1	4-Chloro-N-(propylaminocarbonyl)benzenesulfonamide.	Y.V.Seryotkin,T.N.Drebushchak,E.V.Boldyreva	ACTA CRYSTALLOGR.,SECT.B:STRUCT.SCI.,2013,69,,77	P212121	1D	[0,0,1]	K002	2C1
BEDMIG14	C10 H13 Cl1 N2 O3 S1	4-Chloro-N-(propylaminocarbonyl)benzenesulfonamide.	Y.V.Seryotkin,T.N.Drebushchak,E.V.Boldyreva	ACTA CRYSTALLOGR.,SECT.B:STRUCT.SCI.,2013,69,,77	P212121	1D	[0,0,1]	K002	2C1
BEDMIG15	C10 H13 Cl1 N2 O3 S1	4-Chloro-N-(propylaminocarbonyl)benzenesulfonamide.	Y.V.Seryotkin,T.N.Drebushchak,E.V.Boldyreva	ACTA CRYSTALLOGR.,SECT.B:STRUCT.SCI.,2013,69,,77	P212121	1D	[0,0,1]	K002	2C1
BEDMIG16	C10 H13 Cl1 N2 O3 S1	4-Chloro-N-(propylaminocarbonyl)benzenesulfonamide.	Y.V.Seryotkin,T.N.Drebushchak,E.V.Boldyreva	ACTA CRYSTALLOGR.,SECT.B:STRUCT.SCI.,2013,69,,77	P212121	1D	[0,0,1]	K002	2C1
BEDMIG17	C10 H13 Cl1 N2 O3 S1	4-Chloro-N-(propylaminocarbonyl)benzenesulfonamide.	Y.V.Seryotkin,T.N.Drebushchak,E.V.Boldyreva	ACTA CRYSTALLOGR.,SECT.B:STRUCT.SCI.,2013,69,,77	P2111	1D	[0,0,1]	K002	2C1
BEDMIG18	C10 H13 Cl1 N2 O3 S1	4-Chloro-N-(propylaminocarbonyl)benzenesulfonamide.	Y.V.Seryotkin,T.N.Drebushchak,E.V.Boldyreva	ACTA CRYSTALLOGR.,SECT.B:STRUCT.SCI.,2013,69,,77	P2111	1D	[0,0,1]	K002	2C1
BEGWOB	C15 H23 N1 O5 S1 Si1	N-(6-Methoxy-4-oxo-3,4-dihydro-2H-chromen-3-yl)-2-(trimethylsilyl)ethanesulfonamide.	Y.Fukunaga,T.Uchida,Y.Ito,K.Matsumoto,T.Katsuki	Org.Lett.,2012,14,,4658	P212121	1D	[1,0,0]	B2	2C1
BEWYAF	C22 H22 N2 O2 S1	4-Methyl-N-(2-phenyl-1,2,3,4-tetrahydroquinolin-3-yl)benzenesulfonamide.	Xian-Feng Cai,Mu-Wang Chen,Zhi-Shi Ye,Ran-Ning Guo,Lei Shi,Yan-Qin Li,Yong-Gui Zhou	Chem.Asian J.,2013,8,,1381	P212121	1D	[1,0,0]	B2	2C1
BOVBOE01	C14 H19 N3 O2 S1	N-(2-Aminoethyl)-5-(dimethylamino)naphthalene-1-sulfonamide.	R.C.Knighton,M.R.Sambrook,J.C.Vincent,S.A.Smith,C.J.Serpell,J.Cookson,M.S.Vickers,P.D.Beer	CHEM.COMMUN.,2013,49,,2293	P21cn	1D	[1,0,0]	B2	2C1
CECJEB	C24 H23 N1 O3 S1	4-Methyl-N-((1-oxo-1,2,3,4-tetrahydronaphthalen-2-yl)(phenyl)methyl)benzenesulfonamide.	Qunsheng Guo,John Cui-Gao Zhao,H.Arman	TETRAHEDRON LETT.,2012,53,,4866	P-1	0D		B01	1M2-1
CECJIF	C24 H25 N1 O3 S1	N-((1-Hydroxy-1,2,3,4-tetrahydronaphthalen-2-yl)(phenyl)methyl)-4-methylbenzenesulfonamide.	Qunsheng Guo,John Cui-Gao Zhao,H.Arman	TETRAHEDRON LETT.,2012,53,,4866	P21/n	1D	[0,1,0]	T02	2C1
CEDCAR	C14 H12 N2 O3 S1	4-Cyano-N-(4-methoxyphenyl)benzenesulfonamide.	T.Gelbrich,T.L.Threlfall,M.B.Hursthouse	ACTA CRYSTALLOGR.,SECT.C:CRYST.STRUCT.COMMUN.,2012,68,,o421	Pna21	1D	[0,0,1]	B2	2C1
CEDCEV	C14 H12 F3 N1 O3 S1	N-(4-Methoxyphenyl)-4-(trifluoromethyl)benzenesulfonamide.	T.Gelbrich,T.L.Threlfall,M.B.Hursthouse	ACTA CRYSTALLOGR.,SECT.C:CRYST.STRUCT.COMMUN.,2012,68,,o421	Pna21	1D	[0,0,1]	B2	2C1
CEDCIZ	C13 H12 I1 N1 O3 S1	4-Iodo-N-(4-methoxyphenyl)benzenesulfonamide.	T.Gelbrich,T.L.Threlfall,M.B.Hursthouse	ACTA CRYSTALLOGR.,SECT.C:CRYST.STRUCT.COMMUN.,2012,68,,o421	Pna21	1D	[0,0,1]	B2	2C1
CEDCOF	C13 H12 Br1 N1 O3 S1	4-Bromo-N-(4-methoxyphenyl)benzenesulfonamide.	T.Gelbrich,T.L.Threlfall,M.B.Hursthouse	ACTA CRYSTALLOGR.,SECT.C:CRYST.STRUCT.COMMUN.,2012,68,,o421	Pna21	1D	[0,0,1]	B2	2C1
CEDDAS	C13 H12 Cl1 N1 O3 S1	4-Chloro-N-(4-methoxyphenyl)benzenesulfonamide.	T.Gelbrich,T.L.Threlfall,M.B.Hursthouse	ACTA CRYSTALLOGR.,SECT.C:CRYST.STRUCT.COMMUN.,2012,68,,o421	Pna21	1D	[0,0,1]	B2	2C1
CEDDEW	C13 H12 F1 N1 O3 S1	4-Fluoro-N-(4-methoxyphenyl)benzenesulfonamide.	T.Gelbrich,T.L.Threlfall,M.B.Hursthouse	ACTA CRYSTALLOGR.,SECT.C:CRYST.STRUCT.COMMUN.,2012,68,,o421	Pna21	1D	[0,0,1]	B2	2C1
CEDDIA	C13 H12 Cl1 N1 O3 S1	N-(4-Chlorophenyl)-4-methoxybenzenesulfonamide.	T.Gelbrich,T.L.Threlfall,M.B.Hursthouse	ACTA CRYSTALLOGR.,SECT.C:CRYST.STRUCT.COMMUN.,2012,68,,o421	Pna21	1D	[0,0,1]	B2	2C1
CEDDOG	C13 H10 N2 O2 S1	4-Cyano-N-phenylbenzenesulfonamide.	T.Gelbrich,T.L.Threlfall,M.B.Hursthouse	ACTA CRYSTALLOGR.,SECT.C:CRYST.STRUCT.COMMUN.,2012,68,,o421	Pna21	1D	[0,0,1]	B2	2C1
CEDFAU	C12 H13 F1 N2 O3 S1	(S)-(-)-4-Fluoro-N-(1-hydroxypropan-2-yl)isoquinoline-5-sulfonamide.	S.Ohba,N.Gomi,T.Ohgiya,K.Shibuya	ACTA CRYSTALLOGR.,SECT.C:CRYST.STRUCT.COMMUN.,2012,68,,o427	P21	2D	(1,0,0)	K4*B2	New topology
CEFMEH	C14 H14 N2 O4 S1	N-(3,5-Dimethylphenyl)-2-nitrobenzenesulfonamide.	U.Chaithanya,S.Foro,B.T.Gowda	ACTA CRYSTALLOGR.,SECT.E:STRUCT.REP.ONLINE,2012,68,,o2823	P21/c	1D	[0,1,0]	B2*0D	2C1
CEFMUX	C9 H8 N2 O2 S1	Quinoline-8-sulfonamide.	K.Marciniec,A.Maslankiewicz,M.Nowak,J.Kusz	ACTA CRYSTALLOGR.,SECT.E:STRUCT.REP.ONLINE,2012,68,,o2826	P21/n	0D		B01	1M2-1
CEFWAN	C12 H10 N2 O4 S1	4-Nitro-N-phenylbenzenesulfonamide.	U.Chaithanya,S.Foro,B.T.Gowda	ACTA CRYSTALLOGR.,SECT.E:STRUCT.REP.ONLINE,2012,68,,o2872	Cc	1D	[1,0,0]	B2	2C1
CEGKAC	C18 H16 Cl1 N3 O5 S2	N-(4-Chlorophenyl)-1-(5-(((2-phenylvinyl)sulfonyl)methyl)-1,3,4-oxadiazol-2-yl)methanesulfonamide.	A.Muralikrishna,M.Kannan,V.Padmavathi,A.Padmaja,R.Krishna	ACTA CRYSTALLOGR.,SECT.E:STRUCT.REP.ONLINE,2012,68,,o2954	P21/c	1D	[0,0,1]	B2	2C1
CEYDIV	C17 H28 N2 O2 S1	(1R,2R,5R)-N-(2-Amino-5-isopropyl-2-methyl-cyclohexyl)-4-methyl-benzenesulfonamide.	P.Roszkowski,J.K.Maurin,Z.Czarnocki	TETRAHEDRON:ASYMM.,2013,24,,643	P21	1D	[0,1,0]	B2	2C1
CEYDOB	C17 H28 N2 O2 S1	(1S,2S,4R)-N-(2-Amino-4-isopropyl-1-methyl-cyclohexyl)-4-methyl-benzenesulfonamide.	P.Roszkowski,J.K.Maurin,Z.Czarnocki	TETRAHEDRON:ASYMM.,2013,24,,643	P21	1D	[0,1,0]	B2	2C1
CEZGEV	C20 H23 N1 O3 S1	N-(2-Isopropoxy-1,2-dihydronaphthalen-1-yl)-4-methylbenzenesulfonamide.	Dingqiao Yang,Jiuyun Xia,Yuhua Long,Zhongyi Zeng,Xiongjun Zuo,Sanyong Wang,Chunrong Li	ORG.BIOMOL.CHEM.,2013,11,,4871	P21/c	0D		B01	1M2-1
DEHGEE	C15 H21 N1 O2 S1	N-(1-(Cyclohex-1-en-1-yl)ethyl)-4-methylbenzenesulfonamide.	A.-F.Voica,A.Mendoza,W.R.Gutekunst,J.Otero,P.S.Baran	Nature Chemistry,2012,4,,629	P21	1D	[0,1,0]	B2	2C1
DEHGUU	C27 H35 N1 O2 S1	N-(Abieta-2,8(14),9(11),12-tetraen-18-yl)-4-methylbenzenesulfonamide.	A.-F.Voica,A.Mendoza,W.R.Gutekunst,J.Otero,P.S.Baran	Nature Chemistry,2012,4,,629	P212121	1D	[0,1,0]	B2	2C1
ECEWOA	C15 H20 N2 O7 S1	N-(2-Hydroxy-1-(4-isopropyl-5-oxotetrahydrofuran-2-yl)ethyl)-2-nitrobenzenesulfonamide.	Y.Nakamura,Y.Ogawa,C.Suzuki,T.Fujimoto,S.Miyazaki,K.Tamaki,T.Nishi,H.Suemune	Heterocycles,2011,83,,1587	P212121	1D	[1,0,0]	K4	SP 1-periodic net (3,6)(1,2)
ECIJAD	C24 H18 Br1 N1 O2 S1	(S)-N-(5-(4-Bromophenyl)-1-phenylpenta-2,4-diyn-1-yl)-4-methylbenzenesulfonamide.	Tian-Lin Liu,Heng-Xia Zhang,Yan Zheng,Qingwei Yao,Jun-An Ma	CHEM.COMMUN.,2012,48,,12234	P21/c	1D	[1,0,0]	B2	2C1
EDELAC	C19 H17 N1 O2 S1	N-(2-(1-Naphthyl)-2-phenylvinyl)methanesulfonamide.	N.Selander,B.T.Worrell,S.Chuprakov,S.Velaparthi,V.V.Fokin	J.AM.CHEM.SOC.,2012,134,,14670	P21/n	0D		T11*M1	1,2M4-1
EFAKED	C12 H10 Br1 Cl1 N2 O2 S1	N-(2-Amino-5-chlorophenyl)-2-bromobenzenesulfonamide.	M.Altamura,V.Fedi,R.Nannicini,P.Paoli,P.Rossi	ACTA CRYSTALLOGR.,SECT.E:STRUCT.REP.ONLINE,2012,68,,o3308	P21/c	2D	(1,0,0)	K21	hcb; Shubnikov hexagonal plane net/(6,3)
FEXDIX	C23 H21 N1 O4 S1	N-(2-Benzoyl-3-hydroxy-2,3-dihydro-1H-inden-1-yl)-4-methylbenzenesulfonamide.	Hui Qian,Wanxiang Zhao,H.H.-Y.Sung,I.D.Williams,Jianwei Sun	CHEM.COMMUN.,2013,49,,4361	C2/c	1D	[0,1,0]	K4	SP 1-periodic net (3,6)(1,2)
GEQDEN	C6 H11 F3 N2 O2 S1	1,1,1-Trifluoro-N-(pyrrolidin-2-ylmethyl)methanesulfonamide.	A.L.Rheingold	PRIVATE COMMUNICATION,2012,,,	P21	0D		M1	1M2-1
HAZSAE	C17 H23 N1 O2 S1	4-Methyl-N-(2-methyl-5-(prop-1-en-2-yl)cyclohex-2-en-1-yl)benzenesulfonamide.	V.Ganesh,D.Sureshkumar,D.Chanda,S.Chandrasekaran	Chem.-Eur.J.,2012,18,,12498	P212121	1D	[1,0,0]	B2	2C1
KEKDUB	C14 H14 Cl1 N1 O3 S1	N-(3-Chloro-4-hydroxy-2,5-dimethylphenyl)benzenesulfonamide.	A.P.Avdeenko,S.A.Konovalova,O.N.Mikhailichenko,A.L.Yusina,A.A.Santalova,G.V.Palamarchuk,R.I.Zubatyuk,O.V.Shishkin,K.S.Burmistrov	ZH.ORG.KHIM.(RUSS.)(RUSS.J.ORG.CHEM.),2011,47,,1151	P21/c	2D	(1,0,0)	K4	sql/Shubnikov tetragonal plane net
KEPNUQ	C13 H20 Cl1 N1 O2 S1	N-(3-Chloro-4-methylpentan-2-yl)-4-methylbenzenesulfonamide.	G.R.Stanton,P.-O.Norrby,P.J.Carroll,P.J.Walsh	J.AM.CHEM.SOC.,2012,134,,17599	P21/n	0D		B01	1M2-1
KEPPAY	C20 H24 Cl1 N1 O2 S1	N-(4-Chloro-5-methyl-1-phenylhex-1-en-3-yl)-4-methylbenzenesulfonamide.	G.R.Stanton,P.-O.Norrby,P.J.Carroll,P.J.Walsh	J.AM.CHEM.SOC.,2012,134,,17599	P21/c	1D	[0,1,0]	B2	2C1
KERPAA	C17 H15 N1 O2 S1	4-Methyl-N-(1-naphthyl)benzenesulfonamide.	K.Sarojini,H.Krishnan,C.C.Kanagam,S.Muthu	Spectrochim.Acta,Part A,2012,96,,657	P-1	0D		B01	1M2-1
KERPAA	C17 H15 N1 O2 S1	4-Methyl-N-(1-naphthyl)benzenesulfonamide.	K.Sarojini,H.Krishnan,C.C.Kanagam,S.Muthu	Spectrochim.Acta,Part A,2012,96,,657	P-1	0D		B01	1M2-1
KIRLOO	C24 H27 N1 O5 S1	N-(3,4-Dimethoxybenzyl)-N-(2-hydroxy-2-phenylethyl)-4-methylbenzenesulfonamide.	Shaowu Wang,Zhuo Chai,Shaowu Wang,Xiancui Zhu,Yun Wei	Org.Lett.,2013,52,,2628	C2/c	1D	[0,1,0]	B2	2C1
KUSVEZ03	C7 H9 N1 O2 S1	4-Methylbenzenesulfonamide.	T.N.Drebushchak,N.A.Pankrushina,A.N.Mikheev,M.K.A.Thumm	CRYSTENGCOMM,2013,15,,3582	P1	2D	(0,0,1)	K4	sql/Shubnikov tetragonal plane net
LESJOK	C19 H17 N1 O4 S1	2-(Naphthalene-1-sulfonamido)-3-phenylpropanoic acid.	H.Mubashar-ur-Rehman,M.N.Arshad,A.M.Asiri,I.U.Khan,M.Bilal	ACTA CRYSTALLOGR.,SECT.E:STRUCT.REP.ONLINE,2013,69,,o194	P21/n	1D	[1,0,0]	K02	2C1
LESZUG	C16 H14 Cl1 N3 O2 S1	4-(5-(4-Chlorophenyl)-3-methyl-1H-pyrazol-1-yl)benzenesulfonamide.	M.A.Farrukh,S.K.Mohamed,M.Ahmed,A.A.Marzouk,S.M.El-Moghazy	ACTA CRYSTALLOGR.,SECT.E:STRUCT.REP.ONLINE,2013,69,,o295	P21/c	2D	(1,0,0)	T21	hcb; Shubnikov hexagonal plane net/(6,3)
LETKEC	C13 H17 N3 O3 S1	N-(3-Isopropyl-2-oxoimidazolidin-4-ylidene)-4-methylbenzenesulfonamide.	M.Garcia-Valverde,S.Marcaccini,A.Gonzalez-Ortega,F.J.Rodriguez,J.Rojo,T.Torroba	ORG.BIOMOL.CHEM.,2013,11,,721	P21/c	0D		B01	1M2-1
LETKIG	C23 H27 N3 O3 S1	N-(3-Benzyl-4-oxo-1,3-diazaspiro[4.6]undec-2-ylidene)-4-methylbenzenesulfonamide.	M.Garcia-Valverde,S.Marcaccini,A.Gonzalez-Ortega,F.J.Rodriguez,J.Rojo,T.Torroba	ORG.BIOMOL.CHEM.,2013,11,,721	P21	1D	[0,1,0]	B2	2C1
MEGKUG	C28 H33 N1 O3 S1	N-(4-((2-Cyclohexylpropoxy)methyl)phenyl)biphenyl-4-sulfonamide.	Chu-Ting Yang,Zhen-Qi Zhang,Jun Liang,Jing-Hui Liu,Xiao-Yu Lu,Huan-Huan Chen,Lei Liu	J.AM.CHEM.SOC.,2012,134,,11124	P21	1D	[0,1,0]	B2	2C1
MEGZAB	C25 H23 N3 O3 S1	5-(Dimethylamino)-N-(2-((2-hydroxybenzylidene)amino)phenyl)naphthalene-1-sulfonamide.	M.J.Romero,R.Pedrido,A.M.Gonzalez-Noya,M.Maneiro,M.I.Fernandez-Garcia,G.Zaragoza,M.R.Bermejo	DALTON TRANS.,2012,41,,10832	P-1	0D		B01	1M2-1
MEHDIO	C20 H25 N1 O2 S1	N-(1-Butyl-2,3-dihydro-1H-inden-2-yl)-4-methylbenzenesulfonamide.	Chung-Yang Huang,A.G.Doyle	J.AM.CHEM.SOC.,2012,134,,9541	P-1	0D		B01	1M2-1
MEHDOU	C19 H25 N1 O2 S1	(S)-4-Methyl-N-(2-phenylhexyl)benzenesulfonamide.	Chung-Yang Huang,A.G.Doyle	J.AM.CHEM.SOC.,2012,134,,9541	P21	1D	[0,1,0]	B2	2C1
MEYGAA	C23 H21 N1 O4 S1	N-(4-[(E)-3-(4-Ethoxyphenyl)prop-2-epsilonnoyl]phenyl)benzenesulfonamide.	M.R.C.de Castro,A.Q.Aragao,H.B.Napolitano,C.Noda-Perez,F.T.Martins	ACTA CRYSTALLOGR.,SECT.C:CRYST.STRUCT.COMMUN.,2013,69,,267	P21/c	1D	[0,0,1]	B2	2C1
MEYGEE	C22 H19 N1 O4 S1	N-(4-[(E)-3-(4-Methoxyphenyl)prop-2-enoyl]phenyl)benzenesulfonamide.	M.R.C.de Castro,A.Q.Aragao,H.B.Napolitano,C.Noda-Perez,F.T.Martins	ACTA CRYSTALLOGR.,SECT.C:CRYST.STRUCT.COMMUN.,2013,69,,267	P-1	1D	[0,0,1]	B2	2C1
PECSOH	C12 H9 Cl1 N2 O4 S1	N-(3-Chlorophenyl)-4-nitrobenzenesulfonamide.	U.Chaithanya,S.Foro,B.T.Gowda	ACTA CRYSTALLOGR.,SECT.E:STRUCT.REP.ONLINE,2012,68,,o3424	P21/n	1D	[1,0,0]	B2	2C1
PECSUN	C14 H14 N2 O4 S1	N-(3,5-Dimethylphenyl)-4-nitrobenzenesulfonamide.	U.Chaithanya,S.Foro,B.T.Gowda	ACTA CRYSTALLOGR.,SECT.E:STRUCT.REP.ONLINE,2012,68,,o3425	Pna21	1D	[1,0,0]	B2	2C1
PECSUN	C14 H14 N2 O4 S1	N-(3,5-Dimethylphenyl)-4-nitrobenzenesulfonamide.	U.Chaithanya,S.Foro,B.T.Gowda	ACTA CRYSTALLOGR.,SECT.E:STRUCT.REP.ONLINE,2012,68,,o3425	Pna21	1D	[1,0,0]	B2	2C1
PECTAU	C14 H14 N2 O4 S1	N-(2,5-Dimethylphenyl)-2-nitrobenzenesulfonamide.	U.Chaithanya,S.Foro,B.T.Gowda	ACTA CRYSTALLOGR.,SECT.E:STRUCT.REP.ONLINE,2012,68,,o3426	P-1	0D		B01	1M2-1
PECTOI	C11 H15 Cl1 N2 O3 S1	4-(3-Chloro-2,2-dimethylpropanamido)benzenesulfonamide.	S.P.Yalcin,M.Akkurt,M.Durgun,B.Turkkan,H.Turkmen	ACTA CRYSTALLOGR.,SECT.E:STRUCT.REP.ONLINE,2012,68,,o3430	P21/c	2D	(1,0,0)	P41	SP 2-periodic net (4,4)Ia; SnS
PEDCUY	C12 H8 Cl2 N2 O4 S1	N-(3,5-Dichlorophenyl)-2-nitrobenzenesulfonamide.	U.Chaithanya,S.Foro,B.T.Gowda	ACTA CRYSTALLOGR.,SECT.E:STRUCT.REP.ONLINE,2012,68,,o3482	P-1	0D		B01	1M2-1
PEFJUH	C18 H15 N1 O3 S1	N-(2-Phenoxyphenyl)benzenesulfonamide.	S.Terada,K.Katagiri,H.Masu,H.Danjo,Y.Sei,M.Kawahata,M.Tominaga,K.Yamaguchi,I.Azumaya	CRYST.GROWTH DES.,2012,12,,2908	P21/n	0D		B01	1M2-1
PEFKAO	C18 H14 F1 N1 O3 S1	2-Fluoro-N-(2-phenoxyphenyl)benzenesulfonamide.	S.Terada,K.Katagiri,H.Masu,H.Danjo,Y.Sei,M.Kawahata,M.Tominaga,K.Yamaguchi,I.Azumaya	CRYST.GROWTH DES.,2012,12,,2908	P21/n	0D		B01	1M2-1
PEFKAO01	C18 H14 F1 N1 O3 S1	2-Fluoro-N-(2-phenoxyphenyl)benzenesulfonamide.	S.Terada,K.Katagiri,H.Masu,H.Danjo,Y.Sei,M.Kawahata,M.Tominaga,K.Yamaguchi,I.Azumaya	CRYST.GROWTH DES.,2012,12,,2908	P-1	0D		T0001	1M2-1
PEFKOC	C18 H14 F1 N1 O3 S1	3-Fluoro-N-(2-phenoxyphenyl)benzenesulfonamide.	S.Terada,K.Katagiri,H.Masu,H.Danjo,Y.Sei,M.Kawahata,M.Tominaga,K.Yamaguchi,I.Azumaya	CRYST.GROWTH DES.,2012,12,,2908	P21/n	0D		B01	1M2-1
PEFKOC01	C18 H14 F1 N1 O3 S1	3-Fluoro-N-(2-phenoxyphenyl)benzenesulfonamide.	S.Terada,K.Katagiri,H.Masu,H.Danjo,Y.Sei,M.Kawahata,M.Tominaga,K.Yamaguchi,I.Azumaya	CRYST.GROWTH DES.,2012,12,,2908	P21/n	0D		B01	1M2-1
PEFKUI	C18 H14 F1 N1 O3 S1	4-Fluoro-N-(2-phenoxyphenyl)benzenesulfonamide.	S.Terada,K.Katagiri,H.Masu,H.Danjo,Y.Sei,M.Kawahata,M.Tominaga,K.Yamaguchi,I.Azumaya	CRYST.GROWTH DES.,2012,12,,2908	P-1	0D		B01	1M2-1
PEFLET	C18 H10 F5 N1 O3 S1	2,3,4,5,6-Pentafluoro-N-(2-phenoxyphenyl)benzenesulfonamide.	S.Terada,K.Katagiri,H.Masu,H.Danjo,Y.Sei,M.Kawahata,M.Tominaga,K.Yamaguchi,I.Azumaya	CRYST.GROWTH DES.,2012,12,,2908	P21/n	0D		B01	1M2-1
QECLER	C13 H12 N2 O4 S1	N-(3-Methylphenyl)-2-nitrobenzenesulfonamide.	U.Chaithanya,S.Foro,B.T.Gowda	ACTA CRYSTALLOGR.,SECT.E:STRUCT.REP.ONLINE,2012,68,,o2627	P21/c	1D	[0,1,0]	B2	2C1
QECPIZ	C13 H12 N2 O4 S1	N-(2-Methylphenyl)-2-nitrobenzenesulfonamide.	U.Chaithanya,S.Foro,B.T.Gowda	ACTA CRYSTALLOGR.,SECT.E:STRUCT.REP.ONLINE,2012,68,,o2649	P21/c	1D	[0,0,1]	B2	2C1
QEWDUT	C18 H17 F2 N3 O4 S1	N-(2,4-Difluorophenyl)-3-ethyl-3-methyl-2,5-dioxo-2,3,4,5-tetrahydro-1H-1,4-benzodiazepine-7-sulfonamide.	J.G.Barlind,L.K.Buckett,S.G.Crosby,O.Davidsson,H.Emtenas,A.Ertan,U.Jurva,M.Lemurell,P.M.Gutierrez,K.Nilsson,G.OMahony,A.U.Petersson,A.Redzic,F.Wagberg,Zhong-Qing Yuan	BIOORG.MED.CHEM.LETT.,2013,23,,2721	P21	2D	(0,0,1)	G03	hcb; Shubnikov hexagonal plane net/(6,3)
RENCEU	C17 H24 Br1 Cl1 N2 O5 S1	N-(2-((1-(Bromomethyl)cycloheptyl)oxy)-3-chloropropyl)-4-nitrobenzenesulfonamide.	Jing Zhou,Ling Zhou,Ying-Yeung Yeung	Org.Lett.,2012,14,,5250	P21/c	0D		B01	1M2-1
REPWOA	C20 H18 N2 O2 S1	N-(9-Ethyl-9H-carbazol-3-yl)benzenesulfonamide.	S.Sudalai Kumar,S.Rana,Ashwini Nangia	Chem.Asian J.,2013,8,,1551	C2/c	0D		B01	1M2-1
REPWUG	C21 H17 F3 N2 O2 S1	N-(9-Ethyl-9H-carbazol-3-yl)-3-(trifluoromethyl)benzenesulfonamide.	S.Sudalai Kumar,S.Rana,Ashwini Nangia	Chem.Asian J.,2013,8,,1551	P21/n	1D	[0,1,0]	B2	2C1
REPWUG01	C21 H17 F3 N2 O2 S1	N-(9-Ethyl-9H-carbazol-3-yl)-3-(trifluoromethyl)benzenesulfonamide.	S.Sudalai Kumar,S.Rana,Ashwini Nangia	Chem.Asian J.,2013,8,,1551	P-1	1D	[1,0,0]	B2	2C1
REPXER	C20 H17 N3 O4 S1	N-(9-Ethyl-9H-carbazol-3-yl)-2-nitrobenzenesulfonamide.	S.Sudalai Kumar,S.Rana,Ashwini Nangia	Chem.Asian J.,2013,8,,1551	Pbca	1D	[0,1,0]	B2	2C1
REPXUH	C21 H17 F3 N2 O2 S1	N-(9-Ethyl-9H-carbazol-3-yl)-4-(trifluoromethyl)benzenesulfonamide.	S.Sudalai Kumar,S.Rana,Ashwini Nangia	Chem.Asian J.,2013,8,,1551	P21	1D	[0,1,0]	B2	2C1
REXXAV	C11 H17 N3 O3 S1	2-(2-Aminophenylsulfonamido)-N,2-dimethylpropanamide.	S.S.Kale,G.Priya,A.S.Kotmale,R.L.Gawade,V.G.Puranik,P.R.Rajamohanan,G.J.Sanjayan	CHEM.COMMUN.,2013,49,,2222	P21/c	1D	[0,1,0]	B2	2C1
RIDGOC	C21 H24 N4 O6 S1	5-(Dimethylamino)-N-(1-(4-hydroxy-5-(hydroxymethyl)tetrahydrofuran-2-yl)-2-oxo-1,2-dihydropyrimidin-4-yl)naphthalene-1-sulfonamide.	Ki Tae Kim,Hyun Woo Kim,Dohyun Moon,Young Min Rhee,Byeang Hyean Kim	ORG.BIOMOL.CHEM.,2013,11,,5605	P21	1D	[0,1,0]	B2	2C1
SEBZUW	C24 H27 Br1 N4 O4 S2	N-(2-((5-Bromo-2-(morpholin-4-yl)pyrimidin-4-yl)sulfanyl)-4-methoxyphenyl)-2,4,6-trimethylbenzenesulfonamide.	M.Kumar,L.Mallesha,M.A.Sridhar,K.Kapoor,V.K.Gupta,R.Kant	ACTA CRYSTALLOGR.,SECT.E:STRUCT.REP.ONLINE,2012,68,,o3061	P21/n	1D	[0,1,0]	B2	2C1
SECWII	C14 H14 N2 O4 S1	N-(2,3-Dimethylphenyl)-2-nitrobenzenesulfonamide.	U.Chaithanya,S.Foro,B.T.Gowda	ACTA CRYSTALLOGR.,SECT.E:STRUCT.REP.ONLINE,2012,68,,o3188	P-1	0D		B01	1M2-1
SECWII	C14 H14 N2 O4 S1	N-(2,3-Dimethylphenyl)-2-nitrobenzenesulfonamide.	U.Chaithanya,S.Foro,B.T.Gowda	ACTA CRYSTALLOGR.,SECT.E:STRUCT.REP.ONLINE,2012,68,,o3188	P-1	0D		B01	1M2-1
SEDLIY	C11 H17 N1 O4 S1	N,N-bis(2-hydroxyethyl)-4-methylbenzenesulfonamide.	N.Mushtaq,I.U.Khan,M.Yar,S.Afzal,J.Simpson	ACTA CRYSTALLOGR.,SECT.E:STRUCT.REP.ONLINE,2012,68,,o3142	Pbca	1D	[0,1,0]	B2	2C1
SEFKAR	C16 H20 N2 O4 S2	N,N'-Ethane-1,2-diylbis(3-methylbenzenesulfonamide).	H.Alyar,S.Alyar,A.Unal,N.Ozbek,E.Sahin,N.Karacan	J.MOL.STRUCT.,2012,1028,,116	P21/c	2D	(1,0,0)	K4	sql/Shubnikov tetragonal plane net
SERKAD	C19 H16 Cl1 N1 O2 S1	N-(5-Chlorobiphenyl-2-yl)-4-methylbenzenesulfonamide.	Liuqun Gu,Ting Lu,Mingyun Zhang,Lijuan Tou,Yugen Zhang	ADV.SYNTH.CATAL.,2013,355,,1077	P-1	0D		B01	1M2-1
SERKEH	C19 H15 Cl2 N1 O2 S1	N-(3,5-Dichlorobiphenyl-2-yl)-4-methylbenzenesulfonamide.	Liuqun Gu,Ting Lu,Mingyun Zhang,Lijuan Tou,Yugen Zhang	ADV.SYNTH.CATAL.,2013,355,,1077	P-1	0D		B01	1M2-1
SEWNUF	C23 H23 F1 N8 O7 S1	(R)-3-((4-((2-(4-Fluorophenylsulfonamido)-3-methylbutanamido)methyl)-1H-1,2,3-triazol-1-yl)methyl)-4-(4-nitrophenyl)-1,2,5-oxadiazole 2-oxide.	I.T.Schiefer,L.VandeVrede,M.Fa,O.Arancio,G.R.J.Thatcher	J.Med.Chem.,2012,55,,3076	P212121	1D	[1,0,0]	K02	2C1
SULDAZ05	C10 H10 N4 O2 S1	4-Amino-N-(pyrimidin-2-yl)benzenesulfonamide.	Fangfang Pan,Ruimin Wang,U.Englert	CRYSTENGCOMM,2013,15,,1164	P21/c	2D	(1,0,0)	K21	hcb; Shubnikov hexagonal plane net/(6,3)
SULDAZ06	C10 H10 N4 O2 S1	4-Amino-N-(pyrimidin-2-yl)benzenesulfonamide.	Fangfang Pan,Ruimin Wang,U.Englert	CRYSTENGCOMM,2013,15,,1164	P21/c	2D	(1,0,0)	K21	hcb; Shubnikov hexagonal plane net/(6,3)
TEMBEU	C14 H15 N1 O2 S1	N-(4'-Methylbiphenyl-4-yl)methanesulfonamide.	C.B.Baltus,N.J.Press,M.D.Antonijevic,G.J.Tizzard,S.J.Coles,J.Spencer	TETRAHEDRON,2012,68,,9272	Pbca	0D		B01	1M2-1
VEGTIM	C11 H9 I1 N2 O2 S1	N-(5-Iodopyridin-2-yl)benzenesulfonamide.	T.Gelbrich,T.L.Threlfall,M.B.Hursthouse	CRYSTENGCOMM,2012,14,,5454	P21/c	0D		B01	1M2-1
VEKQOT	C10 H10 Cl1 F1 N2 O4 S1	5-(Chloromethyl)-N-(3-fluorophenyl)-2-oxo-1,3-oxazolidine-3-sulfonamide.	C.Barbey,R.Bouasla,M.Berredjem,N.Dupont,P.Retailleau,N.-E.Aouf,M.Lecouvey	TETRAHEDRON,2012,68,,9125	P21/c	0D		B01	1M2-1
VEMJUU	C17 H24 N4 O2 S1	(1S,2S,4R)-(+)-N-(2-Azido-1-methyl-4-(prop-1-en-2-yl)cyclohexyl)-4-methylbenzenesulfonamide.	P.Roszkowski,J.K.Maurin,Z.Czarnocki	TETRAHEDRON:ASYMM.,2012,23,,1106	P212121	1D	[1,0,0]	B2	2C1
VIBQUU	C21 H18 N2 O2 S2	N-(2-(1,2,3,4-Tetrahydrocyclopenta[b]indol-3-yl)phenyl)thiophene-2-sulfonamide.	B.Prasad,B.Yogi Sreenivas,G.Rama Krishna,R.Kapavarapu,Manojit Pal	CHEM.COMMUN.,2013,49,,6716	P-1	0D		B01	1M2-1
WECKEW	C16 H19 N1 O5 S1	N-(1-(5-Ethynyl-4-methyl-2-oxo-1,3-dioxolan-4-yl)propyl)-4-methylbenzenesulfonamide.	A.Kulshrestha,N.S.Marzijarani,K.D.Ashtekar,R.Staples,B.Borhan	Org.Lett.,2012,14,,3592	P-1	0D		B01	1M2-1
XELFOL	C31 H36 N2 O5 S1	N-(2-((4-Benzyl-2-oxo-1,3-oxazolidin-3-yl)carbonyl)-2-methyl-1-phenylhexyl)-4-methylbenzenesulfonamide.	Y.Minko,M.Pasco,L.Lercher,M.Botoshansky,I.Marek	NATURE (LONDON),2012,490,,522	P21	1D	[0,0,1]	B2	2C1
YAZHOY	C14 H21 N3 O4 S1	(S)-2-(2-acetamidophenylsulfonamido)-N,3-dimethylbutanamide.	K.N.Vijayadas,H.C.Davis,A.S.Kotmale,R.L.Gawade,V.G.Puranik,P.R.Rajamohanan,G.J.Sanjayan	CHEM.COMMUN.,2012,48,,9747	P21	1D	[1,0,0]	K02	2C1
YAZHUE	C13 H19 N3 O4 S1	Methyl 2-(2-acetamidophenylsulfonamido)-2-methylpropanoate.	K.N.Vijayadas,H.C.Davis,A.S.Kotmale,R.L.Gawade,V.G.Puranik,P.R.Rajamohanan,G.J.Sanjayan	CHEM.COMMUN.,2012,48,,9747	C2/c	2D	(1,0,-1)	G41*K4	4,5L70
YAZJEQ	C14 H20 N2 O5 S1	(S)-Methyl 2-(2-acetamidophenylsulfonamido)-3-methylbutanoate.	K.N.Vijayadas,H.C.Davis,A.S.Kotmale,R.L.Gawade,V.G.Puranik,P.R.Rajamohanan,G.J.Sanjayan	CHEM.COMMUN.,2012,48,,9747	C2	1D	[1,1,0];[1,-1,0]	T02	2C1
YAZJIU	C13 H18 N2 O5 S1	Methyl 2-(2-acetamidophenylsulfonamido) acetate.	K.N.Vijayadas,H.C.Davis,A.S.Kotmale,R.L.Gawade,V.G.Puranik,P.R.Rajamohanan,G.J.Sanjayan	CHEM.COMMUN.,2012,48,,9747	P21/c	1D	[0,1,0]	B2	2C1
YEBFUI	C7 H6 N2 O2 S1	4-Cyanobenzenesulfonamide.	G.E.Cami,M.E.C.Villalba,P.Colinas,G.A.Echeverria,G.Estiu,D.B.Soria	J.MOL.STRUCT.,2012,1024,,110	Pnma	2D	(1,0,0)	K4	sql/Shubnikov tetragonal plane net
YEKDUP	C20 H20 F3 N3 O5 S1	N-(4-(4-Cyano-3-(trifluoromethyl)phenyl)-1,7-dimethyl-3,5-dioxo-10-oxa-4-azatricyclo[5.2.1.0^2,6^]dec-8-yl)ethanesulfonamide.	R.M.Attar,M.Jure-Kunkel,A.Balog,M.E.Cvijic,J.Dell-John,C.A.Rizzo,L.Schweizer,T.E.Spires,J.S.Platero,M.Obermeier,W.Shan,M.E.Salvati,W.R.Foster,J.Dinchuk,Shen-Jue Chen,G.Vite,R.Kramer,M.M.Gottardis	Cancer Res.,2009,69,,6522	P21	1D	[0,1,0]	B2*0D	2C1
YEZBIQ	C21 H26 N2 O4 S3	N-(1-Cyclohexylprop-2-en-1-yl)-N-(((phenylsulfonyl)amino)sulfanyl)benzenesulfonamide.	Hongli Bao,U.K.Tambar	J.AM.CHEM.SOC.,2012,134,,18495	P1	0D		B01	1M2-1
YIGQEM	C19 H21 N1 O2 S1	N-(1,1-Dimethyl-1,1a,6,6a-tetrahydrocyclopropa[a]inden-6-yl)-4-methylbenzenesulfonamide.	Hsiao-Hua Hung,Yi-Ching Liao,Rai-Shung Liu	ADV.SYNTH.CATAL.,2013,355,,1545	P-1	0D		B01	1M2-1
YUCCIJ03	C14 H11 Cl1 N2 O4 S1	2-Chloro-5-(1-hydroxy-3-oxo-2,3-dihydro-1H-isoindol-1-yl)benzenesulfonamide.	F.T.Martins,Rudy Bonfilio,I.M.L.Rosa,L.M.Santos,O.M.M.Santos,M.B.Araujo,A.C.Doriguetto	CRYSTENGCOMM,2013,15,,3767	P21	2D	(1,0,-2)	G22	sql/Shubnikov tetragonal plane net
ZEBYAI	C5 H6 N2 O2 S1	Pyridine-2-sulfonamide.	K.Akiri,S.Cherukuvada,S.Rana,A.Nangia	CRYST.GROWTH DES.,2012,12,,4567	P21/c	1D	[1,0,0]	K21	SP 1-periodic net (4,4)(0,2)
ZEBYEM	C5 H6 N2 O2 S1	Pyridine-3-sulfonamide.	K.Akiri,S.Cherukuvada,S.Rana,A.Nangia	CRYST.GROWTH DES.,2012,12,,4567	P-1	1D	[0,0,1]	K02	2C1
ZEBYOW	C5 H6 N2 O2 S1	Pyridine-4-sulfonamide.	K.Akiri,S.Cherukuvada,S.Rana,A.Nangia	CRYST.GROWTH DES.,2012,12,,4567	P-1	1D	[0,1,1]	K21*B2	2,3C2
ZZZPUS11	C12 H18 N2 O3 S1	N-[(butylamino)carbonyl]-4-methylbenzenesulfonamide.	T.N.Drebushchak,N.A.Pankrushina,E.V.Boldyreva	DOKL.AKAD.NAUK SSSR(RUSS.)(PROC.NAT.ACAD.SCI.USSR),2011,437,,61	P21/n	1D	[0,1,0]	K011)2*K002	2C1
ACAPEA	C9 H13 N1 O3 S1	N-(2-Hydroxyethyl)benzenesulfonamide.	J.C.Galvez-Ruiz,J.C.Jaen-Gaspar,I.G.Castellanos-Arzola,R.Contreras,A.Flores-Parra	Heterocycles,2004,63,,2269	P21	0D		T11*B11*B01)2	1,2M4-1
ACAZIO	C6 H8 N2 O2 S1	N-(3-Pyridyl)methanesulfonamide.	N.I.Dodoff,R.A.Varga,D.Kovala-Demertzi	Z.NATURFORSCH.,B:CHEM.SCI.,2004,59,,1070	P21/c	1D	[1,0,1]	B2	2C1
ACIROT	C19 H23 N1 O4 S2	anti-2-(Methylsulfanyl)-3-phenyl-3-(toluene-4-sulfonamido)propionic acidethyl ester.	V.K.Aggarwal,J.P.H.Charmant,C.Ciampi,J.M.Hornby,C.J.O'Brien,G.Hynd,R.Parsons	J.CHEM.SOC.,PERKIN TRANS.1,2001,,,3159	P21/c	0D		B01	1M2-1
ACIROT	C19 H23 N1 O4 S2	anti-2-(Methylsulfanyl)-3-phenyl-3-(toluene-4-sulfonamido)propionic acidethyl ester.	V.K.Aggarwal,J.P.H.Charmant,C.Ciampi,J.M.Hornby,C.J.O'Brien,G.Hynd,R.Parsons	J.CHEM.SOC.,PERKIN TRANS.1,2001,,,3159	P21/c	0D		B01	1M2-1
ACIROT	C19 H23 N1 O4 S2	anti-2-(Methylsulfanyl)-3-phenyl-3-(toluene-4-sulfonamido)propionic acidethyl ester.	V.K.Aggarwal,J.P.H.Charmant,C.Ciampi,J.M.Hornby,C.J.O'Brien,G.Hynd,R.Parsons	J.CHEM.SOC.,PERKIN TRANS.1,2001,,,3159	P21/c	0D		B01	1M2-1
ACIRUZ	C19 H23 N1 O4 S2	syn-2-(Methylsulfanyl)-3-phenyl-3-(toluene-4-sulfonamido)propionic acid ethylester.	V.K.Aggarwal,J.P.H.Charmant,C.Ciampi,J.M.Hornby,C.J.O'Brien,G.Hynd,R.Parsons	J.CHEM.SOC.,PERKIN TRANS.1,2001,,,3159	P21/c	0D		B01	1M2-1
ACIRUZ	C19 H23 N1 O4 S2	syn-2-(Methylsulfanyl)-3-phenyl-3-(toluene-4-sulfonamido)propionic acid ethylester.	V.K.Aggarwal,J.P.H.Charmant,C.Ciampi,J.M.Hornby,C.J.O'Brien,G.Hynd,R.Parsons	J.CHEM.SOC.,PERKIN TRANS.1,2001,,,3159	P21/c	0D		B01	1M2-1
ANOFIT	C21 H20 Cl1 N1 O2 S1	N-(1-(4-Chlorophenyl)-1-phenylethyl)-4-methylbenzenesulfonamide.	R.Shintani,M.Takeda,T.Tsuji,T.Hayashi	J.AM.CHEM.SOC.,2010,132,,13168	P21	0D		B01	1M2-1
AQULEE	C29 H33 N1 O3 S1	N-Benzyl-N-(3-cyclohexyl-3-hydroxy-2-phenylprop-1-en-1-yl)-4-methylbenzenesulfonamide.	P.Valenta,P.J.Carroll,P.J.Walsh	J.AM.CHEM.SOC.,2010,132,,14179	P21	1D	[0,1,0]	B2	2C1
AQULEE	C29 H33 N1 O3 S1	N-Benzyl-N-(3-cyclohexyl-3-hydroxy-2-phenylprop-1-en-1-yl)-4-methylbenzenesulfonamide.	P.Valenta,P.J.Carroll,P.J.Walsh	J.AM.CHEM.SOC.,2010,132,,14179	P21	1D	[0,1,0]	B2	2C1
AQULEE	C29 H33 N1 O3 S1	N-Benzyl-N-(3-cyclohexyl-3-hydroxy-2-phenylprop-1-en-1-yl)-4-methylbenzenesulfonamide.	P.Valenta,P.J.Carroll,P.J.Walsh	J.AM.CHEM.SOC.,2010,132,,14179	P21	1D	[0,1,0]	B2	2C1
AQULEE	C29 H33 N1 O3 S1	N-Benzyl-N-(3-cyclohexyl-3-hydroxy-2-phenylprop-1-en-1-yl)-4-methylbenzenesulfonamide.	P.Valenta,P.J.Carroll,P.J.Walsh	J.AM.CHEM.SOC.,2010,132,,14179	P21	1D	[0,1,0]	B2	2C1
ATEHAJ	C29 H23 Cl1 I1 N1 O3 S1	N-(3-(4-Chlorophenyl)-2-iodo-6-methoxy-1-phenyl-1H-inden-1-yl)-4-methylbenzenesulfonamide.	Yuanxun Zhu,Guangwei Yin,Deng Hong,Ping Lu,Yanguang Wang	Org.Lett.,2011,13,,1024	P-1	0D		B01	1M2-1
ATEHAJ	C29 H23 Cl1 I1 N1 O3 S1	N-(3-(4-Chlorophenyl)-2-iodo-6-methoxy-1-phenyl-1H-inden-1-yl)-4-methylbenzenesulfonamide.	Yuanxun Zhu,Guangwei Yin,Deng Hong,Ping Lu,Yanguang Wang	Org.Lett.,2011,13,,1024	P-1	0D		B01	1M2-1
ATOVIO	C14 H17 N1 O2 S1	N-((1S,3S,6R)-(Tricyclo(2.2.1.0^2,6^)hept-3-yl))-4-methylbenzenesulfonamide.	P.Muller,D.Riegert,G.Bernardinelli	HELV.CHIM.ACTA,2004,87,,227	P21	0D		B01	1M2-1
AXAYAA	C14 H14 Cl1 N1 O2 S1	4-Chloro-N-(3,5-dimethylphenyl)benzenesulfonamide.	K.Shakuntala,S.Foro,B.T.Gowda	ACTA CRYSTALLOGR.,SECT.E:STRUCT.REP.ONLINE,2011,67,,o2102	Pbca	0D		M1	1M2-1
AYOSUD	C15 H21 N1 O5 S1	4-((4-Methoxybenzenesulfonamido)methyl)cyclohexane-1-carboxylic acid.	M.Ashfaq,S.Iram,M.Akkurt,I.U.Khan,G.Mustafa,M.Danish	ACTA CRYSTALLOGR.,SECT.E:STRUCT.REP.ONLINE,2011,67,,o2248	P-1	2D	(0,1,2)	K21	hcb; Shubnikov hexagonal plane net/(6,3)
AZESEE	C13 H12 Cl1 N1 O2 S1	N-(4-methylphenyl)-3-chlorobenzenesulfonamide.	P.Sanphui,B.Sarma,A.Nangia	CRYST.GROWTH DES.,2010,10,,4550	P21/c	1D	[0,1,0]	B2	2C1
AZESEE01	C13 H12 Cl1 N1 O2 S1	N-(4-methylphenyl)-3-chlorobenzenesulfonamide.	P.Sanphui,B.Sarma,A.Nangia	CRYST.GROWTH DES.,2010,10,,4550	P21/n	1D	[0,1,0]	T3*M1	1,3M4-1
AZESII	C14 H15 N1 O2 S1	N-(4-methylphenyl)-3-methylbenzenesulfonamide.	P.Sanphui,B.Sarma,A.Nangia	CRYST.GROWTH DES.,2010,10,,4550	P21/n	1D	[0,1,0]	T3*M1	1,3M4-1
AZUKOW	C15 H16 Cl1 N1 O2 S1	4-Chloro-N-(2,3-dimethylphenyl)-2-methylbenzenesulfonamide.	V.Z.Rodrigues,S.Foro,B.T.Gowda,K.Shakuntala	ACTA CRYSTALLOGR.,SECT.E:STRUCT.REP.ONLINE,2011,67,,o2674	P-1	0D		B01	1M2-1
AZUQUI	C13 H14 N2 O2 S1	N-(4-Aminophenyl)-4-methylbenzenesulfonamide.	J.Rehman,Ejaz,I.U.Khan,W.T.A.Harrison	ACTA CRYSTALLOGR.,SECT.E:STRUCT.REP.ONLINE,2011,67,,o2709	P212121	3D		G6	wgy; 6/3/t11 or skd; 6/3/o3
BAGCAP	C46 H58 N6 O4 S2	4-Methyl-N-(1-(2-phenyl-1H-imidazol-5-yl)heptyl)benzenesulfonamide4-methyl-N-(1-(2-phenyl-1H-imidazol-4-yl)heptyl)benzenesulfonamide.	L.Albrecht,L.K.Ransborg,A.Albrecht,L.Lykke,K.A.Jorgensen	Chem.-Eur.J.,2011,17,,13240	P21	2D	(0,0,1)	K21	hcb; Shubnikov hexagonal plane net/(6,3)
BEDMIG	C10 H13 Cl1 N2 O3 S1	4-Chloro-N-((propylamino)-carbonyl)-benzenesulfonamide.	C.H.Koo,S.I.Cho,Y.H.Yeon	Arch.Pharm.Res.,1980,3,,37	P212121	1D	[1,0,0]	K002	2C1
BEDMIG11	C10 H13 Cl1 N2 O3 S1	4-chloro-N-(propylaminocarbonyl)benzenesulfonamide.	T.N.Drebushchak,V.A.Drebushchak,E.V.Boldyreva	ACTA CRYSTALLOGR.,SECT.B:STRUCT.SCI.,2011,67,,163	P2/c	1D	[0,1,0]	K02	2C1
BEWKUJ13	C11 H11 N3 O2 S1	4-Amino-N-2-pyridinyl-benzenesulfonamide.	I.Bar,J.Bernstein	J.Pharm.Sci.,1985,74,,255	Pbca	2D	(0,0,1)	P31*T11	New topology
BEWKUJ14	C22 H22 N6 O4 S2	4-amino-N-(2-pyridyl)benzenesulfonamide4-amino-N-(pyridin-2(1H)-ylidine)benzenesulfonamide.	T.Gelbrich,T.L.Threlfall,A.L.Bingham,M.B.Hursthouse	ACTA CRYSTALLOGR.,SECT.C:CRYST.STRUCT.COMMUN.,2007,63,,o323	P21/n	3D		G41*K21	nov; 5/4/o8
BEWKUJ14	C22 H22 N6 O4 S2	4-amino-N-(2-pyridyl)benzenesulfonamide4-amino-N-(pyridin-2(1H)-ylidine)benzenesulfonamide.	T.Gelbrich,T.L.Threlfall,A.L.Bingham,M.B.Hursthouse	ACTA CRYSTALLOGR.,SECT.C:CRYST.STRUCT.COMMUN.,2007,63,,o323	P21/n	2D	(1,0,-1)	G41*K21	hcb; Shubnikov hexagonal plane net/(6,3)
CAZFEP	C18 H22 N2 O4 S3	N,N'-Tetrahydrothiene-3,4-diyl-bis(4-methylbenzenesulfonamide).	D.Sureshkumar,S.M.Koutha,S.Chandrasekaran	J.AM.CHEM.SOC.,2005,127,,12760	P21	1D	[0,1,0]	K02	2C1
CAZFEP	C18 H22 N2 O4 S3	N,N'-Tetrahydrothiene-3,4-diyl-bis(4-methylbenzenesulfonamide).	D.Sureshkumar,S.M.Koutha,S.Chandrasekaran	J.AM.CHEM.SOC.,2005,127,,12760	P21	1D	[0,1,0]	K02	2C1
CERWAX01	C12 H12 N2 O2 S1	4-Methyl-N-(1H-pyridin-2-ylidene)benzenesulfonamide.	T.A.Mayer,M.B.Hursthouse,T.L.Threlfall,S.J.Coles	University of Southampton, Crystal Structure Report Archive,2000,,,	P21/c	0D		B01	1M2-1
COYVIV	C9 H10 N4 O2 S2	2-(5-Amino-1,3,4-thiadiazol-2-yl)-N-methyl-benzenesulfonamide.	E.Foresti,L.Riva di Sanseverino,P.Sabatino	ACTA CRYSTALLOGR.,SECT.C:CRYST.STRUCT.COMMUN.,1985,41,,240	P21/a	1D	[0,0,1]	G22*T21	3,4C4
DAFKAY	C20 H32 N2 O4 S2	N-(2-Hydroxy-3-(N-methyl-S-phenylsulfonimidoyl)octahydro-1H-inden-1-yl)-2-methylpropane-2-sulfonamide.	S.Acikalin,G.Raabe,J.Runsink,H.-J.Gais	EUR.J.ORG.CHEM.,2011,,,5991	P21	0D		B01	1M2-1
DAFKEC	C19 H30 N2 O4 S2	N-(2-Hydroxy-3-(N-methyl-S-phenylsulfonimidoyl)octahydropentalen-1-yl)-2-methylpropane-2-sulfonamide.	S.Acikalin,G.Raabe,J.Runsink,H.-J.Gais	EUR.J.ORG.CHEM.,2011,,,5991	P21	0D		B01	1M2-1
DEZQUU	C18 H21 N8 O7 P1 S1	bis(2-Azidoethyl) [(3-nitrophenyl)-(p-toluenesulfonamido)methyl]phosphonate.	Jin-Nan Zhang,Ling Ye,Hong-Wei Xi,Qi Li	ACTA CRYSTALLOGR.,SECT.C:CRYST.STRUCT.COMMUN.,1999,55,,9900157	P21/c	0D		B01	1M2-1
DUNBEU	C14 H12 Cl1 N1 O3 S1	N-(4-Chlorobenzoyl)-4-methylbenzenesulfonamide.	P.A.Suchetan,B.T.Gowda,S.Foro,H.Fuess	ACTA CRYSTALLOGR.,SECT.E:STRUCT.REP.ONLINE,2010,66,,o327	C2/c	0D		B2	2M4-1
DUNYER	C13 H13 N1 O2 S1	N-(3-Methylphenyl)benzenesulfonamide.	B.T.Gowda,S.Foro,P.G.Nirmala,H.Fuess	ACTA CRYSTALLOGR.,SECT.E:STRUCT.REP.ONLINE,2010,66,,o434	P212121	1D	[1,0,0]	B2	2C1
DUNYER	C13 H13 N1 O2 S1	N-(3-Methylphenyl)benzenesulfonamide.	B.T.Gowda,S.Foro,P.G.Nirmala,H.Fuess	ACTA CRYSTALLOGR.,SECT.E:STRUCT.REP.ONLINE,2010,66,,o434	P212121	1D	[0,1,0]	B2	2C1
DUNYIV	C13 H13 N1 O2 S1	N-(4-Methylphenyl)benzenesulfonamide.	B.T.Gowda,S.Foro,P.G.Nirmala,H.Fuess	ACTA CRYSTALLOGR.,SECT.E:STRUCT.REP.ONLINE,2010,66,,o435	P21/c	1D	[0,1,0]	T3*M1	1,3M4-1
DUPFOK	C13 H19 N1 O3 S1	cis-N-(2-Hydroxycyclohexyl)-p-toluenesulfonamide.	M.I.Fadlalla,H.B.Friedrich,G.E.M.Maguire,M.D.Bala	ACTA CRYSTALLOGR.,SECT.E:STRUCT.REP.ONLINE,2010,66,,o463	P-1	1D	[1,0,0]	K02	2C1
DUSWEU	C14 H12 Cl1 N1 O3 S1	N-(4-Chlorobenzoyl)-2-methylbenzenesulfonamide.	P.A.Suchetan,B.T.Gowda,S.Foro,H.Fuess	ACTA CRYSTALLOGR.,SECT.E:STRUCT.REP.ONLINE,2010,66,,o1997	P-1	0D		B01	1M2-1
EGUZEM	C14 H15 N1 O2 S1	2,4-Dimethyl-N-phenylbenzenesulfonamide.	B.T.Gowda,S.Foro,P.G.Nirmala,K.S.Babitha,H.Fuess	ACTA CRYSTALLOGR.,SECT.E:STRUCT.REP.ONLINE,2009,65,,o576	Pca21	1D	[0,0,1]	B2	2C1
ETOMUV	C12 H11 N1 O3 S1	2-Phenoxybenzenesulfonamide.	C.Glidewell,J.N.Low,J.M.S.Skakle,J.L.Wardell	ACTA CRYSTALLOGR.,SECT.C:CRYST.STRUCT.COMMUN.,2004,60,,o364	P-1	1D	[1,0,0]	B2	2C1
ETOMUV	C12 H11 N1 O3 S1	2-Phenoxybenzenesulfonamide.	C.Glidewell,J.N.Low,J.M.S.Skakle,J.L.Wardell	ACTA CRYSTALLOGR.,SECT.C:CRYST.STRUCT.COMMUN.,2004,60,,o364	P-1	1D	[1,0,0]	B2	2C1
EVACUA	C15 H14 N2 O5 S1	2-(4-Acetamidobenzenesulfonamido)benzoic acid.	S.Sharif,I.U.Khan,T.Mahmood,S.K.Kang	ACTA CRYSTALLOGR.,SECT.E:STRUCT.REP.ONLINE,2011,67,,o1570	P21	2D	(1,0,0)	K4	sql/Shubnikov tetragonal plane net
EVACUA	C15 H14 N2 O5 S1	2-(4-Acetamidobenzenesulfonamido)benzoic acid.	S.Sharif,I.U.Khan,T.Mahmood,S.K.Kang	ACTA CRYSTALLOGR.,SECT.E:STRUCT.REP.ONLINE,2011,67,,o1570	P21	2D	(0,0,1)	K4	sql/Shubnikov tetragonal plane net
FALGOP	C12 H21 N1 O6 S2	anti-6-Methanesulfonamido-3-methyl-2-oxa-1-adamantyl methanesulfonate.	P.Camps,E.Gomez,D.Munoz-Torrero,M.Font-Bardia,X.Solans	TETRAHEDRON,2003,59,,4143	Cc	0D		B01	1M2-1
FAVHEP	C15 H24 N2 O2 S1	N-(2-Aminocyclohexyl)-2,4,6-trimethylbenzenesulfonamide.	J.Balsells,L.Mejorado,M.Phillips,F.Ortega,G.Aguirre,R.Somanathan,P.J.Walsh	TETRAHEDRON:ASYMM.,1998,9,,4135	P-1	0D		M1	1M2-1
FAXBUB05	C13 H13 N1 O2 S1	4-Methyl-N-phenylbenzenesulfonamide.	K.S.Eccles,S.P.Stokes,C.A.Daly,N.M.Barry,S.P.McSweeney,D.J.O'Neill,D.M.Kelly,W.B.Jennings,O.M.N.Dhubhghaill,H.A.Moynihan,A.R.Maguire,S.E.Lawrence	J.APPL.CRYSTALLOGR.,2011,44,,213	P-1	0D		B01	1M2-1
FAXBUB05	C13 H13 N1 O2 S1	4-Methyl-N-phenylbenzenesulfonamide.	K.S.Eccles,S.P.Stokes,C.A.Daly,N.M.Barry,S.P.McSweeney,D.J.O'Neill,D.M.Kelly,W.B.Jennings,O.M.N.Dhubhghaill,H.A.Moynihan,A.R.Maguire,S.E.Lawrence	J.APPL.CRYSTALLOGR.,2011,44,,213	P-1	0D		B01	1M2-1
FEYPAB01	C13 H14 N2 O2 S1	4-Methyl-N-(4-methyl-1H-pyridin-2-ylidene)benzenesulfonamide.	T.A.Mayer,M.B.Hursthouse,T.L.Threlfall,S.J.Coles	University of Southampton, Crystal Structure Report Archive,2000,,,	P21/n	0D		B01	1M2-1
FIXNUV	C15 H14 N4 O2 S1	4-Amino-N-(1-phenyl-1H-pyrazol-5-yl)benzenesulfonamide.	H.C.Patel,T.P.Singh	ACTA CRYSTALLOGR.,SECT.C:CRYST.STRUCT.COMMUN.,1987,43,,1131	P21/n	1D	[0,1,0]	T3	SP 1-periodic net (4,4)(0,2)
FUZRIC	C17 H25 N1 O3 S1	N-Benzyl-1-(2-hydroxy-7,7-dimethylbicyclo[2.2.1]hept-1-yl)methanesulfonamide.	A.Kozakiewicz,M.Ullrich,M.Weniak,A.Wojtczak	J.Mol.Catal.A:Chem.,2010,326,,128	P212121	0D		M1	1M2-1
GAQBUX	C13 H18 N2 O3 S1	2-(N-Cyclohexylcarbamoyl)benzenesulfonamide.	W.A.Siddiqui,A.Ashraf,H.L.Siddiqui,M.Akram,M.Parvez	ACTA CRYSTALLOGR.,SECT.E:STRUCT.REP.ONLINE,2012,68,,o370	Pca21	2D	(1,0,0)	K4	sql/Shubnikov tetragonal plane net
GARMOC	C26 H36 I2 N2 O12 S2	catena-((\m~2~-N-(1-methoxycarbonyl-3-methylbutyl)-2-iodylbenzenesulfonamide)(N-(1-methoxycarbonyl-3-methylbutyl)-2-iodylbenzenesulfonamide)).	A.Y.Koposov,V.N.Nemykin,V.V.Zhdankin	New J.Chem.,2005,29,,998	P21	1D	[0,1,0]	B2	2C1
GARMOC	C26 H36 I2 N2 O12 S2	catena-((\m~2~-N-(1-methoxycarbonyl-3-methylbutyl)-2-iodylbenzenesulfonamide)(N-(1-methoxycarbonyl-3-methylbutyl)-2-iodylbenzenesulfonamide)).	A.Y.Koposov,V.N.Nemykin,V.V.Zhdankin	New J.Chem.,2005,29,,998	P21	1D	[0,1,0]	B2	2C1
GESSOM	C8 H11 N1 O2 S1	N-Methyltoluene-p-sulfonamide.	A.-M.Hakkinen,P.Ruostesuo,R.Kivekas	J.CHEM.SOC.,PERKIN TRANS.2,1988,,,815	P21	1D	[1,0,0]	B2	2C1
GUHVAH	C17 H25 N1 O3 S1	N-(((1R,2S,5S)-2-Hydroxy-6,6-dimethylbicyclo(3.1.1)heptan-2-yl)methyl)-4-methylbenzenesulfonamide.	K.Z.Laczkowski,A.Kmieciak,A.Kozakiewicz	TETRAHEDRON:ASYMM.,2009,20,,1487	P21	1D	[0,1,0]	K02	2C1
HIVFIC	C33 H39 B1 N2 O2 S1	5-(Dimethylamino)-N-(3-(dimesitylboryl)prop-2-enyl)naphthalene-1-sulfonamide.	Wai-Yeung Wong,Suk-Yue Poon,Mei-Fang Lin,Wai-Kwok Wong	AUST.J.CHEM.,2007,60,,915	P-1	0D		B01	1M2-1
HIVFIC	C33 H39 B1 N2 O2 S1	5-(Dimethylamino)-N-(3-(dimesitylboryl)prop-2-enyl)naphthalene-1-sulfonamide.	Wai-Yeung Wong,Suk-Yue Poon,Mei-Fang Lin,Wai-Kwok Wong	AUST.J.CHEM.,2007,60,,915	P-1	0D		B01	1M2-1
HIYHEC	C17 H14 Cl2 N2 O4 S2	2,4-Dichloro-N-(2,3-dihydro-4-(2,5-dimethoxyphenyl)thiazol-2-ylidene)benzenesulfonamide..	P.Beuchet,J.-M.Leger,M.Varache-Lembege,A.Nuhrich	ACTA CRYSTALLOGR.,SECT.C:CRYST.STRUCT.COMMUN.,1999,55,,791	P-1	0D		B01*0D	1M2-1
HUGNED	C12 H9 Cl2 N1 O2 S1	N-(2,4-Dichlorophenyl)benzenesulfonamide.	B.T.Gowda,S.Foro,P.G.Nirmala,H.Fuess	ACTA CRYSTALLOGR.,SECT.E:STRUCT.REP.ONLINE,2010,66,,o229	P21/c	0D		B01	1M2-1
JAWHOF	C15 H16 N2 O3 S1	4-((1E)-2-(2-Hydroxybenzylideneamino)ethyl)benzensulfonamide.	R.R.Coombs,M.K.Ringer,J.M.Blacquiere,J.C.Smith,J.S.Neilsen,Yoon-Seo Uh,J.B.Gilbert,L.J.Leger,Haiwen Zhang,A.M.Irving,S.L.Wheaton,C.M.VogelsS.A.Westcott,A.Decken,F.J.Baerlocher	TRANSITION MET.CHEM.,2005,30,,411	Pn	2D	(1,0,1)	K5*T3	3,5L50
KALMOB	C22 H27 N1 O3 S1	N-(4-Ethyl-4-hydroxy-2-methyl-6-phenylhex-5-yn-3-yl)-4-methylbenzenesulfonamide.	Weidong Rao,D.Susanti,P.W.H.Chan	J.AM.CHEM.SOC.,2011,133,,15248	P21	1D	[0,1,0]	K21*B01	1,3M4-1
KENDOX	C20 H18 N2 O5 S1	N-((E)-3-(2-Furyl)-2-nitro-1-phenylprop-2-enyl)-4-methylbenzenesulfonamide.	N.Rastogi,R.Mohan,D.Panda,S.M.Mobin,I.N.N.Namboothiri	ORG.BIOMOL.CHEM.,2006,4,,3211	P-1	0D		B01	1M2-1
KENDOX	C20 H18 N2 O5 S1	N-((E)-3-(2-Furyl)-2-nitro-1-phenylprop-2-enyl)-4-methylbenzenesulfonamide.	N.Rastogi,R.Mohan,D.Panda,S.M.Mobin,I.N.N.Namboothiri	ORG.BIOMOL.CHEM.,2006,4,,3211	P-1	0D		B01	1M2-1
KIKJAQ	C9 H11 N1 O4 S1	2-(4-Methylphenylsulfonamido)acetic acid.	Dao-Fa He,Xin-Ju Ma,Lin Lin Ma,Shan Shu,Zhi-Min Jin	ACTA CRYSTALLOGR.,SECT.E:STRUCT.REP.ONLINE,2007,63,,o3719	P21/c	0D		B01	1M2-1
KIKJAQ	C9 H11 N1 O4 S1	2-(4-Methylphenylsulfonamido)acetic acid.	Dao-Fa He,Xin-Ju Ma,Lin Lin Ma,Shan Shu,Zhi-Min Jin	ACTA CRYSTALLOGR.,SECT.E:STRUCT.REP.ONLINE,2007,63,,o3719	P21/c	0D		B01	1M2-1
KITRAH	C23 H20 N2 O2 S1	4-Methyl-N-(4-methyl-3-phenylquinolin-2(1H)-ylidene)benzenesulfonamide.	Sun-Liang Cui,Jing Wang,Yan-Guang Wang	TETRAHEDRON,2008,64,,487	P-1	0D		M1	1M2-1
KIZCIG	C22 H21 Br1 N2 O2 S1	(R)-N-((4-bromophenyl)(4,7-dihydro-1H-indol-2-yl)methyl)-4-methylbenzenesulfonamide.	Qiang Kang,Xiao-Jian Zheng,Shu-Li You	Chem.-Eur.J.,2008,14,,3539	P21	2D	(0,0,1)	K4	sql/Shubnikov tetragonal plane net
KIZCIG	C22 H21 Br1 N2 O2 S1	(R)-N-((4-bromophenyl)(4,7-dihydro-1H-indol-2-yl)methyl)-4-methylbenzenesulfonamide.	Qiang Kang,Xiao-Jian Zheng,Shu-Li You	Chem.-Eur.J.,2008,14,,3539	P21	2D	(0,0,1)	K4	sql/Shubnikov tetragonal plane net
KUSMUH	C15 H15 N1 O3 S1	2-Methyl-N-(4-methylbenzoyl)benzenesulfonamide.	B.T.Gowda,S.Foro,P.A.Suchetan,H.Fuess	ACTA CRYSTALLOGR.,SECT.E:STRUCT.REP.ONLINE,2010,66,,o747	P-1	0D		B01	1M2-1
KUSRIA	C13 H10 Cl1 N1 O3 S1	N-Benzoyl-4-chlorobenzenesulfonamide.	P.A.Suchetan,B.T.Gowda,S.Foro,H.Fuess	ACTA CRYSTALLOGR.,SECT.E:STRUCT.REP.ONLINE,2010,66,,o766	P-1	0D		B01	1M2-1
KUSRIA	C13 H10 Cl1 N1 O3 S1	N-Benzoyl-4-chlorobenzenesulfonamide.	P.A.Suchetan,B.T.Gowda,S.Foro,H.Fuess	ACTA CRYSTALLOGR.,SECT.E:STRUCT.REP.ONLINE,2010,66,,o766	P-1	0D		B01	1M2-1
LAKREW	C13 H17 N1 O2 S3	N-(6,7-Dithiabicyclo[3.2.1]oct-8-yl)-4-methylbenzenesulfonamide.	D.Sureshkumar,S.Koutha,V.Ganesh,S.Chandrasekaran	J.ORG.CHEM.,2010,75,,5533	P21/c	0D		B01	1M2-1
LANGUE	C14 H12 N2 O5 S1	N-(4-Methylbenzoyl)-2-nitrobenzenesulfonamide.	P.A.Suchetan,S.Foro,B.T.Gowda	ACTA CRYSTALLOGR.,SECT.E:STRUCT.REP.ONLINE,2012,68,,o572	P-1	0D		M1	1M2-1
MOYSOJ01	C31 H32 N4 O5 S2	N,N'-((2-Hydroxypropane-1,3-diyl)bis(nitrilomethylylidene-2,1-phenylene))bis(4-methylbenzenesulfonamide).	M.V.Lopez,M.R.Bermejo,M.E.Vazquez,A.Taglietti,G.Zaragoza,R.Pedrido,M.Martinez-Calvo	ORG.BIOMOL.CHEM.,2010,8,,357	I2	1D	[0,1,0]	B2	2C1
MOYSOJ01	C31 H32 N4 O5 S2	N,N'-((2-Hydroxypropane-1,3-diyl)bis(nitrilomethylylidene-2,1-phenylene))bis(4-methylbenzenesulfonamide).	M.V.Lopez,M.R.Bermejo,M.E.Vazquez,A.Taglietti,G.Zaragoza,R.Pedrido,M.Martinez-Calvo	ORG.BIOMOL.CHEM.,2010,8,,357	I2	1D	[0,1,0]	B2	2C1
MUDCEU	C27 H27 Br1 N2 O6 S1 Si1	N-((2-Bromophenyl)(3-(dimethyl(phenyl)silyl)-2-ethyl-5-oxo-2,5-dihydrofuran-2-yl)methyl)-4-nitrobenzenesulfonamide.	R.A.Brawn,J.S.Panek	Org.Lett.,2009,11,,4362	P21/n	0D		B01	1M2-1
NEBZEA	C16 H18 N4 O3 S1	N-(Amino(3-benzylureido)methylene)-4-methylbenzenesulfonamide.	P.Prabhakaran,V.G.Puranik,G.J.Sanjayan	J.ORG.CHEM.,2005,70,,10067	Cc	1D	[1,-1,0];[1,1,0]	P0101	2C1
NIFFUE	C17 H19 N1 O4 S1	Methyl 2-(4-methylphenylsulfonamido)-3-phenylpropanoate.	Ping Yin,Mao-Lin Hu,Jing Xiong,Xiao-Wei Yan	ACTA CRYSTALLOGR.,SECT.E:STRUCT.REP.ONLINE,2007,63,,o2707	P212121	1D	[1,0,0]	B2	2C1
NUPMER	C16 H19 N1 O2 S1	N-(2,3-Dimethylphenyl)-2,4-dimethylbenzenesulfonamide.	P.G.Nirmala,B.T.Gowda,S.Foro,H.Fuess	ACTA CRYSTALLOGR.,SECT.E:STRUCT.REP.ONLINE,2010,66,,o1017	P-1	0D		B01	1M2-1
NUQBUX	C26 H23 N2 O3 P1 S1	4-Acetamido-N-(\l^5^-triphenylphosphoranylidene)benzenesulfonamide.	B.Prugovecki,M.Marinkovic,M.Vinkovic,M.Dumic	ACTA CRYSTALLOGR.,SECT.E:STRUCT.REP.ONLINE,2010,66,,o1098	P21/n	1D	[1,0,0]	B2	2C1
OPEHOH	C16 H16 N2 O4 S2	N,N'-Dimethylanthracene-1,8-disulfonamide.	Zhi-Qiang Hu,Xu-Dong Yang,Cun-Li Cui,Lei Ding,Cun-Sheng Lin,Hai-Yan Lu,Lei Wang	Sens.Actuators,B,2010,145,,61	P-421c	2D	(0,0,1)	G2001*B2	New topology
OSUTAY	C16 H15 N3 O3 S1	N-Benzyl-4-(5-methyl-1,2,4-oxadiazol-3-yl)benzenesulfonamide.	S.Dosa,J.Daniels,M.Gutschow	J.HETEROCYCL.CHEM.,2011,48,,407	P-1	0D		B2*M1)2	1,2M3-1
PEGXIJ	C22 H19 Br1 N2 O2 S1	(S)-N-((4-Bromophenyl)(indol-3-yl)methyl)-4-methylbenzenesulfonamide.	Yi-Xia Jia,Jian-Hua Xie,Hai-Feng Duan,Li-Xin Wang,Qi-Lin Zhou	Org.Lett.,2006,8,,1621	C2	1D	[0,1,0]	T4	SP 1-periodic net (4,4)(2,2)
PEGXIJ	C22 H19 Br1 N2 O2 S1	(S)-N-((4-Bromophenyl)(indol-3-yl)methyl)-4-methylbenzenesulfonamide.	Yi-Xia Jia,Jian-Hua Xie,Hai-Feng Duan,Li-Xin Wang,Qi-Lin Zhou	Org.Lett.,2006,8,,1621	C2	1D	[0,1,0]	T4	SP 1-periodic net (4,4)(2,2)
PEMWEK	C16 H15 Br1 Cl1 N5 O3 S1	3-((((2-Bromophenyl)amino)(cyanoamino)methylidene)amino)-6-chloro-2-hydroxy-N, N-dimethylbenzenesulfonamide.	Hong Nie,K.L.Widdowson,M.R.Palovich,Wei Fu,J.D.Elliott,D.L.Bryan,M.Burman,D.B.Schmidt,J.J.Foley,H.M.Sarau,J.Busch-Petersen	BIOORG.MED.CHEM.LETT.,2006,16,,5513	Pca21	0D		B01	1M2-1
PILGOH	C15 H17 N1 O2 S1	4-Methyl-N-(2,4-dimethylphenyl)benzenesulfonamide.	Fa-En Shi	ACTA CRYSTALLOGR.,SECT.E:STRUCT.REP.ONLINE,2007,63,,o4004	P-1	0D		B01	1M2-1
PILGOH	C15 H17 N1 O2 S1	4-Methyl-N-(2,4-dimethylphenyl)benzenesulfonamide.	Fa-En Shi	ACTA CRYSTALLOGR.,SECT.E:STRUCT.REP.ONLINE,2007,63,,o4004	P-1	0D		B01	1M2-1
PODQEF	C15 H16 N2 O3 S1	2-((2,6-Dimethylphenyl)carbamoyl)benzenesulfonamide.	W.A.Siddiqui,S.Ahmad,H.L.Siddiqui,M.Parvez	ACTA CRYSTALLOGR.,SECT.C:CRYST.STRUCT.COMMUN.,2008,64,,o367	P-1	2D	(0,0,1)	P31*T3	3,4L88
POPJUA	C17 H15 N3 O4 S1	4-((2-Hydroxybenzylidene)amino)-N-(5-methyl-3-isoxazolyl)benzenesulfonamide.	A.Subashini,M.Hemamalini,P.T.Muthiah,G.Bocelli,A.Cantoni	J.Chem.Cryst.,2009,39,,112	P-1	0D		B01	1M2-1
POPJUA	C17 H15 N3 O4 S1	4-((2-Hydroxybenzylidene)amino)-N-(5-methyl-3-isoxazolyl)benzenesulfonamide.	A.Subashini,M.Hemamalini,P.T.Muthiah,G.Bocelli,A.Cantoni	J.Chem.Cryst.,2009,39,,112	P-1	0D		B01	1M2-1
QAJJOC	C15 H17 N1 O2 S1	2,4-Dimethyl-N-(4-methylphenyl)benzenesulfonamide.	P.G.Nirmala,S.Foro,B.T.Gowda	ACTA CRYSTALLOGR.,SECT.E:STRUCT.REP.ONLINE,2011,67,,o6	P21/c	0D		B01	1M2-1
QAJYOR	C4 H13 N1 O2 S1 Si1	N-(Trimethylsilyl)methanesulfonamide.	A.R.McWilliams,S.Gezahegna,A.J.Lough	ACTA CRYSTALLOGR.,SECT.E:STRUCT.REP.ONLINE,2011,67,,o93	P21	1D	[0,0,1]	B2	2C1
QASNIJ	C38 H36 N1 O4 P1 S1	4-Butyl-N-((2,2'-dimethoxy-1,1'-binaphthalen-3-yl)(phenyl)phosphino)benzenesulfonamide.	F.W.Patureau,M.A.Siegler,A.L.Spek,A.J.Sandee,S.Juge,S.Aziz,A.Berkessel,J.N.H.Reek	EUR.J.INORG.CHEM.,2012,,,496	P1	0D		B01	1M2-1
QAWMIL	C20 H19 Cl2 N1 O3 S1	N-[1-(2,3-dichlorophenyl)-4-methyl-5-oxohexa-2,3-dienyl]-4-methylbenzenesulfonamide.	Gui-Ling Zhao,Min Shi	ORG.BIOMOL.CHEM.,2005,3,,3686	P21/c	1D	[1,0,0]	B2	2C1
QISQOZ	C7 H8 Cl1 N1 O2 S1	2-Methyl-4-chloro-benzenesulfonamide.	B.T.Gowda,Srilatha,S.Foro,J.Kozisek,H.Fuess	Z.NATURFORSCH.,A:PHYS.SCI.,2007,62,,417	P1	2D	(0,0,1)	K4*T3	3,4L22
QOMZOI	C17 H25 N1 O2 S1	N-((1R,2S,3R)-2-Allyl-3-methylcyclohexyl)-4-toluenesulfonamide.	E.W.Dijk,L.Panella,P.Pinho,R.Naasz,A.Meetsma,A.J.Minnaard,B.L.Feringa	TETRAHEDRON,2004,60,,9687	P21	0D		B01	1M2-1
RALGIW	C36 H31 F12 N3 O4 S2	N,N'-bis(3,5-bis(Trifluoromethyl)phenyl)-3,6-di-t-butyl-9H-carbazole-1,8-disulfonamide.	A.L.F.de Arriba,M.G.Turiel,L.Simon,F.Sanz,J.F.Boyero,F.M.Muniz,J.R.Moran,V.Alcazar	ORG.BIOMOL.CHEM.,2011,9,,8321	C2/c	0D		T001	1M2-1
RAWCOJ	C18 H14 F6 N2 O4 S2	N-(2-(1-(Methylsulfonyl)-5-(trifluoromethyl)-1H-indol-2-yl)-4-(trifluoromethyl)phenyl)methanesulfonamide.	A.Nakhi,B.Prasad,U.Reddy,R.M.Rao,S.Sandra,R.Kapavarapu,D.Rambabu,G.R.Krishna,C.M.Reddy,K.Ravada,P.Misra,J.Iqbal,M.Pal	MedChemComm,2011,2,,1006	Pn	0D		B01	1M2-1
RAXXOF	C24 H27 N1 O5 S1	N-((3,5-Dimethylphenyl)(2-hydroxy-4,6-dimethoxyphenyl)methyl)-4-methylbenzenesulfonamide.	Guo-Xing Li,Jin Qu	CHEM.COMMUN.,2012,48,,5518	P21	1D	[0,1,0]	B2	2C1
RAXXOF	C24 H27 N1 O5 S1	N-((3,5-Dimethylphenyl)(2-hydroxy-4,6-dimethoxyphenyl)methyl)-4-methylbenzenesulfonamide.	Guo-Xing Li,Jin Qu	CHEM.COMMUN.,2012,48,,5518	P21	1D	[0,1,0]	B2	2C1
REKLID	C23 H19 F3 N2 O2 S1	(-)-(S)-N-(\a-(3-Indolyl)-4-trifluoromethylbenzyl)-p-toluenesulfonamide.	Yong-Qiang Wang,Jun Song,Ran Hong,Hongming Li,Li Deng	J.AM.CHEM.SOC.,2006,128,,8156	C2	1D	[0,1,0]	T4	SP 1-periodic net (4,4)(2,2)
REKLID	C23 H19 F3 N2 O2 S1	(-)-(S)-N-(\a-(3-Indolyl)-4-trifluoromethylbenzyl)-p-toluenesulfonamide.	Yong-Qiang Wang,Jun Song,Ran Hong,Hongming Li,Li Deng	J.AM.CHEM.SOC.,2006,128,,8156	C2	1D	[0,1,0]	T4	SP 1-periodic net (4,4)(2,2)
REMBUH	C28 H21 N3 O4 S1	N-2-(6,11-dioxonaphthalene-5H-benzo[b]carbazole)-5-dimethylaminonaphthalenesulfonamide.	R.A.Illos,D.Shamir,L.J.W.Shimon,I.Zilbermann,S.Bittner	TETRAHEDRON LETT.,2006,47,,5543	Pca21	2D	(0,0,1)	K21	hcb; Shubnikov hexagonal plane net/(6,3)
RITDUU	C11 H9 N3 O4 S1	2-Nitro-N-(4-pyridinio)benzenesulfonamidate.	Jiang-Sheng Li,Dao-Wu Yang,Wei-Dong Liu	ACTA CRYSTALLOGR.,SECT.E:STRUCT.REP.ONLINE,2008,64,,o204	P-1	1D	[0,1,0]	B2	2C1
SLFNMA02	C11 H12 N4 O2 S1	4-Amino-N-(4-methyl-2-pyrimidinyl)benzenesulfonamide.	M.R.Caira,R.Mohamed	ACTA CRYSTALLOGR.,SECT.B:STRUCT.SCI.,1992,48,,492	Pn21a	1D	[0,0,1]	K21	SP 1-periodic net (4,4)(0,2)
SOLRER	C13 H12 Cl1 N1 O2 S1	4-Chloro-2-methyl-N-phenylbenzenesulfonamide.	B.T.Gowda,S.Foro,P.G.Nirmala,K.S.Babitha,H.Fuess	ACTA CRYSTALLOGR.,SECT.E:STRUCT.REP.ONLINE,2009,65,,o476	P-1	0D		B01	1M2-1
SOLRER	C13 H12 Cl1 N1 O2 S1	4-Chloro-2-methyl-N-phenylbenzenesulfonamide.	B.T.Gowda,S.Foro,P.G.Nirmala,K.S.Babitha,H.Fuess	ACTA CRYSTALLOGR.,SECT.E:STRUCT.REP.ONLINE,2009,65,,o476	P-1	0D		B01	1M2-1
SUTHAZ05	C9 H9 N3 O2 S2	4-Amino-N-thiazol-2-ylidene-benzenesulfonamide.	D.S.Hughes,M.B.Hursthouse,T.Threlfall,S.Tavener	ACTA CRYSTALLOGR.,SECT.C:CRYST.STRUCT.COMMUN.,1999,55,,1831	P21/n	2D	(0,0,1)	G6*G42	hxl/Shubnikov plane net (3,6)
SUTHAZ06	C9 H9 N3 O2 S2	4-Amino-N-(2,3-dihydro-2-thiazolylidene)benzenesulfonamide.	Fung Choy Chan,J.Anwar,R.Cernik,P.Barnes,R.McHardy Wilson	J.APPL.CRYSTALLOGR.,1999,32,,436	P21/n	2D	(1,0,0)	K5	SP 2-periodic net (4.8^2)IIa or tts; Shubnikov plane net (3^2.4.3.4)
SUTHAZ07	C9 H9 N3 O2 S2	4-Amino-N-(2-thiazolyl)benzenesulfonamide.	T.N.Drebushchak,E.V.Boldyreva,M.A.Mikhailenko	Zh.Strukt.Khim.(Russ.)(J.Struct.Chem.),2008,49,,90	P21/c	3D		H51*P31	4,6T129
SUTHAZ08	C9 H9 N3 O2 S2	4-Amino-N-(2-thiazolyl)benzenesulfonamide.	T.N.Drebushchak,E.V.Boldyreva,M.A.Mikhailenko	Zh.Strukt.Khim.(Russ.)(J.Struct.Chem.),2008,49,,90	P21/c	2D	(1,0,0)	G41*K21	hcb; Shubnikov hexagonal plane net/(6,3)
[truncated: 39 more rows]

## Sheet: S7_halogen
YUQHAU	C21 H24 Cl1 N1 O6 S1	Methyl5-chloro-2-[N-(3-ethoxycarbonylpropyl)-4-methylbenzenesulfonamido]benzoate.	Bin Wang,Ru Jia,Ya-Bin Shi,Fei-Fei He,Hai-Bo Wang	ACTA CRYSTALLOGR.,SECT.E:STRUCT.REP.ONLINE,2010,66,,o1819	P212121	1D	[1,0,0]	B2	2C1
[truncated: 15 more rows]

[truncated: 3 more sheets: S8_Mixed_all_contacts, S9_Mixed_H_bonds, S10_Mixed_specific]
